# Supplementary material
Source: publisher figshare collection journal article supplement (https://acs.figshare.com/ndownloader/files/3757618)
Supplement: Supplementary file 1 [file 3757618]

 
data_14036 
  
_audit_creation_method            SHELXL-2014 
_chemical_name_systematic 
; 
 ? 
; 
_chemical_name_common             ? 
_chemical_melting_point           ? 
_chemical_formula_moiety          ? 
_chemical_formula_sum 
 'C47 H64 Br O2 P Pd S' 
_chemical_formula_weight          910.32 
  
loop_ 
 _atom_type_symbol 
 _atom_type_description 
 _atom_type_scat_dispersion_real 
 _atom_type_scat_dispersion_imag 
 _atom_type_scat_source 
 'C'  'C'   0.0033   0.0016 
 'International Tables Vol C Tables 4.2.6.8 and 6.1.1.4' 
 'H'  'H'   0.0000   0.0000 
 'International Tables Vol C Tables 4.2.6.8 and 6.1.1.4' 
 'O'  'O'   0.0106   0.0060 
 'International Tables Vol C Tables 4.2.6.8 and 6.1.1.4' 
 'P'  'P'   0.1023   0.0942 
 'International Tables Vol C Tables 4.2.6.8 and 6.1.1.4' 
 'S'  'S'   0.1246   0.1234 
 'International Tables Vol C Tables 4.2.6.8 and 6.1.1.4' 
 'Br'  'Br'  -0.2901   2.4595 
 'International Tables Vol C Tables 4.2.6.8 and 6.1.1.4' 
 'Pd'  'Pd'  -0.9988   1.0072 
 'International Tables Vol C Tables 4.2.6.8 and 6.1.1.4' 
  
_space_group_crystal_system       triclinic 
_space_group_IT_number            2 
_space_group_name_H-M_alt         'P -1' 
_space_group_name_Hall            '-P 1' 
  
_shelx_space_group_comment 
; 
The symmetry employed for this shelxl refinement is uniquely defined 
by the following loop, which should always be used as a source of 
symmetry information in preference to the above space-group names. 
They are only intended as comments. 
; 
  
loop_ 
 _space_group_symop_operation_xyz 
 'x, y, z' 
 '-x, -y, -z' 
  
_cell_length_a                    11.4610(3) 
_cell_length_b                    13.5662(3) 
_cell_length_c                    15.6083(4) 
_cell_angle_alpha                 66.5161(12) 
_cell_angle_beta                  89.9625(13) 
_cell_angle_gamma                 74.4572(12) 
_cell_volume                      2128.89(9) 
_cell_formula_units_Z             2 
_cell_measurement_temperature     100(2) 
_cell_measurement_reflns_used     9765 
_cell_measurement_theta_min       2.28 
_cell_measurement_theta_max       30.53 
  
_exptl_crystal_description        blade 
_exptl_crystal_colour             orange 
_exptl_crystal_density_meas       . 
_exptl_crystal_density_method     'not measured' 
_exptl_crystal_density_diffrn     1.420 
_exptl_crystal_F_000              948 
_exptl_transmission_factor_min    ? 
_exptl_transmission_factor_max    ? 
_exptl_crystal_size_max           0.600 
_exptl_crystal_size_mid           0.090 
_exptl_crystal_size_min           0.050 
_exptl_absorpt_coefficient_mu     1.498 
_shelx_estimated_absorpt_T_min    0.467 
_shelx_estimated_absorpt_T_max    0.929 
_exptl_absorpt_correction_type    multi-scan 
_exptl_absorpt_correction_T_min   0.6043  
_exptl_absorpt_correction_T_max   0.7461  
_exptl_absorpt_process_details    'SADABS (Sheldrick, 2009)' 
  
_exptl_special_details 
; 
 'Siemens three-circle diffractometer, Bruker APEX CCD' 
; 
  
_diffrn_ambient_temperature       100(2) 
_diffrn_radiation_wavelength      0.71073 
_diffrn_radiation_type            MoK\a 
_diffrn_source                    'fine-focus sealed tube, graphite' 
_diffrn_measurement_device_type   'Bruker Smart APEX CCD' 
_diffrn_measurement_method        '\f and \w scans' 
_diffrn_detector_area_resol_mean  8.3 
_diffrn_reflns_number             104796 
_diffrn_reflns_av_unetI/netI      0.0169 
_diffrn_reflns_av_R_equivalents   0.0293 
_diffrn_reflns_limit_h_min        -16 
_diffrn_reflns_limit_h_max        16 
_diffrn_reflns_limit_k_min        -19 
_diffrn_reflns_limit_k_max        19 
_diffrn_reflns_limit_l_min        -21 
_diffrn_reflns_limit_l_max        21 
_diffrn_reflns_theta_min          1.433 
_diffrn_reflns_theta_max          30.032 
_diffrn_reflns_theta_full         25.242 
_diffrn_measured_fraction_theta_max   0.999 
_diffrn_measured_fraction_theta_full  1.000 
_diffrn_reflns_Laue_measured_fraction_max    0.999 
_diffrn_reflns_Laue_measured_fraction_full   1.000 
_diffrn_reflns_point_group_measured_fraction_max   0.999 
_diffrn_reflns_point_group_measured_fraction_full  1.000 
_reflns_number_total              12442 
_reflns_number_gt                 11274 
_reflns_threshold_expression      'I > 2\s(I)' 
_reflns_Friedel_coverage          0.000 
_reflns_Friedel_fraction_max      . 
_reflns_Friedel_fraction_full     . 
  
_reflns_special_details 
; 
 Reflections were merged by SHELXL according to the crystal 
 class for the calculation of statistics and refinement. 
  
 _reflns_Friedel_fraction is defined as the number of unique 
 Friedel pairs measured divided by the number that would be 
 possible theoretically, ignoring centric projections and 
 systematic absences. 
; 
  
_computing_data_collection        'APEX2 v2011.4.0 (Bruker-AXS, 2011)' 
_computing_cell_refinement        'SAINT 7.46A (Bruker-AXS, 2011)' 
_computing_data_reduction         'SAINT 7.46A (Bruker-AXS, 2011)' 
_computing_structure_solution     'SHELXS-97 (Sheldrick, 2008)' 
_computing_structure_refinement   'SHELXL-2014 (Sheldrick, 2014)' 
_computing_molecular_graphics     'Bruker SHELXTL' 
_computing_publication_material   'Bruker SHELXTL' 
  
_refine_special_details 
; 
 'The thiophen ring is disordered.' 
; 
_refine_ls_structure_factor_coef  Fsqd 
_refine_ls_matrix_type            full 
_refine_ls_weighting_scheme       calc 
_refine_ls_weighting_details 
'w=1/[\s^2^(Fo^2^)+(0.0249P)^2^+1.8554P] where P=(Fo^2^+2Fc^2^)/3' 
_atom_sites_solution_primary      direct 
_atom_sites_solution_secondary    difmap 
_atom_sites_solution_hydrogens    geom 
_refine_ls_hydrogen_treatment     constr 
_refine_ls_extinction_method      none 
_refine_ls_extinction_coef        . 
_refine_ls_number_reflns          12442 
_refine_ls_number_parameters      499 
_refine_ls_number_restraints      198 
_refine_ls_R_factor_all           0.0288 
_refine_ls_R_factor_gt            0.0240 
_refine_ls_wR_factor_ref          0.0608 
_refine_ls_wR_factor_gt           0.0586 
_refine_ls_goodness_of_fit_ref    1.082 
_refine_ls_restrained_S_all       1.084 
_refine_ls_shift/su_max           0.001 
_refine_ls_shift/su_mean          0.000 
  
loop_ 
 _atom_site_label 
 _atom_site_type_symbol 
 _atom_site_fract_x 
 _atom_site_fract_y 
 _atom_site_fract_z 
 _atom_site_U_iso_or_equiv 
 _atom_site_adp_type 
 _atom_site_occupancy 
 _atom_site_site_symmetry_order 
 _atom_site_calc_flag 
 _atom_site_refinement_flags_posn 
 _atom_site_refinement_flags_adp 
 _atom_site_refinement_flags_occupancy 
 _atom_site_disorder_assembly 
 _atom_site_disorder_group 
Pd1 Pd 0.38888(2) 0.42520(2) 0.26609(2) 0.00957(3) Uani 1 1 d D . . . . 
Br1 Br 0.55734(2) 0.50994(2) 0.23726(2) 0.01904(4) Uani 1 1 d . . . . . 
P1 P 0.23771(3) 0.33959(3) 0.32671(2) 0.00930(6) Uani 1 1 d . . . . . 
C1 C 0.23803(12) 0.30508(12) 0.45837(10) 0.0105(2) Uani 1 1 d . . . . . 
C2 C 0.17844(13) 0.21331(12) 0.51755(10) 0.0124(2) Uani 1 1 d . . . . . 
H2A H 0.0924 0.2348 0.4910 0.015 Uiso 1 1 calc R U . . . 
H2B H 0.2219 0.1410 0.5150 0.015 Uiso 1 1 calc R U . . . 
C3 C 0.18410(14) 0.19927(13) 0.62078(10) 0.0143(3) Uani 1 1 d . . . . . 
H3 H 0.1439 0.1411 0.6577 0.017 Uiso 1 1 calc R U . . . 
C4 C 0.31761(14) 0.16126(13) 0.66321(10) 0.0153(3) Uani 1 1 d . . . . . 
H4A H 0.3606 0.0885 0.6614 0.018 Uiso 1 1 calc R U . . . 
H4B H 0.3216 0.1511 0.7297 0.018 Uiso 1 1 calc R U . . . 
C5 C 0.37910(13) 0.25063(13) 0.60632(10) 0.0138(3) Uani 1 1 d . . . . . 
H5 H 0.4665 0.2258 0.6332 0.017 Uiso 1 1 calc R U . . . 
C6 C 0.37242(13) 0.26712(12) 0.50251(10) 0.0119(2) Uani 1 1 d . . . . . 
H6A H 0.4164 0.1957 0.4988 0.014 Uiso 1 1 calc R U . . . 
H6B H 0.4129 0.3244 0.4665 0.014 Uiso 1 1 calc R U . . . 
C7 C 0.17318(13) 0.41638(12) 0.46638(10) 0.0123(2) Uani 1 1 d . . . . . 
H7A H 0.2124 0.4746 0.4301 0.015 Uiso 1 1 calc R U . . . 
H7B H 0.0867 0.4426 0.4392 0.015 Uiso 1 1 calc R U . . . 
C8 C 0.17974(14) 0.40009(13) 0.56981(10) 0.0142(3) Uani 1 1 d . . . . . 
H8 H 0.1367 0.4729 0.5731 0.017 Uiso 1 1 calc R U . . . 
C9 C 0.11677(14) 0.31143(13) 0.62495(11) 0.0160(3) Uani 1 1 d . . . . . 
H9A H 0.0307 0.3360 0.5974 0.019 Uiso 1 1 calc R U . . . 
H9B H 0.1179 0.3020 0.6912 0.019 Uiso 1 1 calc R U . . . 
C10 C 0.31366(14) 0.36240(13) 0.61186(11) 0.0156(3) Uani 1 1 d . . . . . 
H10A H 0.3180 0.3526 0.6782 0.019 Uiso 1 1 calc R U . . . 
H10B H 0.3538 0.4202 0.5764 0.019 Uiso 1 1 calc R U . . . 
C11 C 0.23819(13) 0.21278(12) 0.30206(10) 0.0111(2) Uani 1 1 d . . . . . 
C12 C 0.25697(14) 0.24562(12) 0.19705(10) 0.0137(3) Uani 1 1 d . . . . . 
H12A H 0.1856 0.3078 0.1572 0.016 Uiso 1 1 calc R U . . . 
H12B H 0.3301 0.2724 0.1845 0.016 Uiso 1 1 calc R U . . . 
C13 C 0.27292(15) 0.14466(13) 0.17135(11) 0.0160(3) Uani 1 1 d . . . . . 
H13 H 0.2866 0.1676 0.1037 0.019 Uiso 1 1 calc R U . . . 
C14 C 0.15701(15) 0.10683(13) 0.18670(11) 0.0178(3) Uani 1 1 d . . . . . 
H14A H 0.1661 0.0422 0.1701 0.021 Uiso 1 1 calc R U . . . 
H14B H 0.0862 0.1689 0.1459 0.021 Uiso 1 1 calc R U . . . 
C15 C 0.13611(14) 0.07297(13) 0.29060(11) 0.0161(3) Uani 1 1 d . . . . . 
H15 H 0.0604 0.0486 0.3010 0.019 Uiso 1 1 calc R U . . . 
C16 C 0.12098(13) 0.17450(12) 0.31614(11) 0.0138(3) Uani 1 1 d . . . . . 
H16A H 0.1048 0.1532 0.3825 0.017 Uiso 1 1 calc R U . . . 
H16B H 0.0505 0.2373 0.2758 0.017 Uiso 1 1 calc R U . . . 
C17 C 0.34856(13) 0.11271(12) 0.36337(10) 0.0128(3) Uani 1 1 d . . . . . 
H17A H 0.4241 0.1360 0.3535 0.015 Uiso 1 1 calc R U . . . 
H17B H 0.3370 0.0899 0.4307 0.015 Uiso 1 1 calc R U . . . 
C18 C 0.36124(14) 0.01247(12) 0.33710(11) 0.0153(3) Uani 1 1 d . . . . . 
H18 H 0.4323 -0.0515 0.3776 0.018 Uiso 1 1 calc R U . . . 
C19 C 0.38281(15) 0.04713(13) 0.23321(11) 0.0181(3) Uani 1 1 d . . . . . 
H19A H 0.4581 0.0708 0.2228 0.022 Uiso 1 1 calc R U . . . 
H19B H 0.3930 -0.0175 0.2163 0.022 Uiso 1 1 calc R U . . . 
C20 C 0.24486(15) -0.02455(13) 0.35296(11) 0.0175(3) Uani 1 1 d . . . . . 
H20A H 0.2537 -0.0899 0.3373 0.021 Uiso 1 1 calc R U . . . 
H20B H 0.2312 -0.0474 0.4199 0.021 Uiso 1 1 calc R U . . . 
C46 C 0.52837(13) 0.28376(12) 0.30665(10) 0.0138(3) Uani 1 1 d D U . . . 
S1 S 0.57756(9) 0.24661(8) 0.21727(5) 0.01603(18) Uani 0.720(2) 1 d D U P A 1 
C47 C 0.6097(8) 0.2134(7) 0.3884(5) 0.0142(6) Uani 0.720(2) 1 d D U P A 1 
H47 H 0.6007 0.2206 0.4464 0.017 Uiso 0.720(2) 1 calc R U P A 1 
C48 C 0.7072(5) 0.1301(5) 0.3773(3) 0.0162(6) Uani 0.720(2) 1 d D U P A 1 
H48 H 0.7693 0.0766 0.4264 0.019 Uiso 0.720(2) 1 calc R U P A 1 
C49 C 0.7008(3) 0.1362(4) 0.2876(3) 0.0164(6) Uani 0.720(2) 1 d D U P A 1 
H49 H 0.7563 0.0867 0.2669 0.020 Uiso 0.720(2) 1 calc R U P A 1 
S1A S 0.6178(5) 0.2086(4) 0.4068(3) 0.0142(6) Uani 0.280(2) 1 d D U P A 2 
C47A C 0.5712(11) 0.2438(10) 0.2362(7) 0.01603(18) Uani 0.280(2) 1 d D U P A 2 
H47A H 0.5324 0.2755 0.1735 0.019 Uiso 0.280(2) 1 calc R U P A 2 
C48A C 0.6776(10) 0.1520(11) 0.2716(9) 0.0164(6) Uani 0.280(2) 1 d D U P A 2 
H48A H 0.7212 0.1160 0.2351 0.020 Uiso 0.280(2) 1 calc R U P A 2 
C49A C 0.7100(15) 0.1216(14) 0.3633(10) 0.0162(6) Uani 0.280(2) 1 d D U P A 2 
H49A H 0.7768 0.0587 0.4000 0.019 Uiso 0.280(2) 1 calc R U P A 2 
C21 C 0.09478(12) 0.45277(12) 0.26540(10) 0.0103(2) Uani 1 1 d . . . . . 
C22 C -0.02320(13) 0.44143(12) 0.28475(10) 0.0116(2) Uani 1 1 d . . . . . 
C23 C -0.12757(13) 0.52372(12) 0.23083(10) 0.0130(3) Uani 1 1 d . . . . . 
H23 H -0.2052 0.5115 0.2409 0.016 Uiso 1 1 calc R U . . . 
C24 C -0.11850(13) 0.62417(13) 0.16197(10) 0.0137(3) Uani 1 1 d . . . . . 
H24 H -0.1899 0.6804 0.1246 0.016 Uiso 1 1 calc R U . . . 
C25 C -0.00496(13) 0.64228(12) 0.14787(10) 0.0119(2) Uani 1 1 d . . . . . 
C26 C 0.10315(12) 0.55598(12) 0.19716(9) 0.0099(2) Uani 1 1 d . . . . . 
C27 C -0.14213(14) 0.32272(14) 0.37328(12) 0.0199(3) Uani 1 1 d . . . . . 
H27A H -0.2023 0.3824 0.3836 0.030 Uiso 1 1 calc R U . . . 
H27B H -0.1310 0.2510 0.4278 0.030 Uiso 1 1 calc R U . . . 
H27C H -0.1711 0.3173 0.3167 0.030 Uiso 1 1 calc R U . . . 
C28 C -0.09480(15) 0.83806(13) 0.05484(11) 0.0190(3) Uani 1 1 d . . . . . 
H28A H -0.1526 0.8302 0.0134 0.028 Uiso 1 1 calc R U . . . 
H28B H -0.0706 0.9061 0.0203 0.028 Uiso 1 1 calc R U . . . 
H28C H -0.1335 0.8435 0.1094 0.028 Uiso 1 1 calc R U . . . 
O1 O -0.02790(9) 0.34841(9) 0.36125(8) 0.0148(2) Uani 1 1 d . . . . . 
O2 O 0.01045(10) 0.74248(9) 0.08592(8) 0.0152(2) Uani 1 1 d . . . . . 
C31 C 0.21847(12) 0.58933(12) 0.16977(10) 0.0102(2) Uani 1 1 d . . . . . 
C32 C 0.25002(13) 0.66267(12) 0.20443(10) 0.0114(2) Uani 1 1 d . . . . . 
C33 C 0.32154(13) 0.73021(12) 0.15454(10) 0.0133(3) Uani 1 1 d . . . . . 
H33 H 0.3425 0.7784 0.1784 0.016 Uiso 1 1 calc R U . . . 
C34 C 0.36298(13) 0.72930(12) 0.07116(10) 0.0134(3) Uani 1 1 d . . . . . 
C35 C 0.33158(13) 0.65772(12) 0.03698(10) 0.0136(3) Uani 1 1 d . . . . . 
H35 H 0.3608 0.6554 -0.0194 0.016 Uiso 1 1 calc R U . . . 
C36 C 0.25917(13) 0.59004(12) 0.08256(10) 0.0114(2) Uani 1 1 d . . . . . 
C37 C 0.20006(13) 0.67831(12) 0.29004(10) 0.0125(3) Uani 1 1 d . . . . . 
H37 H 0.1510 0.6247 0.3175 0.015 Uiso 1 1 calc R U . . . 
C38 C 0.11522(14) 0.79775(13) 0.26213(11) 0.0170(3) Uani 1 1 d . . . . . 
H38A H 0.1598 0.8523 0.2309 0.026 Uiso 1 1 calc R U . . . 
H38B H 0.0866 0.8065 0.3186 0.026 Uiso 1 1 calc R U . . . 
H38C H 0.0451 0.8108 0.2190 0.026 Uiso 1 1 calc R U . . . 
C39 C 0.30369(15) 0.65091(14) 0.36615(11) 0.0177(3) Uani 1 1 d . . . . . 
H39A H 0.3583 0.5753 0.3816 0.027 Uiso 1 1 calc R U . . . 
H39B H 0.2690 0.6541 0.4227 0.027 Uiso 1 1 calc R U . . . 
H39C H 0.3497 0.7058 0.3425 0.027 Uiso 1 1 calc R U . . . 
C40 C 0.43541(15) 0.80723(13) 0.01436(11) 0.0180(3) Uani 1 1 d . . . . . 
H40 H 0.4800 0.7742 -0.0275 0.022 Uiso 1 1 calc R U . . . 
C41 C 0.53030(17) 0.81990(17) 0.07478(14) 0.0287(4) Uani 1 1 d . . . . . 
H41A H 0.5812 0.8621 0.0341 0.043 Uiso 1 1 calc R U . . . 
H41B H 0.5817 0.7454 0.1178 0.043 Uiso 1 1 calc R U . . . 
H41C H 0.4889 0.8604 0.1113 0.043 Uiso 1 1 calc R U . . . 
C42 C 0.34853(19) 0.92188(16) -0.04872(15) 0.0330(4) Uani 1 1 d . . . . . 
H42A H 0.2887 0.9122 -0.0872 0.050 Uiso 1 1 calc R U . . . 
H42B H 0.3950 0.9690 -0.0899 0.050 Uiso 1 1 calc R U . . . 
H42C H 0.3061 0.9581 -0.0096 0.050 Uiso 1 1 calc R U . . . 
C43 C 0.21634(14) 0.52587(12) 0.03433(10) 0.0132(3) Uani 1 1 d . . . . . 
H43 H 0.1775 0.4726 0.0808 0.016 Uiso 1 1 calc R U . . . 
C44 C 0.32281(15) 0.45637(14) 0.00314(11) 0.0188(3) Uani 1 1 d . . . . . 
H44A H 0.3537 0.5069 -0.0500 0.028 Uiso 1 1 calc R U . . . 
H44B H 0.2943 0.4054 -0.0161 0.028 Uiso 1 1 calc R U . . . 
H44C H 0.3882 0.4124 0.0556 0.028 Uiso 1 1 calc R U . . . 
C45 C 0.11978(16) 0.60578(14) -0.05046(11) 0.0214(3) Uani 1 1 d . . . . . 
H45A H 0.0509 0.6478 -0.0296 0.032 Uiso 1 1 calc R U . . . 
H45B H 0.0910 0.5620 -0.0783 0.032 Uiso 1 1 calc R U . . . 
H45C H 0.1559 0.6584 -0.0975 0.032 Uiso 1 1 calc R U . . . 
  
loop_ 
 _atom_site_aniso_label 
 _atom_site_aniso_U_11 
 _atom_site_aniso_U_22 
 _atom_site_aniso_U_33 
 _atom_site_aniso_U_23 
 _atom_site_aniso_U_13 
 _atom_site_aniso_U_12 
Pd1 0.00731(5) 0.01057(5) 0.01153(5) -0.00495(4) 0.00188(3) -0.00313(4) 
Br1 0.01044(7) 0.01649(7) 0.02754(8) -0.00528(6) 0.00125(6) -0.00573(5) 
P1 0.00797(15) 0.00930(15) 0.01174(15) -0.00528(12) 0.00176(12) -0.00280(12) 
C1 0.0099(6) 0.0114(6) 0.0116(6) -0.0056(5) 0.0022(5) -0.0038(5) 
C2 0.0117(6) 0.0132(6) 0.0137(6) -0.0062(5) 0.0028(5) -0.0052(5) 
C3 0.0145(6) 0.0152(7) 0.0136(6) -0.0057(5) 0.0039(5) -0.0056(5) 
C4 0.0156(7) 0.0161(7) 0.0128(6) -0.0053(5) 0.0012(5) -0.0036(5) 
C5 0.0121(6) 0.0172(7) 0.0132(6) -0.0074(5) 0.0009(5) -0.0042(5) 
C6 0.0093(6) 0.0147(6) 0.0128(6) -0.0068(5) 0.0016(5) -0.0034(5) 
C7 0.0122(6) 0.0122(6) 0.0139(6) -0.0071(5) 0.0022(5) -0.0033(5) 
C8 0.0147(7) 0.0142(7) 0.0154(6) -0.0088(5) 0.0031(5) -0.0031(5) 
C9 0.0150(7) 0.0193(7) 0.0156(6) -0.0093(6) 0.0051(5) -0.0048(6) 
C10 0.0169(7) 0.0180(7) 0.0158(6) -0.0102(6) 0.0015(5) -0.0061(6) 
C11 0.0118(6) 0.0093(6) 0.0134(6) -0.0058(5) 0.0002(5) -0.0033(5) 
C12 0.0157(7) 0.0124(6) 0.0136(6) -0.0058(5) 0.0006(5) -0.0043(5) 
C13 0.0217(7) 0.0144(7) 0.0140(6) -0.0079(5) 0.0010(5) -0.0051(6) 
C14 0.0234(8) 0.0143(7) 0.0170(7) -0.0073(5) -0.0040(6) -0.0062(6) 
C15 0.0187(7) 0.0139(7) 0.0180(7) -0.0073(5) -0.0009(5) -0.0075(6) 
C16 0.0124(6) 0.0136(6) 0.0168(6) -0.0066(5) 0.0008(5) -0.0055(5) 
C17 0.0132(6) 0.0120(6) 0.0141(6) -0.0072(5) 0.0001(5) -0.0023(5) 
C18 0.0177(7) 0.0117(6) 0.0163(7) -0.0075(5) -0.0018(5) -0.0011(5) 
C19 0.0210(7) 0.0167(7) 0.0185(7) -0.0111(6) 0.0017(6) -0.0023(6) 
C20 0.0246(8) 0.0117(7) 0.0172(7) -0.0060(5) -0.0016(6) -0.0067(6) 
C46 0.0100(6) 0.0137(6) 0.0173(6) -0.0063(5) 0.0035(5) -0.0029(5) 
S1 0.0138(3) 0.0196(3) 0.0150(4) -0.0093(3) 0.0028(3) -0.00188(19) 
C47 0.0105(8) 0.0159(6) 0.0158(16) -0.0064(11) 0.0016(10) -0.0033(5) 
C48 0.0155(7) 0.0153(11) 0.0183(17) -0.0074(9) -0.0015(11) -0.0045(8) 
C49 0.0091(16) 0.0154(15) 0.0230(17) -0.0098(12) 0.0005(10) 0.0018(11) 
S1A 0.0105(8) 0.0159(6) 0.0158(16) -0.0064(11) 0.0016(10) -0.0033(5) 
C47A 0.0138(3) 0.0196(3) 0.0150(4) -0.0093(3) 0.0028(3) -0.00188(19) 
C48A 0.0091(16) 0.0154(15) 0.0230(17) -0.0098(12) 0.0005(10) 0.0018(11) 
C49A 0.0155(7) 0.0153(11) 0.0183(17) -0.0074(9) -0.0015(11) -0.0045(8) 
C21 0.0089(6) 0.0108(6) 0.0124(6) -0.0064(5) 0.0008(5) -0.0022(5) 
C22 0.0108(6) 0.0122(6) 0.0139(6) -0.0068(5) 0.0018(5) -0.0047(5) 
C23 0.0085(6) 0.0154(7) 0.0167(6) -0.0084(5) 0.0013(5) -0.0034(5) 
C24 0.0103(6) 0.0152(7) 0.0150(6) -0.0073(5) -0.0014(5) -0.0012(5) 
C25 0.0123(6) 0.0123(6) 0.0118(6) -0.0060(5) 0.0008(5) -0.0034(5) 
C26 0.0090(6) 0.0111(6) 0.0117(6) -0.0066(5) 0.0013(5) -0.0031(5) 
C27 0.0126(7) 0.0203(8) 0.0251(8) -0.0043(6) 0.0033(6) -0.0100(6) 
C28 0.0179(7) 0.0126(7) 0.0201(7) -0.0034(6) -0.0026(6) 0.0001(6) 
O1 0.0091(5) 0.0142(5) 0.0189(5) -0.0034(4) 0.0022(4) -0.0056(4) 
O2 0.0128(5) 0.0110(5) 0.0178(5) -0.0030(4) 0.0009(4) -0.0020(4) 
C31 0.0094(6) 0.0101(6) 0.0117(6) -0.0046(5) 0.0015(5) -0.0034(5) 
C32 0.0104(6) 0.0119(6) 0.0131(6) -0.0061(5) 0.0019(5) -0.0040(5) 
C33 0.0127(6) 0.0128(6) 0.0168(6) -0.0074(5) 0.0029(5) -0.0054(5) 
C34 0.0114(6) 0.0118(6) 0.0160(6) -0.0046(5) 0.0034(5) -0.0038(5) 
C35 0.0137(6) 0.0132(6) 0.0137(6) -0.0055(5) 0.0044(5) -0.0038(5) 
C36 0.0110(6) 0.0111(6) 0.0114(6) -0.0047(5) 0.0011(5) -0.0021(5) 
C37 0.0139(6) 0.0136(6) 0.0141(6) -0.0080(5) 0.0042(5) -0.0067(5) 
C38 0.0171(7) 0.0158(7) 0.0216(7) -0.0109(6) 0.0050(6) -0.0053(6) 
C39 0.0190(7) 0.0213(8) 0.0160(7) -0.0095(6) 0.0014(5) -0.0084(6) 
C40 0.0200(7) 0.0166(7) 0.0212(7) -0.0087(6) 0.0106(6) -0.0100(6) 
C41 0.0215(8) 0.0319(10) 0.0347(10) -0.0088(8) 0.0066(7) -0.0189(7) 
C42 0.0339(10) 0.0220(9) 0.0321(10) 0.0037(7) 0.0024(8) -0.0139(8) 
C43 0.0155(6) 0.0129(6) 0.0123(6) -0.0065(5) 0.0016(5) -0.0039(5) 
C44 0.0215(7) 0.0190(7) 0.0193(7) -0.0121(6) 0.0054(6) -0.0046(6) 
C45 0.0245(8) 0.0208(8) 0.0179(7) -0.0100(6) -0.0044(6) -0.0017(6) 
  
_geom_special_details 
; 
 All esds (except the esd in the dihedral angle between two l.s. planes) 
 are estimated using the full covariance matrix.  The cell esds are taken 
 into account individually in the estimation of esds in distances, angles 
 and torsion angles; correlations between esds in cell parameters are only 
 used when they are defined by crystal symmetry.  An approximate (isotropic) 
 treatment of cell esds is used for estimating esds involving l.s. planes. 
; 
  
loop_ 
 _geom_bond_atom_site_label_1 
 _geom_bond_atom_site_label_2 
 _geom_bond_distance 
 _geom_bond_site_symmetry_2 
 _geom_bond_publ_flag 
Pd1 C46 2.0068(15) . ? 
Pd1 P1 2.3337(4) . ? 
Pd1 Br1 2.45510(18) . ? 
Pd1 C31 2.4572(14) . ? 
P1 C21 1.8548(14) . ? 
P1 C11 1.9053(14) . ? 
P1 C1 1.9169(14) . ? 
C1 C7 1.5481(19) . ? 
C1 C6 1.5510(19) . ? 
C1 C2 1.5517(19) . ? 
C2 C3 1.545(2) . ? 
C2 H2A 0.9900 . ? 
C2 H2B 0.9900 . ? 
C3 C4 1.534(2) . ? 
C3 C9 1.538(2) . ? 
C3 H3 1.0000 . ? 
C4 C5 1.534(2) . ? 
C4 H4A 0.9900 . ? 
C4 H4B 0.9900 . ? 
C5 C10 1.538(2) . ? 
C5 C6 1.5438(19) . ? 
C5 H5 1.0000 . ? 
C6 H6A 0.9900 . ? 
C6 H6B 0.9900 . ? 
C7 C8 1.539(2) . ? 
C7 H7A 0.9900 . ? 
C7 H7B 0.9900 . ? 
C8 C9 1.532(2) . ? 
C8 C10 1.537(2) . ? 
C8 H8 1.0000 . ? 
C9 H9A 0.9900 . ? 
C9 H9B 0.9900 . ? 
C10 H10A 0.9900 . ? 
C10 H10B 0.9900 . ? 
C11 C12 1.549(2) . ? 
C11 C17 1.551(2) . ? 
C11 C16 1.551(2) . ? 
C12 C13 1.541(2) . ? 
C12 H12A 0.9900 . ? 
C12 H12B 0.9900 . ? 
C13 C14 1.534(2) . ? 
C13 C19 1.536(2) . ? 
C13 H13 1.0000 . ? 
C14 C15 1.537(2) . ? 
C14 H14A 0.9900 . ? 
C14 H14B 0.9900 . ? 
C15 C20 1.531(2) . ? 
C15 C16 1.548(2) . ? 
C15 H15 1.0000 . ? 
C16 H16A 0.9900 . ? 
C16 H16B 0.9900 . ? 
C17 C18 1.542(2) . ? 
C17 H17A 0.9900 . ? 
C17 H17B 0.9900 . ? 
C18 C20 1.534(2) . ? 
C18 C19 1.538(2) . ? 
C18 H18 1.0000 . ? 
C19 H19A 0.9900 . ? 
C19 H19B 0.9900 . ? 
C20 H20A 0.9900 . ? 
C20 H20B 0.9900 . ? 
C46 C47 1.401(7) . ? 
C46 C47A 1.441(9) . ? 
C46 S1A 1.645(4) . ? 
C46 S1 1.7104(16) . ? 
S1 C49 1.733(3) . ? 
C47 C48 1.427(10) . ? 
C47 H47 0.9500 . ? 
C48 C49 1.370(4) . ? 
C48 H48 0.9500 . ? 
C49 H49 0.9500 . ? 
S1A C49A 1.715(13) . ? 
C47A C48A 1.408(14) . ? 
C47A H47A 0.9500 . ? 
C48A C49A 1.343(12) . ? 
C48A H48A 0.9500 . ? 
C49A H49A 0.9500 . ? 
C21 C26 1.4096(19) . ? 
C21 C22 1.4203(19) . ? 
C22 O1 1.3625(17) . ? 
C22 C23 1.3865(19) . ? 
C23 C24 1.390(2) . ? 
C23 H23 0.9500 . ? 
C24 C25 1.389(2) . ? 
C24 H24 0.9500 . ? 
C25 O2 1.3765(17) . ? 
C25 C26 1.4156(19) . ? 
C26 C31 1.5166(19) . ? 
C27 O1 1.4362(18) . ? 
C27 H27A 0.9800 . ? 
C27 H27B 0.9800 . ? 
C27 H27C 0.9800 . ? 
C28 O2 1.4258(18) . ? 
C28 H28A 0.9800 . ? 
C28 H28B 0.9800 . ? 
C28 H28C 0.9800 . ? 
C31 C32 1.4265(19) . ? 
C31 C36 1.4359(19) . ? 
C32 C33 1.397(2) . ? 
C32 C37 1.5226(19) . ? 
C33 C34 1.389(2) . ? 
C33 H33 0.9500 . ? 
C34 C35 1.399(2) . ? 
C34 C40 1.522(2) . ? 
C35 C36 1.387(2) . ? 
C35 H35 0.9500 . ? 
C36 C43 1.5223(19) . ? 
C37 C38 1.534(2) . ? 
C37 C39 1.541(2) . ? 
C37 H37 1.0000 . ? 
C38 H38A 0.9800 . ? 
C38 H38B 0.9800 . ? 
C38 H38C 0.9800 . ? 
C39 H39A 0.9800 . ? 
C39 H39B 0.9800 . ? 
C39 H39C 0.9800 . ? 
C40 C42 1.527(3) . ? 
C40 C41 1.527(2) . ? 
C40 H40 1.0000 . ? 
C41 H41A 0.9800 . ? 
C41 H41B 0.9800 . ? 
C41 H41C 0.9800 . ? 
C42 H42A 0.9800 . ? 
C42 H42B 0.9800 . ? 
C42 H42C 0.9800 . ? 
C43 C44 1.537(2) . ? 
C43 C45 1.539(2) . ? 
C43 H43 1.0000 . ? 
C44 H44A 0.9800 . ? 
C44 H44B 0.9800 . ? 
C44 H44C 0.9800 . ? 
C45 H45A 0.9800 . ? 
C45 H45B 0.9800 . ? 
C45 H45C 0.9800 . ? 
  
loop_ 
 _geom_angle_atom_site_label_1 
 _geom_angle_atom_site_label_2 
 _geom_angle_atom_site_label_3 
 _geom_angle 
 _geom_angle_site_symmetry_1 
 _geom_angle_site_symmetry_3 
 _geom_angle_publ_flag 
C46 Pd1 P1 96.93(4) . . ? 
C46 Pd1 Br1 81.48(4) . . ? 
P1 Pd1 Br1 167.653(11) . . ? 
C46 Pd1 C31 161.62(5) . . ? 
P1 Pd1 C31 85.15(3) . . ? 
Br1 Pd1 C31 100.25(3) . . ? 
C21 P1 C11 108.20(6) . . ? 
C21 P1 C1 107.19(6) . . ? 
C11 P1 C1 111.27(6) . . ? 
C21 P1 Pd1 102.92(5) . . ? 
C11 P1 Pd1 116.03(5) . . ? 
C1 P1 Pd1 110.52(4) . . ? 
C7 C1 C6 107.49(11) . . ? 
C7 C1 C2 109.25(11) . . ? 
C6 C1 C2 107.53(11) . . ? 
C7 C1 P1 106.73(9) . . ? 
C6 C1 P1 108.03(9) . . ? 
C2 C1 P1 117.43(9) . . ? 
C3 C2 C1 110.11(11) . . ? 
C3 C2 H2A 109.6 . . ? 
C1 C2 H2A 109.6 . . ? 
C3 C2 H2B 109.6 . . ? 
C1 C2 H2B 109.6 . . ? 
H2A C2 H2B 108.2 . . ? 
C4 C3 C9 109.93(12) . . ? 
C4 C3 C2 109.68(12) . . ? 
C9 C3 C2 109.73(12) . . ? 
C4 C3 H3 109.2 . . ? 
C9 C3 H3 109.2 . . ? 
C2 C3 H3 109.2 . . ? 
C3 C4 C5 109.02(12) . . ? 
C3 C4 H4A 109.9 . . ? 
C5 C4 H4A 109.9 . . ? 
C3 C4 H4B 109.9 . . ? 
C5 C4 H4B 109.9 . . ? 
H4A C4 H4B 108.3 . . ? 
C4 C5 C10 109.35(12) . . ? 
C4 C5 C6 110.02(12) . . ? 
C10 C5 C6 109.44(12) . . ? 
C4 C5 H5 109.3 . . ? 
C10 C5 H5 109.3 . . ? 
C6 C5 H5 109.3 . . ? 
C5 C6 C1 110.90(11) . . ? 
C5 C6 H6A 109.5 . . ? 
C1 C6 H6A 109.5 . . ? 
C5 C6 H6B 109.5 . . ? 
C1 C6 H6B 109.5 . . ? 
H6A C6 H6B 108.0 . . ? 
C8 C7 C1 110.81(12) . . ? 
C8 C7 H7A 109.5 . . ? 
C1 C7 H7A 109.5 . . ? 
C8 C7 H7B 109.5 . . ? 
C1 C7 H7B 109.5 . . ? 
H7A C7 H7B 108.1 . . ? 
C9 C8 C10 110.20(12) . . ? 
C9 C8 C7 109.04(12) . . ? 
C10 C8 C7 109.82(12) . . ? 
C9 C8 H8 109.3 . . ? 
C10 C8 H8 109.3 . . ? 
C7 C8 H8 109.3 . . ? 
C8 C9 C3 109.14(12) . . ? 
C8 C9 H9A 109.9 . . ? 
C3 C9 H9A 109.9 . . ? 
C8 C9 H9B 109.9 . . ? 
C3 C9 H9B 109.9 . . ? 
H9A C9 H9B 108.3 . . ? 
C8 C10 C5 108.88(12) . . ? 
C8 C10 H10A 109.9 . . ? 
C5 C10 H10A 109.9 . . ? 
C8 C10 H10B 109.9 . . ? 
C5 C10 H10B 109.9 . . ? 
H10A C10 H10B 108.3 . . ? 
C12 C11 C17 108.77(11) . . ? 
C12 C11 C16 106.73(11) . . ? 
C17 C11 C16 109.15(11) . . ? 
C12 C11 P1 106.17(9) . . ? 
C17 C11 P1 108.57(9) . . ? 
C16 C11 P1 117.17(10) . . ? 
C13 C12 C11 110.92(12) . . ? 
C13 C12 H12A 109.5 . . ? 
C11 C12 H12A 109.5 . . ? 
C13 C12 H12B 109.5 . . ? 
C11 C12 H12B 109.5 . . ? 
H12A C12 H12B 108.0 . . ? 
C14 C13 C19 109.57(13) . . ? 
C14 C13 C12 109.22(13) . . ? 
C19 C13 C12 110.08(12) . . ? 
C14 C13 H13 109.3 . . ? 
C19 C13 H13 109.3 . . ? 
C12 C13 H13 109.3 . . ? 
C13 C14 C15 108.86(12) . . ? 
C13 C14 H14A 109.9 . . ? 
C15 C14 H14A 109.9 . . ? 
C13 C14 H14B 109.9 . . ? 
C15 C14 H14B 109.9 . . ? 
H14A C14 H14B 108.3 . . ? 
C20 C15 C14 109.54(13) . . ? 
C20 C15 C16 109.85(12) . . ? 
C14 C15 C16 109.78(12) . . ? 
C20 C15 H15 109.2 . . ? 
C14 C15 H15 109.2 . . ? 
C16 C15 H15 109.2 . . ? 
C15 C16 C11 110.19(12) . . ? 
C15 C16 H16A 109.6 . . ? 
C11 C16 H16A 109.6 . . ? 
C15 C16 H16B 109.6 . . ? 
C11 C16 H16B 109.6 . . ? 
H16A C16 H16B 108.1 . . ? 
C18 C17 C11 110.23(11) . . ? 
C18 C17 H17A 109.6 . . ? 
C11 C17 H17A 109.6 . . ? 
C18 C17 H17B 109.6 . . ? 
C11 C17 H17B 109.6 . . ? 
H17A C17 H17B 108.1 . . ? 
C20 C18 C19 109.72(12) . . ? 
C20 C18 C17 109.84(12) . . ? 
C19 C18 C17 109.49(12) . . ? 
C20 C18 H18 109.3 . . ? 
C19 C18 H18 109.3 . . ? 
C17 C18 H18 109.3 . . ? 
C13 C19 C18 109.04(13) . . ? 
C13 C19 H19A 109.9 . . ? 
C18 C19 H19A 109.9 . . ? 
C13 C19 H19B 109.9 . . ? 
C18 C19 H19B 109.9 . . ? 
H19A C19 H19B 108.3 . . ? 
C15 C20 C18 109.36(12) . . ? 
C15 C20 H20A 109.8 . . ? 
C18 C20 H20A 109.8 . . ? 
C15 C20 H20B 109.8 . . ? 
C18 C20 H20B 109.8 . . ? 
H20A C20 H20B 108.3 . . ? 
C47A C46 S1A 110.7(5) . . ? 
C47 C46 S1 108.8(4) . . ? 
C47 C46 Pd1 136.1(4) . . ? 
C47A C46 Pd1 117.8(5) . . ? 
S1A C46 Pd1 131.1(2) . . ? 
S1 C46 Pd1 114.40(8) . . ? 
C46 S1 C49 94.15(17) . . ? 
C46 C47 C48 114.3(6) . . ? 
C46 C47 H47 122.9 . . ? 
C48 C47 H47 122.9 . . ? 
C49 C48 C47 112.3(5) . . ? 
C49 C48 H48 123.9 . . ? 
C47 C48 H48 123.9 . . ? 
C48 C49 S1 110.5(4) . . ? 
C48 C49 H49 124.7 . . ? 
S1 C49 H49 124.7 . . ? 
C46 S1A C49A 93.1(6) . . ? 
C48A C47A C46 111.8(9) . . ? 
C48A C47A H47A 124.1 . . ? 
C46 C47A H47A 124.1 . . ? 
C49A C48A C47A 111.7(13) . . ? 
C49A C48A H48A 124.2 . . ? 
C47A C48A H48A 124.2 . . ? 
C48A C49A S1A 112.6(12) . . ? 
C48A C49A H49A 123.7 . . ? 
S1A C49A H49A 123.7 . . ? 
C26 C21 C22 118.11(12) . . ? 
C26 C21 P1 118.62(10) . . ? 
C22 C21 P1 123.26(11) . . ? 
O1 C22 C23 122.23(13) . . ? 
O1 C22 C21 116.42(12) . . ? 
C23 C22 C21 121.29(13) . . ? 
C22 C23 C24 119.93(13) . . ? 
C22 C23 H23 120.0 . . ? 
C24 C23 H23 120.0 . . ? 
C25 C24 C23 119.91(13) . . ? 
C25 C24 H24 120.0 . . ? 
C23 C24 H24 120.0 . . ? 
O2 C25 C24 123.21(13) . . ? 
O2 C25 C26 115.98(12) . . ? 
C24 C25 C26 120.81(13) . . ? 
C21 C26 C25 119.40(12) . . ? 
C21 C26 C31 127.17(12) . . ? 
C25 C26 C31 113.41(12) . . ? 
O1 C27 H27A 109.5 . . ? 
O1 C27 H27B 109.5 . . ? 
H27A C27 H27B 109.5 . . ? 
O1 C27 H27C 109.5 . . ? 
H27A C27 H27C 109.5 . . ? 
H27B C27 H27C 109.5 . . ? 
O2 C28 H28A 109.5 . . ? 
O2 C28 H28B 109.5 . . ? 
H28A C28 H28B 109.5 . . ? 
O2 C28 H28C 109.5 . . ? 
H28A C28 H28C 109.5 . . ? 
H28B C28 H28C 109.5 . . ? 
C22 O1 C27 118.08(11) . . ? 
C25 O2 C28 116.61(12) . . ? 
C32 C31 C36 118.28(12) . . ? 
C32 C31 C26 118.17(12) . . ? 
C36 C31 C26 117.76(12) . . ? 
C32 C31 Pd1 94.48(9) . . ? 
C36 C31 Pd1 93.54(9) . . ? 
C26 C31 Pd1 106.05(9) . . ? 
C33 C32 C31 119.56(13) . . ? 
C33 C32 C37 117.62(12) . . ? 
C31 C32 C37 122.61(12) . . ? 
C34 C33 C32 122.17(13) . . ? 
C34 C33 H33 118.9 . . ? 
C32 C33 H33 118.9 . . ? 
C33 C34 C35 118.25(13) . . ? 
C33 C34 C40 122.07(13) . . ? 
C35 C34 C40 119.62(13) . . ? 
C36 C35 C34 122.22(13) . . ? 
C36 C35 H35 118.9 . . ? 
C34 C35 H35 118.9 . . ? 
C35 C36 C31 119.46(13) . . ? 
C35 C36 C43 118.70(13) . . ? 
C31 C36 C43 121.65(12) . . ? 
C32 C37 C38 111.07(12) . . ? 
C32 C37 C39 111.41(12) . . ? 
C38 C37 C39 110.60(12) . . ? 
C32 C37 H37 107.9 . . ? 
C38 C37 H37 107.9 . . ? 
C39 C37 H37 107.9 . . ? 
C37 C38 H38A 109.5 . . ? 
C37 C38 H38B 109.5 . . ? 
H38A C38 H38B 109.5 . . ? 
C37 C38 H38C 109.5 . . ? 
H38A C38 H38C 109.5 . . ? 
H38B C38 H38C 109.5 . . ? 
C37 C39 H39A 109.5 . . ? 
C37 C39 H39B 109.5 . . ? 
H39A C39 H39B 109.5 . . ? 
C37 C39 H39C 109.5 . . ? 
H39A C39 H39C 109.5 . . ? 
H39B C39 H39C 109.5 . . ? 
C34 C40 C42 109.89(14) . . ? 
C34 C40 C41 113.62(14) . . ? 
C42 C40 C41 110.61(15) . . ? 
C34 C40 H40 107.5 . . ? 
C42 C40 H40 107.5 . . ? 
C41 C40 H40 107.5 . . ? 
C40 C41 H41A 109.5 . . ? 
C40 C41 H41B 109.5 . . ? 
H41A C41 H41B 109.5 . . ? 
C40 C41 H41C 109.5 . . ? 
H41A C41 H41C 109.5 . . ? 
H41B C41 H41C 109.5 . . ? 
C40 C42 H42A 109.5 . . ? 
C40 C42 H42B 109.5 . . ? 
H42A C42 H42B 109.5 . . ? 
C40 C42 H42C 109.5 . . ? 
H42A C42 H42C 109.5 . . ? 
H42B C42 H42C 109.5 . . ? 
C36 C43 C44 112.07(12) . . ? 
C36 C43 C45 111.18(12) . . ? 
C44 C43 C45 109.98(12) . . ? 
C36 C43 H43 107.8 . . ? 
C44 C43 H43 107.8 . . ? 
C45 C43 H43 107.8 . . ? 
C43 C44 H44A 109.5 . . ? 
C43 C44 H44B 109.5 . . ? 
H44A C44 H44B 109.5 . . ? 
C43 C44 H44C 109.5 . . ? 
H44A C44 H44C 109.5 . . ? 
H44B C44 H44C 109.5 . . ? 
C43 C45 H45A 109.5 . . ? 
C43 C45 H45B 109.5 . . ? 
H45A C45 H45B 109.5 . . ? 
C43 C45 H45C 109.5 . . ? 
H45A C45 H45C 109.5 . . ? 
H45B C45 H45C 109.5 . . ? 
  
_refine_diff_density_max    0.693 
_refine_diff_density_min   -1.021 
_refine_diff_density_rms    0.071 
  
_shelxl_version_number 2014-2 
  
_shelx_res_file 
; 
TITL 14036 in P-1 
CELL 0.71073  11.46100  13.56620  15.60830  66.5161  89.9625  74.4572 
ZERR    2.00   0.00030   0.00030   0.00040   0.0012   0.0013   0.0012 
LATT  1 
SFAC C H O P S BR PD 
UNIT 94 128 4 2 2 2 2 
TEMP -173 
SIZE 0.05 0.09 0.60 
  
OMIT    -2   6   2     ! outlier 
  
WPDB -2 
ACTA 
  
L.S. 10 
BOND $H 
FMAP 2 
PLAN 20 
  
simu 0.02 c46 > c49a 
rigu c46 > c49a 
eadp c47 s1a 
eadp c48 c49a 
eadp c49 c48a 
eadp s1 c47a 
  
WGHT    0.024900    1.855400 
FVAR       0.12539   0.71975 
PD1   7    0.388883    0.425199    0.266092    11.00000    0.00731    0.01057 = 
         0.01153   -0.00495    0.00188   -0.00313 
BR1   6    0.557339    0.509937    0.237262    11.00000    0.01044    0.01649 = 
         0.02754   -0.00528    0.00125   -0.00573 
P1    4    0.237714    0.339586    0.326712    11.00000    0.00797    0.00930 = 
         0.01174   -0.00528    0.00176   -0.00280 
C1    1    0.238027    0.305078    0.458373    11.00000    0.00994    0.01137 = 
         0.01159   -0.00563    0.00224   -0.00381 
C2    1    0.178442    0.213306    0.517550    11.00000    0.01174    0.01323 = 
         0.01372   -0.00623    0.00281   -0.00516 
AFIX  23 
H2A   2    0.092356    0.234807    0.491012    11.00000   -1.20000 
H2B   2    0.221871    0.141047    0.514984    11.00000   -1.20000 
AFIX   0 
C3    1    0.184099    0.199267    0.620785    11.00000    0.01454    0.01521 = 
         0.01358   -0.00566    0.00388   -0.00558 
AFIX  13 
H3    2    0.143875    0.141059    0.657676    11.00000   -1.20000 
AFIX   0 
C4    1    0.317610    0.161259    0.663209    11.00000    0.01557    0.01608 = 
         0.01284   -0.00533    0.00117   -0.00365 
AFIX  23 
H4A   2    0.360563    0.088458    0.661408    11.00000   -1.20000 
H4B   2    0.321574    0.151135    0.729667    11.00000   -1.20000 
AFIX   0 
C5    1    0.379101    0.250625    0.606323    11.00000    0.01210    0.01721 = 
         0.01321   -0.00742    0.00087   -0.00420 
AFIX  13 
H5    2    0.466499    0.225793    0.633214    11.00000   -1.20000 
AFIX   0 
C6    1    0.372417    0.267124    0.502509    11.00000    0.00930    0.01470 = 
         0.01283   -0.00679    0.00163   -0.00340 
AFIX  23 
H6A   2    0.416385    0.195675    0.498774    11.00000   -1.20000 
H6B   2    0.412862    0.324437    0.466468    11.00000   -1.20000 
AFIX   0 
C7    1    0.173181    0.416377    0.466381    11.00000    0.01223    0.01221 = 
         0.01394   -0.00705    0.00218   -0.00332 
AFIX  23 
H7A   2    0.212373    0.474609    0.430063    11.00000   -1.20000 
H7B   2    0.086725    0.442615    0.439154    11.00000   -1.20000 
AFIX   0 
C8    1    0.179740    0.400093    0.569809    11.00000    0.01471    0.01423 = 
         0.01544   -0.00875    0.00310   -0.00314 
AFIX  13 
H8    2    0.136708    0.472851    0.573126    11.00000   -1.20000 
AFIX   0 
C9    1    0.116767    0.311428    0.624948    11.00000    0.01496    0.01930 = 
         0.01561   -0.00935    0.00508   -0.00477 
AFIX  23 
H9A   2    0.030665    0.335974    0.597380    11.00000   -1.20000 
H9B   2    0.117942    0.301965    0.691226    11.00000   -1.20000 
AFIX   0 
C10   1    0.313658    0.362400    0.611859    11.00000    0.01690    0.01796 = 
         0.01584   -0.01024    0.00153   -0.00614 
AFIX  23 
H10A  2    0.318002    0.352597    0.678231    11.00000   -1.20000 
H10B  2    0.353764    0.420220    0.576355    11.00000   -1.20000 
AFIX   0 
C11   1    0.238191    0.212775    0.302060    11.00000    0.01184    0.00934 = 
         0.01340   -0.00583    0.00025   -0.00331 
C12   1    0.256973    0.245620    0.197052    11.00000    0.01573    0.01242 = 
         0.01357   -0.00578    0.00063   -0.00432 
AFIX  23 
H12A  2    0.185629    0.307780    0.157156    11.00000   -1.20000 
H12B  2    0.330134    0.272429    0.184529    11.00000   -1.20000 
AFIX   0 
C13   1    0.272924    0.144665    0.171350    11.00000    0.02165    0.01436 = 
         0.01396   -0.00793    0.00099   -0.00513 
AFIX  13 
H13   2    0.286641    0.167608    0.103721    11.00000   -1.20000 
AFIX   0 
C14   1    0.157008    0.106832    0.186700    11.00000    0.02336    0.01435 = 
         0.01695   -0.00728   -0.00396   -0.00621 
AFIX  23 
H14A  2    0.166096    0.042163    0.170084    11.00000   -1.20000 
H14B  2    0.086162    0.168870    0.145937    11.00000   -1.20000 
AFIX   0 
C15   1    0.136106    0.072971    0.290604    11.00000    0.01868    0.01393 = 
         0.01803   -0.00727   -0.00086   -0.00746 
AFIX  13 
H15   2    0.060365    0.048601    0.300966    11.00000   -1.20000 
AFIX   0 
C16   1    0.120981    0.174504    0.316144    11.00000    0.01243    0.01357 = 
         0.01682   -0.00657    0.00079   -0.00548 
AFIX  23 
H16A  2    0.104833    0.153212    0.382492    11.00000   -1.20000 
H16B  2    0.050476    0.237337    0.275770    11.00000   -1.20000 
AFIX   0 
C17   1    0.348561    0.112708    0.363369    11.00000    0.01318    0.01205 = 
         0.01407   -0.00723    0.00013   -0.00232 
AFIX  23 
H17A  2    0.424080    0.135985    0.353520    11.00000   -1.20000 
H17B  2    0.336986    0.089928    0.430686    11.00000   -1.20000 
AFIX   0 
C18   1    0.361242    0.012466    0.337102    11.00000    0.01766    0.01165 = 
         0.01628   -0.00754   -0.00176   -0.00114 
AFIX  13 
H18   2    0.432285   -0.051498    0.377557    11.00000   -1.20000 
AFIX   0 
C19   1    0.382808    0.047127    0.233205    11.00000    0.02098    0.01666 = 
         0.01851   -0.01106    0.00168   -0.00227 
AFIX  23 
H19A  2    0.458067    0.070796    0.222841    11.00000   -1.20000 
H19B  2    0.393022   -0.017467    0.216320    11.00000   -1.20000 
AFIX   0 
C20   1    0.244862   -0.024550    0.352958    11.00000    0.02456    0.01170 = 
         0.01719   -0.00596   -0.00155   -0.00668 
AFIX  23 
H20A  2    0.253681   -0.089859    0.337268    11.00000   -1.20000 
H20B  2    0.231194   -0.047394    0.419903    11.00000   -1.20000 
AFIX   0 
REM  ------------------------------------------------------------- 
sadi c46 c47 c46 c47a 
sadi c47 c48 c47a c48a 
sadi c48 c49 c48a c49a 
sadi c49 s1 c49a s1a 
sadi s1 c46 s1a c46 
sadi 0.04 pd1 s1 pd1 s1a 
sadi 0.04 pd1 c47 pd1 c47a 
sadi 0.04 c46 c48 c46 c48a 
sadi 0.04 c46 c49 c46 c49a 
sadi 0.04 c47 c49 c47a c49a 
sadi 0.04 c47 s1 c47a s1a 
sadi 0.04 c48 s1 c48a s1a 
flat pd1 c46 c47 c48 c49 s1 
flat pd1 c46 c47a c48a c49a s1a 
C46   1    0.528365    0.283765    0.306653    11.00000    0.00996    0.01372 = 
         0.01735   -0.00631    0.00352   -0.00292 
part 1 
S1    5    0.577565    0.246605    0.217272    21.00000    0.01382    0.01955 = 
         0.01497   -0.00930    0.00283   -0.00188 
C47   1    0.609699    0.213429    0.388440    21.00000    0.01054    0.01591 = 
         0.01580   -0.00641    0.00163   -0.00334 
AFIX  43 
H47   2    0.600720    0.220594    0.446382    21.00000   -1.20000 
AFIX   0 
C48   1    0.707152    0.130130    0.377265    21.00000    0.01549    0.01529 = 
         0.01833   -0.00740   -0.00149   -0.00454 
AFIX  43 
H48   2    0.769311    0.076596    0.426389    21.00000   -1.20000 
AFIX   0 
C49   1    0.700830    0.136179    0.287599    21.00000    0.00912    0.01545 = 
         0.02304   -0.00979    0.00047    0.00176 
AFIX  43 
H49   2    0.756272    0.086746    0.266868    21.00000   -1.20000 
AFIX   0 
PART   2 
S1A   5    0.617765    0.208597    0.406788   -21.00000    0.01054    0.01591 = 
         0.01580   -0.00641    0.00163   -0.00334 
C47A  1    0.571244    0.243808    0.236227   -21.00000    0.01382    0.01955 = 
         0.01497   -0.00930    0.00283   -0.00188 
AFIX  43 
H47A  2    0.532442    0.275541    0.173548   -21.00000   -1.20000 
AFIX   0 
C48A  1    0.677637    0.152019    0.271586   -21.00000    0.00912    0.01545 = 
         0.02304   -0.00979    0.00047    0.00176 
AFIX  43 
H48A  2    0.721167    0.116025    0.235094   -21.00000   -1.20000 
AFIX   0 
C49A  1    0.710030    0.121594    0.363283   -21.00000    0.01549    0.01529 = 
         0.01833   -0.00740   -0.00149   -0.00454 
AFIX  43 
H49A  2    0.776773    0.058734    0.400030   -21.00000   -1.20000 
AFIX   0 
PART   0 
C21   1    0.094779    0.452775    0.265396    11.00000    0.00887    0.01078 = 
         0.01239   -0.00635    0.00079   -0.00222 
C22   1   -0.023198    0.441431    0.284754    11.00000    0.01081    0.01222 = 
         0.01394   -0.00678    0.00177   -0.00472 
C23   1   -0.127569    0.523725    0.230825    11.00000    0.00852    0.01539 = 
         0.01673   -0.00837    0.00132   -0.00341 
AFIX  43 
H23   2   -0.205202    0.511457    0.240935    11.00000   -1.20000 
AFIX   0 
C24   1   -0.118499    0.624172    0.161966    11.00000    0.01033    0.01519 = 
         0.01505   -0.00727   -0.00141   -0.00122 
AFIX  43 
H24   2   -0.189851    0.680385    0.124587    11.00000   -1.20000 
AFIX   0 
C25   1   -0.004955    0.642276    0.147866    11.00000    0.01228    0.01232 = 
         0.01184   -0.00597    0.00081   -0.00342 
C26   1    0.103153    0.555976    0.197164    11.00000    0.00901    0.01113 = 
         0.01167   -0.00664    0.00134   -0.00305 
C27   1   -0.142128    0.322718    0.373281    11.00000    0.01259    0.02029 = 
         0.02510   -0.00427    0.00327   -0.01000 
AFIX 137 
H27A  2   -0.202277    0.382362    0.383581    11.00000   -1.50000 
H27B  2   -0.130958    0.250975    0.427754    11.00000   -1.50000 
H27C  2   -0.171091    0.317283    0.316719    11.00000   -1.50000 
AFIX   0 
C28   1   -0.094796    0.838063    0.054840    11.00000    0.01791    0.01260 = 
         0.02014   -0.00336   -0.00258    0.00015 
AFIX 137 
H28A  2   -0.152572    0.830209    0.013449    11.00000   -1.50000 
H28B  2   -0.070617    0.906135    0.020303    11.00000   -1.50000 
H28C  2   -0.133539    0.843541    0.109409    11.00000   -1.50000 
AFIX   0 
O1    3   -0.027904    0.348413    0.361249    11.00000    0.00905    0.01425 = 
         0.01895   -0.00335    0.00224   -0.00561 
O2    3    0.010451    0.742479    0.085916    11.00000    0.01280    0.01099 = 
         0.01778   -0.00296    0.00087   -0.00197 
C31   1    0.218473    0.589329    0.169772    11.00000    0.00945    0.01008 = 
         0.01168   -0.00464    0.00154   -0.00336 
C32   1    0.250016    0.662666    0.204428    11.00000    0.01045    0.01194 = 
         0.01314   -0.00610    0.00195   -0.00404 
C33   1    0.321541    0.730214    0.154543    11.00000    0.01268    0.01285 = 
         0.01681   -0.00744    0.00287   -0.00542 
AFIX  43 
H33   2    0.342528    0.778374    0.178446    11.00000   -1.20000 
AFIX   0 
C34   1    0.362985    0.729296    0.071163    11.00000    0.01141    0.01177 = 
         0.01597   -0.00455    0.00341   -0.00377 
C35   1    0.331576    0.657718    0.036976    11.00000    0.01370    0.01317 = 
         0.01371   -0.00551    0.00438   -0.00383 
AFIX  43 
H35   2    0.360824    0.655380   -0.019353    11.00000   -1.20000 
AFIX   0 
C36   1    0.259167    0.590045    0.082558    11.00000    0.01096    0.01114 = 
         0.01139   -0.00471    0.00114   -0.00210 
C37   1    0.200063    0.678314    0.290037    11.00000    0.01394    0.01356 = 
         0.01410   -0.00799    0.00415   -0.00673 
AFIX  13 
H37   2    0.150988    0.624668    0.317459    11.00000   -1.20000 
AFIX   0 
C38   1    0.115218    0.797754    0.262127    11.00000    0.01714    0.01583 = 
         0.02155   -0.01087    0.00497   -0.00532 
AFIX 137 
H38A  2    0.159752    0.852319    0.230938    11.00000   -1.50000 
H38B  2    0.086639    0.806468    0.318609    11.00000   -1.50000 
H38C  2    0.045075    0.810759    0.219008    11.00000   -1.50000 
AFIX   0 
C39   1    0.303692    0.650912    0.366146    11.00000    0.01904    0.02131 = 
         0.01603   -0.00948    0.00137   -0.00839 
AFIX 137 
H39A  2    0.358342    0.575335    0.381648    11.00000   -1.50000 
H39B  2    0.268951    0.654146    0.422690    11.00000   -1.50000 
H39C  2    0.349706    0.705825    0.342517    11.00000   -1.50000 
AFIX   0 
C40   1    0.435414    0.807226    0.014359    11.00000    0.01998    0.01663 = 
         0.02122   -0.00872    0.01059   -0.00996 
AFIX  13 
H40   2    0.479976    0.774188   -0.027544    11.00000   -1.20000 
AFIX   0 
C41   1    0.530302    0.819897    0.074778    11.00000    0.02152    0.03193 = 
         0.03468   -0.00879    0.00663   -0.01892 
AFIX 137 
H41A  2    0.581201    0.862099    0.034069    11.00000   -1.50000 
H41B  2    0.581709    0.745355    0.117764    11.00000   -1.50000 
H41C  2    0.488885    0.860367    0.111270    11.00000   -1.50000 
AFIX   0 
C42   1    0.348532    0.921880   -0.048722    11.00000    0.03385    0.02196 = 
         0.03209    0.00371    0.00235   -0.01389 
AFIX 137 
H42A  2    0.288655    0.912155   -0.087159    11.00000   -1.50000 
H42B  2    0.395043    0.969003   -0.089879    11.00000   -1.50000 
H42C  2    0.306130    0.958076   -0.009617    11.00000   -1.50000 
AFIX   0 
C43   1    0.216345    0.525873    0.034327    11.00000    0.01546    0.01292 = 
         0.01235   -0.00651    0.00163   -0.00391 
AFIX  13 
H43   2    0.177492    0.472635    0.080767    11.00000   -1.20000 
AFIX   0 
C44   1    0.322806    0.456365    0.003144    11.00000    0.02150    0.01898 = 
         0.01929   -0.01206    0.00544   -0.00456 
AFIX 137 
H44A  2    0.353747    0.506909   -0.049988    11.00000   -1.50000 
H44B  2    0.294304    0.405428   -0.016069    11.00000   -1.50000 
H44C  2    0.388233    0.412447    0.055610    11.00000   -1.50000 
AFIX   0 
C45   1    0.119777    0.605780   -0.050460    11.00000    0.02446    0.02081 = 
         0.01786   -0.01003   -0.00436   -0.00170 
AFIX 137 
H45A  2    0.050931    0.647817   -0.029596    11.00000   -1.50000 
H45B  2    0.090993    0.562021   -0.078283    11.00000   -1.50000 
H45C  2    0.155894    0.658400   -0.097510    11.00000   -1.50000 
AFIX   0 
HKLF 4 
  
REM  14036 in P-1 
REM R1 =  0.0240 for   11274 Fo > 4sig(Fo)  and  0.0288 for all   12442 data 
REM    499 parameters refined using    198 restraints 
  
END 
  
WGHT      0.0249      1.8553 
  
REM Highest difference peak  0.693,  deepest hole -1.021,  1-sigma level  0.071 
Q1    1   0.5786  0.4301  0.2516  11.00000  0.05    0.69 
Q2    1   0.3636  0.4472  0.2128  11.00000  0.05    0.55 
Q3    1   0.4007  0.4229  0.3148  11.00000  0.05    0.55 
Q4    1   0.5763  0.2508  0.3517  11.00000  0.05    0.54 
Q5    1   0.6147  0.4443  0.2441  11.00000  0.05    0.51 
Q6    1   0.2417  0.2314  0.2455  11.00000  0.05    0.50 
Q7    1   0.2248  0.6361  0.1772  11.00000  0.05    0.50 
Q8    1   0.5832  0.4895  0.2988  11.00000  0.05    0.48 
Q9    1   0.3340  0.4713  0.2697  11.00000  0.05    0.47 
Q10   1   0.4621  0.3370  0.3206  11.00000  0.05    0.47 
Q11   1   0.2328  0.5954  0.1225  11.00000  0.05    0.47 
Q12   1   0.3387  0.7276  0.1145  11.00000  0.05    0.47 
Q13   1   0.1476  0.0871  0.2395  11.00000  0.05    0.46 
Q14   1   0.5250  0.5683  0.1700  11.00000  0.05    0.46 
Q15   1   0.0524  0.5929  0.1608  11.00000  0.05    0.46 
Q16   1   0.0945  0.5007  0.2313  11.00000  0.05    0.45 
Q17   1   0.4731  0.3614  0.2617  11.00000  0.05    0.45 
Q18   1  -0.0742  0.4729  0.2501  11.00000  0.05    0.45 
Q19   1   0.3442  0.3151  0.6011  11.00000  0.05    0.45 
Q20   1   0.2720  0.1919  0.1857  11.00000  0.05    0.44 
; 
_shelx_res_checksum   53993 
  
_shelx_hkl_file 
; 
  -1   0   0  173.79    3.69 
  -1   0   0  190.16    3.63 
  -1   0   0  180.36    3.82 
  -1   0   0  179.72    3.66 
  -1   0   0  188.94    3.88 
   1   0   0  182.07    3.66 
   1   0   0  182.21    3.62 
   1   0   0  179.31    3.74 
   1   0   0  180.89    3.76 
  -2   0   0   76.98    1.61 
  -2   0   0   74.19    1.62 
  -2   0   0   71.54    1.64 
  -2   0   0   78.15    1.68 
  -2   0   0   77.75    1.49 
  -2   0   0   77.40    1.69 
  -2   0   0   74.94    1.72 
   2   0   0   77.62    1.66 
   2   0   0   75.55    1.63 
   2   0   0   75.04    1.67 
   2   0   0   75.29    1.66 
   2   0   0   77.65    1.59 
   2   0   0   76.18    1.61 
   2   0   0   76.97    1.74 
  -3   0   0   15.17    0.49 
  -3   0   0   15.39    0.51 
  -3   0   0   14.79    0.46 
  -3   0   0   15.58    0.44 
  -3   0   0   15.28    0.47 
  -3   0   0   14.88    0.48 
  -3   0   0   15.44    0.36 
   3   0   0   15.22    0.49 
   3   0   0   15.28    0.45 
   3   0   0   15.01    0.51 
   3   0   0   16.22    0.48 
   3   0   0   15.79    0.48 
   3   0   0   16.19    0.51 
   3   0   0   15.07    0.47 
  -4   0   0  169.12    3.79 
  -4   0   0  168.34    3.63 
  -4   0   0  170.44    3.71 
  -4   0   0  166.22    3.72 
  -4   0   0  169.98    3.31 
  -4   0   0  172.17    3.59 
   4   0   0  168.59    3.66 
   4   0   0  173.99    3.73 
   4   0   0  172.34    3.59 
   4   0   0  168.58    3.69 
   4   0   0  165.69    3.66 
   4   0   0  170.36    3.52 
   4   0   0  171.11    3.85 
  -5   0   0  114.34    2.58 
  -5   0   0  112.04    2.61 
  -5   0   0  116.73    2.75 
  -5   0   0  116.44    2.56 
  -5   0   0  113.75    2.67 
  -5   0   0  118.79    2.30 
  -5   0   0  116.10    2.61 
   5   0   0  121.22    2.67 
   5   0   0  115.99    2.67 
   5   0   0  114.80    2.58 
   5   0   0  115.28    2.62 
   5   0   0  117.53    2.78 
   5   0   0  116.60    2.51 
   5   0   0  117.34    2.64 
  -6   0   0   43.90    1.21 
  -6   0   0   45.26    1.26 
  -6   0   0   48.82    1.23 
  -6   0   0   46.24    1.15 
  -6   0   0   44.29    1.26 
  -6   0   0   46.51    0.97 
  -6   0   0   45.74    1.34 
   6   0   0   46.26    1.25 
   6   0   0   44.76    1.23 
   6   0   0   44.77    1.17 
   6   0   0   44.44    1.28 
   6   0   0   45.11    1.33 
   6   0   0   46.67    1.24 
   6   0   0   46.35    1.23 
  -7   0   0   18.16    0.81 
  -7   0   0   19.06    0.75 
  -7   0   0   18.20    0.71 
  -7   0   0   17.61    0.70 
  -7   0   0   18.49    0.76 
  -7   0   0   17.68    0.59 
   7   0   0   18.51    0.78 
   7   0   0   18.80    0.68 
   7   0   0   18.74    0.80 
   7   0   0   18.72    0.74 
   7   0   0   19.25    0.71 
   7   0   0   18.66    0.72 
   7   0   0   18.88    0.73 
  -8   0   0   33.42    1.20 
  -8   0   0   32.68    1.12 
  -8   0   0   31.13    0.90 
  -8   0   0   31.85    1.10 
   8   0   0   31.94    1.14 
   8   0   0   32.65    1.11 
   8   0   0   34.47    1.19 
   8   0   0   32.10    1.06 
   8   0   0   33.61    1.08 
   8   0   0   34.08    1.03 
  -9   0   0   11.95    0.74 
  -9   0   0   10.15    0.76 
  -9   0   0   12.45    0.74 
   9   0   0   12.76    0.67 
   9   0   0   11.88    0.73 
   9   0   0   12.24    0.66 
   9   0   0   12.34    0.70 
   9   0   0   11.57    0.74 
   9   0   0   11.50    0.74 
 -10   0   0    0.19    0.38 
 -10   0   0    0.77    0.47 
 -10   0   0    0.25    0.36 
  10   0   0    0.37    0.39 
  10   0   0    0.52    0.41 
  10   0   0    0.48    0.33 
  10   0   0    0.40    0.36 
  10   0   0    0.56    0.35 
  10   0   0    0.07    0.33 
 -11   0   0    0.93    0.45 
 -11   0   0    1.17    0.52 
 -11   0   0    0.51    0.41 
  11   0   0    1.14    0.40 
  11   0   0    1.20    0.40 
  11   0   0    1.09    0.49 
  11   0   0    1.50    0.44 
  11   0   0    0.90    0.37 
  11   0   0    0.84    0.46 
 -12   0   0    7.70    0.80 
 -12   0   0    8.69    0.92 
 -12   0   0    7.74    0.77 
  12   0   0    8.54    0.85 
  12   0   0    7.90    0.69 
  12   0   0    7.66    0.81 
  12   0   0    8.22    0.73 
  12   0   0    8.12    0.73 
  12   0   0    6.83    0.77 
 -13   0   0   21.26    1.31 
 -13   0   0   24.20    1.27 
 -13   0   0   20.45    1.18 
  13   0   0   18.71    1.14 
  13   0   0   21.55    1.19 
  13   0   0   21.58    1.10 
  13   0   0   19.87    1.19 
  13   0   0   20.70    1.07 
 -14   0   0   24.60    1.50 
 -14   0   0   27.41    1.39 
 -14   0   0   28.38    1.47 
  14   0   0   26.95    1.41 
  14   0   0   28.00    1.41 
  14   0   0   28.71    1.28 
  14   0   0   26.81    1.39 
  14   0   0   27.49    1.27 
 -15   0   0    2.23    0.74 
 -15   0   0    2.75    0.69 
 -15   0   0    2.73    0.78 
  15   0   0    3.07    0.75 
  15   0   0    4.26    0.81 
  15   0   0    3.34    0.78 
  15   0   0    3.04    0.60 
  15   0   0    3.96    0.68 
  15  -1   0   11.48    1.14 
  15  -1   0   12.86    1.13 
  15  -1   0   10.83    0.92 
  15  -1   0   11.67    0.92 
 -15   1   0    8.92    1.00 
 -15   1   0    9.68    1.10 
 -15   1   0    9.71    1.07 
  14  -1   0   28.51    1.43 
  14  -1   0   28.81    1.32 
  14  -1   0   29.63    1.48 
  14  -1   0   31.31    1.34 
 -14   1   0   29.23    1.60 
 -14   1   0   31.89    1.49 
 -14   1   0   30.93    1.55 
  13  -1   0    3.97    0.60 
  13  -1   0    3.14    0.69 
  13  -1   0    1.56    0.56 
  13  -1   0    3.69    0.66 
  13  -1   0    3.71    0.61 
  13  -1   0    2.93    0.60 
 -13   1   0    2.92    0.62 
 -13   1   0    2.15    0.62 
 -13   1   0    3.31    0.77 
  12  -1   0    0.32    0.50 
  12  -1   0   -0.05    0.39 
  12  -1   0   -0.06    0.40 
  12  -1   0   -0.24    0.43 
  12  -1   0    0.05    0.40 
  12  -1   0    0.11    0.34 
 -12   1   0   -0.37    0.50 
 -12   1   0    0.66    0.50 
 -12   1   0   -0.36    0.40 
  11  -1   0    0.06    0.35 
  11  -1   0    0.06    0.34 
  11  -1   0   -0.11    0.36 
  11  -1   0   -0.43    0.36 
  11  -1   0    0.34    0.46 
  11  -1   0    0.27    0.36 
 -11   1   0    0.64    0.50 
 -11   1   0    0.88    0.40 
 -11   1   0    0.11    0.44 
  10  -1   0   20.55    0.95 
  10  -1   0   21.31    1.03 
  10  -1   0   20.15    0.98 
  10  -1   0   20.84    1.00 
  10  -1   0   21.11    0.91 
  10  -1   0   20.73    0.93 
 -10   1   0   21.49    1.01 
 -10   1   0   21.14    1.01 
 -10   1   0   20.37    1.07 
   9  -1   0    0.48    0.38 
   9  -1   0    0.43    0.33 
   9  -1   0    0.77    0.31 
   9  -1   0    0.51    0.31 
   9  -1   0    0.55    0.37 
   9  -1   0    0.87    0.36 
  -9   1   0   -0.05    0.33 
  -9   1   0    0.69    0.40 
  -9   1   0    0.16    0.34 
   8  -1   0    2.59    0.40 
   8  -1   0    1.94    0.38 
   8  -1   0    2.51    0.34 
   8  -1   0    2.12    0.41 
   8  -1   0    1.75    0.34 
   8  -1   0    1.69    0.39 
  -8   1   0    2.34    0.40 
  -8   1   0    1.82    0.42 
  -8   1   0    2.51    0.42 
   7  -1   0   68.76    1.70 
   7  -1   0   67.97    1.83 
   7  -1   0   68.51    1.81 
   7  -1   0   71.12    1.91 
   7  -1   0   71.58    1.77 
   7  -1   0   69.35    1.83 
  -7   1   0   68.86    1.49 
  -7   1   0   64.97    1.81 
  -7   1   0   71.23    1.94 
  -7   1   0   71.39    1.82 
  -7   1   0   67.46    1.59 
  -7   1   0   70.33    1.77 
  -7   1   0   71.23    1.78 
   6  -1   0   90.62    2.07 
   6  -1   0   91.48    2.20 
   6  -1   0   93.93    2.20 
   6  -1   0   92.04    2.13 
   6  -1   0   90.47    2.21 
   6  -1   0   90.90    2.19 
   6  -1   0   91.07    2.28 
  -6   1   0   91.25    2.17 
  -6   1   0   88.64    2.11 
  -6   1   0   89.57    2.21 
  -6   1   0   87.72    2.12 
  -6   1   0   86.39    2.01 
  -6   1   0   91.42    1.89 
  -6   1   0   89.51    2.30 
   5  -1   0  141.04    3.20 
   5  -1   0  137.11    3.08 
   5  -1   0  136.92    2.91 
   5  -1   0  136.82    3.09 
   5  -1   0  135.29    2.98 
   5  -1   0  133.05    3.06 
   5  -1   0  137.18    3.05 
  -5   1   0  138.49    2.97 
  -5   1   0  134.69    3.03 
  -5   1   0  136.96    2.74 
  -5   1   0  135.18    3.18 
  -5   1   0  130.93    3.09 
  -5   1   0  136.22    2.98 
  -5   1   0  133.62    2.96 
   4  -1   0    0.16    0.16 
   4  -1   0    0.53    0.19 
   4  -1   0   -0.08    0.14 
   4  -1   0    0.28    0.18 
   4  -1   0    0.36    0.14 
   4  -1   0    0.38    0.17 
   4  -1   0    0.38    0.17 
  -4   1   0    0.36    0.13 
  -4   1   0    0.35    0.16 
  -4   1   0    0.15    0.14 
  -4   1   0    0.43    0.19 
  -4   1   0    0.30    0.10 
  -4   1   0    0.38    0.09 
  -4   1   0    0.21    0.18 
   3  -1   0    2.94    0.25 
   3  -1   0    2.45    0.23 
   3  -1   0    2.45    0.23 
   3  -1   0    2.12    0.20 
   3  -1   0    2.01    0.18 
   3  -1   0    2.63    0.24 
   3  -1   0    2.66    0.22 
  -3   1   0    1.86    0.19 
  -3   1   0    2.45    0.17 
  -3   1   0    2.00    0.20 
  -3   1   0    2.62    0.25 
  -3   1   0    1.92    0.11 
  -3   1   0    2.15    0.24 
  -3   1   0    2.12    0.19 
   2  -1   0    3.10    0.21 
   2  -1   0    3.41    0.23 
   2  -1   0    2.79    0.20 
   2  -1   0    3.01    0.20 
   2  -1   0    2.93    0.20 
   2  -1   0    3.14    0.22 
   2  -1   0    3.06    0.19 
  -2   1   0    3.19    0.19 
  -2   1   0    2.87    0.19 
  -2   1   0    2.68    0.21 
  -2   1   0    2.88    0.20 
  -2   1   0    2.88    0.16 
  -2   1   0    2.99    0.22 
   1  -1   0  143.70    2.94 
   1  -1   0  148.23    2.85 
   1  -1   0  138.45    3.01 
   1  -1   0  136.20    2.97 
   1  -1   0  142.35    3.04 
   1  -1   0  140.04    2.87 
   1  -1   0  144.69    2.94 
   1  -1   0  143.47    3.03 
   1  -1   0  139.07    3.00 
  -1   1   0  137.84    2.77 
  -1   1   0  136.68    2.90 
  -1   1   0  141.62    2.85 
  -1   1   0  141.04    3.02 
  -1   1   0  139.96    2.87 
  -1   1   0  137.45    2.99 
   0  -1   0  650.09   13.18 
   0  -1   0  655.34   13.03 
   0  -1   0  658.47   13.56 
   0  -1   0  670.46   13.03 
   0  -1   0  662.98   13.78 
   0   1   0  658.83   13.03 
   0   1   0  634.09   13.55 
   0   1   0  652.74   13.21 
   0   1   0  662.53   13.29 
   0   1   0  645.20   13.94 
  -1  -1   0   34.72    0.77 
  -1  -1   0   33.05    0.73 
  -1  -1   0   33.98    0.75 
  -1  -1   0   34.87    0.82 
  -1  -1   0   34.94    0.74 
   1   1   0   35.37    0.81 
   1   1   0   34.43    0.75 
   1   1   0   34.42    0.73 
   1   1   0   34.36    0.75 
   1   1   0   33.08    0.78 
  -2  -1   0  107.54    2.35 
  -2  -1   0  104.12    2.20 
  -2  -1   0  107.45    2.17 
  -2  -1   0  103.19    2.28 
  -2  -1   0  102.36    2.30 
  -2  -1   0  101.97    2.21 
   2   1   0  103.19    2.27 
   2   1   0  103.88    2.16 
   2   1   0  102.82    2.21 
   2   1   0  104.28    2.29 
   2   1   0  105.95    2.23 
   2   1   0  104.58    2.20 
   2   1   0  108.35    2.04 
   2   1   0  108.92    2.37 
   2   1   0  107.87    2.24 
  -3  -1   0    9.74    0.39 
  -3  -1   0   10.13    0.38 
  -3  -1   0   10.15    0.36 
  -3  -1   0   10.22    0.37 
  -3  -1   0    9.69    0.37 
  -3  -1   0    9.70    0.37 
   3   1   0    9.86    0.37 
   3   1   0   10.29    0.41 
   3   1   0    9.95    0.34 
   3   1   0    9.91    0.36 
   3   1   0   10.49    0.38 
   3   1   0   10.35    0.41 
  -4  -1   0   43.20    1.12 
  -4  -1   0   46.05    1.13 
  -4  -1   0   44.57    1.16 
  -4  -1   0   43.96    1.10 
  -4  -1   0   43.44    1.11 
  -4  -1   0   44.42    1.08 
   4   1   0   44.60    1.10 
   4   1   0   44.91    1.16 
   4   1   0   45.83    1.12 
   4   1   0   44.20    1.20 
   4   1   0   43.92    1.05 
   4   1   0   43.15    1.11 
  -5  -1   0   42.36    1.14 
  -5  -1   0   42.17    1.11 
  -5  -1   0   43.26    1.13 
  -5  -1   0   42.43    1.14 
  -5  -1   0   41.80    1.19 
  -5  -1   0   43.34    1.10 
   5   1   0   42.32    1.06 
   5   1   0   43.79    1.14 
   5   1   0   43.12    1.12 
   5   1   0   43.01    1.18 
   5   1   0   42.03    1.22 
   5   1   0   43.37    1.13 
  -6  -1   0   12.69    0.57 
  -6  -1   0   13.24    0.52 
  -6  -1   0   14.18    0.55 
  -6  -1   0   12.73    0.62 
  -6  -1   0   13.17    0.55 
  -6  -1   0   12.70    0.58 
   6   1   0   12.65    0.61 
   6   1   0   12.69    0.57 
   6   1   0   12.71    0.61 
   6   1   0   13.39    0.58 
   6   1   0   14.06    0.53 
   6   1   0   13.81    0.55 
  -7  -1   0   10.85    0.58 
  -7  -1   0   10.64    0.62 
  -7  -1   0   11.67    0.54 
  -7  -1   0   10.30    0.53 
  -7  -1   0   11.74    0.59 
  -7  -1   0   11.22    0.50 
   7   1   0   11.28    0.53 
   7   1   0   10.83    0.61 
   7   1   0   11.54    0.58 
   7   1   0   11.79    0.57 
   7   1   0   12.02    0.53 
   7   1   0   11.17    0.62 
  -8  -1   0    0.50    0.30 
  -8  -1   0    0.44    0.33 
  -8  -1   0    0.68    0.25 
  -8  -1   0    0.16    0.26 
  -8  -1   0    0.56    0.22 
   8   1   0    0.29    0.32 
   8   1   0    0.27    0.26 
   8   1   0    0.50    0.30 
   8   1   0    0.69    0.30 
   8   1   0    0.41    0.24 
  -9  -1   0   17.84    0.84 
  -9  -1   0   17.54    0.69 
  -9  -1   0   17.15    0.91 
  -9  -1   0   17.95    0.85 
   9   1   0   17.92    0.84 
   9   1   0   17.00    0.87 
   9   1   0   16.49    0.80 
   9   1   0   18.06    0.77 
   9   1   0   18.74    0.88 
 -10  -1   0    5.66    0.58 
 -10  -1   0    6.23    0.68 
 -10  -1   0    5.83    0.62 
  10   1   0    6.30    0.55 
  10   1   0    5.53    0.54 
  10   1   0    5.76    0.63 
  10   1   0    5.64    0.64 
  10   1   0    5.38    0.64 
 -11  -1   0    1.70    0.56 
 -11  -1   0    1.70    0.49 
 -11  -1   0    2.84    0.53 
  11   1   0    1.64    0.50 
  11   1   0    1.92    0.44 
  11   1   0    1.94    0.46 
  11   1   0    1.28    0.46 
  11   1   0    1.50    0.52 
 -12  -1   0   29.49    1.42 
 -12  -1   0   27.70    1.29 
 -12  -1   0   30.62    1.32 
  12   1   0   29.37    1.29 
  12   1   0   28.69    1.33 
  12   1   0   30.27    1.36 
  12   1   0   28.52    1.22 
  12   1   0   30.31    1.18 
 -13  -1   0   31.67    1.53 
 -13  -1   0   27.05    1.34 
 -13  -1   0   31.58    1.40 
  13   1   0   30.12    1.24 
  13   1   0   29.80    1.28 
  13   1   0   30.34    1.42 
  13   1   0   29.49    1.34 
  13   1   0   30.20    1.43 
 -14  -1   0    4.56    0.85 
 -14  -1   0    4.68    0.77 
 -14  -1   0    4.61    0.74 
  14   1   0    3.47    0.70 
  14   1   0    5.06    0.66 
  14   1   0    4.24    0.69 
  14   1   0    3.91    0.74 
  14   1   0    4.88    0.77 
 -15  -1   0   17.92    1.37 
 -15  -1   0   19.00    1.34 
  15   1   0   18.48    1.21 
  15   1   0   19.43    1.14 
  15   1   0   17.45    1.09 
  15   1   0   17.85    1.28 
  15   1   0   18.05    1.25 
  14  -2   0    9.76    1.05 
  14  -2   0   10.10    0.90 
  14  -2   0    9.84    0.98 
  14  -2   0    9.15    0.86 
 -14   2   0   10.22    1.04 
 -14   2   0    8.83    0.94 
 -14   2   0    9.27    1.09 
  13  -2   0    0.50    0.52 
  13  -2   0    0.47    0.43 
  13  -2   0    1.29    0.56 
  13  -2   0    0.41    0.45 
  13  -2   0    1.03    0.60 
 -13   2   0    1.14    0.53 
 -13   2   0    0.60    0.62 
 -13   2   0    0.33    0.53 
  12  -2   0    0.12    0.37 
  12  -2   0    0.15    0.45 
  12  -2   0    0.75    0.55 
  12  -2   0   -0.07    0.43 
  12  -2   0    0.55    0.43 
  12  -2   0   -0.23    0.41 
 -12   2   0    0.52    0.47 
 -12   2   0    0.00    0.54 
 -12   2   0    0.35    0.50 
  11  -2   0    1.07    0.44 
  11  -2   0    0.67    0.40 
  11  -2   0    0.60    0.50 
  11  -2   0    0.30    0.37 
  11  -2   0    0.59    0.38 
  11  -2   0    0.47    0.38 
 -11   2   0    0.50    0.42 
 -11   2   0    0.41    0.48 
 -11   2   0    0.69    0.47 
  10  -2   0    1.74    0.52 
  10  -2   0    1.15    0.38 
  10  -2   0    1.17    0.42 
  10  -2   0    0.92    0.37 
  10  -2   0    1.34    0.40 
  10  -2   0    1.19    0.45 
 -10   2   0    1.33    0.45 
 -10   2   0    1.32    0.44 
 -10   2   0    1.88    0.51 
   9  -2   0    3.71    0.48 
   9  -2   0    3.43    0.52 
   9  -2   0    3.34    0.43 
   9  -2   0    3.72    0.55 
   9  -2   0    4.00    0.52 
   9  -2   0    3.25    0.50 
  -9   2   0    3.15    0.46 
  -9   2   0    3.17    0.55 
  -9   2   0    3.37    0.50 
   8  -2   0   23.65    0.95 
   8  -2   0   23.57    0.86 
   8  -2   0   22.61    0.96 
   8  -2   0   22.52    0.93 
   8  -2   0   23.24    0.94 
   8  -2   0   23.50    0.89 
  -8   2   0   23.19    0.71 
  -8   2   0   21.99    0.93 
  -8   2   0   21.67    1.00 
  -8   2   0   24.27    0.97 
   7  -2   0   67.16    1.79 
   7  -2   0   66.79    1.82 
   7  -2   0   67.09    1.67 
   7  -2   0   65.81    1.79 
   7  -2   0   66.91    1.72 
   7  -2   0   64.66    1.78 
  -7   2   0   65.83    1.77 
  -7   2   0   66.15    1.72 
  -7   2   0   65.71    1.50 
  -7   2   0   65.14    1.89 
  -7   2   0   66.94    1.79 
   6  -2   0   66.12    1.60 
   6  -2   0   66.43    1.65 
   6  -2   0   65.00    1.71 
   6  -2   0   67.14    1.75 
   6  -2   0   66.38    1.71 
   6  -2   0   63.26    1.71 
   6  -2   0   69.96    1.72 
  -6   2   0   63.99    1.48 
  -6   2   0   65.33    1.81 
  -6   2   0   64.88    1.71 
  -6   2   0   65.21    1.65 
  -6   2   0   65.04    1.69 
   5  -2   0    9.23    0.48 
   5  -2   0    9.31    0.50 
   5  -2   0    9.37    0.46 
   5  -2   0    9.24    0.45 
   5  -2   0    9.21    0.43 
   5  -2   0    9.48    0.49 
   5  -2   0   10.31    0.47 
  -5   2   0    9.30    0.47 
  -5   2   0    9.66    0.45 
  -5   2   0    9.77    0.46 
  -5   2   0    9.24    0.49 
  -5   2   0    9.30    0.37 
  -5   2   0    8.81    0.52 
   4  -2   0    2.87    0.27 
   4  -2   0    3.26    0.32 
   4  -2   0    3.67    0.31 
   4  -2   0    3.35    0.32 
   4  -2   0    2.01    0.21 
   4  -2   0    2.65    0.26 
   4  -2   0    3.97    0.36 
  -4   2   0    2.69    0.22 
  -4   2   0    3.30    0.34 
  -4   2   0    2.17    0.23 
  -4   2   0    2.63    0.25 
  -4   2   0    2.51    0.27 
  -4   2   0    3.39    0.31 
   3  -2   0   37.09    0.92 
   3  -2   0   37.12    0.95 
   3  -2   0   35.52    0.98 
   3  -2   0   35.46    0.96 
   3  -2   0   37.82    0.96 
   3  -2   0   37.15    0.95 
   3  -2   0   35.54    0.88 
  -3   2   0   37.17    0.92 
  -3   2   0   35.44    0.99 
  -3   2   0   36.93    0.88 
  -3   2   0   36.18    0.94 
  -3   2   0   36.05    0.95 
  -3   2   0   36.78    0.93 
   2  -2   0  264.86    5.61 
   2  -2   0  263.16    5.30 
   2  -2   0  265.83    5.68 
   2  -2   0  270.19    5.62 
   2  -2   0  259.31    5.50 
   2  -2   0  268.24    5.51 
   2  -2   0  263.87    5.56 
   2  -2   0  261.45    5.37 
  -2   2   0  264.23    5.18 
  -2   2   0  263.22    5.42 
  -2   2   0  259.76    5.60 
  -2   2   0  263.19    5.33 
  -2   2   0  259.73    5.37 
  -2   2   0  259.68    5.65 
   1  -2   0   50.67    1.20 
   1  -2   0   51.50    1.19 
   1  -2   0   50.19    1.13 
   1  -2   0   51.55    1.20 
   1  -2   0   50.41    1.15 
   1  -2   0   51.22    1.18 
   1  -2   0   53.61    1.20 
   1  -2   0   52.36    1.19 
   1  -2   0   51.62    1.16 
  -1   2   0   51.64    1.19 
  -1   2   0   50.48    1.15 
  -1   2   0   49.88    1.18 
  -1   2   0   50.89    1.18 
  -1   2   0   52.07    1.13 
  -1   2   0   52.05    1.14 
  -1   2   0   49.54    1.15 
   0  -2   0    6.79    0.26 
   0  -2   0    7.04    0.25 
   0  -2   0    7.30    0.24 
   0  -2   0    6.51    0.29 
   0  -2   0    6.89    0.25 
   0  -2   0    6.70    0.27 
   0   2   0    6.66    0.25 
   0   2   0    6.99    0.22 
   0   2   0    6.90    0.26 
   0   2   0    6.93    0.24 
   0   2   0    7.05    0.25 
   0   2   0    6.87    0.23 
   0   2   0    7.30    0.25 
  -1  -2   0   26.31    0.62 
  -1  -2   0   25.20    0.60 
  -1  -2   0   26.14    0.62 
  -1  -2   0   25.75    0.69 
  -1  -2   0   26.19    0.64 
  -1  -2   0   26.80    0.64 
  -1  -2   0   27.07    0.62 
   1   2   0   26.28    0.62 
   1   2   0   26.31    0.61 
   1   2   0   25.25    0.64 
   1   2   0   27.06    0.66 
   1   2   0   26.08    0.60 
   1   2   0   26.01    0.61 
   1   2   0   25.43    0.64 
  -2  -2   0   75.04    1.70 
  -2  -2   0   76.57    1.72 
  -2  -2   0   79.13    1.82 
  -2  -2   0   79.17    1.65 
  -2  -2   0   77.17    1.68 
  -2  -2   0   78.38    1.72 
   2   2   0   77.36    1.67 
   2   2   0   76.64    1.73 
   2   2   0   75.38    1.73 
   2   2   0   77.20    1.63 
   2   2   0   78.40    1.80 
   2   2   0   78.64    1.57 
   2   2   0   76.41    1.67 
  -3  -2   0    9.42    0.38 
  -3  -2   0    9.70    0.37 
  -3  -2   0    9.61    0.38 
  -3  -2   0    9.93    0.41 
  -3  -2   0    9.83    0.38 
  -3  -2   0   10.20    0.39 
  -3  -2   0    9.60    0.36 
   3   2   0   10.83    0.42 
   3   2   0    9.28    0.38 
   3   2   0   10.05    0.28 
   3   2   0    9.29    0.29 
   3   2   0   10.20    0.39 
   3   2   0    9.96    0.42 
   3   2   0    9.95    0.36 
   3   2   0    9.56    0.36 
   3   2   0    9.63    0.34 
  -4  -2   0  105.68    2.44 
  -4  -2   0  104.84    2.37 
  -4  -2   0  106.48    2.37 
  -4  -2   0  107.91    2.33 
  -4  -2   0  114.33    2.54 
  -4  -2   0  106.93    2.47 
   4   2   0  107.02    2.33 
   4   2   0  105.23    2.55 
   4   2   0  106.47    2.30 
   4   2   0  110.79    2.38 
   4   2   0  109.13    2.12 
   4   2   0  109.17    2.47 
   4   2   0  104.99    2.38 
   4   2   0  111.70    2.45 
  -5  -2   0    5.01    0.35 
  -5  -2   0    5.12    0.36 
  -5  -2   0    4.73    0.33 
  -5  -2   0    4.90    0.38 
  -5  -2   0    4.96    0.36 
  -5  -2   0    4.83    0.35 
   5   2   0    5.08    0.36 
   5   2   0    5.27    0.33 
   5   2   0    5.18    0.39 
   5   2   0    4.97    0.32 
   5   2   0    4.87    0.34 
   5   2   0    4.49    0.27 
   5   2   0    5.27    0.41 
  -6  -2   0   -0.01    0.19 
  -6  -2   0    0.44    0.21 
  -6  -2   0    0.61    0.23 
  -6  -2   0    0.40    0.19 
  -6  -2   0    0.00    0.21 
  -6  -2   0    0.20    0.23 
   6   2   0    0.67    0.19 
   6   2   0    0.64    0.24 
   6   2   0    0.15    0.25 
   6   2   0    0.37    0.22 
   6   2   0    0.37    0.16 
   6   2   0    0.59    0.19 
   6   2   0    0.35    0.22 
  -7  -2   0   42.11    1.32 
  -7  -2   0   44.30    1.22 
  -7  -2   0   44.81    1.27 
  -7  -2   0   41.62    1.25 
  -7  -2   0   43.02    1.24 
  -7  -2   0   44.21    1.29 
   7   2   0   45.29    1.26 
   7   2   0   44.41    1.16 
   7   2   0   43.62    1.17 
   7   2   0   41.98    1.31 
   7   2   0   44.30    1.38 
   7   2   0   46.56    1.25 
   7   2   0   44.12    1.25 
  -8  -2   0    0.20    0.28 
  -8  -2   0    0.26    0.24 
  -8  -2   0    0.22    0.21 
  -8  -2   0    0.05    0.27 
  -8  -2   0   -0.02    0.22 
  -8  -2   0   -0.07    0.29 
   8   2   0    0.22    0.18 
   8   2   0    0.41    0.24 
   8   2   0    0.14    0.31 
   8   2   0    0.32    0.28 
   8   2   0    0.22    0.27 
   8   2   0    0.35    0.30 
  -9  -2   0    2.63    0.45 
  -9  -2   0    3.42    0.48 
  -9  -2   0    3.41    0.53 
  -9  -2   0    3.43    0.41 
   9   2   0    3.24    0.37 
   9   2   0    2.95    0.48 
   9   2   0    2.77    0.46 
   9   2   0    2.85    0.44 
   9   2   0    2.73    0.42 
   9   2   0    3.56    0.41 
 -10  -2   0   13.25    0.79 
 -10  -2   0   12.67    0.87 
 -10  -2   0   13.06    0.80 
  10   2   0   12.79    0.76 
  10   2   0   13.09    0.86 
  10   2   0   12.78    0.82 
  10   2   0   14.24    0.81 
  10   2   0   13.59    0.66 
  10   2   0   13.02    0.71 
 -11  -2   0   28.50    1.28 
 -11  -2   0   27.87    1.20 
 -11  -2   0   26.59    1.17 
  11   2   0   28.18    1.06 
  11   2   0   25.87    1.23 
  11   2   0   28.43    1.17 
  11   2   0   27.09    1.22 
  11   2   0   26.97    1.01 
  11   2   0   29.11    1.16 
 -12  -2   0   62.19    2.09 
 -12  -2   0   61.61    1.96 
 -12  -2   0   61.33    1.97 
  12   2   0   59.23    2.01 
  12   2   0   60.91    1.77 
  12   2   0   61.55    1.88 
  12   2   0   57.93    2.05 
  12   2   0   59.77    1.91 
 -13  -2   0    8.10    0.84 
 -13  -2   0    7.15    0.79 
 -13  -2   0    7.52    0.89 
  13   2   0    7.37    0.81 
  13   2   0    7.80    0.87 
  13   2   0    5.97    0.67 
  13   2   0    7.45    0.69 
  13   2   0    7.04    0.82 
 -14  -2   0    7.31    0.84 
 -14  -2   0    7.42    0.98 
 -14  -2   0    6.38    0.79 
  14   2   0    7.82    0.73 
  14   2   0    8.07    0.94 
  14   2   0    7.19    0.84 
  14   2   0    7.12    0.78 
  14   2   0    6.85    0.92 
 -15  -2   0   20.22    1.42 
 -15  -2   0   19.51    1.33 
 -15  -2   0   18.75    1.26 
 -15  -2   0   19.17    1.29 
  15   2   0   16.53    1.26 
  15   2   0   18.12    1.19 
  15   2   0   18.66    1.15 
  15   2   0   19.66    1.09 
  15   2   0   18.42    1.26 
  14  -3   0    0.70    0.46 
  14  -3   0   -0.45    0.53 
  14  -3   0    0.73    0.65 
  14  -3   0    0.29    0.53 
  14  -3   0    0.75    0.54 
 -14   3   0   -0.15    0.56 
 -14   3   0   -0.01    0.57 
 -14   3   0    0.05    0.66 
  13  -3   0    2.60    0.53 
  13  -3   0    3.28    0.71 
  13  -3   0    2.96    0.67 
  13  -3   0    2.39    0.59 
  13  -3   0    3.62    0.76 
 -13   3   0    2.12    0.77 
 -13   3   0    2.67    0.64 
 -13   3   0    3.88    0.72 
  12  -3   0    1.12    0.46 
  12  -3   0    1.21    0.53 
  12  -3   0    0.89    0.56 
  12  -3   0    0.15    0.38 
  12  -3   0    0.35    0.46 
 -12   3   0    1.23    0.54 
 -12   3   0    0.55    0.53 
 -12   3   0    0.62    0.60 
  11  -3   0    0.08    0.39 
  11  -3   0    0.83    0.42 
  11  -3   0    0.79    0.38 
  11  -3   0    0.47    0.51 
  11  -3   0    0.46    0.46 
 -11   3   0    0.91    0.54 
 -11   3   0    0.00    0.43 
 -11   3   0    0.69    0.46 
  10  -3   0    5.20    0.69 
  10  -3   0    4.21    0.54 
  10  -3   0    4.72    0.56 
  10  -3   0    4.67    0.52 
  10  -3   0    5.44    0.64 
  10  -3   0    4.07    0.62 
 -10   3   0    5.58    0.72 
 -10   3   0    5.08    0.65 
 -10   3   0    4.04    0.58 
   9  -3   0    9.46    0.74 
   9  -3   0    9.40    0.69 
   9  -3   0    8.91    0.67 
   9  -3   0    8.52    0.62 
   9  -3   0    9.77    0.76 
   9  -3   0    9.82    0.66 
  -9   3   0   10.25    0.75 
  -9   3   0   10.07    0.78 
  -9   3   0    9.68    0.84 
   8  -3   0  118.57    2.80 
   8  -3   0  118.64    2.94 
   8  -3   0  118.62    3.00 
   8  -3   0  121.48    2.99 
   8  -3   0  122.65    3.03 
   8  -3   0  119.78    2.83 
  -8   3   0  116.62    2.59 
  -8   3   0  119.67    3.00 
  -8   3   0  121.84    2.94 
  -8   3   0  116.55    3.11 
   7  -3   0   69.41    1.77 
   7  -3   0   74.48    1.92 
   7  -3   0   70.54    1.91 
   7  -3   0   70.50    1.93 
   7  -3   0   71.12    1.88 
   7  -3   0   70.94    1.81 
  -7   3   0   70.58    1.65 
  -7   3   0   67.53    1.99 
  -7   3   0   67.04    1.89 
  -7   3   0   71.12    1.88 
   6  -3   0   45.53    1.29 
   6  -3   0   43.19    1.31 
   6  -3   0   44.98    1.21 
   6  -3   0   46.51    1.25 
   6  -3   0   43.20    1.32 
   6  -3   0   47.78    1.31 
  -6   3   0   43.68    1.26 
  -6   3   0   44.55    1.14 
  -6   3   0   45.02    1.31 
  -6   3   0   43.28    1.23 
  -6   3   0   44.36    1.38 
  -6   3   0   46.19    1.31 
   5  -3   0   14.22    0.65 
   5  -3   0   16.45    0.58 
   5  -3   0   15.93    0.63 
   5  -3   0   15.38    0.61 
   5  -3   0   15.86    0.61 
   5  -3   0   15.68    0.65 
   5  -3   0   14.94    0.59 
  -5   3   0   15.40    0.60 
  -5   3   0   15.72    0.68 
  -5   3   0   16.24    0.64 
  -5   3   0   15.97    0.55 
  -5   3   0   15.52    0.65 
  -5   3   0   15.55    0.61 
   4  -3   0    0.63    0.23 
   4  -3   0    0.40    0.20 
   4  -3   0    0.22    0.17 
   4  -3   0    0.60    0.18 
   4  -3   0    0.25    0.21 
   4  -3   0    0.27    0.16 
   4  -3   0    0.59    0.18 
  -4   3   0    0.45    0.19 
  -4   3   0    0.04    0.15 
  -4   3   0    0.46    0.18 
  -4   3   0    0.33    0.22 
  -4   3   0    0.44    0.22 
  -4   3   0    0.34    0.15 
   3  -3   0  533.45   10.51 
   3  -3   0  521.16   11.25 
   3  -3   0  539.03   11.11 
   3  -3   0  513.60   10.62 
   3  -3   0  531.63   10.89 
   3  -3   0  528.78   10.88 
   3  -3   0  534.45   11.16 
   3  -3   0  518.22   10.98 
  -3   3   0  535.85   10.24 
  -3   3   0  525.45   11.18 
  -3   3   0  530.92   10.56 
  -3   3   0  500.02   10.87 
  -3   3   0  515.55   10.64 
  -3   3   0  525.69   10.72 
  -3   3   0  517.03   11.10 
   2  -3   0  430.64    9.08 
   2  -3   0  425.09    9.04 
   2  -3   0  434.41    8.81 
   2  -3   0  432.51    8.52 
   2  -3   0  426.41    8.98 
   2  -3   0  427.79    8.81 
   2  -3   0  424.35    8.89 
   2  -3   0  439.39    9.07 
  -2   3   0  417.59    8.81 
  -2   3   0  414.70    9.01 
  -2   3   0  420.09    8.30 
  -2   3   0  426.11    8.53 
  -2   3   0  411.04    8.60 
  -2   3   0  414.28    8.96 
  -2   3   0  421.61    8.66 
  -2   3   0  416.81    8.96 
   1  -3   0  243.38    5.02 
   1  -3   0  244.44    5.25 
   1  -3   0  242.33    5.18 
   1  -3   0  252.89    5.32 
   1  -3   0  246.35    5.25 
   1  -3   0  242.47    5.02 
   1  -3   0  252.63    5.26 
   1  -3   0  254.41    5.16 
   1  -3   0  242.18    4.98 
  -1   3   0  237.94    5.22 
  -1   3   0  241.68    5.05 
  -1   3   0  239.03    5.02 
  -1   3   0  244.81    4.97 
  -1   3   0  242.84    4.87 
  -1   3   0  244.79    5.24 
  -1   3   0  243.59    5.17 
   0  -3   0   47.75    1.13 
   0  -3   0   47.97    1.11 
   0  -3   0   47.54    1.18 
   0  -3   0   48.64    1.12 
   0  -3   0   47.89    1.14 
   0  -3   0   47.98    1.11 
   0  -3   0   44.63    1.17 
   0   3   0   46.20    1.12 
   0   3   0   48.39    1.10 
   0   3   0   48.02    1.10 
   0   3   0   48.02    1.14 
   0   3   0   47.33    1.08 
   0   3   0   48.02    1.11 
  -1  -3   0    3.11    0.24 
  -1  -3   0    2.87    0.25 
  -1  -3   0    2.58    0.19 
  -1  -3   0    3.14    0.24 
  -1  -3   0    2.81    0.22 
  -1  -3   0    3.01    0.20 
  -1  -3   0    3.22    0.23 
   1   3   0    2.74    0.20 
   1   3   0    2.78    0.21 
   1   3   0    2.85    0.22 
   1   3   0    2.71    0.20 
   1   3   0    2.55    0.19 
   1   3   0    3.04    0.21 
   1   3   0    2.70    0.19 
  -2  -3   0   13.62    0.41 
  -2  -3   0   13.53    0.45 
  -2  -3   0   13.07    0.37 
  -2  -3   0   13.62    0.43 
  -2  -3   0   13.11    0.45 
  -2  -3   0   13.73    0.52 
  -2  -3   0   13.35    0.43 
   2   3   0   13.39    0.46 
   2   3   0   13.19    0.42 
   2   3   0   13.47    0.45 
   2   3   0   13.13    0.41 
   2   3   0   13.34    0.42 
   2   3   0   13.50    0.43 
   2   3   0   13.40    0.47 
  -3  -3   0  175.51    3.88 
  -3  -3   0  164.42    3.66 
  -3  -3   0  168.21    3.72 
  -3  -3   0  169.07    3.60 
  -3  -3   0  170.08    3.72 
  -3  -3   0  172.05    3.54 
   3   3   0  174.88    3.40 
   3   3   0  170.16    3.60 
   3   3   0  168.58    3.71 
   3   3   0  169.97    3.55 
   3   3   0  169.57    3.60 
   3   3   0  172.74    3.85 
   3   3   0  170.53    3.52 
   3   3   0  175.85    3.73 
  -4  -3   0  171.77    3.69 
  -4  -3   0  168.56    3.69 
  -4  -3   0  170.86    3.76 
  -4  -3   0  176.55    3.64 
  -4  -3   0  170.09    3.82 
  -4  -3   0  179.90    3.98 
  -4  -3   0  173.39    3.84 
   4   3   0  174.12    3.72 
   4   3   0  172.06    3.82 
   4   3   0  177.10    3.82 
   4   3   0  173.70    3.64 
   4   3   0  176.61    3.70 
   4   3   0  174.44    3.73 
   4   3   0  170.47    3.60 
   4   3   0  174.54    3.97 
   4   3   0  174.14    3.43 
  -5  -3   0  106.11    2.50 
  -5  -3   0   98.72    2.38 
  -5  -3   0  101.53    2.32 
  -5  -3   0  100.45    2.36 
  -5  -3   0   98.68    2.40 
  -5  -3   0  103.46    2.28 
  -5  -3   0  101.17    2.32 
   5   3   0  103.11    2.32 
   5   3   0  103.92    2.37 
   5   3   0  100.78    2.31 
   5   3   0  104.94    2.52 
   5   3   0   99.94    2.41 
   5   3   0  103.41    2.05 
   5   3   0   99.65    2.22 
   5   3   0  100.94    2.23 
  -6  -3   0    1.13    0.27 
  -6  -3   0    1.45    0.25 
  -6  -3   0    1.17    0.28 
  -6  -3   0    1.52    0.30 
  -6  -3   0    2.06    0.31 
  -6  -3   0    1.72    0.27 
  -6  -3   0    1.60    0.28 
   6   3   0    1.37    0.11 
   6   3   0    1.41    0.26 
   6   3   0    1.21    0.31 
   6   3   0    1.69    0.24 
   6   3   0    1.71    0.30 
   6   3   0    1.57    0.19 
   6   3   0    1.80    0.24 
   6   3   0    1.22    0.26 
  -7  -3   0    3.96    0.40 
  -7  -3   0    4.13    0.41 
  -7  -3   0    4.09    0.43 
  -7  -3   0    4.17    0.42 
  -7  -3   0    3.88    0.37 
  -7  -3   0    4.35    0.44 
  -7  -3   0    5.06    0.47 
   7   3   0    4.14    0.36 
   7   3   0    4.74    0.42 
   7   3   0    3.95    0.39 
   7   3   0    4.55    0.39 
   7   3   0    4.61    0.51 
   7   3   0    4.60    0.30 
   7   3   0    4.01    0.45 
  -8  -3   0    6.44    0.50 
  -8  -3   0    6.18    0.52 
  -8  -3   0    6.84    0.48 
  -8  -3   0    6.16    0.53 
  -8  -3   0    5.92    0.50 
  -8  -3   0    7.65    0.62 
   8   3   0    5.86    0.58 
   8   3   0    6.92    0.61 
   8   3   0    5.99    0.45 
   8   3   0    6.49    0.37 
   8   3   0    5.59    0.49 
   8   3   0    6.70    0.53 
  -9  -3   0   -0.05    0.30 
  -9  -3   0    0.74    0.35 
  -9  -3   0    0.06    0.35 
  -9  -3   0    0.57    0.30 
   9   3   0    0.46    0.36 
   9   3   0    0.19    0.30 
   9   3   0    0.73    0.32 
   9   3   0    0.21    0.20 
   9   3   0    0.02    0.29 
   9   3   0    0.37    0.26 
 -10  -3   0    6.18    0.61 
 -10  -3   0    6.49    0.63 
 -10  -3   0    7.00    0.61 
 -10  -3   0    6.88    0.72 
  10   3   0    4.92    0.55 
  10   3   0    7.70    0.58 
  10   3   0    6.82    0.70 
  10   3   0    7.39    0.66 
  10   3   0    5.69    0.45 
  10   3   0    5.46    0.64 
 -11  -3   0   61.15    1.88 
 -11  -3   0   62.93    2.00 
 -11  -3   0   64.27    1.92 
  11   3   0   63.19    1.86 
  11   3   0   62.44    1.98 
  11   3   0   56.43    1.99 
  11   3   0   60.57    1.72 
  11   3   0   60.03    1.83 
 -12  -3   0   40.66    1.55 
 -12  -3   0   42.14    1.59 
 -12  -3   0   42.61    1.64 
 -12  -3   0   42.87    1.57 
  12   3   0   42.35    1.40 
  12   3   0   42.47    1.63 
  12   3   0   40.31    1.66 
  12   3   0   42.92    1.51 
  12   3   0   42.22    1.52 
 -13  -3   0   -0.12    0.47 
 -13  -3   0   -0.09    0.49 
 -13  -3   0    0.05    0.55 
 -13  -3   0    0.52    0.48 
  13   3   0    0.32    0.49 
  13   3   0   -0.15    0.47 
  13   3   0    0.30    0.53 
  13   3   0   -0.17    0.39 
  13   3   0    0.17    0.39 
 -14  -3   0    4.59    0.82 
 -14  -3   0    3.96    0.75 
 -14  -3   0    2.51    0.64 
 -14  -3   0    3.45    0.68 
  14   3   0    3.66    0.69 
  14   3   0    2.91    0.62 
  14   3   0    3.48    0.59 
  14   3   0    4.28    0.75 
  14   3   0    3.20    0.74 
 -15  -3   0   12.60    1.23 
 -15  -3   0   17.09    1.27 
 -15  -3   0   13.85    1.20 
 -15  -3   0   16.18    1.18 
  15   3   0   12.23    1.08 
  15   3   0   14.22    1.25 
  15   3   0   13.89    1.04 
  15   3   0   13.61    0.97 
  15   3   0   15.04    1.22 
 -16  -3   0   22.55    1.47 
 -16  -3   0   23.14    1.40 
 -16  -3   0   19.70    1.49 
  16   3   0   21.76    1.23 
  16   3   0   21.75    1.49 
  16   3   0   21.10    1.29 
  16   3   0   21.30    1.16 
  16   3   0   19.80    1.34 
  13  -4   0    8.80    0.99 
  13  -4   0    9.34    0.84 
  13  -4   0    8.70    0.92 
  13  -4   0    8.65    1.01 
  13  -4   0    8.25    0.83 
 -13   4   0    9.08    0.94 
 -13   4   0    9.60    1.08 
 -13   4   0    9.83    1.02 
  12  -4   0    1.57    0.60 
  12  -4   0    1.15    0.46 
  12  -4   0    1.40    0.56 
  12  -4   0    1.59    0.61 
  12  -4   0    1.48    0.50 
 -12   4   0    0.92    0.51 
 -12   4   0    2.29    0.59 
 -12   4   0    0.50    0.60 
  11  -4   0    0.07    0.35 
  11  -4   0    0.24    0.50 
  11  -4   0    0.98    0.43 
  11  -4   0   -0.24    0.41 
  11  -4   0    0.39    0.53 
 -11   4   0    0.71    0.54 
 -11   4   0   -0.73    0.39 
 -11   4   0   -0.75    0.42 
  10  -4   0    0.65    0.50 
  10  -4   0    0.03    0.35 
  10  -4   0    0.43    0.39 
  10  -4   0   -0.16    0.43 
  10  -4   0    0.55    0.36 
 -10   4   0    0.58    0.43 
 -10   4   0    1.05    0.51 
 -10   4   0    0.44    0.45 
   9  -4   0   38.69    1.33 
   9  -4   0   37.71    1.27 
   9  -4   0   39.14    1.44 
   9  -4   0   34.98    1.40 
   9  -4   0   38.06    1.29 
   9  -4   0   39.57    1.36 
  -9   4   0   39.14    1.38 
  -9   4   0   36.63    1.47 
  -9   4   0   39.06    1.41 
   8  -4   0   50.14    1.53 
   8  -4   0   51.00    1.52 
   8  -4   0   49.58    1.46 
   8  -4   0   50.09    1.62 
   8  -4   0   47.53    1.58 
   8  -4   0   51.54    1.47 
  -8   4   0   50.13    1.58 
  -8   4   0   49.01    1.33 
  -8   4   0   52.57    1.70 
  -8   4   0   48.25    1.55 
   7  -4   0    6.50    0.62 
   7  -4   0    5.04    0.56 
   7  -4   0    5.21    0.46 
   7  -4   0    5.56    0.49 
   7  -4   0    5.50    0.55 
   7  -4   0    5.66    0.49 
  -7   4   0    5.26    0.39 
  -7   4   0    5.53    0.51 
  -7   4   0    5.67    0.54 
  -7   4   0    5.24    0.59 
   6  -4   0   35.67    1.06 
   6  -4   0   36.74    1.14 
   6  -4   0   35.20    1.17 
   6  -4   0   36.11    1.10 
   6  -4   0   38.10    1.11 
   6  -4   0   34.75    1.20 
  -6   4   0   35.85    1.12 
  -6   4   0   35.26    1.15 
  -6   4   0   36.00    1.23 
  -6   4   0   36.47    1.17 
  -6   4   0   36.93    1.03 
   5  -4   0   51.57    1.47 
   5  -4   0   52.35    1.39 
   5  -4   0   52.50    1.52 
   5  -4   0   54.37    1.37 
   5  -4   0   53.35    1.45 
   5  -4   0   54.51    1.42 
   5  -4   0   56.38    1.47 
  -5   4   0   51.24    1.46 
  -5   4   0   52.84    1.44 
  -5   4   0   55.32    1.36 
  -5   4   0   51.72    1.40 
  -5   4   0   53.24    1.53 
  -5   4   0   53.16    1.45 
   4  -4   0    5.88    0.34 
   4  -4   0    6.71    0.40 
   4  -4   0    5.73    0.44 
   4  -4   0    6.60    0.38 
   4  -4   0    5.77    0.38 
   4  -4   0    6.17    0.42 
   4  -4   0    5.87    0.43 
  -4   4   0    6.33    0.38 
  -4   4   0    5.98    0.40 
  -4   4   0    5.82    0.42 
  -4   4   0    5.63    0.42 
  -4   4   0    6.03    0.39 
  -4   4   0    6.56    0.39 
  -4   4   0    5.78    0.39 
   3  -4   0   93.89    2.14 
   3  -4   0   96.87    2.23 
   3  -4   0   98.36    2.12 
   3  -4   0   92.61    2.20 
   3  -4   0   92.19    2.16 
   3  -4   0   95.32    2.23 
   3  -4   0   94.27    2.13 
   3  -4   0   94.93    2.27 
  -3   4   0   92.33    2.21 
  -3   4   0   93.23    2.14 
  -3   4   0   95.12    2.16 
  -3   4   0   93.10    2.14 
  -3   4   0   95.35    2.11 
  -3   4   0   93.00    2.25 
  -3   4   0   89.94    2.19 
   2  -4   0  321.14    6.60 
   2  -4   0  326.60    6.55 
   2  -4   0  316.20    6.77 
   2  -4   0  323.41    6.93 
   2  -4   0  326.74    6.91 
   2  -4   0  326.79    6.89 
   2  -4   0  327.49    6.95 
   2  -4   0  323.93    6.84 
  -2   4   0  313.59    6.87 
  -2   4   0  323.60    6.65 
  -2   4   0  313.53    6.40 
  -2   4   0  314.62    6.87 
  -2   4   0  320.28    6.79 
  -2   4   0  316.23    6.91 
  -2   4   0  317.67    6.55 
  -2   4   0  320.36    6.61 
   1  -4   0  371.84    7.87 
   1  -4   0  387.83    8.02 
   1  -4   0  379.24    7.83 
   1  -4   0  373.61    7.64 
   1  -4   0  370.42    7.97 
   1  -4   0  359.62    7.98 
   1  -4   0  386.66    8.12 
   1  -4   0  376.78    7.58 
   1  -4   0  373.04    7.64 
  -1   4   0  376.72    7.56 
  -1   4   0  370.35    7.96 
  -1   4   0  375.53    7.85 
  -1   4   0  370.72    7.65 
  -1   4   0  363.49    7.94 
  -1   4   0  379.75    7.69 
  -1   4   0  370.94    7.40 
   0  -4   0    2.06    0.23 
   0  -4   0    1.61    0.24 
   0  -4   0    2.02    0.24 
   0  -4   0    2.38    0.26 
   0  -4   0    1.88    0.21 
   0  -4   0    2.24    0.24 
   0  -4   0    2.22    0.22 
   0   4   0    1.92    0.21 
   0   4   0    2.18    0.23 
   0   4   0    1.78    0.20 
   0   4   0    2.17    0.18 
   0   4   0    1.82    0.20 
   0   4   0    2.36    0.25 
   0   4   0    2.01    0.20 
  -1  -4   0    1.78    0.20 
  -1  -4   0    1.80    0.25 
  -1  -4   0    1.59    0.21 
  -1  -4   0    1.38    0.20 
  -1  -4   0    1.55    0.20 
  -1  -4   0    1.37    0.21 
  -1  -4   0    1.69    0.25 
   1   4   0    1.33    0.17 
   1   4   0    1.41    0.19 
   1   4   0    1.46    0.18 
   1   4   0    1.58    0.20 
   1   4   0    1.69    0.17 
   1   4   0    1.52    0.20 
   1   4   0    1.42    0.18 
  -2  -4   0    8.96    0.34 
  -2  -4   0    8.96    0.38 
  -2  -4   0    9.75    0.39 
  -2  -4   0    9.58    0.46 
  -2  -4   0    9.38    0.40 
  -2  -4   0    9.59    0.33 
  -2  -4   0    9.73    0.39 
   2   4   0    9.76    0.37 
   2   4   0    9.49    0.39 
   2   4   0    9.33    0.36 
   2   4   0    9.27    0.36 
   2   4   0    9.96    0.39 
   2   4   0    9.20    0.38 
   2   4   0    8.92    0.40 
  -3  -4   0    4.81    0.31 
  -3  -4   0    4.85    0.41 
  -3  -4   0    4.87    0.23 
  -3  -4   0    5.18    0.32 
  -3  -4   0    5.02    0.34 
  -3  -4   0    4.95    0.27 
  -3  -4   0    4.66    0.30 
   3   4   0    5.10    0.30 
   3   4   0    4.87    0.34 
   3   4   0    5.85    0.35 
   3   4   0    4.51    0.30 
   3   4   0    5.13    0.34 
   3   4   0    5.42    0.28 
   3   4   0    4.96    0.29 
  -4  -4   0   14.41    0.51 
  -4  -4   0   15.27    0.57 
  -4  -4   0   14.86    0.56 
  -4  -4   0   14.84    0.56 
  -4  -4   0   15.74    0.65 
  -4  -4   0   15.00    0.53 
  -4  -4   0   14.82    0.53 
   4   4   0   15.20    0.47 
   4   4   0   14.88    0.61 
   4   4   0   14.30    0.60 
   4   4   0   16.42    0.55 
   4   4   0   15.21    0.41 
   4   4   0   15.01    0.55 
   4   4   0   15.18    0.57 
   4   4   0   15.28    0.52 
  -5  -4   0    4.10    0.37 
  -5  -4   0    3.98    0.31 
  -5  -4   0    4.19    0.35 
  -5  -4   0    3.74    0.40 
  -5  -4   0    3.50    0.33 
  -5  -4   0    3.81    0.35 
  -5  -4   0    3.89    0.33 
   5   4   0    3.05    0.19 
   5   4   0    3.75    0.30 
   5   4   0    3.49    0.38 
   5   4   0    4.46    0.37 
   5   4   0    3.40    0.21 
   5   4   0    4.39    0.42 
   5   4   0    3.83    0.34 
   5   4   0    4.45    0.32 
  -6  -4   0    5.11    0.39 
  -6  -4   0    4.64    0.40 
  -6  -4   0    5.42    0.41 
  -6  -4   0    6.29    0.53 
  -6  -4   0    5.05    0.41 
  -6  -4   0    5.25    0.38 
  -6  -4   0    5.47    0.44 
   6   4   0    5.30    0.42 
   6   4   0    4.89    0.38 
   6   4   0    5.15    0.23 
   6   4   0    5.48    0.48 
   6   4   0    5.79    0.37 
   6   4   0    5.04    0.26 
   6   4   0    5.73    0.46 
   6   4   0    5.81    0.45 
   6   4   0    5.30    0.35 
  -7  -4   0    8.34    0.51 
  -7  -4   0    9.11    0.55 
  -7  -4   0    9.55    0.58 
  -7  -4   0    9.30    0.55 
  -7  -4   0    8.72    0.50 
  -7  -4   0    8.76    0.54 
  -7  -4   0    8.37    0.51 
   7   4   0    9.38    0.60 
   7   4   0    8.57    0.59 
   7   4   0    8.75    0.46 
   7   4   0    8.87    0.56 
   7   4   0    7.98    0.49 
   7   4   0    8.45    0.28 
   7   4   0    9.57    0.49 
   7   4   0    8.60    0.36 
  -8  -4   0    2.70    0.39 
  -8  -4   0    1.41    0.36 
  -8  -4   0    2.15    0.35 
  -8  -4   0    2.62    0.44 
  -8  -4   0    1.66    0.36 
  -8  -4   0    2.09    0.39 
  -8  -4   0    2.23    0.37 
   8   4   0    2.56    0.46 
   8   4   0    2.12    0.24 
   8   4   0    2.67    0.34 
   8   4   0    1.81    0.34 
   8   4   0    1.95    0.42 
   8   4   0    1.99    0.35 
  -9  -4   0   13.21    0.75 
  -9  -4   0   14.50    0.77 
  -9  -4   0   15.74    0.80 
  -9  -4   0   15.64    0.81 
  -9  -4   0   15.03    0.81 
   9   4   0   15.17    0.85 
   9   4   0   14.12    0.78 
   9   4   0   14.36    0.56 
   9   4   0   14.67    0.69 
   9   4   0   14.04    0.72 
   9   4   0   13.38    0.81 
 -10  -4   0   98.29    2.59 
 -10  -4   0   94.82    2.52 
 -10  -4   0   95.80    2.64 
 -10  -4   0   95.95    2.59 
 -10  -4   0   98.98    2.62 
  10   4   0   98.38    2.67 
  10   4   0   95.71    2.74 
  10   4   0   97.90    2.51 
  10   4   0   95.94    2.36 
  10   4   0   98.47    2.50 
 -11  -4   0   60.65    1.97 
 -11  -4   0   62.26    1.89 
 -11  -4   0   61.48    1.90 
 -11  -4   0   62.29    1.93 
 -11  -4   0   61.80    1.89 
  11   4   0   62.58    1.84 
  11   4   0   62.55    2.00 
  11   4   0   61.34    1.72 
  11   4   0   59.29    1.84 
  11   4   0   60.80    2.05 
 -12  -4   0    8.54    0.80 
 -12  -4   0    7.69    0.78 
 -12  -4   0    8.72    0.87 
 -12  -4   0    8.85    0.84 
  12   4   0    7.31    0.81 
  12   4   0    7.28    0.71 
  12   4   0    8.00    0.66 
  12   4   0    7.73    0.84 
  12   4   0    8.45    0.78 
 -13  -4   0    0.27    0.50 
 -13  -4   0    0.30    0.55 
 -13  -4   0    0.60    0.49 
 -13  -4   0    0.94    0.50 
  13   4   0    0.84    0.55 
  13   4   0    0.16    0.42 
  13   4   0    0.41    0.55 
  13   4   0    1.20    0.53 
  13   4   0    0.30    0.39 
 -14  -4   0    9.06    0.90 
 -14  -4   0    9.88    1.04 
 -14  -4   0   10.36    0.99 
 -14  -4   0   11.04    0.98 
  14   4   0    8.63    0.99 
  14   4   0    8.29    0.81 
  14   4   0    9.99    0.93 
  14   4   0    9.10    0.98 
  14   4   0    9.99    0.80 
 -15  -4   0   36.93    1.68 
 -15  -4   0   35.06    1.62 
 -15  -4   0   34.71    1.66 
 -15  -4   0   34.85    1.72 
  15   4   0   35.78    1.69 
  15   4   0   32.08    1.37 
  15   4   0   32.33    1.71 
  15   4   0   33.72    1.50 
  15   4   0   34.02    1.50 
 -16  -4   0   45.06    2.03 
  16   4   0   47.10    1.98 
  16   4   0   46.99    1.69 
  16   4   0   49.77    1.84 
  16   4   0   44.34    2.05 
  13  -5   0    0.31    0.49 
  13  -5   0    0.21    0.45 
  13  -5   0    0.58    0.67 
  13  -5   0    0.27    0.57 
  13  -5   0   -0.65    0.50 
 -13   5   0   -0.32    0.49 
 -13   5   0   -0.28    0.61 
 -13   5   0   -0.31    0.50 
 -13   5   0    0.15    0.62 
  12  -5   0    3.94    0.61 
  12  -5   0    3.85    0.68 
  12  -5   0    3.04    0.60 
  12  -5   0    2.41    0.74 
  12  -5   0    4.14    0.79 
 -12   5   0    3.19    0.77 
 -12   5   0    4.44    0.73 
 -12   5   0    4.08    0.68 
 -12   5   0    4.68    0.72 
  11  -5   0    4.55    0.75 
  11  -5   0    4.62    0.62 
  11  -5   0    4.43    0.76 
  11  -5   0    3.83    0.66 
  11  -5   0    3.79    0.56 
 -11   5   0    4.62    0.67 
 -11   5   0    4.02    0.63 
 -11   5   0    3.10    0.64 
 -11   5   0    3.99    0.78 
  10  -5   0    3.04    0.56 
  10  -5   0    2.38    0.46 
  10  -5   0    2.64    0.65 
  10  -5   0    4.43    0.72 
  10  -5   0    2.98    0.57 
 -10   5   0    4.54    0.74 
 -10   5   0    3.57    0.61 
 -10   5   0    2.66    0.58 
 -10   5   0    4.51    0.61 
   9  -5   0   56.99    1.91 
   9  -5   0   58.27    1.94 
   9  -5   0   58.02    1.74 
   9  -5   0   59.17    1.83 
   9  -5   0   58.96    1.75 
  -9   5   0   62.87    1.92 
  -9   5   0   61.33    1.89 
  -9   5   0   57.62    1.98 
  -9   5   0   63.75    1.86 
   8  -5   0   87.48    2.24 
   8  -5   0   84.04    2.43 
   8  -5   0   89.89    2.37 
   8  -5   0   88.43    2.44 
   8  -5   0   87.11    2.26 
  -8   5   0   87.36    2.51 
  -8   5   0   88.08    2.36 
  -8   5   0   89.51    2.36 
  -8   5   0   85.17    2.39 
  -8   5   0   84.66    2.12 
   7  -5   0   20.64    0.99 
   7  -5   0   21.09    0.86 
   7  -5   0   21.42    1.00 
   7  -5   0   20.60    0.86 
   7  -5   0   21.52    0.83 
   7  -5   0   21.53    0.92 
  -7   5   0   21.82    0.94 
  -7   5   0   20.02    0.97 
  -7   5   0   21.78    0.94 
  -7   5   0   20.57    0.79 
  -7   5   0   21.23    0.91 
   6  -5   0    4.22    0.40 
   6  -5   0    3.74    0.51 
   6  -5   0    4.45    0.44 
   6  -5   0    3.18    0.48 
   6  -5   0    3.84    0.41 
   6  -5   0    3.44    0.44 
  -6   5   0    3.28    0.42 
  -6   5   0    3.76    0.46 
  -6   5   0    3.93    0.43 
  -6   5   0    3.83    0.39 
  -6   5   0    3.95    0.50 
   5  -5   0    0.75    0.32 
   5  -5   0    0.69    0.23 
   5  -5   0    0.60    0.28 
   5  -5   0    0.71    0.26 
   5  -5   0    0.48    0.23 
   5  -5   0    0.61    0.33 
  -5   5   0    0.13    0.22 
  -5   5   0    0.65    0.22 
  -5   5   0    1.18    0.34 
  -5   5   0    0.37    0.26 
  -5   5   0    0.84    0.31 
  -5   5   0    0.40    0.22 
  -5   5   0    1.06    0.28 
   4  -5   0   60.81    1.57 
   4  -5   0   61.54    1.49 
   4  -5   0   57.70    1.58 
   4  -5   0   58.65    1.57 
   4  -5   0   58.42    1.38 
   4  -5   0   57.59    1.46 
   4  -5   0   57.23    1.50 
   4  -5   0   55.53    1.61 
  -4   5   0   56.42    1.50 
  -4   5   0   57.10    1.59 
  -4   5   0   58.17    1.52 
  -4   5   0   57.00    1.48 
  -4   5   0   58.30    1.56 
  -4   5   0   58.54    1.54 
  -4   5   0   58.51    1.55 
   3  -5   0   70.35    1.76 
   3  -5   0   69.10    1.77 
   3  -5   0   69.25    1.78 
   3  -5   0   69.68    1.70 
   3  -5   0   68.73    1.65 
   3  -5   0   70.49    1.82 
   3  -5   0   71.90    1.67 
   3  -5   0   71.26    1.68 
  -3   5   0   68.81    1.75 
  -3   5   0   67.95    1.70 
  -3   5   0   68.63    1.70 
  -3   5   0   68.58    1.77 
  -3   5   0   71.12    1.73 
  -3   5   0   68.66    1.76 
  -3   5   0   67.94    1.69 
   2  -5   0   61.39    1.54 
   2  -5   0   58.35    1.45 
   2  -5   0   59.21    1.45 
   2  -5   0   59.91    1.47 
   2  -5   0   60.13    1.38 
   2  -5   0   58.66    1.51 
   2  -5   0   58.11    1.45 
   2  -5   0   58.12    1.53 
   2  -5   0   59.43    1.52 
  -2   5   0   59.00    1.46 
  -2   5   0   59.34    1.46 
  -2   5   0   56.18    1.47 
  -2   5   0   58.66    1.48 
  -2   5   0   55.89    1.44 
  -2   5   0   58.38    1.44 
  -2   5   0   57.98    1.52 
  -2   5   0   57.39    1.48 
   1  -5   0   19.16    0.68 
   1  -5   0   18.34    0.53 
   1  -5   0   16.99    0.62 
   1  -5   0   17.64    0.62 
   1  -5   0   17.77    0.61 
   1  -5   0   18.69    0.67 
   1  -5   0   16.37    0.64 
  -1   5   0   18.38    0.64 
  -1   5   0   19.49    0.61 
  -1   5   0   18.36    0.63 
  -1   5   0   18.08    0.66 
  -1   5   0   17.85    0.61 
  -1   5   0   17.91    0.61 
  -1   5   0   18.50    0.59 
   0  -5   0    4.52    0.35 
   0  -5   0    4.40    0.36 
   0  -5   0    4.69    0.30 
   0  -5   0    4.66    0.33 
   0  -5   0    4.36    0.35 
   0  -5   0    4.45    0.34 
   0  -5   0    4.21    0.35 
   0   5   0    4.44    0.33 
   0   5   0    4.34    0.30 
   0   5   0    4.86    0.26 
   0   5   0    3.92    0.30 
   0   5   0    4.76    0.29 
   0   5   0    4.42    0.31 
   0   5   0    4.31    0.31 
  -1  -5   0    1.93    0.23 
  -1  -5   0    1.62    0.27 
  -1  -5   0    1.75    0.26 
  -1  -5   0    1.69    0.23 
  -1  -5   0    1.86    0.26 
  -1  -5   0    2.26    0.30 
  -1  -5   0    2.08    0.24 
   1   5   0    1.41    0.21 
   1   5   0    1.79    0.21 
   1   5   0    1.75    0.22 
   1   5   0    1.79    0.25 
   1   5   0    1.59    0.19 
   1   5   0    1.27    0.20 
   1   5   0    2.10    0.23 
  -2  -5   0   28.20    0.90 
  -2  -5   0   27.24    0.80 
  -2  -5   0   27.34    0.76 
  -2  -5   0   26.94    0.78 
  -2  -5   0   26.69    0.73 
  -2  -5   0   26.91    0.79 
  -2  -5   0   26.36    0.79 
   2   5   0   27.23    0.79 
   2   5   0   26.34    0.73 
   2   5   0   27.00    0.81 
   2   5   0   26.71    0.78 
   2   5   0   26.03    0.75 
   2   5   0   27.94    0.78 
   2   5   0   27.94    0.79 
  -3  -5   0   11.97    0.48 
  -3  -5   0   11.83    0.51 
  -3  -5   0   12.59    0.49 
  -3  -5   0   12.11    0.45 
  -3  -5   0   11.85    0.41 
  -3  -5   0   12.88    0.52 
  -3  -5   0   11.96    0.59 
   3   5   0   12.33    0.51 
   3   5   0   12.46    0.47 
   3   5   0   12.70    0.48 
   3   5   0   11.99    0.47 
   3   5   0   11.68    0.46 
   3   5   0   11.57    0.52 
   3   5   0   12.44    0.52 
  -4  -5   0   25.50    0.76 
  -4  -5   0   25.76    0.82 
  -4  -5   0   25.23    0.67 
  -4  -5   0   26.48    0.95 
  -4  -5   0   26.85    0.79 
  -4  -5   0   25.57    0.80 
  -4  -5   0   27.38    0.83 
   4   5   0   27.01    0.80 
   4   5   0   24.81    0.85 
   4   5   0   27.39    0.87 
   4   5   0   26.25    0.79 
   4   5   0   26.07    0.82 
   4   5   0   26.51    0.74 
   4   5   0   26.41    0.77 
   4   5   0   25.54    0.65 
  -5  -5   0  122.25    2.74 
  -5  -5   0  120.32    2.71 
  -5  -5   0  125.10    2.83 
  -5  -5   0  124.03    2.83 
  -5  -5   0  120.37    2.78 
  -5  -5   0  118.21    2.83 
  -5  -5   0  124.84    3.04 
   5   5   0  126.22    2.98 
   5   5   0  121.01    2.68 
   5   5   0  126.27    2.85 
   5   5   0  122.72    2.57 
   5   5   0  122.39    2.61 
   5   5   0  119.98    2.77 
   5   5   0  121.21    2.89 
   5   5   0  121.61    2.78 
  -6  -5   0   37.92    1.13 
  -6  -5   0   37.45    1.12 
  -6  -5   0   38.36    1.11 
  -6  -5   0   38.12    1.08 
  -6  -5   0   39.66    1.28 
  -6  -5   0   37.23    1.09 
  -6  -5   0   37.94    1.14 
   6   5   0   38.48    1.21 
   6   5   0   38.06    1.22 
   6   5   0   37.34    1.04 
   6   5   0   37.44    1.13 
   6   5   0   37.62    0.93 
   6   5   0   37.76    1.12 
   6   5   0   37.58    0.91 
   6   5   0   39.64    1.11 
  -7  -5   0    7.28    0.58 
  -7  -5   0    7.99    0.54 
  -7  -5   0    6.83    0.49 
  -7  -5   0    6.37    0.48 
  -7  -5   0    6.97    0.48 
  -7  -5   0    7.10    0.46 
  -7  -5   0    7.35    0.50 
   7   5   0    7.16    0.52 
   7   5   0    6.97    0.56 
   7   5   0    7.68    0.45 
   7   5   0    7.98    0.57 
   7   5   0    6.68    0.44 
   7   5   0    6.95    0.30 
   7   5   0    6.98    0.31 
  -8  -5   0    3.31    0.40 
  -8  -5   0    4.36    0.54 
  -8  -5   0    3.77    0.46 
  -8  -5   0    3.23    0.42 
  -8  -5   0    3.50    0.44 
  -8  -5   0    4.18    0.47 
   8   5   0    3.31    0.26 
   8   5   0    4.10    0.43 
   8   5   0    3.76    0.43 
   8   5   0    4.30    0.40 
   8   5   0    4.24    0.54 
   8   5   0    3.61    0.50 
  -9  -5   0   93.45    2.45 
  -9  -5   0   96.68    2.59 
  -9  -5   0   93.74    2.45 
  -9  -5   0   95.66    2.49 
  -9  -5   0   90.99    2.39 
   9   5   0   89.90    2.52 
   9   5   0   94.61    2.26 
   9   5   0   94.08    2.36 
   9   5   0   91.92    2.61 
   9   5   0   92.75    2.40 
 -10  -5   0  201.08    4.59 
 -10  -5   0  197.80    4.66 
 -10  -5   0  198.75    4.70 
 -10  -5   0  201.10    4.77 
 -10  -5   0  207.31    4.87 
  10   5   0  199.77    4.57 
  10   5   0  195.53    4.76 
  10   5   0  193.93    4.94 
  10   5   0  196.87    4.38 
  10   5   0  196.76    4.55 
 -11  -5   0   25.36    1.12 
 -11  -5   0   24.61    1.11 
 -11  -5   0   25.14    1.13 
 -11  -5   0   26.65    1.15 
 -11  -5   0   24.35    1.14 
  11   5   0   24.37    1.05 
  11   5   0   24.67    1.23 
  11   5   0   22.71    0.97 
  11   5   0   23.85    1.10 
  11   5   0   26.15    1.23 
 -12  -5   0    4.53    0.67 
 -12  -5   0    3.63    0.62 
 -12  -5   0    3.14    0.65 
 -12  -5   0    3.04    0.59 
  12   5   0    4.17    0.71 
  12   5   0    3.94    0.68 
  12   5   0    4.37    0.64 
  12   5   0    2.66    0.54 
  12   5   0    4.14    0.54 
 -13  -5   0   14.06    0.95 
 -13  -5   0   12.12    0.96 
 -13  -5   0   10.87    1.00 
 -13  -5   0   13.78    0.97 
  13   5   0   11.47    0.80 
  13   5   0   10.53    0.85 
  13   5   0   12.95    1.09 
  13   5   0   10.82    1.03 
  13   5   0   12.60    0.93 
 -14  -5   0   59.73    2.05 
 -14  -5   0   61.21    2.07 
 -14  -5   0   53.61    1.97 
 -14  -5   0   54.66    2.08 
  14   5   0   54.91    2.17 
  14   5   0   55.86    1.90 
  14   5   0   58.26    1.80 
  14   5   0   58.47    1.97 
  14   5   0   57.87    2.12 
 -15  -5   0   40.98    1.82 
 -15  -5   0   40.61    1.83 
 -15  -5   0   38.98    1.76 
  15   5   0   41.00    1.51 
  15   5   0   40.69    1.90 
  15   5   0   38.63    1.61 
  15   5   0   40.27    1.65 
  15   5   0   43.51    1.86 
 -16  -5   0   22.07    1.46 
  16   5   0   21.96    1.16 
  16   5   0   24.47    1.46 
  16   5   0   21.83    1.28 
  16   5   0   20.32    1.43 
  12  -6   0   -0.06    0.58 
  12  -6   0    0.16    0.46 
  12  -6   0   -0.22    0.54 
  12  -6   0    0.40    0.66 
  12  -6   0   -0.43    0.46 
 -12   6   0   -0.12    0.55 
 -12   6   0   -1.49    0.44 
 -12   6   0    0.08    0.62 
 -12   6   0    0.01    0.55 
  11  -6   0    1.14    0.53 
  11  -6   0    0.74    0.43 
  11  -6   0    1.17    0.62 
  11  -6   0    1.08    0.50 
  11  -6   0    1.90    0.66 
 -11   6   0    0.83    0.62 
 -11   6   0    1.29    0.58 
 -11   6   0    0.66    0.47 
 -11   6   0    1.16    0.56 
  10  -6   0   36.82    1.57 
  10  -6   0   36.64    1.41 
  10  -6   0   38.02    1.49 
  10  -6   0   35.50    1.38 
  10  -6   0   36.04    1.58 
 -10   6   0   38.86    1.49 
 -10   6   0   36.39    1.51 
 -10   6   0   35.11    1.59 
 -10   6   0   39.35    1.56 
   9  -6   0   77.05    2.40 
   9  -6   0   78.42    2.30 
   9  -6   0   79.35    2.19 
   9  -6   0   78.63    2.20 
   9  -6   0   76.51    2.38 
  -9   6   0   79.53    2.46 
  -9   6   0   82.18    2.30 
  -9   6   0   76.52    2.33 
  -9   6   0   79.56    2.32 
   8  -6   0   42.91    1.41 
   8  -6   0   43.02    1.57 
   8  -6   0   42.61    1.40 
   8  -6   0   43.88    1.50 
   8  -6   0   42.04    1.58 
  -8   6   0   42.41    1.33 
  -8   6   0   45.77    1.50 
  -8   6   0   42.91    1.50 
  -8   6   0   43.59    1.53 
  -8   6   0   41.61    1.57 
   7  -6   0   34.39    1.32 
   7  -6   0   34.52    1.25 
   7  -6   0   34.83    1.35 
   7  -6   0   35.97    1.19 
   7  -6   0   35.23    1.20 
  -7   6   0   35.56    1.26 
  -7   6   0   35.25    1.27 
  -7   6   0   33.55    1.32 
  -7   6   0   33.07    1.26 
  -7   6   0   34.32    1.14 
   6  -6   0    0.14    0.37 
   6  -6   0    0.26    0.29 
   6  -6   0   -0.08    0.27 
   6  -6   0    0.12    0.36 
   6  -6   0    0.03    0.33 
  -6   6   0   -0.15    0.31 
  -6   6   0   -0.35    0.28 
  -6   6   0   -0.25    0.27 
  -6   6   0    0.32    0.29 
  -6   6   0   -0.22    0.21 
   5  -6   0   64.30    1.82 
   5  -6   0   63.10    1.63 
   5  -6   0   64.97    1.68 
   5  -6   0   63.80    1.86 
   5  -6   0   64.73    1.80 
   5  -6   0   66.77    1.73 
  -5   6   0   62.65    1.68 
  -5   6   0   63.84    1.79 
  -5   6   0   64.58    1.79 
  -5   6   0   64.66    1.76 
  -5   6   0   64.16    1.84 
   4  -6   0  113.88    2.84 
   4  -6   0  114.31    2.65 
   4  -6   0  114.75    2.80 
   4  -6   0  115.69    2.68 
   4  -6   0  118.35    2.65 
   4  -6   0  113.70    2.62 
  -4   6   0  110.92    2.68 
  -4   6   0  115.89    2.65 
  -4   6   0  113.44    2.69 
  -4   6   0  115.39    2.83 
  -4   6   0  118.47    2.74 
  -4   6   0  115.07    2.79 
  -4   6   0  111.08    2.77 
   3  -6   0  145.19    3.27 
   3  -6   0  145.36    3.27 
   3  -6   0  144.99    3.39 
   3  -6   0  146.26    3.40 
   3  -6   0  148.44    3.44 
   3  -6   0  149.20    3.34 
   3  -6   0  151.49    3.26 
   3  -6   0  144.15    3.26 
  -3   6   0  145.52    3.39 
  -3   6   0  150.53    3.31 
  -3   6   0  140.54    3.27 
  -3   6   0  145.59    3.38 
  -3   6   0  144.86    3.22 
  -3   6   0  143.91    3.40 
  -3   6   0  142.47    3.26 
   2  -6   0    9.50    0.50 
   2  -6   0    9.82    0.57 
   2  -6   0    9.66    0.50 
   2  -6   0    9.75    0.36 
   2  -6   0   10.38    0.50 
   2  -6   0    9.51    0.46 
   2  -6   0   10.33    0.51 
   2  -6   0    9.36    0.55 
  -2   6   0   10.14    0.50 
  -2   6   0    9.62    0.53 
  -2   6   0    9.00    0.47 
  -2   6   0   10.10    0.52 
  -2   6   0    9.60    0.48 
  -2   6   0    9.79    0.47 
  -2   6   0    9.91    0.51 
   1  -6   0    1.32    0.24 
   1  -6   0    0.79    0.23 
   1  -6   0    1.23    0.28 
   1  -6   0    0.61    0.26 
   1  -6   0    1.01    0.16 
   1  -6   0    1.07    0.24 
   1  -6   0    0.65    0.23 
  -1   6   0    1.50    0.23 
  -1   6   0    1.44    0.26 
  -1   6   0    1.33    0.24 
  -1   6   0    0.67    0.23 
  -1   6   0    1.27    0.25 
  -1   6   0    1.05    0.21 
  -1   6   0    1.19    0.22 
   0  -6   0    0.21    0.20 
   0  -6   0    0.19    0.23 
   0  -6   0    0.48    0.23 
   0  -6   0    0.28    0.22 
   0  -6   0    0.50    0.20 
   0  -6   0    0.47    0.20 
   0  -6   0    0.27    0.23 
   0   6   0    0.47    0.20 
   0   6   0    0.37    0.20 
   0   6   0    0.07    0.18 
   0   6   0    0.30    0.16 
   0   6   0    0.22    0.15 
   0   6   0    0.10    0.17 
   0   6   0    0.29    0.18 
  -1  -6   0   38.55    1.11 
  -1  -6   0   38.86    1.06 
  -1  -6   0   40.73    1.10 
  -1  -6   0   40.81    1.20 
  -1  -6   0   39.40    1.09 
  -1  -6   0   40.74    1.07 
  -1  -6   0   40.05    1.09 
  -1  -6   0   41.20    1.19 
   1   6   0   39.36    1.09 
   1   6   0   38.91    1.06 
   1   6   0   36.92    1.04 
   1   6   0   37.68    1.08 
   1   6   0   39.78    1.05 
   1   6   0   39.12    1.02 
   1   6   0   38.52    1.06 
  -2  -6   0   37.87    1.07 
  -2  -6   0   38.38    1.18 
  -2  -6   0   38.44    1.06 
  -2  -6   0   37.44    1.03 
  -2  -6   0   38.85    1.06 
  -2  -6   0   37.40    1.00 
  -2  -6   0   37.47    1.08 
   2   6   0   36.16    1.01 
   2   6   0   36.95    1.02 
   2   6   0   38.76    1.05 
   2   6   0   38.30    1.04 
   2   6   0   36.37    1.06 
   2   6   0   38.26    1.05 
   2   6   0   38.05    0.99 
  -3  -6   0   -0.16    0.19 
  -3  -6   0   -0.07    0.24 
  -3  -6   0   -0.07    0.16 
  -3  -6   0   -0.07    0.15 
  -3  -6   0   -0.04    0.19 
  -3  -6   0    0.02    0.21 
  -3  -6   0    0.24    0.18 
   3   6   0   -0.02    0.16 
   3   6   0    0.18    0.20 
   3   6   0    0.13    0.16 
   3   6   0    0.44    0.20 
   3   6   0    0.02    0.22 
   3   6   0   -0.06    0.17 
   3   6   0    0.13    0.18 
  -4  -6   0  115.06    2.79 
  -4  -6   0  107.39    2.39 
  -4  -6   0  106.96    2.50 
  -4  -6   0  109.56    2.45 
  -4  -6   0  107.95    2.54 
  -4  -6   0  105.64    2.51 
  -4  -6   0  107.75    2.53 
   4   6   0  107.26    2.42 
   4   6   0  110.22    2.39 
   4   6   0  102.16    2.57 
   4   6   0  110.28    2.47 
   4   6   0  112.44    2.65 
   4   6   0  108.09    2.55 
   4   6   0  109.81    2.52 
  -5  -6   0   75.19    1.85 
  -5  -6   0   75.30    1.82 
  -5  -6   0   78.77    2.12 
  -5  -6   0   74.90    1.90 
  -5  -6   0   75.53    1.89 
  -5  -6   0   77.92    1.91 
   5   6   0   75.09    1.89 
   5   6   0   75.61    1.80 
   5   6   0   74.04    1.67 
   5   6   0   76.40    1.74 
   5   6   0   77.62    2.01 
   5   6   0   74.74    1.85 
   5   6   0   78.85    1.90 
   5   6   0   72.93    1.96 
  -6  -6   0    0.86    0.29 
  -6  -6   0    1.06    0.26 
  -6  -6   0    0.77    0.26 
  -6  -6   0    0.90    0.24 
  -6  -6   0    0.45    0.23 
  -6  -6   0    0.95    0.25 
  -6  -6   0    1.09    0.35 
   6   6   0    0.85    0.29 
   6   6   0    0.87    0.25 
   6   6   0    0.72    0.20 
   6   6   0    0.85    0.18 
   6   6   0    0.69    0.26 
   6   6   0    0.67    0.12 
   6   6   0    0.50    0.24 
   6   6   0    0.63    0.28 
  -7  -6   0    0.65    0.33 
  -7  -6   0    0.61    0.29 
  -7  -6   0    0.82    0.27 
  -7  -6   0    0.95    0.29 
  -7  -6   0    0.75    0.26 
  -7  -6   0    0.81    0.29 
  -7  -6   0    0.54    0.25 
   7   6   0    0.67    0.29 
   7   6   0    0.40    0.23 
   7   6   0    0.73    0.30 
   7   6   0    0.77    0.14 
   7   6   0    0.74    0.31 
   7   6   0    0.75    0.15 
   7   6   0    0.81    0.27 
   7   6   0    0.79    0.34 
  -8  -6   0   52.21    1.65 
  -8  -6   0   49.78    1.48 
  -8  -6   0   49.17    1.48 
  -8  -6   0   48.36    1.43 
  -8  -6   0   47.01    1.44 
   8   6   0   50.14    1.49 
   8   6   0   49.38    1.57 
   8   6   0   48.04    1.59 
   8   6   0   46.36    1.15 
   8   6   0   49.12    1.35 
  -9  -6   0  155.29    3.72 
  -9  -6   0  159.52    3.84 
  -9  -6   0  161.87    3.81 
  -9  -6   0  161.01    3.85 
  -9  -6   0  165.13    4.06 
   9   6   0  161.54    4.06 
   9   6   0  157.89    3.74 
   9   6   0  157.01    3.57 
   9   6   0  155.91    3.90 
 -10  -6   0   42.77    1.46 
 -10  -6   0   44.31    1.50 
 -10  -6   0   44.97    1.52 
 -10  -6   0   46.47    1.62 
 -10  -6   0   44.84    1.51 
  10   6   0   45.18    1.36 
  10   6   0   47.26    1.67 
  10   6   0   44.13    1.62 
  10   6   0   44.03    1.48 
 -11  -6   0    0.03    0.36 
 -11  -6   0    0.51    0.39 
 -11  -6   0    0.94    0.45 
 -11  -6   0   -0.32    0.37 
 -11  -6   0   -0.06    0.42 
  11   6   0    0.10    0.44 
  11   6   0    0.31    0.37 
  11   6   0   -0.43    0.41 
  11   6   0   -0.03    0.31 
 -12  -6   0   -0.02    0.41 
 -12  -6   0    0.57    0.41 
 -12  -6   0   -0.35    0.46 
 -12  -6   0    0.07    0.42 
 -12  -6   0   -0.26    0.39 
  12   6   0   -0.03    0.33 
  12   6   0   -0.36    0.48 
  12   6   0    0.37    0.46 
  12   6   0    0.25    0.42 
  12   6   0    0.29    0.38 
 -13  -6   0   12.07    0.99 
 -13  -6   0   13.43    0.93 
 -13  -6   0   11.47    0.96 
 -13  -6   0   12.37    0.96 
  13   6   0   10.70    1.02 
  13   6   0   11.99    0.86 
  13   6   0    9.81    1.03 
  13   6   0   11.10    0.90 
  13   6   0   10.18    0.78 
 -14  -6   0   19.34    1.22 
 -14  -6   0   20.45    1.19 
 -14  -6   0   19.69    1.23 
 -14  -6   0   19.85    1.17 
  14   6   0   17.94    1.22 
  14   6   0   19.22    1.29 
  14   6   0   17.79    1.07 
  14   6   0   16.40    1.08 
  14   6   0   18.73    1.01 
 -15  -6   0   27.98    1.51 
 -15  -6   0   29.89    1.54 
 -15  -6   0   29.69    1.56 
 -15  -6   0   32.53    1.54 
  15   6   0   24.52    1.53 
  15   6   0   28.77    1.44 
  15   6   0   31.28    1.59 
  15   6   0   26.83    1.26 
 -16  -6   0   16.68    1.25 
 -16  -6   0   13.89    1.27 
  16   6   0   18.05    1.18 
  16   6   0   16.13    1.26 
  16   6   0   15.05    1.04 
  16   6   0   13.27    1.33 
  12  -7   0   -0.16    0.51 
  12  -7   0   -0.02    0.61 
  12  -7   0    0.29    0.70 
  12  -7   0    0.03    0.46 
 -12   7   0   -0.21    0.59 
 -12   7   0   -0.12    0.53 
  11  -7   0    2.25    0.70 
  11  -7   0    2.67    0.80 
  11  -7   0    1.73    0.64 
  11  -7   0    2.01    0.58 
  11  -7   0    2.61    0.64 
 -11   7   0    2.44    0.74 
 -11   7   0    1.60    0.61 
 -11   7   0    2.36    0.72 
 -11   7   0    3.30    0.69 
  10  -7   0   69.46    2.42 
  10  -7   0   73.99    2.37 
  10  -7   0   76.70    2.24 
  10  -7   0   73.93    2.24 
  10  -7   0   73.66    2.44 
 -10   7   0   79.53    2.38 
 -10   7   0   74.79    2.50 
 -10   7   0   75.08    2.37 
 -10   7   0   76.41    2.42 
   9  -7   0   68.01    2.17 
   9  -7   0   67.55    2.05 
   9  -7   0   66.01    2.23 
   9  -7   0   67.84    2.27 
   9  -7   0   69.72    2.05 
  -9   7   0   73.73    2.20 
  -9   7   0   72.63    2.22 
  -9   7   0   68.47    2.28 
  -9   7   0   65.04    2.14 
   8  -7   0   12.54    0.83 
   8  -7   0   12.89    0.88 
   8  -7   0   10.28    0.93 
   8  -7   0   13.16    0.79 
   8  -7   0   12.16    1.02 
  -8   7   0   12.43    0.85 
  -8   7   0   13.06    0.90 
  -8   7   0   13.06    0.91 
  -8   7   0   11.74    0.76 
  -8   7   0   11.58    0.82 
   7  -7   0   13.02    0.92 
   7  -7   0   14.75    0.96 
   7  -7   0   15.29    0.82 
   7  -7   0   14.88    0.81 
   7  -7   0   14.26    0.87 
  -7   7   0   15.31    0.87 
  -7   7   0   15.06    0.78 
  -7   7   0   15.19    0.89 
  -7   7   0   14.81    0.89 
  -7   7   0   14.16    0.84 
   6  -7   0   11.67    0.72 
   6  -7   0   12.81    0.86 
   6  -7   0   11.34    0.84 
   6  -7   0   13.31    0.73 
   6  -7   0   12.38    0.79 
  -6   7   0   11.65    0.76 
  -6   7   0   12.90    0.79 
  -6   7   0   11.83    0.76 
  -6   7   0   12.60    0.70 
  -6   7   0   12.26    0.78 
   5  -7   0   29.63    1.06 
   5  -7   0   28.92    1.16 
   5  -7   0   28.56    1.15 
   5  -7   0   31.14    1.05 
  -5   7   0   29.07    1.12 
  -5   7   0   29.31    1.06 
  -5   7   0   29.72    1.11 
  -5   7   0   30.22    1.11 
  -5   7   0   28.94    1.10 
   4  -7   0   57.12    1.73 
   4  -7   0   56.88    1.69 
   4  -7   0   58.33    1.60 
   4  -7   0   56.67    1.58 
   4  -7   0   58.12    1.60 
  -4   7   0   56.30    1.66 
  -4   7   0   57.07    1.66 
  -4   7   0   58.23    1.65 
  -4   7   0   58.69    1.63 
  -4   7   0   59.82    1.62 
   3  -7   0   59.35    1.62 
   3  -7   0   60.21    1.73 
   3  -7   0   58.87    1.62 
   3  -7   0   59.89    1.58 
   3  -7   0   59.23    1.47 
   3  -7   0   62.86    1.72 
   3  -7   0   60.48    1.62 
  -3   7   0   58.81    1.61 
  -3   7   0   63.14    1.65 
  -3   7   0   60.11    1.69 
  -3   7   0   61.68    1.67 
  -3   7   0   62.34    1.66 
  -3   7   0   60.01    1.64 
  -3   7   0   60.75    1.63 
   2  -7   0    7.02    0.50 
   2  -7   0    7.50    0.55 
   2  -7   0    8.03    0.34 
   2  -7   0    7.13    0.55 
   2  -7   0    8.04    0.51 
   2  -7   0    7.31    0.50 
   2  -7   0    7.29    0.48 
   2  -7   0    8.39    0.47 
  -2   7   0    7.57    0.50 
  -2   7   0    8.87    0.49 
  -2   7   0    7.54    0.47 
  -2   7   0    8.30    0.53 
  -2   7   0    7.66    0.46 
  -2   7   0    7.40    0.50 
  -2   7   0    7.30    0.47 
   1  -7   0   -0.03    0.24 
   1  -7   0    0.05    0.22 
   1  -7   0    0.17    0.19 
   1  -7   0    0.44    0.28 
   1  -7   0    0.13    0.22 
   1  -7   0    0.21    0.13 
   1  -7   0    0.02    0.20 
  -1   7   0    0.18    0.19 
  -1   7   0    0.23    0.18 
  -1   7   0    0.10    0.19 
  -1   7   0   -0.15    0.20 
  -1   7   0    0.14    0.20 
  -1   7   0    0.13    0.21 
  -1   7   0    0.09    0.18 
   0  -7   0    0.28    0.21 
   0  -7   0    0.07    0.21 
   0  -7   0   -0.01    0.23 
   0  -7   0    0.17    0.24 
   0  -7   0    0.29    0.24 
   0  -7   0   -0.27    0.19 
   0  -7   0    0.49    0.27 
   0   7   0    0.21    0.19 
   0   7   0    0.06    0.18 
   0   7   0   -0.19    0.15 
   0   7   0    0.11    0.16 
   0   7   0    0.15    0.21 
   0   7   0    0.12    0.20 
   0   7   0    0.07    0.19 
  -1  -7   0   14.90    0.63 
  -1  -7   0   14.31    0.63 
  -1  -7   0   13.99    0.68 
  -1  -7   0   14.34    0.63 
  -1  -7   0   15.50    0.57 
  -1  -7   0   14.26    0.64 
  -1  -7   0   14.44    0.61 
  -1  -7   0   15.89    0.71 
   1   7   0   14.56    0.59 
   1   7   0   15.01    0.58 
   1   7   0   14.06    0.58 
   1   7   0   14.55    0.60 
   1   7   0   13.35    0.60 
   1   7   0   15.88    0.65 
   1   7   0   14.75    0.53 
  -2  -7   0    1.58    0.36 
  -2  -7   0    1.12    0.24 
  -2  -7   0    1.43    0.31 
  -2  -7   0    1.46    0.27 
  -2  -7   0    1.21    0.29 
  -2  -7   0    1.58    0.26 
  -2  -7   0    1.88    0.30 
   2   7   0    1.72    0.26 
   2   7   0    1.48    0.27 
   2   7   0    1.25    0.23 
   2   7   0    1.48    0.28 
   2   7   0    1.18    0.24 
   2   7   0    1.47    0.24 
   2   7   0    1.30    0.26 
  -3  -7   0   23.18    0.74 
  -3  -7   0   22.40    0.79 
  -3  -7   0   22.66    0.80 
  -3  -7   0   22.46    0.91 
  -3  -7   0   20.38    0.75 
  -3  -7   0   21.31    0.69 
  -3  -7   0   21.99    0.78 
   3   7   0   20.74    0.80 
   3   7   0   22.43    0.75 
   3   7   0   22.81    0.80 
   3   7   0   21.65    0.71 
   3   7   0   22.30    0.74 
   3   7   0   21.98    0.76 
   3   7   0   21.56    0.75 
  -4  -7   0   48.06    1.34 
  -4  -7   0   49.96    1.37 
  -4  -7   0   48.03    1.28 
  -4  -7   0   48.68    1.31 
  -4  -7   0   48.21    1.33 
  -4  -7   0   48.07    1.52 
  -4  -7   0   48.69    1.22 
   4   7   0   47.08    1.39 
   4   7   0   49.05    1.36 
   4   7   0   48.79    1.37 
   4   7   0   47.09    1.27 
   4   7   0   47.63    1.27 
   4   7   0   49.21    1.29 
   4   7   0   49.75    1.33 
  -5  -7   0    7.49    0.43 
  -5  -7   0    7.08    0.47 
  -5  -7   0    7.45    0.34 
  -5  -7   0    7.83    0.47 
  -5  -7   0    7.62    0.53 
  -5  -7   0    7.91    0.50 
  -5  -7   0    6.60    0.60 
   5   7   0    7.47    0.47 
   5   7   0    7.64    0.31 
   5   7   0    8.62    0.45 
   5   7   0    7.91    0.43 
   5   7   0    7.00    0.48 
   5   7   0    7.41    0.53 
   5   7   0    8.20    0.53 
   5   7   0    7.58    0.45 
  -6  -7   0   24.83    0.85 
  -6  -7   0   26.73    0.87 
  -6  -7   0   27.95    1.12 
  -6  -7   0   26.43    0.95 
  -6  -7   0   25.24    0.88 
  -6  -7   0   26.45    0.91 
  -6  -7   0   25.28    0.93 
   6   7   0   26.85    0.87 
   6   7   0   25.57    0.67 
   6   7   0   26.61    0.96 
   6   7   0   27.40    0.82 
   6   7   0   25.85    1.00 
   6   7   0   26.10    0.99 
   6   7   0   27.28    0.92 
   6   7   0   27.37    0.90 
  -7  -7   0   29.45    1.01 
  -7  -7   0   27.19    0.96 
  -7  -7   0   28.93    0.97 
  -7  -7   0   28.58    1.04 
  -7  -7   0   31.51    1.21 
  -7  -7   0   27.90    0.96 
  -7  -7   0   30.42    1.04 
   7   7   0   28.84    0.84 
   7   7   0   28.38    1.01 
   7   7   0   28.27    1.10 
   7   7   0   29.67    1.11 
   7   7   0   28.63    1.05 
   7   7   0   28.23    0.94 
  -8  -7   0  102.44    2.60 
  -8  -7   0  102.82    2.52 
  -8  -7   0  106.09    2.86 
  -8  -7   0  100.78    2.57 
  -8  -7   0  102.91    2.61 
   8   7   0  100.85    2.24 
   8   7   0  101.05    2.77 
   8   7   0  102.04    2.70 
   8   7   0  102.13    2.58 
   8   7   0  103.53    2.58 
   8   7   0  100.38    2.43 
  -9  -7   0   91.83    2.41 
  -9  -7   0   91.85    2.62 
  -9  -7   0   89.53    2.39 
  -9  -7   0   89.69    2.37 
  -9  -7   0   91.23    2.33 
   9   7   0   84.22    2.47 
   9   7   0   88.49    2.57 
   9   7   0   89.65    2.37 
   9   7   0   88.62    2.22 
 -10  -7   0   22.64    1.02 
 -10  -7   0   21.71    0.99 
 -10  -7   0   21.84    0.99 
 -10  -7   0   21.45    1.13 
 -10  -7   0   21.70    0.99 
  10   7   0   22.64    0.91 
  10   7   0   20.17    1.08 
  10   7   0   21.25    1.02 
  10   7   0   21.74    1.15 
 -11  -7   0    0.97    0.45 
 -11  -7   0    1.12    0.44 
 -11  -7   0    0.58    0.41 
 -11  -7   0    0.51    0.42 
 -11  -7   0    1.45    0.45 
  11   7   0    0.68    0.48 
  11   7   0    0.54    0.36 
  11   7   0    0.40    0.38 
  11   7   0    0.22    0.49 
 -12  -7   0    8.86    0.81 
 -12  -7   0    7.19    0.73 
 -12  -7   0    8.06    0.81 
 -12  -7   0    8.14    0.78 
 -12  -7   0    6.95    0.80 
  12   7   0    7.82    0.90 
  12   7   0    7.01    0.71 
  12   7   0    7.95    0.69 
  12   7   0    7.38    0.84 
 -13  -7   0   18.52    1.10 
 -13  -7   0   15.78    1.11 
 -13  -7   0   20.44    1.10 
 -13  -7   0   16.72    1.07 
 -13  -7   0   17.61    1.10 
  13   7   0   16.80    0.93 
  13   7   0   17.26    1.21 
  13   7   0   15.92    1.15 
  13   7   0   18.02    1.10 
 -14  -7   0   24.31    1.33 
 -14  -7   0   23.10    1.27 
 -14  -7   0   24.16    1.29 
 -14  -7   0   24.38    1.29 
  14   7   0   23.10    1.38 
  14   7   0   23.57    1.11 
  14   7   0   22.91    1.26 
  14   7   0   23.37    1.44 
 -15  -7   0   11.10    1.08 
 -15  -7   0   11.12    1.01 
 -15  -7   0   13.11    1.19 
 -15  -7   0   10.84    1.08 
  15   7   0    8.97    1.14 
  15   7   0   10.67    1.11 
  15   7   0   11.16    0.91 
  15   7   0   10.82    0.97 
 -16  -7   0    1.98    0.68 
 -16  -7   0    1.74    0.73 
  16   7   0    2.53    0.65 
  16   7   0    1.34    0.63 
  16   7   0    1.23    0.69 
  16   7   0    2.34    0.61 
  11  -8   0   39.26    1.82 
  11  -8   0   39.14    1.86 
  11  -8   0   37.30    1.61 
  11  -8   0   39.13    1.59 
 -11   8   0   38.90    1.82 
 -11   8   0   42.97    1.77 
  10  -8   0   50.12    2.06 
  10  -8   0   53.22    1.84 
  10  -8   0   50.50    2.04 
  10  -8   0   51.18    1.81 
 -10   8   0   55.69    1.98 
 -10   8   0   53.12    1.96 
 -10   8   0   54.19    2.07 
 -10   8   0   50.78    2.02 
   9  -8   0   12.40    0.91 
   9  -8   0   11.06    1.07 
   9  -8   0   10.85    1.04 
   9  -8   0   12.50    0.92 
  -9   8   0   13.74    1.01 
  -9   8   0   12.30    0.99 
  -9   8   0   13.87    1.03 
  -9   8   0   12.82    0.95 
   8  -8   0    4.36    0.74 
   8  -8   0    4.24    0.72 
   8  -8   0    4.39    0.63 
   8  -8   0    4.84    0.60 
  -8   8   0    4.90    0.63 
  -8   8   0    3.88    0.60 
  -8   8   0    4.72    0.70 
  -8   8   0    4.76    0.67 
   7  -8   0    3.74    0.56 
   7  -8   0    2.39    0.61 
   7  -8   0    2.48    0.64 
   7  -8   0    3.86    0.57 
  -7   8   0    3.28    0.57 
  -7   8   0    2.50    0.52 
  -7   8   0    3.27    0.49 
  -7   8   0    3.26    0.53 
  -7   8   0    3.18    0.59 
   6  -8   0   30.49    1.17 
   6  -8   0   28.00    1.28 
   6  -8   0   28.34    1.29 
   6  -8   0   32.08    1.17 
   6  -8   0   30.66    1.16 
  -6   8   0   30.44    1.23 
  -6   8   0   31.38    1.22 
  -6   8   0   28.16    1.19 
  -6   8   0   29.17    1.15 
  -6   8   0   28.97    1.21 
   5  -8   0   48.25    1.48 
   5  -8   0   48.60    1.50 
   5  -8   0   46.92    1.62 
   5  -8   0   46.22    1.58 
   5  -8   0   48.74    1.50 
  -5   8   0   45.33    1.48 
  -5   8   0   48.81    1.54 
  -5   8   0   48.90    1.57 
  -5   8   0   47.59    1.56 
  -5   8   0   48.43    1.55 
   4  -8   0   40.64    1.47 
   4  -8   0   45.64    1.39 
   4  -8   0   44.00    1.38 
   4  -8   0   45.97    1.49 
  -4   8   0   42.28    1.42 
  -4   8   0   45.67    1.41 
  -4   8   0   43.10    1.40 
  -4   8   0   44.12    1.41 
  -4   8   0   41.65    1.37 
   3  -8   0   20.97    0.95 
   3  -8   0   19.63    0.76 
   3  -8   0   21.46    0.88 
   3  -8   0   20.97    0.94 
   3  -8   0   20.45    0.86 
  -3   8   0   21.89    0.89 
  -3   8   0   21.43    0.87 
  -3   8   0   19.53    0.87 
  -3   8   0   19.44    0.83 
  -3   8   0   20.65    0.88 
   2  -8   0    1.23    0.32 
   2  -8   0    0.90    0.36 
   2  -8   0    1.46    0.29 
   2  -8   0    0.91    0.28 
   2  -8   0    1.41    0.32 
   2  -8   0    1.99    0.41 
  -2   8   0    1.14    0.30 
  -2   8   0    1.40    0.30 
  -2   8   0    1.38    0.28 
  -2   8   0    1.69    0.31 
  -2   8   0    1.20    0.30 
  -2   8   0    1.76    0.32 
  -2   8   0    1.87    0.33 
  -2   8   0    1.30    0.32 
   1  -8   0    1.81    0.39 
   1  -8   0    2.78    0.25 
   1  -8   0    2.70    0.36 
   1  -8   0    2.34    0.37 
   1  -8   0    2.16    0.40 
   1  -8   0    2.40    0.35 
   1  -8   0    1.75    0.33 
  -1   8   0    2.29    0.36 
  -1   8   0    1.98    0.33 
  -1   8   0    2.71    0.35 
  -1   8   0    2.94    0.37 
  -1   8   0    2.52    0.33 
  -1   8   0    3.01    0.41 
  -1   8   0    3.34    0.36 
   0  -8   0    1.93    0.37 
   0  -8   0    1.74    0.38 
   0  -8   0    1.96    0.36 
   0  -8   0    1.99    0.31 
   0  -8   0    1.73    0.33 
   0  -8   0    1.28    0.27 
   0  -8   0    2.73    0.37 
   0  -8   0    1.48    0.23 
   0   8   0    2.72    0.39 
   0   8   0    2.19    0.31 
   0   8   0    1.75    0.30 
   0   8   0    1.93    0.32 
   0   8   0    1.84    0.32 
   0   8   0    2.14    0.25 
   0   8   0    2.14    0.31 
  -1  -8   0   10.05    0.58 
  -1  -8   0   10.33    0.61 
  -1  -8   0    9.25    0.54 
  -1  -8   0    9.37    0.60 
  -1  -8   0    9.88    0.61 
  -1  -8   0   10.00    0.50 
  -1  -8   0   10.48    0.58 
   1   8   0   10.02    0.52 
   1   8   0   11.22    0.58 
   1   8   0   10.26    0.46 
   1   8   0   10.39    0.51 
   1   8   0    9.82    0.53 
   1   8   0    9.76    0.53 
   1   8   0    9.09    0.54 
  -2  -8   0   46.94    1.48 
  -2  -8   0   47.02    1.28 
  -2  -8   0   46.59    1.33 
  -2  -8   0   45.27    1.33 
  -2  -8   0   46.47    1.37 
  -2  -8   0   46.85    1.33 
  -2  -8   0   46.85    1.42 
  -2  -8   0   47.35    1.29 
   2   8   0   46.30    1.31 
   2   8   0   44.50    1.32 
   2   8   0   45.77    1.25 
   2   8   0   43.73    1.24 
   2   8   0   46.76    1.36 
   2   8   0   47.12    1.30 
   2   8   0   47.06    1.28 
  -3  -8   0   23.81    0.78 
  -3  -8   0   24.50    0.82 
  -3  -8   0   23.49    0.88 
  -3  -8   0   23.97    1.00 
  -3  -8   0   23.90    0.89 
  -3  -8   0   24.27    0.87 
  -3  -8   0   23.33    0.88 
   3   8   0   24.47    0.81 
   3   8   0   23.72    0.79 
   3   8   0   23.68    0.86 
   3   8   0   23.12    0.84 
   3   8   0   25.21    0.83 
   3   8   0   23.27    0.89 
   3   8   0   24.67    0.83 
  -4  -8   0   19.31    0.77 
  -4  -8   0   18.99    0.80 
  -4  -8   0   19.53    0.91 
  -4  -8   0   20.05    0.80 
  -4  -8   0   19.54    0.67 
  -4  -8   0   19.45    0.76 
  -4  -8   0   19.47    0.71 
   4   8   0   19.61    0.83 
   4   8   0   20.27    0.76 
   4   8   0   19.36    0.75 
   4   8   0   18.88    0.72 
   4   8   0   19.48    0.72 
   4   8   0   19.75    0.73 
   4   8   0   19.46    0.81 
  -5  -8   0    7.88    0.45 
  -5  -8   0    7.87    0.50 
  -5  -8   0    7.32    0.67 
  -5  -8   0    7.46    0.38 
  -5  -8   0    8.31    0.52 
  -5  -8   0    7.75    0.56 
  -5  -8   0    7.44    0.55 
   5   8   0    8.18    0.48 
   5   8   0    7.98    0.49 
   5   8   0    7.43    0.47 
   5   8   0    7.01    0.52 
   5   8   0    7.91    0.47 
   5   8   0    7.30    0.58 
   5   8   0    6.90    0.55 
  -6  -8   0   22.24    0.86 
  -6  -8   0   21.46    0.91 
  -6  -8   0   23.29    0.90 
  -6  -8   0   22.26    0.80 
  -6  -8   0   22.05    1.05 
  -6  -8   0   21.89    0.84 
   6   8   0   21.48    0.81 
   6   8   0   20.71    0.85 
   6   8   0   22.85    0.85 
   6   8   0   22.50    0.63 
   6   8   0   22.98    0.93 
   6   8   0   23.46    0.79 
   6   8   0   22.20    0.92 
   6   8   0   20.59    0.94 
  -7  -8   0  109.49    2.66 
  -7  -8   0  111.99    2.65 
  -7  -8   0  112.90    2.76 
  -7  -8   0  111.63    2.71 
  -7  -8   0  111.01    3.06 
  -7  -8   0  109.97    2.75 
   7   8   0  113.77    2.93 
   7   8   0  110.96    2.70 
   7   8   0  111.98    2.50 
   7   8   0  109.28    2.76 
   7   8   0  108.45    2.61 
   7   8   0  108.44    2.86 
  -8  -8   0  165.92    4.21 
  -8  -8   0  162.06    3.85 
  -8  -8   0  160.32    3.72 
  -8  -8   0  159.67    3.82 
  -8  -8   0  162.43    3.81 
   8   8   0  162.93    3.45 
   8   8   0  164.14    4.08 
   8   8   0  159.13    3.81 
   8   8   0  155.98    3.94 
   8   8   0  161.03    3.77 
   8   8   0  162.64    3.64 
  -9  -8   0   70.67    2.04 
  -9  -8   0   71.07    2.28 
  -9  -8   0   75.62    2.01 
  -9  -8   0   71.39    2.03 
  -9  -8   0   72.80    2.00 
   9   8   0   71.65    1.91 
   9   8   0   72.13    2.18 
   9   8   0   71.59    2.05 
   9   8   0   70.53    2.20 
 -10  -8   0    3.19    0.54 
 -10  -8   0    2.34    0.60 
 -10  -8   0    1.48    0.43 
 -10  -8   0    2.47    0.49 
 -10  -8   0    2.06    0.50 
  10   8   0    2.63    0.49 
  10   8   0    1.89    0.53 
  10   8   0    1.93    0.56 
  10   8   0    2.31    0.43 
 -11  -8   0    9.40    0.76 
 -11  -8   0   10.19    0.97 
 -11  -8   0   11.58    0.81 
 -11  -8   0   11.28    0.80 
 -11  -8   0    9.60    0.83 
  11   8   0   11.28    0.98 
  11   8   0   11.23    0.74 
  11   8   0   11.32    0.84 
  11   8   0   11.66    0.93 
 -12  -8   0   10.48    1.00 
 -12  -8   0    9.06    0.81 
 -12  -8   0    9.05    0.81 
 -12  -8   0    9.68    0.84 
 -12  -8   0    9.40    0.85 
  12   8   0    9.58    0.76 
  12   8   0    8.12    0.77 
  12   8   0    9.12    0.98 
  12   8   0    9.24    0.93 
 -13  -8   0   24.17    1.20 
 -13  -8   0   22.87    1.21 
 -13  -8   0   25.27    1.34 
 -13  -8   0   24.50    1.22 
 -13  -8   0   23.34    1.21 
  13   8   0   22.85    1.10 
  13   8   0   24.86    1.25 
  13   8   0   22.10    1.36 
  13   8   0   23.00    1.34 
 -14  -8   0   51.05    1.85 
 -14  -8   0   50.67    1.90 
 -14  -8   0   50.74    1.89 
 -14  -8   0   50.59    1.90 
  14   8   0   47.76    2.05 
  14   8   0   50.69    2.02 
  14   8   0   51.72    1.71 
  14   8   0   51.51    1.89 
 -15  -8   0    4.44    0.81 
 -15  -8   0    5.81    0.84 
 -15  -8   0    4.33    0.84 
  15   8   0    4.56    0.91 
  15   8   0    4.88    0.77 
  15   8   0    4.30    0.82 
  15   8   0    5.11    0.69 
  10  -9   0   11.84    1.01 
  10  -9   0   13.76    1.02 
  10  -9   0   12.08    1.24 
  10  -9   0   14.26    1.04 
  10  -9   0   10.33    1.10 
 -10   9   0   10.61    1.10 
 -10   9   0   12.58    1.12 
   9  -9   0    2.08    0.57 
   9  -9   0    3.09    0.60 
   9  -9   0    1.95    0.65 
   9  -9   0    3.13    0.83 
   9  -9   0    2.73    0.59 
  -9   9   0    2.61    0.71 
  -9   9   0    4.20    0.74 
  -9   9   0    2.45    0.65 
  -9   9   0    2.64    0.64 
   8  -9   0    0.51    0.63 
   8  -9   0    0.08    0.39 
   8  -9   0   -0.62    0.40 
   8  -9   0   -0.52    0.50 
   8  -9   0    0.09    0.43 
  -8   9   0    0.11    0.49 
  -8   9   0   -0.14    0.40 
  -8   9   0    0.26    0.49 
  -8   9   0   -0.22    0.41 
   7  -9   0   -0.14    0.55 
   7  -9   0    0.94    0.46 
   7  -9   0    0.42    0.43 
   7  -9   0    0.10    0.39 
   7  -9   0    0.76    0.55 
  -7   9   0    0.74    0.50 
  -7   9   0    0.12    0.46 
  -7   9   0    0.24    0.33 
  -7   9   0    0.30    0.36 
  -7   9   0   -0.21    0.37 
   6  -9   0   30.12    1.21 
   6  -9   0   28.36    1.17 
   6  -9   0   30.76    1.36 
   6  -9   0   29.43    1.35 
   6  -9   0   29.87    1.21 
  -6   9   0   29.89    1.27 
  -6   9   0   31.31    1.27 
  -6   9   0   30.98    1.28 
  -6   9   0   29.75    1.25 
  -6   9   0   29.46    1.21 
   5  -9   0   32.67    1.33 
   5  -9   0   31.31    1.21 
   5  -9   0   29.98    1.33 
   5  -9   0   32.26    1.23 
  -5   9   0   32.42    1.26 
  -5   9   0   32.53    1.25 
  -5   9   0   32.98    1.28 
  -5   9   0   32.11    1.24 
  -5   9   0   32.01    1.25 
   4  -9   0    0.67    0.34 
   4  -9   0    1.11    0.40 
   4  -9   0    0.53    0.43 
   4  -9   0    0.34    0.46 
  -4   9   0    0.51    0.31 
  -4   9   0    0.60    0.38 
  -4   9   0    0.61    0.36 
  -4   9   0    0.96    0.37 
  -4   9   0    0.20    0.33 
   3  -9   0    1.87    0.49 
   3  -9   0    1.75    0.38 
   3  -9   0    1.48    0.41 
   3  -9   0    1.85    0.46 
  -3   9   0    1.71    0.39 
  -3   9   0    2.23    0.42 
  -3   9   0    2.46    0.41 
  -3   9   0    1.93    0.41 
  -3   9   0    1.96    0.42 
   2  -9   0    3.16    0.42 
   2  -9   0    3.69    0.52 
   2  -9   0    3.43    0.46 
   2  -9   0    4.88    0.48 
   2  -9   0    3.41    0.52 
   2  -9   0    4.07    0.47 
  -2   9   0    3.64    0.47 
  -2   9   0    3.57    0.44 
  -2   9   0    4.65    0.47 
  -2   9   0    3.41    0.46 
  -2   9   0    4.55    0.48 
  -2   9   0    4.02    0.46 
   1  -9   0    0.44    0.30 
   1  -9   0   -0.10    0.24 
   1  -9   0   -0.14    0.30 
   1  -9   0    0.12    0.35 
   1  -9   0   -0.08    0.33 
  -1   9   0   -0.03    0.22 
  -1   9   0   -0.26    0.23 
  -1   9   0   -0.33    0.21 
  -1   9   0   -0.22    0.22 
  -1   9   0    0.17    0.23 
  -1   9   0   -0.21    0.23 
  -1   9   0    0.46    0.30 
   0  -9   0    4.96    0.46 
   0  -9   0    5.77    0.54 
   0  -9   0    6.39    0.54 
   0  -9   0    6.32    0.46 
   0  -9   0    6.26    0.59 
   0  -9   0    7.38    0.65 
   0  -9   0    6.70    0.40 
   0  -9   0    6.44    0.57 
   0   9   0    6.41    0.50 
   0   9   0    7.08    0.52 
   0   9   0    7.22    0.48 
   0   9   0    6.70    0.50 
   0   9   0    6.57    0.50 
   0   9   0    6.43    0.38 
   0   9   0    6.45    0.56 
  -1  -9   0   21.32    0.92 
  -1  -9   0   22.83    0.99 
  -1  -9   0   24.34    0.92 
  -1  -9   0   23.53    0.91 
  -1  -9   0   23.38    0.82 
  -1  -9   0   24.20    0.90 
  -1  -9   0   24.90    0.98 
   1   9   0   23.76    0.86 
   1   9   0   24.39    0.87 
   1   9   0   22.65    0.77 
   1   9   0   24.80    0.96 
   1   9   0   24.54    0.90 
   1   9   0   23.95    0.86 
   1   9   0   22.82    0.90 
  -2  -9   0   61.61    1.60 
  -2  -9   0   60.11    1.61 
  -2  -9   0   61.30    1.67 
  -2  -9   0   61.51    1.85 
  -2  -9   0   62.39    1.78 
  -2  -9   0   58.60    1.69 
  -2  -9   0   60.40    1.65 
  -2  -9   0   61.47    1.66 
   2   9   0   58.20    1.62 
   2   9   0   58.09    1.65 
   2   9   0   58.85    1.69 
   2   9   0   60.35    1.61 
   2   9   0   57.23    1.56 
   2   9   0   60.59    1.58 
   2   9   0   60.38    1.64 
  -3  -9   0   36.40    1.10 
  -3  -9   0   37.72    1.19 
  -3  -9   0   36.85    1.12 
  -3  -9   0   38.10    1.23 
  -3  -9   0   37.47    1.21 
  -3  -9   0   36.54    1.25 
  -3  -9   0   36.90    1.35 
   3   9   0   37.55    1.19 
   3   9   0   37.21    1.10 
   3   9   0   37.99    1.15 
   3   9   0   38.89    1.21 
   3   9   0   37.99    1.12 
   3   9   0   37.24    1.14 
   3   9   0   37.45    1.25 
  -4  -9   0    5.31    0.48 
  -4  -9   0    4.28    0.46 
  -4  -9   0    5.47    0.43 
  -4  -9   0    6.04    0.67 
  -4  -9   0    5.24    0.42 
  -4  -9   0    5.15    0.52 
  -4  -9   0    4.12    0.49 
   4   9   0    4.68    0.43 
   4   9   0    5.23    0.51 
   4   9   0    5.66    0.46 
   4   9   0    5.66    0.50 
   4   9   0    4.87    0.51 
   4   9   0    5.18    0.42 
   4   9   0    5.13    0.42 
  -5  -9   0    1.16    0.32 
  -5  -9   0    1.44    0.38 
  -5  -9   0    1.33    0.35 
  -5  -9   0    1.17    0.44 
  -5  -9   0    1.50    0.27 
  -5  -9   0    1.58    0.32 
  -5  -9   0    1.85    0.36 
   5   9   0    1.26    0.36 
   5   9   0    1.65    0.32 
   5   9   0    1.65    0.32 
   5   9   0    1.94    0.37 
   5   9   0    1.56    0.31 
   5   9   0    1.50    0.30 
   5   9   0    1.17    0.36 
  -6  -9   0   26.60    0.99 
  -6  -9   0   25.13    1.18 
  -6  -9   0   25.65    0.91 
  -6  -9   0   26.50    1.02 
  -6  -9   0   26.59    0.98 
  -6  -9   0   25.47    1.04 
   6   9   0   26.11    0.96 
   6   9   0   25.78    1.05 
   6   9   0   24.56    1.06 
   6   9   0   26.44    0.92 
   6   9   0   25.95    1.02 
   6   9   0   26.53    0.94 
  -7  -9   0   48.22    1.51 
  -7  -9   0   50.48    1.50 
  -7  -9   0   48.29    1.42 
  -7  -9   0   47.86    1.75 
   7   9   0   48.31    1.55 
   7   9   0   49.74    1.36 
   7   9   0   47.02    1.45 
   7   9   0   47.06    1.41 
   7   9   0   45.37    1.58 
   7   9   0   49.77    1.60 
  -8  -9   0  139.79    3.38 
  -8  -9   0  146.60    3.45 
  -8  -9   0  139.28    3.30 
  -8  -9   0  133.90    3.76 
  -8  -9   0  140.56    3.42 
   8   9   0  140.64    3.26 
   8   9   0  139.77    3.43 
   8   9   0  141.47    3.37 
   8   9   0  135.74    3.54 
   8   9   0  140.18    3.11 
   8   9   0  138.73    3.62 
  -9  -9   0   49.50    1.84 
  -9  -9   0   49.22    1.59 
  -9  -9   0   51.21    1.53 
  -9  -9   0   46.72    1.54 
  -9  -9   0   49.63    1.53 
   9   9   0   47.44    1.70 
   9   9   0   47.15    1.47 
   9   9   0   49.05    1.56 
   9   9   0   49.66    1.73 
   9   9   0   48.39    1.62 
 -10  -9   0    0.95    0.49 
 -10  -9   0    0.43    0.40 
 -10  -9   0    0.62    0.37 
 -10  -9   0   -0.06    0.39 
 -10  -9   0    0.12    0.34 
  10   9   0    1.17    0.43 
  10   9   0    0.03    0.45 
  10   9   0    0.29    0.33 
  10   9   0    0.79    0.48 
 -11  -9   0    0.92    0.56 
 -11  -9   0    2.15    0.52 
 -11  -9   0    2.68    0.55 
 -11  -9   0    2.19    0.50 
 -11  -9   0    2.53    0.50 
  11   9   0    2.10    0.60 
  11   9   0    2.32    0.48 
  11   9   0    1.91    0.60 
  11   9   0    1.69    0.48 
 -12  -9   0    5.08    0.69 
 -12  -9   0    6.01    0.75 
 -12  -9   0    6.07    0.69 
 -12  -9   0    5.87    0.68 
 -12  -9   0    5.90    0.85 
  12   9   0    4.59    0.80 
  12   9   0    6.52    0.66 
  12   9   0    5.81    0.71 
  12   9   0    5.52    0.80 
 -13  -9   0   40.93    1.60 
 -13  -9   0   40.22    1.61 
 -13  -9   0   40.05    1.58 
 -13  -9   0   41.03    1.58 
 -13  -9   0   39.74    1.78 
  13   9   0   39.47    1.83 
  13   9   0   40.67    1.63 
  13   9   0   38.91    1.75 
  13   9   0   40.61    1.46 
 -14  -9   0   12.20    1.08 
 -14  -9   0    9.76    0.92 
 -14  -9   0   12.23    1.07 
 -14  -9   0   10.71    1.18 
  14   9   0    9.29    1.04 
  14   9   0    9.79    1.16 
  14   9   0   11.02    1.02 
  14   9   0   11.58    0.89 
 -15  -9   0    0.20    0.61 
 -15  -9   0    0.09    0.59 
  15   9   0    1.37    0.67 
  15   9   0    0.27    0.66 
  15   9   0    0.60    0.48 
  15   9   0    0.79    0.57 
   9 -10   0    1.04    0.77 
   9 -10   0    2.10    0.58 
   9 -10   0    0.89    0.65 
   9 -10   0    1.26    0.53 
  -9  10   0    2.11    0.65 
  -9  10   0    2.25    0.67 
   8 -10   0    0.16    0.68 
   8 -10   0    0.22    0.43 
   8 -10   0    0.46    0.49 
   8 -10   0    0.45    0.55 
  -8  10   0   -0.34    0.50 
  -8  10   0    1.21    0.57 
  -8  10   0    0.04    0.48 
   7 -10   0   12.20    0.91 
   7 -10   0    9.36    0.96 
   7 -10   0   11.51    0.96 
   7 -10   0   12.56    1.11 
  -7  10   0   12.30    0.94 
  -7  10   0   12.45    0.93 
  -7  10   0   10.56    0.94 
  -7  10   0   11.77    0.99 
  -7  10   0   12.21    0.88 
   6 -10   0   52.02    1.88 
   6 -10   0   48.85    1.87 
   6 -10   0   49.42    1.70 
   6 -10   0   52.49    1.74 
  -6  10   0   55.05    1.82 
  -6  10   0   51.83    1.79 
  -6  10   0   49.00    1.71 
  -6  10   0   50.60    1.78 
  -6  10   0   52.35    1.78 
   5 -10   0    2.86    0.65 
   5 -10   0    2.76    0.63 
   5 -10   0    2.74    0.54 
   5 -10   0    1.82    0.48 
  -5  10   0    2.92    0.53 
  -5  10   0    1.92    0.48 
  -5  10   0    1.95    0.48 
  -5  10   0    3.00    0.54 
  -5  10   0    2.91    0.51 
   4 -10   0    5.94    0.75 
   4 -10   0    5.72    0.65 
   4 -10   0    5.37    0.69 
   4 -10   0    6.27    0.68 
  -4  10   0    5.71    0.64 
  -4  10   0    5.16    0.58 
  -4  10   0    5.71    0.63 
  -4  10   0    5.45    0.60 
  -4  10   0    7.14    0.67 
   3 -10   0   25.09    1.10 
   3 -10   0   26.14    1.08 
   3 -10   0   25.76    1.17 
   3 -10   0   27.33    1.20 
  -3  10   0   27.29    1.05 
  -3  10   0   27.90    1.11 
  -3  10   0   26.43    1.07 
  -3  10   0   27.03    1.09 
  -3  10   0   27.25    1.15 
   2 -10   0   10.29    0.78 
   2 -10   0   10.63    0.70 
   2 -10   0   10.76    0.68 
   2 -10   0   11.07    0.72 
   2 -10   0   11.93    0.75 
   2 -10   0    9.94    0.76 
  -2  10   0   11.76    0.72 
  -2  10   0   11.34    0.74 
  -2  10   0   12.01    0.71 
  -2  10   0    9.70    0.69 
  -2  10   0   10.59    0.63 
  -2  10   0   10.65    0.69 
   1 -10   0    1.43    0.39 
   1 -10   0    0.40    0.31 
   1 -10   0    1.02    0.42 
   1 -10   0    1.57    0.40 
   1 -10   0    1.41    0.45 
  -1  10   0    0.88    0.34 
  -1  10   0    1.12    0.34 
  -1  10   0    1.08    0.35 
  -1  10   0    0.70    0.34 
  -1  10   0    1.39    0.36 
   0 -10   0    0.78    0.35 
   0 -10   0    1.04    0.39 
   0 -10   0    0.53    0.37 
   0 -10   0    1.22    0.34 
   0 -10   0    1.07    0.41 
   0 -10   0    0.47    0.33 
   0  10   0    1.15    0.35 
   0  10   0    0.90    0.35 
   0  10   0    0.76    0.31 
   0  10   0    1.38    0.34 
   0  10   0    0.70    0.31 
  -1 -10   0   25.13    0.99 
  -1 -10   0   23.86    1.08 
  -1 -10   0   23.36    1.02 
  -1 -10   0   25.86    1.01 
  -1 -10   0   24.99    0.89 
  -1 -10   0   26.10    1.01 
   1  10   0   23.41    0.92 
   1  10   0   24.90    0.93 
   1  10   0   23.18    0.99 
   1  10   0   25.64    0.97 
   1  10   0   24.87    0.84 
   1  10   0   25.41    0.93 
   1  10   0   24.64    1.00 
  -2 -10   0   44.96    1.36 
  -2 -10   0   41.81    1.54 
  -2 -10   0   48.35    1.53 
  -2 -10   0   45.80    1.42 
  -2 -10   0   46.81    1.33 
  -2 -10   0   45.52    1.40 
  -2 -10   0   43.01    1.43 
   2  10   0   43.14    1.29 
   2  10   0   44.64    1.38 
   2  10   0   44.86    1.35 
   2  10   0   46.16    1.36 
   2  10   0   44.15    1.42 
   2  10   0   44.43    1.44 
   2  10   0   44.71    1.28 
  -3 -10   0   73.33    2.00 
  -3 -10   0   73.74    1.98 
  -3 -10   0   72.57    1.90 
  -3 -10   0   71.72    2.02 
  -3 -10   0   74.54    2.23 
  -3 -10   0   74.18    2.10 
  -3 -10   0   73.73    1.98 
  -3 -10   0   75.26    1.93 
   3  10   0   73.71    1.91 
   3  10   0   71.07    1.97 
   3  10   0   70.85    1.86 
   3  10   0   73.57    1.98 
   3  10   0   71.64    2.04 
   3  10   0   73.26    1.91 
   3  10   0   74.42    1.96 
  -4 -10   0    2.18    0.33 
  -4 -10   0    1.68    0.40 
  -4 -10   0    1.76    0.44 
  -4 -10   0    1.99    0.40 
  -4 -10   0    2.53    0.38 
  -4 -10   0    1.97    0.40 
  -4 -10   0    1.29    0.46 
   4  10   0    1.72    0.36 
   4  10   0    2.42    0.42 
   4  10   0    1.58    0.34 
   4  10   0    2.11    0.37 
   4  10   0    1.31    0.39 
   4  10   0    1.74    0.33 
   4  10   0    2.28    0.37 
  -5 -10   0   24.62    1.06 
  -5 -10   0   25.82    1.20 
  -5 -10   0   24.15    0.98 
  -5 -10   0   25.90    0.90 
  -5 -10   0   25.10    1.02 
  -5 -10   0   25.22    0.93 
  -5 -10   0   27.16    1.04 
   5  10   0   24.48    0.94 
   5  10   0   25.41    0.97 
   5  10   0   24.21    1.07 
   5  10   0   25.43    0.94 
   5  10   0   25.40    0.97 
   5  10   0   25.65    1.06 
  -6 -10   0  101.90    2.61 
  -6 -10   0  104.48    2.63 
  -6 -10   0  101.44    2.53 
  -6 -10   0   98.56    2.91 
  -6 -10   0   98.22    2.60 
   6  10   0   96.83    2.70 
   6  10   0  102.52    2.47 
   6  10   0  100.06    2.48 
   6  10   0  101.40    2.63 
   6  10   0   98.46    2.65 
   6  10   0  101.17    2.50 
  -7 -10   0   37.15    1.59 
  -7 -10   0   39.82    1.37 
  -7 -10   0   40.57    1.29 
  -7 -10   0   39.70    1.35 
   7  10   0   39.48    1.42 
   7  10   0   41.24    1.26 
   7  10   0   42.07    1.31 
   7  10   0   37.36    1.45 
   7  10   0   41.89    1.45 
   7  10   0   39.68    1.30 
  -8 -10   0   34.67    1.20 
  -8 -10   0   34.37    1.25 
  -8 -10   0   35.78    1.55 
  -8 -10   0   34.73    1.28 
   8  10   0   35.98    1.13 
   8  10   0   35.41    1.25 
   8  10   0   33.28    1.32 
   8  10   0   34.25    1.36 
   8  10   0   34.34    1.21 
   8  10   0   31.64    1.38 
  -9 -10   0    0.86    0.36 
  -9 -10   0   -0.58    0.41 
  -9 -10   0    0.01    0.39 
  -9 -10   0    0.04    0.36 
  -9 -10   0   -0.02    0.28 
   9  10   0   -0.19    0.29 
   9  10   0    0.40    0.46 
   9  10   0    0.29    0.42 
   9  10   0    0.13    0.32 
   9  10   0   -0.05    0.32 
 -10 -10   0    1.15    0.47 
 -10 -10   0    0.01    0.51 
 -10 -10   0    0.74    0.42 
 -10 -10   0    1.58    0.43 
 -10 -10   0    1.24    0.39 
  10  10   0    0.81    0.39 
  10  10   0    1.36    0.51 
  10  10   0    0.62    0.42 
  10  10   0    0.42    0.49 
 -11 -10   0   -0.22    0.41 
 -11 -10   0    0.21    0.55 
 -11 -10   0    0.09    0.37 
 -11 -10   0   -0.10    0.36 
 -11 -10   0    0.63    0.46 
  11  10   0    0.05    0.37 
  11  10   0    0.07    0.46 
  11  10   0    0.02    0.40 
  11  10   0    0.29    0.52 
 -12 -10   0    4.15    0.82 
 -12 -10   0    4.73    0.68 
 -12 -10   0    4.01    0.64 
 -12 -10   0    4.49    0.70 
 -12 -10   0    5.40    0.75 
  12  10   0    3.94    0.58 
  12  10   0    2.58    0.69 
  12  10   0    3.70    0.76 
  12  10   0    2.91    0.61 
 -13 -10   0   25.02    1.29 
 -13 -10   0   24.84    1.25 
 -13 -10   0   27.22    1.30 
 -13 -10   0   24.12    1.47 
  13  10   0   24.73    1.32 
  13  10   0   25.35    1.46 
  13  10   0   26.07    1.21 
  13  10   0   26.01    1.45 
 -14 -10   0    0.06    0.57 
 -14 -10   0   -0.61    0.57 
 -14 -10   0    0.20    0.56 
 -14 -10   0   -0.53    0.57 
  14  10   0   -0.31    0.57 
  14  10   0   -0.31    0.45 
  14  10   0   -0.09    0.48 
  14  10   0    0.08    0.63 
 -15 -10   0    0.82    0.66 
  15  10   0    0.96    0.68 
  15  10   0    1.80    0.62 
  15  10   0    0.61    0.62 
  15  10   0    1.61    0.57 
   9 -11   0    0.01    0.70 
   9 -11   0    0.89    0.55 
   9 -11   0    1.76    0.76 
   9 -11   0    1.24    0.57 
  -9  11   0    1.21    0.68 
  -9  11   0    0.03    0.57 
   8 -11   0   -0.34    0.58 
   8 -11   0    0.78    0.77 
   8 -11   0   -0.24    0.46 
   8 -11   0    0.06    0.47 
  -8  11   0    0.52    0.58 
  -8  11   0    0.37    0.57 
   7 -11   0   26.63    1.49 
   7 -11   0   26.25    1.31 
   7 -11   0   28.19    1.48 
   7 -11   0   22.51    1.24 
  -7  11   0   25.59    1.28 
  -7  11   0   27.52    1.36 
  -7  11   0   26.89    1.34 
  -7  11   0   28.84    1.38 
   6 -11   0    0.16    0.57 
   6 -11   0   -0.03    0.42 
   6 -11   0   -0.29    0.44 
   6 -11   0    0.20    0.65 
  -6  11   0    0.40    0.47 
  -6  11   0    0.21    0.45 
  -6  11   0    0.17    0.40 
  -6  11   0   -0.19    0.39 
   5 -11   0    4.02    0.76 
   5 -11   0    4.75    0.64 
   5 -11   0    3.74    0.59 
   5 -11   0    4.55    0.75 
  -5  11   0    3.95    0.64 
  -5  11   0    3.73    0.59 
  -5  11   0    4.55    0.65 
  -5  11   0    3.65    0.61 
  -5  11   0    5.63    0.68 
   4 -11   0    0.83    0.56 
   4 -11   0    0.55    0.44 
   4 -11   0    0.62    0.52 
   4 -11   0   -0.09    0.40 
  -4  11   0    0.75    0.41 
  -4  11   0    0.46    0.37 
  -4  11   0    0.25    0.34 
  -4  11   0    1.15    0.44 
  -4  11   0    0.53    0.41 
   3 -11   0    4.45    0.68 
   3 -11   0    6.00    0.66 
   3 -11   0    4.55    0.68 
   3 -11   0    3.43    0.54 
  -3  11   0    5.07    0.60 
  -3  11   0    5.41    0.60 
  -3  11   0    4.63    0.60 
  -3  11   0    4.34    0.54 
  -3  11   0    4.52    0.55 
   2 -11   0   13.77    0.84 
   2 -11   0   13.47    0.92 
   2 -11   0   12.97    0.80 
   2 -11   0   13.90    0.87 
   2 -11   0   13.37    0.89 
  -2  11   0   14.09    0.74 
  -2  11   0   14.51    0.80 
  -2  11   0   14.15    0.81 
  -2  11   0   14.22    0.80 
  -2  11   0   12.81    0.84 
  -2  11   0   14.30    0.78 
   1 -11   0    3.58    0.50 
   1 -11   0    4.72    0.55 
   1 -11   0    4.49    0.63 
   1 -11   0    4.10    0.61 
   1 -11   0    3.56    0.50 
  -1  11   0    4.44    0.51 
  -1  11   0    4.81    0.57 
  -1  11   0    5.02    0.50 
  -1  11   0    4.65    0.60 
  -1  11   0    4.35    0.51 
   0 -11   0   19.39    0.98 
   0 -11   0   17.54    0.97 
   0 -11   0   19.44    0.94 
   0 -11   0   20.64    0.95 
   0 -11   0   18.75    0.84 
   0 -11   0   18.26    0.94 
   0  11   0   19.35    0.98 
   0  11   0   19.28    0.87 
   0  11   0   19.83    0.79 
   0  11   0   19.72    0.87 
   0  11   0   19.30    0.92 
  -1 -11   0   53.44    1.61 
  -1 -11   0   51.78    1.74 
  -1 -11   0   50.14    1.47 
  -1 -11   0   50.50    1.57 
  -1 -11   0   48.06    1.60 
   1  11   0   47.86    1.56 
   1  11   0   49.10    1.59 
   1  11   0   50.29    1.62 
   1  11   0   51.93    1.49 
   1  11   0   52.10    1.54 
  -2 -11   0    4.54    0.51 
  -2 -11   0    4.60    0.66 
  -2 -11   0    4.24    0.53 
  -2 -11   0    3.88    0.43 
  -2 -11   0    3.96    0.52 
  -2 -11   0    4.48    0.59 
   2  11   0    4.83    0.52 
   2  11   0    3.82    0.46 
   2  11   0    4.00    0.54 
   2  11   0    4.72    0.51 
   2  11   0    4.19    0.52 
   2  11   0    4.33    0.47 
  -3 -11   0   13.42    0.67 
  -3 -11   0   11.68    0.80 
  -3 -11   0   13.94    0.94 
  -3 -11   0   13.98    0.83 
  -3 -11   0   14.60    0.78 
  -3 -11   0   14.70    0.72 
  -3 -11   0   12.74    0.77 
   3  11   0   13.95    0.69 
   3  11   0   14.03    0.84 
   3  11   0   13.31    0.65 
   3  11   0   13.82    0.73 
   3  11   0   14.11    0.78 
   3  11   0   12.55    0.77 
  -4 -11   0    1.04    0.32 
  -4 -11   0    1.28    0.41 
  -4 -11   0    1.03    0.46 
  -4 -11   0    1.62    0.39 
  -4 -11   0    1.27    0.35 
  -4 -11   0    1.20    0.48 
  -4 -11   0    1.23    0.52 
   4  11   0    0.98    0.33 
   4  11   0    1.24    0.40 
   4  11   0    1.41    0.33 
   4  11   0    0.19    0.40 
   4  11   0    0.58    0.32 
   4  11   0    1.41    0.35 
  -5 -11   0   50.28    1.51 
  -5 -11   0   49.99    1.61 
  -5 -11   0   52.27    1.64 
  -5 -11   0   48.11    1.84 
  -5 -11   0   51.03    1.65 
   5  11   0   49.18    1.51 
   5  11   0   51.90    1.50 
   5  11   0   50.36    1.64 
   5  11   0   49.15    1.53 
   5  11   0   49.27    1.68 
   5  11   0   50.72    1.55 
  -6 -11   0  120.49    3.05 
  -6 -11   0  118.53    2.99 
  -6 -11   0  122.15    3.10 
  -6 -11   0  110.43    3.35 
   6  11   0  121.67    2.93 
   6  11   0  119.55    3.07 
   6  11   0  115.33    3.14 
   6  11   0  125.39    2.93 
   6  11   0  120.24    3.09 
   6  11   0  119.71    2.91 
  -7 -11   0  132.54    3.90 
  -7 -11   0  148.28    3.60 
  -7 -11   0  144.69    3.55 
  -7 -11   0  141.64    3.48 
   7  11   0  141.15    3.68 
   7  11   0  144.62    3.34 
   7  11   0  139.93    3.63 
   7  11   0  143.13    3.42 
   7  11   0  146.98    3.60 
   7  11   0  144.64    3.40 
  -8 -11   0    8.10    0.93 
  -8 -11   0    9.43    0.72 
  -8 -11   0   10.31    0.81 
  -8 -11   0    9.37    0.66 
   8  11   0   10.14    0.80 
   8  11   0    9.44    0.60 
   8  11   0   10.29    0.79 
   8  11   0   10.17    0.90 
   8  11   0   10.23    0.72 
   8  11   0    9.71    0.72 
  -9 -11   0   11.68    0.84 
  -9 -11   0   11.07    0.79 
  -9 -11   0   11.53    0.77 
  -9 -11   0   10.18    1.05 
   9  11   0   10.71    0.75 
   9  11   0   11.08    0.89 
   9  11   0   11.37    0.88 
   9  11   0   11.66    0.79 
   9  11   0    9.95    0.92 
 -10 -11   0   13.85    0.90 
 -10 -11   0   12.90    0.93 
 -10 -11   0   15.11    0.94 
 -10 -11   0   12.99    1.09 
 -10 -11   0   13.79    0.85 
  10  11   0   14.31    0.87 
  10  11   0   14.17    0.89 
  10  11   0   13.18    0.94 
  10  11   0   14.50    1.03 
  10  11   0   11.57    1.02 
 -11 -11   0   32.97    1.37 
 -11 -11   0   30.60    1.40 
 -11 -11   0   30.11    1.29 
 -11 -11   0   28.68    1.56 
  11  11   0   31.07    1.41 
  11  11   0   30.46    1.46 
  11  11   0   29.09    1.47 
  11  11   0   31.42    1.27 
 -12 -11   0   38.65    1.57 
 -12 -11   0   33.30    1.76 
  12  11   0   37.27    1.71 
  12  11   0   36.45    1.58 
  12  11   0   38.35    1.72 
  12  11   0   38.02    1.43 
 -13 -11   0    0.22    0.60 
 -13 -11   0    0.89    0.57 
  13  11   0    0.79    0.67 
  13  11   0    0.46    0.52 
  13  11   0    1.39    0.52 
  13  11   0    1.06    0.61 
 -14 -11   0    1.31    0.72 
 -14 -11   0    1.96    0.68 
  14  11   0    2.02    0.55 
  14  11   0    1.14    0.59 
  14  11   0    1.79    0.78 
  14  11   0    0.82    0.61 
   8 -12   0    2.83    0.81 
   8 -12   0    3.52    0.70 
   8 -12   0    2.71    0.68 
   8 -12   0    3.23    0.84 
  -8  12   0    3.72    0.76 
   7 -12   0    2.68    0.79 
   7 -12   0    4.69    0.74 
   7 -12   0    1.84    0.63 
   7 -12   0    3.51    0.85 
  -7  12   0    3.36    0.70 
  -7  12   0    2.44    0.60 
   6 -12   0    0.31    0.53 
   6 -12   0    0.17    0.51 
   6 -12   0    0.74    0.54 
   6 -12   0   -0.42    0.65 
  -6  12   0   -0.07    0.42 
  -6  12   0    0.37    0.47 
  -6  12   0    1.10    0.58 
   5 -12   0    2.15    0.59 
   5 -12   0    0.69    0.55 
   5 -12   0    1.97    0.52 
   5 -12   0    1.79    0.69 
  -5  12   0    1.89    0.51 
  -5  12   0    1.59    0.53 
  -5  12   0    1.72    0.52 
   4 -12   0    0.60    0.49 
   4 -12   0    1.27    0.49 
   4 -12   0    0.30    0.56 
   4 -12   0    1.79    0.66 
  -4  12   0    1.61    0.46 
  -4  12   0    1.59    0.50 
  -4  12   0    1.80    0.52 
   3 -12   0    0.30    0.54 
   3 -12   0    0.10    0.40 
   3 -12   0    0.15    0.52 
   3 -12   0   -0.03    0.45 
  -3  12   0    0.89    0.41 
  -3  12   0    0.60    0.40 
  -3  12   0    0.19    0.41 
   2 -12   0    0.89    0.43 
   2 -12   0    0.10    0.42 
   2 -12   0    0.63    0.50 
   2 -12   0    0.28    0.49 
  -2  12   0    0.63    0.40 
  -2  12   0    0.47    0.37 
  -2  12   0    0.80    0.40 
   1 -12   0   18.48    1.02 
   1 -12   0   16.53    0.94 
   1 -12   0   15.95    1.00 
   1 -12   0   17.22    1.00 
  -1  12   0   17.58    0.88 
  -1  12   0   16.78    0.90 
  -1  12   0   19.20    1.05 
   0 -12   0   77.66    2.31 
   0 -12   0   75.72    2.14 
   0 -12   0   70.68    2.19 
   0 -12   0   75.09    2.19 
   0  12   0   71.25    2.13 
   0  12   0   71.35    2.19 
   0  12   0   75.92    2.06 
  -1 -12   0   36.83    1.36 
  -1 -12   0   36.50    1.41 
  -1 -12   0   36.60    1.47 
  -1 -12   0   37.62    1.34 
   1  12   0   37.88    1.38 
   1  12   0   36.59    1.23 
   1  12   0   37.77    1.41 
  -2 -12   0    9.72    0.76 
  -2 -12   0   10.05    0.80 
  -2 -12   0   11.79    0.83 
  -2 -12   0   10.74    0.88 
  -2 -12   0   11.91    0.73 
   2  12   0   11.11    0.67 
   2  12   0   11.85    0.81 
   2  12   0   11.53    0.79 
  -3 -12   0    1.52    0.41 
  -3 -12   0    1.13    0.41 
  -3 -12   0    1.59    0.54 
  -3 -12   0    0.99    0.49 
   3  12   0    1.11    0.47 
   3  12   0    1.27    0.36 
   3  12   0    1.50    0.41 
   3  12   0    0.70    0.37 
  -4 -12   0    2.22    0.47 
  -4 -12   0    2.09    0.57 
  -4 -12   0    1.96    0.50 
  -4 -12   0    2.64    0.60 
   4  12   0    2.41    0.42 
   4  12   0    2.41    0.42 
   4  12   0    1.92    0.43 
   4  12   0    1.61    0.51 
   4  12   0    2.65    0.46 
   4  12   0    2.44    0.53 
  -5 -12   0  101.13    2.79 
  -5 -12   0  102.49    3.09 
   5  12   0  103.13    2.64 
   5  12   0  104.09    2.71 
   5  12   0  103.30    2.87 
   5  12   0  103.44    2.68 
   5  12   0  106.78    2.81 
   5  12   0  103.42    2.61 
  -6 -12   0  102.47    2.74 
  -6 -12   0   96.37    3.05 
   6  12   0   99.53    2.75 
   6  12   0  103.36    2.61 
   6  12   0  101.23    2.85 
   6  12   0   99.54    2.60 
   6  12   0  103.25    2.62 
   6  12   0   98.68    2.70 
  -7 -12   0   36.70    1.40 
  -7 -12   0   33.07    1.62 
   7  12   0   35.77    1.31 
   7  12   0   38.89    1.32 
   7  12   0   35.30    1.49 
   7  12   0   36.76    1.45 
   7  12   0   37.73    1.40 
  -8 -12   0    0.81    0.47 
  -8 -12   0    0.04    0.54 
   8  12   0    0.56    0.37 
   8  12   0    0.08    0.46 
   8  12   0   -0.09    0.39 
   8  12   0    0.75    0.44 
   8  12   0    0.70    0.29 
  -9 -12   0    0.13    0.56 
  -9 -12   0   -0.51    0.41 
   9  12   0    0.23    0.52 
   9  12   0   -0.31    0.36 
   9  12   0    0.15    0.45 
   9  12   0    0.28    0.38 
 -10 -12   0    2.80    0.64 
 -10 -12   0    2.58    0.76 
  10  12   0    3.25    0.55 
  10  12   0    2.59    0.69 
  10  12   0    2.73    0.58 
  10  12   0    3.06    0.66 
 -11 -12   0   14.19    1.02 
 -11 -12   0   15.17    1.40 
  11  12   0   12.88    1.16 
  11  12   0   15.74    1.14 
  11  12   0   14.04    1.08 
  11  12   0   14.26    0.94 
 -12 -12   0   17.05    1.40 
 -12 -12   0   22.11    1.22 
  12  12   0   20.62    1.10 
  12  12   0   21.59    1.33 
  12  12   0   22.30    1.34 
  12  12   0   19.51    1.27 
 -13 -12   0    1.38    0.66 
 -13 -12   0    4.13    0.92 
  13  12   0    2.03    0.70 
  13  12   0    0.74    0.59 
  13  12   0    2.19    0.78 
  13  12   0    2.03    0.57 
 -14 -12   0   -0.01    0.62 
  14  12   0   -0.16    0.47 
  14  12   0    0.59    0.57 
  14  12   0   -1.07    0.60 
  14  12   0   -0.65    0.58 
   6 -13   0    0.43    0.61 
   6 -13   0    0.04    0.48 
   6 -13   0   -0.44    0.52 
   6 -13   0    0.52    0.70 
  -6  13   0   -0.01    0.46 
   5 -13   0   25.15    1.31 
   5 -13   0   24.75    1.30 
   5 -13   0   24.16    1.43 
   5 -13   0   24.92    1.44 
  -5  13   0   23.32    1.29 
   4 -13   0   -0.20    0.48 
   4 -13   0    0.89    0.53 
   4 -13   0    0.30    0.59 
   4 -13   0    0.36    0.65 
  -4  13   0    1.83    0.52 
  -4  13   0    0.61    0.47 
   3 -13   0   -0.29    0.56 
   3 -13   0    0.09    0.44 
   3 -13   0    0.01    0.49 
   3 -13   0    0.46    0.58 
  -3  13   0    0.24    0.43 
  -3  13   0    0.00    0.38 
   2 -13   0    4.64    0.75 
   2 -13   0    3.02    0.56 
   2 -13   0    5.66    0.72 
   2 -13   0    5.31    0.78 
  -2  13   0    6.49    0.73 
  -2  13   0    4.55    0.67 
   1 -13   0   34.74    1.48 
   1 -13   0   34.98    1.47 
   1 -13   0   35.85    1.42 
  -1  13   0   33.07    1.45 
  -1  13   0   35.60    1.38 
   0 -13   0   76.12    2.26 
   0 -13   0   73.81    2.36 
   0 -13   0   72.13    2.27 
   0  13   0   73.01    2.26 
   0  13   0   76.25    2.24 
  -1 -13   0   35.22    1.37 
  -1 -13   0   35.69    1.51 
  -1 -13   0   35.73    1.40 
  -1 -13   0   33.57    1.43 
   1  13   0   36.98    1.46 
   1  13   0   34.05    1.36 
  -2 -13   0    0.38    0.45 
  -2 -13   0    0.44    0.38 
  -2 -13   0    1.36    0.53 
  -2 -13   0    0.79    0.42 
   2  13   0    0.97    0.43 
   2  13   0    1.12    0.42 
  -3 -13   0   28.77    1.30 
  -3 -13   0   31.17    1.45 
   3  13   0   31.27    1.35 
   3  13   0   32.36    1.30 
  -4 -13   0    4.59    0.77 
  -4 -13   0    4.42    0.69 
   4  13   0    5.74    0.72 
   4  13   0    5.31    0.63 
  -5 -13   0   60.49    2.29 
  -5 -13   0   63.83    2.06 
   5  13   0   65.39    1.96 
   5  13   0   65.58    2.14 
   5  13   0   65.57    1.98 
  -6 -13   0   34.25    1.65 
  -6 -13   0   34.83    1.44 
   6  13   0   33.83    1.32 
   6  13   0   32.01    1.27 
   6  13   0   32.99    1.49 
   6  13   0   33.43    1.29 
  -7 -13   0    6.33    0.95 
  -7 -13   0    4.75    0.71 
   7  13   0    3.73    0.69 
   7  13   0    6.99    0.71 
   7  13   0    6.53    0.66 
   7  13   0    6.36    0.65 
  -8 -13   0   -0.41    0.49 
  -8 -13   0   -0.25    0.52 
   8  13   0    0.02    0.24 
   8  13   0   -0.08    0.41 
   8  13   0   -0.07    0.50 
   8  13   0    0.20    0.43 
   8  13   0    0.21    0.39 
  -9 -13   0   -0.23    0.48 
  -9 -13   0    0.50    0.60 
   9  13   0    0.40    0.56 
   9  13   0    1.42    0.54 
   9  13   0    0.56    0.40 
   9  13   0    0.32    0.47 
 -10 -13   0    0.71    0.57 
 -10 -13   0    0.18    0.58 
  10  13   0   -0.51    0.45 
  10  13   0   -0.11    0.39 
  10  13   0    0.01    0.51 
  10  13   0   -0.03    0.57 
 -11 -13   0    1.04    0.68 
 -11 -13   0    1.15    0.62 
  11  13   0    0.57    0.60 
  11  13   0    0.45    0.54 
  11  13   0    0.81    0.62 
  11  13   0    0.94    0.50 
 -12 -13   0   -0.14    0.57 
 -12 -13   0   -0.14    0.61 
  12  13   0    0.67    0.56 
  12  13   0    0.57    0.49 
  12  13   0   -0.23    0.57 
  12  13   0    0.03    0.56 
 -13 -13   0    9.32    1.04 
 -13 -13   0    9.74    1.25 
  13  13   0    9.29    0.89 
  13  13   0    9.11    1.07 
  13  13   0    9.10    1.08 
   5 -14   0    0.88    0.71 
   5 -14   0    0.09    0.60 
   5 -14   0    0.84    0.62 
  -5  14   0    1.15    0.55 
   4 -14   0    3.74    0.69 
   4 -14   0    4.89    0.87 
   4 -14   0    4.62    0.85 
  -4  14   0    4.24    0.72 
   3 -14   0   -0.21    0.59 
   3 -14   0    0.00    0.58 
   3 -14   0    0.24    0.47 
  -3  14   0    0.18    0.46 
  -3  14   0    0.09    0.46 
   2 -14   0    7.83    0.81 
   2 -14   0   10.73    1.02 
   2 -14   0    8.66    0.94 
  -2  14   0   11.02    0.87 
  -2  14   0   10.36    0.99 
   1 -14   0   21.57    1.23 
   1 -14   0   19.77    1.19 
  -1  14   0   22.10    1.13 
  -1  14   0   21.81    1.25 
   0 -14   0   22.90    1.19 
   0 -14   0   23.43    1.21 
   0 -14   0   20.53    1.20 
   0  14   0   23.54    1.26 
   0  14   0   22.62    1.14 
  -1 -14   0   21.68    1.20 
  -1 -14   0   19.91    1.17 
  -1 -14   0   21.30    1.13 
   1  14   0   20.99    1.17 
   1  14   0   21.25    1.14 
  -2 -14   0    0.20    0.48 
  -2 -14   0    0.18    0.51 
  -2 -14   0    0.39    0.46 
   2  14   0   -0.83    0.37 
   2  14   0    0.27    0.39 
  -3 -14   0   26.46    1.30 
  -3 -14   0   25.26    1.40 
   3  14   0   28.03    1.27 
   3  14   0   28.37    1.36 
  -4 -14   0   59.34    2.02 
  -4 -14   0   54.30    2.16 
   4  14   0   63.08    2.10 
   4  14   0   61.88    1.99 
  -5 -14   0   31.82    1.42 
  -5 -14   0   29.94    1.59 
   5  14   0   31.24    1.34 
   5  14   0   30.31    1.40 
  -6 -14   0    0.10    0.58 
  -6 -14   0    0.56    0.52 
   6  14   0    0.34    0.34 
   6  14   0    0.09    0.45 
  -7 -14   0   -0.31    0.53 
  -7 -14   0    0.36    0.60 
   7  14   0    0.03    0.47 
   7  14   0    0.32    0.35 
  -8 -14   0    3.18    0.70 
  -8 -14   0    2.69    0.79 
   8  14   0    3.68    0.65 
   8  14   0    3.07    0.68 
   8  14   0    3.93    0.56 
   8  14   0    3.45    0.65 
  -9 -14   0    6.47    1.02 
  -9 -14   0    5.64    0.79 
   9  14   0    5.25    0.70 
   9  14   0    6.17    0.86 
   9  14   0    6.43    0.74 
 -10 -14   0    1.93    0.76 
 -10 -14   0   -0.27    0.55 
  10  14   0    0.45    0.49 
  10  14   0    0.79    0.55 
  10  14   0    0.19    0.49 
 -11 -14   0    0.12    0.59 
 -11 -14   0    0.01    0.59 
  11  14   0   -0.17    0.62 
  11  14   0    0.71    0.60 
  11  14   0   -0.22    0.47 
 -12 -14   0    3.41    0.87 
 -12 -14   0    3.10    0.77 
  12  14   0    2.62    0.75 
  12  14   0    3.67    0.82 
  12  14   0    4.42    0.67 
 -13 -14   0    9.41    1.01 
 -13 -14   0    9.59    1.30 
  13  14   0   10.92    1.17 
  13  14   0    9.44    0.92 
  13  14   0    9.15    1.09 
   3 -15   0    2.25    0.65 
   3 -15   0    5.94    0.87 
   3 -15   0    6.48    0.98 
  -3  15   0    3.60    0.71 
   2 -15   0   32.93    1.61 
   2 -15   0   29.70    1.57 
  -2  15   0   33.79    1.49 
  -2  15   0   32.89    1.59 
   1 -15   0   21.83    1.30 
   1 -15   0   17.66    1.26 
  -1  15   0   18.99    1.28 
  -1  15   0   20.35    1.16 
   0 -15   0    0.81    0.61 
   0 -15   0    0.32    0.57 
   0  15   0    1.73    0.54 
   0  15   0    1.40    0.55 
  -1 -15   0    0.92    0.60 
   1  15   0    1.57    0.50 
   1  15   0    1.09    0.53 
  -2 -15   0    2.38    0.67 
  -2 -15   0    2.18    0.68 
   2  15   0    2.04    0.62 
   2  15   0    2.47    0.57 
  -3 -15   0   18.46    1.19 
  -3 -15   0   19.95    1.31 
   3  15   0   22.60    1.20 
   3  15   0   20.91    1.26 
  -4 -15   0   51.48    1.93 
  -4 -15   0   51.87    2.15 
   4  15   0   56.17    2.05 
   4  15   0   51.97    1.89 
  -5 -15   0   12.68    1.33 
  -5 -15   0   13.42    1.05 
   5  15   0   13.31    0.97 
   5  15   0   12.67    1.12 
  -6 -15   0    6.89    1.07 
  -6 -15   0    4.29    0.78 
   6  15   0    5.16    0.81 
   6  15   0    4.48    0.65 
  -7 -15   0    0.86    0.68 
  -7 -15   0    1.40    0.66 
   7  15   0    0.48    0.38 
   7  15   0    0.14    0.56 
  -8 -15   0    6.67    0.92 
  -8 -15   0    6.19    1.02 
   8  15   0    5.30    0.87 
   8  15   0    6.09    0.71 
  -9 -15   0    6.47    0.94 
  -9 -15   0    8.59    1.23 
   9  15   0    6.95    0.94 
 -10 -15   0    3.41    0.79 
 -10 -15   0    3.43    0.88 
  10  15   0    3.81    0.83 
  10  15   0    2.86    0.68 
 -11 -15   0   -0.28    0.64 
 -11 -15   0   -0.74    0.62 
  11  15   0   -0.88    0.54 
  11  15   0    0.34    0.57 
 -12 -15   0   -0.04    0.66 
 -12 -15   0   -0.19    0.58 
  12  15   0    0.08    0.60 
  12  15   0   -0.45    0.59 
   1 -16   0   24.30    1.44 
   1 -16   0   30.75    1.57 
  -1  16   0   29.52    1.53 
  -1  16   0   28.83    1.55 
   0 -16   0    0.35    0.65 
   0  16   0    0.62    0.52 
   0  16   0    0.46    0.51 
  -1 -16   0    2.15    0.73 
   1  16   0    2.31    0.60 
   1  16   0    2.43    0.67 
  -2 -16   0    0.15    0.60 
   2  16   0    0.24    0.50 
   2  16   0    0.37    0.56 
  -3 -16   0   34.05    1.75 
  -3 -16   0   32.63    1.60 
   3  16   0   35.74    1.65 
   3  16   0   33.61    1.56 
  -4 -16   0   23.78    1.54 
  -4 -16   0   23.96    1.37 
   4  16   0   27.76    1.50 
   4  16   0   23.18    1.30 
  -5 -16   0    0.95    0.73 
  -5 -16   0   -0.47    0.57 
   5  16   0    0.38    0.61 
   5  16   0    0.81    0.48 
  -6 -16   0    1.90    0.68 
  -6 -16   0    1.73    0.79 
   6  16   0    0.80    0.62 
   6  16   0    1.20    0.51 
  -7 -16   0   -0.15    0.64 
  -7 -16   0   -0.08    0.61 
   7  16   0    0.31    0.44 
   7  16   0    1.28    0.65 
  -8 -16   0    0.11    0.67 
  -8 -16   0    0.12    0.65 
   8  16   0    0.74    0.68 
   8  16   0   -0.30    0.42 
  -9 -16   0   -0.20    0.70 
  -9 -16   0    1.30    0.76 
   9  16   0   -1.58    0.55 
 -10 -16   0    0.06    0.77 
 -10 -16   0    0.92    0.73 
  10  16   0   -0.41    0.60 
  -1 -17   0    2.03    0.72 
   1  17   0    1.63    0.68 
   1  17   0    1.75    0.57 
  -2 -17   0    8.96    1.03 
   2  17   0    9.89    1.04 
   2  17   0   13.23    1.18 
  -3 -17   0   21.47    1.37 
  -3 -17   0   17.00    1.59 
   3  17   0   21.89    1.40 
  -4 -17   0    7.70    1.20 
  -4 -17   0    5.82    0.91 
   4  17   0    6.73    0.94 
   4  17   0    5.31    0.79 
  -5 -17   0    0.20    0.71 
  -5 -17   0    0.64    0.64 
   5  17   0    0.27    0.47 
   5  17   0    1.43    0.68 
  -6 -17   0    0.07    0.72 
  -6 -17   0    0.50    0.69 
   6  17   0    0.27    0.62 
   6  17   0    0.17    0.48 
  -7 -17   0    1.19    0.72 
  -7 -17   0    1.47    0.82 
   7  17   0    2.05    0.61 
   7  17   0    1.96    0.73 
  -8 -17   0    1.10    0.83 
  -8 -17   0    1.12    0.73 
   8  17   0    0.72    0.54 
   8  17   0   -0.36    0.61 
   6  17  -1    0.40    0.62 
   6  17  -1   -0.98    0.40 
  -6 -17   1    0.30    0.65 
  -6 -17   1   -0.36    0.61 
   5  17  -1    4.92    0.86 
   5  17  -1    4.64    0.74 
  -5 -17   1    5.63    0.90 
  -5 -17   1    7.48    1.19 
   4  17  -1   23.34    1.48 
   4  17  -1   23.64    1.37 
  -4 -17   1   22.32    1.62 
  -4 -17   1   20.77    1.40 
   3  17  -1   24.73    1.51 
  -3 -17   1   22.96    1.43 
   9  16  -1   30.40    1.69 
  -9 -16   1   27.97    1.52 
  -9 -16   1   24.93    1.71 
   8  16  -1   14.89    1.08 
   8  16  -1   14.45    1.30 
  -8 -16   1   13.97    1.24 
  -8 -16   1   13.83    1.46 
   7  16  -1    9.63    1.09 
   7  16  -1    8.80    0.90 
  -7 -16   1   10.31    1.05 
  -7 -16   1   10.88    1.27 
   6  16  -1    3.12    0.59 
   6  16  -1    3.22    0.77 
  -6 -16   1    2.30    0.74 
  -6 -16   1    2.94    0.86 
   5  16  -1   31.29    1.64 
   5  16  -1   30.49    1.49 
  -5 -16   1   29.49    1.52 
  -5 -16   1   27.98    1.71 
   4  16  -1   35.29    1.73 
  -4 -16   1   35.01    1.66 
  -4 -16   1   34.89    1.84 
   3  16  -1    0.55    0.62 
   3  16  -1    0.06    0.46 
  -3 -16   1    0.63    0.64 
  -3 -16   1   -0.27    0.61 
   2  16  -1    2.22    0.60 
   2  16  -1    3.75    0.77 
  -2 -16   1    2.19    0.72 
   1  16  -1   -0.40    0.53 
   1  16  -1    0.32    0.43 
  -1 -16   1    0.52    0.66 
   0  16  -1    1.43    0.60 
   0  16  -1    0.82    0.51 
   0 -16   1    0.68    0.62 
  -1  16  -1    3.53    0.74 
  -1  16  -1    2.96    0.70 
   1 -16   1    3.46    0.73 
   1 -16   1    5.72    0.92 
  11  15  -1   48.21    2.11 
 -11 -15   1   42.60    2.18 
 -11 -15   1   45.49    1.88 
  10  15  -1   46.66    2.05 
 -10 -15   1   52.02    1.97 
 -10 -15   1   41.49    2.13 
   9  15  -1    9.38    1.08 
  -9 -15   1    7.59    0.98 
  -9 -15   1    7.66    1.11 
   8  15  -1    0.88    0.43 
   8  15  -1    0.23    0.59 
  -8 -15   1    1.02    0.64 
  -8 -15   1    1.03    0.65 
   7  15  -1   -0.15    0.37 
   7  15  -1    0.02    0.59 
  -7 -15   1    0.16    0.68 
  -7 -15   1   -0.69    0.56 
   6  15  -1    5.30    0.70 
   6  15  -1    6.08    0.87 
  -6 -15   1    5.91    0.86 
  -6 -15   1    5.37    1.00 
   5  15  -1   19.96    1.17 
   5  15  -1   22.20    1.34 
  -5 -15   1   20.27    1.24 
  -5 -15   1   18.69    1.42 
   4  15  -1    5.43    0.74 
   4  15  -1    5.29    0.82 
  -4 -15   1    5.77    1.01 
  -4 -15   1    6.43    0.85 
   3  15  -1   -0.73    0.47 
   3  15  -1    0.36    0.41 
  -3 -15   1    0.56    0.60 
  -3 -15   1   -0.25    0.62 
   2  15  -1    0.57    0.45 
   2  15  -1   -0.28    0.49 
  -2 -15   1   -0.20    0.55 
  -2 -15   1    0.04    0.56 
   1  15  -1    0.74    0.47 
   1  15  -1   -0.03    0.42 
  -1 -15   1    0.66    0.61 
  -1 -15   1    0.24    0.61 
   0  15  -1    0.54    0.51 
   0  15  -1    0.24    0.49 
   0 -15   1    0.02    0.58 
   0 -15   1    0.95    0.61 
  -1  15  -1    3.08    0.66 
  -1  15  -1    2.58    0.67 
   1 -15   1    3.08    0.76 
   1 -15   1    3.23    0.73 
   1 -15   1    2.14    0.61 
  -2  15  -1    7.76    0.88 
  -2  15  -1    5.97    0.85 
   2 -15   1    4.04    0.72 
   2 -15   1    4.87    0.86 
   2 -15   1    4.15    0.81 
  -3  15  -1   26.38    1.50 
  -3  15  -1   29.42    1.43 
   3 -15   1   30.97    1.65 
   3 -15   1   26.10    1.48 
  12  14  -1   23.70    1.51 
  12  14  -1   24.08    1.45 
 -12 -14   1   19.88    1.52 
  11  14  -1   51.16    2.00 
  11  14  -1   52.31    2.14 
 -11 -14   1   50.48    1.92 
 -11 -14   1   46.86    2.22 
  10  14  -1   30.47    1.46 
  10  14  -1   31.52    1.61 
 -10 -14   1   30.47    1.48 
 -10 -14   1   27.06    1.68 
   9  14  -1    9.80    0.95 
   9  14  -1   10.15    1.08 
  -9 -14   1    9.96    1.22 
  -9 -14   1   10.85    1.03 
   8  14  -1    0.47    0.59 
   8  14  -1    0.27    0.35 
  -8 -14   1    1.35    0.74 
  -8 -14   1    0.78    0.61 
   7  14  -1   14.90    0.93 
   7  14  -1   12.23    1.12 
  -7 -14   1   14.04    1.36 
  -7 -14   1   13.78    1.03 
   6  14  -1    5.36    0.78 
   6  14  -1    5.33    0.67 
  -6 -14   1    6.24    0.80 
  -6 -14   1    4.93    0.89 
   5  14  -1   17.78    1.15 
   5  14  -1   17.94    1.03 
  -5 -14   1   17.17    1.11 
  -5 -14   1   16.51    1.25 
   4  14  -1    1.22    0.54 
   4  14  -1    1.33    0.46 
  -4 -14   1    0.46    0.62 
  -4 -14   1    2.39    0.63 
   3  14  -1    2.86    0.56 
   3  14  -1    2.02    0.62 
  -3 -14   1    1.79    0.65 
  -3 -14   1    3.60    0.69 
   2  14  -1    0.83    0.44 
   2  14  -1    0.44    0.50 
  -2 -14   1    1.49    0.58 
  -2 -14   1    0.25    0.49 
  -2 -14   1    0.97    0.56 
   1  14  -1    1.15    0.46 
   1  14  -1    0.80    0.50 
  -1 -14   1    0.58    0.50 
  -1 -14   1    0.21    0.53 
  -1 -14   1    1.54    0.63 
  -1 -14   1   -0.07    0.45 
   0  14  -1   -0.16    0.41 
   0  14  -1   -0.03    0.41 
   0 -14   1    0.38    0.51 
   0 -14   1   -0.03    0.55 
   0 -14   1    0.00    0.47 
  -1  14  -1   -0.26    0.46 
  -1  14  -1   -0.26    0.40 
   1 -14   1   -0.13    0.55 
   1 -14   1   -0.29    0.42 
   1 -14   1    0.75    0.59 
  -2  14  -1   15.81    1.12 
  -2  14  -1   18.06    1.09 
   2 -14   1   15.96    1.19 
   2 -14   1   15.29    1.20 
  -3  14  -1   15.50    1.12 
  -3  14  -1   16.34    1.07 
   3 -14   1   11.55    1.11 
   3 -14   1   15.66    1.24 
  -4  14  -1   -0.25    0.47 
  -4  14  -1    0.61    0.51 
   4 -14   1   -0.43    0.49 
   4 -14   1    0.21    0.60 
   4 -14   1    0.90    0.68 
  13  13  -1   23.99    1.52 
  13  13  -1   27.35    1.59 
  13  13  -1   25.04    1.30 
 -13 -13   1   23.06    1.61 
  12  13  -1   58.95    2.27 
  12  13  -1   58.04    2.22 
  12  13  -1   54.09    1.91 
 -12 -13   1   51.98    2.36 
 -12 -13   1   59.09    2.05 
  11  13  -1   19.92    1.34 
  11  13  -1   21.53    1.16 
  11  13  -1   19.43    1.26 
 -11 -13   1   19.59    1.42 
 -11 -13   1   22.18    1.24 
  10  13  -1   12.42    0.96 
  10  13  -1   10.35    1.06 
  10  13  -1   12.12    1.06 
 -10 -13   1   12.75    1.34 
 -10 -13   1   12.97    1.08 
   9  13  -1    2.76    0.71 
   9  13  -1    2.91    0.61 
  -9 -13   1    2.76    0.65 
  -9 -13   1    1.47    0.69 
   8  13  -1    0.25    0.42 
   8  13  -1   -0.21    0.48 
   8  13  -1    0.32    0.31 
  -8 -13   1    0.11    0.52 
  -8 -13   1    0.86    0.62 
   7  13  -1   18.33    0.99 
   7  13  -1   19.77    1.24 
   7  13  -1   21.28    1.04 
  -7 -13   1   18.04    1.33 
  -7 -13   1   19.19    1.11 
   6  13  -1   10.65    0.98 
   6  13  -1   10.52    0.79 
  -6 -13   1   10.04    1.10 
  -6 -13   1   12.02    0.93 
   5  13  -1    5.49    0.77 
   5  13  -1    4.80    0.59 
  -5 -13   1    6.53    0.78 
  -5 -13   1    5.08    0.84 
   4  13  -1    4.31    0.59 
   4  13  -1    5.52    0.75 
  -4 -13   1    3.99    0.68 
  -4 -13   1    5.24    0.85 
   3  13  -1    1.18    0.41 
   3  13  -1    1.07    0.51 
  -3 -13   1    0.40    0.49 
  -3 -13   1    1.26    0.50 
  -3 -13   1    1.02    0.48 
  -3 -13   1    1.19    0.46 
   2  13  -1   -0.23    0.40 
   2  13  -1    0.44    0.37 
  -2 -13   1   -0.23    0.48 
  -2 -13   1   -0.30    0.37 
  -2 -13   1   -0.20    0.32 
  -2 -13   1    0.89    0.49 
   1  13  -1    0.11    0.36 
   1  13  -1    0.79    0.42 
  -1 -13   1    0.35    0.42 
  -1 -13   1   -0.25    0.39 
  -1 -13   1    0.00    0.42 
  -1 -13   1    1.06    0.54 
  -1 -13   1    0.23    0.37 
   0  13  -1    5.13    0.70 
   0  13  -1    5.48    0.69 
   0 -13   1    5.05    0.72 
   0 -13   1    5.29    0.63 
   0 -13   1    6.30    0.79 
  -1  13  -1   28.31    1.26 
  -1  13  -1   26.92    1.31 
   1 -13   1   26.07    1.24 
   1 -13   1   28.36    1.39 
   1 -13   1   28.76    1.30 
   1 -13   1   26.32    1.31 
  -2  13  -1   14.70    0.96 
  -2  13  -1   14.92    1.03 
   2 -13   1   14.60    1.00 
   2 -13   1   13.79    1.04 
   2 -13   1   15.31    1.12 
  -3  13  -1    1.81    0.56 
  -3  13  -1    1.42    0.52 
   3 -13   1    1.41    0.66 
   3 -13   1    0.50    0.51 
   3 -13   1    0.98    0.52 
   3 -13   1    1.28    0.63 
  -4  13  -1    2.35    0.58 
  -4  13  -1    1.70    0.56 
   4 -13   1    1.12    0.66 
   4 -13   1    0.72    0.53 
   4 -13   1    1.90    0.56 
   4 -13   1    1.62    0.68 
  -5  13  -1   13.28    1.02 
  -5  13  -1   12.02    1.08 
   5 -13   1   13.60    1.07 
   5 -13   1   14.34    1.09 
   5 -13   1   16.24    1.24 
   5 -13   1   11.06    1.14 
  -6  13  -1    9.03    0.95 
   6 -13   1    9.73    0.96 
   6 -13   1    8.23    1.03 
   6 -13   1   12.90    1.19 
   6 -13   1   10.48    1.02 
  14  12  -1    2.33    0.62 
  14  12  -1    2.94    0.85 
  14  12  -1    3.59    0.87 
 -14 -12   1    1.40    0.75 
  13  12  -1    8.25    0.85 
  13  12  -1    6.10    0.97 
  13  12  -1    8.09    1.01 
 -13 -12   1    9.64    1.23 
  12  12  -1   43.54    1.64 
  12  12  -1   44.90    1.89 
  12  12  -1   45.58    1.95 
 -12 -12   1   47.60    1.76 
 -12 -12   1   40.91    2.04 
  11  12  -1   42.44    1.56 
  11  12  -1   46.80    1.84 
  11  12  -1   42.90    1.86 
 -11 -12   1   44.66    1.69 
 -11 -12   1   37.55    1.90 
  10  12  -1   17.60    1.21 
  10  12  -1   19.11    1.03 
  10  12  -1   19.35    1.16 
 -10 -12   1   17.24    1.28 
 -10 -12   1   19.10    1.09 
   9  12  -1    4.20    0.67 
   9  12  -1    4.23    0.75 
   9  12  -1    4.83    0.61 
  -9 -12   1    4.25    0.69 
  -9 -12   1    3.03    0.80 
   8  12  -1    5.77    0.78 
   8  12  -1    5.74    0.69 
   8  12  -1    5.42    0.56 
   8  12  -1    6.04    0.63 
  -8 -12   1    5.52    0.71 
  -8 -12   1    5.08    0.88 
   7  12  -1   36.18    1.54 
   7  12  -1   34.49    1.33 
   7  12  -1   35.23    1.29 
   7  12  -1   32.72    1.29 
  -7 -12   1   33.58    1.65 
  -7 -12   1   36.87    1.39 
   6  12  -1   12.64    0.77 
   6  12  -1   12.41    0.77 
   6  12  -1   13.39    0.97 
   6  12  -1   12.23    0.81 
  -6 -12   1   13.29    0.89 
  -6 -12   1   11.61    1.12 
   5  12  -1    0.35    0.38 
   5  12  -1    0.16    0.30 
   5  12  -1    0.07    0.45 
  -5 -12   1   -0.13    0.51 
  -5 -12   1    0.19    0.47 
   4  12  -1    0.20    0.45 
   4  12  -1    0.11    0.30 
  -4 -12   1    0.13    0.36 
  -4 -12   1   -0.03    0.36 
  -4 -12   1    0.13    0.45 
  -4 -12   1    0.12    0.45 
   3  12  -1    1.79    0.42 
   3  12  -1    1.32    0.48 
  -3 -12   1    1.03    0.42 
  -3 -12   1    1.16    0.48 
  -3 -12   1    1.48    0.43 
  -3 -12   1    1.33    0.45 
  -3 -12   1    1.53    0.55 
  -3 -12   1    1.55    0.45 
   2  12  -1    0.62    0.34 
   2  12  -1    0.56    0.42 
  -2 -12   1    0.80    0.47 
  -2 -12   1   -0.08    0.37 
  -2 -12   1    0.10    0.44 
  -2 -12   1    0.08    0.38 
  -2 -12   1    1.36    0.42 
  -2 -12   1    0.90    0.38 
   1  12  -1   -0.33    0.29 
   1  12  -1    0.53    0.40 
  -1 -12   1   -0.29    0.35 
  -1 -12   1    0.46    0.37 
  -1 -12   1    0.08    0.40 
  -1 -12   1   -0.19    0.37 
  -1 -12   1   -0.13    0.35 
  -1 -12   1    0.44    0.46 
   0  12  -1   27.94    1.28 
   0  12  -1   29.21    1.21 
   0 -12   1   29.50    1.24 
   0 -12   1   27.25    1.15 
   0 -12   1   30.02    1.22 
   0 -12   1   28.31    1.25 
   0 -12   1   27.59    1.29 
   0 -12   1   27.10    1.25 
  -1  12  -1   46.28    1.68 
  -1  12  -1   49.25    1.62 
   1 -12   1   45.80    1.59 
   1 -12   1   46.78    1.68 
   1 -12   1   43.02    1.65 
   1 -12   1   45.77    1.59 
   1 -12   1   48.56    1.66 
  -2  12  -1   25.87    1.26 
  -2  12  -1   28.53    1.31 
  -2  12  -1   29.66    1.25 
   2 -12   1   30.24    1.27 
   2 -12   1   27.66    1.33 
   2 -12   1   31.30    1.38 
   2 -12   1   29.84    1.29 
   2 -12   1   31.06    1.28 
  -3  12  -1    0.45    0.41 
  -3  12  -1    0.52    0.41 
  -3  12  -1    0.09    0.45 
   3 -12   1   -0.53    0.45 
   3 -12   1   -0.65    0.40 
   3 -12   1   -0.25    0.50 
   3 -12   1    0.04    0.42 
  -4  12  -1    5.71    0.72 
  -4  12  -1    5.94    0.71 
   4 -12   1    5.73    0.81 
   4 -12   1    6.66    0.82 
   4 -12   1    4.55    0.66 
   4 -12   1    7.42    0.82 
  -5  12  -1   34.92    1.51 
  -5  12  -1   35.87    1.49 
   5 -12   1   30.15    1.41 
   5 -12   1   32.27    1.42 
   5 -12   1   32.27    1.58 
   5 -12   1   37.07    1.63 
  -6  12  -1   33.33    1.51 
  -6  12  -1   36.37    1.55 
   6 -12   1   32.45    1.49 
   6 -12   1   35.47    1.51 
   6 -12   1   34.16    1.68 
   6 -12   1   35.40    1.70 
  -7  12  -1   10.58    0.99 
   7 -12   1   14.53    1.05 
   7 -12   1   12.55    1.17 
   7 -12   1    9.68    1.06 
   7 -12   1   10.71    0.99 
  14  11  -1    8.85    1.08 
  14  11  -1    7.52    0.81 
  14  11  -1    8.84    1.11 
  14  11  -1    9.05    0.98 
 -14 -11   1   11.62    1.26 
  13  11  -1   20.96    1.32 
  13  11  -1   18.73    1.09 
  13  11  -1   18.98    1.32 
  13  11  -1   15.94    1.25 
 -13 -11   1   17.83    1.17 
 -13 -11   1   17.22    1.37 
  12  11  -1   68.10    2.09 
  12  11  -1   69.46    2.44 
  12  11  -1   70.07    2.42 
  12  11  -1   69.64    2.32 
 -12 -11   1   73.58    2.24 
 -12 -11   1   65.04    2.54 
 -12 -11   1   70.08    2.21 
  11  11  -1    6.75    0.71 
  11  11  -1    5.33    0.82 
  11  11  -1    5.61    0.74 
  11  11  -1    6.51    0.87 
 -11 -11   1    5.41    0.93 
 -11 -11   1    7.01    0.77 
 -11 -11   1    7.17    0.78 
  10  11  -1    9.35    0.95 
  10  11  -1    9.04    0.92 
  10  11  -1    8.74    0.83 
  10  11  -1   10.00    0.79 
 -10 -11   1    8.83    0.82 
 -10 -11   1   11.14    0.89 
 -10 -11   1    9.06    1.06 
   9  11  -1    3.09    0.62 
   9  11  -1    2.21    0.60 
   9  11  -1    2.00    0.49 
   9  11  -1    2.90    0.51 
  -9 -11   1    3.34    0.59 
  -9 -11   1    2.72    0.72 
  -9 -11   1    2.47    0.52 
   8  11  -1   16.59    0.89 
   8  11  -1   18.97    0.84 
   8  11  -1   18.43    1.00 
   8  11  -1   18.53    1.03 
   8  11  -1   17.29    1.09 
  -8 -11   1   18.80    0.94 
  -8 -11   1   18.90    0.97 
  -8 -11   1   16.45    1.16 
   7  11  -1    4.54    0.52 
   7  11  -1    3.94    0.53 
   7  11  -1    3.88    0.56 
   7  11  -1    4.11    0.65 
   7  11  -1    5.70    0.63 
  -7 -11   1    3.81    0.52 
  -7 -11   1    4.65    0.61 
  -7 -11   1    3.91    0.76 
   6  11  -1    0.01    0.27 
   6  11  -1    0.12    0.42 
   6  11  -1    0.54    0.38 
   6  11  -1    0.21    0.38 
   6  11  -1    0.33    0.30 
  -6 -11   1    0.22    0.33 
  -6 -11   1    0.00    0.40 
  -6 -11   1    0.44    0.48 
   5  11  -1   10.75    0.70 
   5  11  -1   11.02    0.63 
   5  11  -1    9.48    0.68 
   5  11  -1    9.46    0.78 
   5  11  -1   10.03    0.84 
   5  11  -1    8.53    0.64 
  -5 -11   1    8.72    0.64 
  -5 -11   1    9.77    0.75 
  -5 -11   1   10.55    0.77 
  -5 -11   1    8.19    0.86 
   4  11  -1    1.11    0.32 
   4  11  -1    1.47    0.37 
   4  11  -1    1.06    0.43 
   4  11  -1    1.47    0.46 
   4  11  -1    2.07    0.40 
   4  11  -1    1.32    0.37 
  -4 -11   1    1.89    0.38 
  -4 -11   1    1.24    0.50 
  -4 -11   1    1.33    0.51 
  -4 -11   1    1.89    0.46 
  -4 -11   1    1.21    0.39 
  -4 -11   1    1.68    0.41 
   3  11  -1    5.87    0.56 
   3  11  -1    5.98    0.59 
   3  11  -1    6.56    0.53 
   3  11  -1    5.40    0.62 
  -3 -11   1    6.16    0.60 
  -3 -11   1    4.21    0.52 
  -3 -11   1    6.34    0.67 
  -3 -11   1    5.49    0.71 
  -3 -11   1    6.74    0.66 
  -3 -11   1    5.73    0.53 
  -3 -11   1    5.61    0.55 
   2  11  -1    1.24    0.42 
   2  11  -1    1.05    0.32 
   2  11  -1    1.06    0.33 
   2  11  -1    1.16    0.37 
  -2 -11   1    1.02    0.39 
  -2 -11   1    1.83    0.51 
  -2 -11   1    1.44    0.44 
  -2 -11   1    0.91    0.38 
  -2 -11   1    0.82    0.35 
  -2 -11   1    0.92    0.40 
   1  11  -1   10.91    0.63 
   1  11  -1   11.35    0.67 
   1  11  -1   11.02    0.76 
   1  11  -1   11.07    0.76 
  -1 -11   1    9.54    0.75 
  -1 -11   1   11.27    0.78 
  -1 -11   1   11.02    0.77 
  -1 -11   1   10.72    0.66 
  -1 -11   1   11.49    0.76 
  -1 -11   1   10.52    0.82 
   0  11  -1   44.87    1.36 
   0  11  -1   41.95    1.39 
   0  11  -1   40.49    1.49 
   0  11  -1   43.63    1.47 
   0 -11   1   42.08    1.39 
   0 -11   1   41.97    1.48 
   0 -11   1   42.10    1.44 
   0 -11   1   43.05    1.50 
   0 -11   1   43.29    1.46 
   0 -11   1   41.06    1.51 
  -1  11  -1   33.05    1.14 
  -1  11  -1   32.20    1.30 
  -1  11  -1   31.84    1.19 
  -1  11  -1   30.85    1.14 
  -1  11  -1   30.03    1.20 
   1 -11   1   31.08    1.29 
   1 -11   1   28.38    1.26 
   1 -11   1   32.26    1.26 
   1 -11   1   32.12    1.22 
   1 -11   1   32.67    1.25 
   1 -11   1   30.99    1.21 
  -2  11  -1   26.11    1.08 
  -2  11  -1   23.90    1.06 
  -2  11  -1   25.31    1.15 
  -2  11  -1   24.91    1.03 
  -2  11  -1   26.08    1.03 
  -2  11  -1   24.63    1.09 
   2 -11   1   22.36    1.14 
   2 -11   1   23.32    1.10 
   2 -11   1   23.84    1.07 
   2 -11   1   23.13    1.18 
   2 -11   1   24.45    1.10 
  -3  11  -1    1.95    0.44 
  -3  11  -1    0.97    0.37 
  -3  11  -1    1.08    0.39 
  -3  11  -1    1.10    0.44 
  -3  11  -1    1.09    0.41 
   3 -11   1    1.30    0.45 
   3 -11   1    1.19    0.55 
   3 -11   1    1.60    0.57 
   3 -11   1    0.30    0.41 
  -4  11  -1    8.81    0.70 
  -4  11  -1    8.33    0.74 
  -4  11  -1    7.53    0.75 
  -4  11  -1    7.86    0.76 
  -4  11  -1    7.10    0.73 
   4 -11   1    6.73    0.81 
   4 -11   1    6.72    0.67 
   4 -11   1    6.30    0.70 
   4 -11   1    6.51    0.82 
  -5  11  -1   24.26    1.17 
  -5  11  -1   25.64    1.22 
  -5  11  -1   23.00    1.17 
  -5  11  -1   21.48    1.16 
  -5  11  -1   23.37    1.16 
   5 -11   1   22.94    1.15 
   5 -11   1   20.44    1.12 
   5 -11   1   24.00    1.31 
   5 -11   1   24.85    1.36 
  -6  11  -1  101.50    3.02 
  -6  11  -1  109.67    3.01 
  -6  11  -1  108.32    3.03 
  -6  11  -1  106.42    2.93 
  -6  11  -1  105.47    2.91 
   6 -11   1   89.45    2.76 
   6 -11   1  103.93    3.08 
   6 -11   1  104.89    2.87 
  -7  11  -1   28.13    1.37 
  -7  11  -1   27.88    1.39 
  -7  11  -1   26.53    1.35 
  -7  11  -1   25.26    1.28 
   7 -11   1   25.46    1.51 
   7 -11   1   26.45    1.48 
   7 -11   1   26.04    1.29 
   7 -11   1   22.07    1.23 
  -8  11  -1    0.07    0.56 
  -8  11  -1    0.15    0.59 
   8 -11   1   -0.54    0.46 
   8 -11   1    0.09    0.52 
   8 -11   1    0.25    0.63 
   8 -11   1   -0.63    0.70 
  15  10  -1    1.13    0.68 
  15  10  -1    1.15    0.58 
  15  10  -1    0.87    0.63 
  15  10  -1    1.68    0.67 
 -15 -10   1    2.15    0.70 
  14  10  -1   18.17    1.41 
  14  10  -1   22.35    1.18 
  14  10  -1   20.65    1.35 
  14  10  -1   21.44    1.34 
 -14 -10   1   21.32    1.23 
 -14 -10   1   18.79    1.40 
  13  10  -1   77.85    2.48 
  13  10  -1   77.58    2.69 
  13  10  -1   75.64    2.25 
  13  10  -1   74.50    2.59 
 -13 -10   1   75.30    2.71 
 -13 -10   1   76.99    2.38 
 -13 -10   1   78.10    2.39 
  12  10  -1   31.54    1.47 
  12  10  -1   32.35    1.30 
  12  10  -1   30.46    1.52 
  12  10  -1   30.46    1.53 
 -12 -10   1   29.98    1.61 
 -12 -10   1   31.82    1.35 
 -12 -10   1   34.50    1.38 
  11  10  -1    0.29    0.38 
  11  10  -1    0.24    0.49 
  11  10  -1   -0.19    0.49 
  11  10  -1   -0.13    0.38 
 -11 -10   1   -0.01    0.43 
 -11 -10   1    0.37    0.57 
 -11 -10   1    0.07    0.45 
  10  10  -1   -0.11    0.36 
  10  10  -1    0.65    0.38 
  10  10  -1    0.21    0.45 
  10  10  -1    0.17    0.51 
 -10 -10   1   -0.39    0.35 
 -10 -10   1    0.40    0.43 
 -10 -10   1   -0.11    0.52 
   9  10  -1    7.07    0.81 
   9  10  -1    8.76    0.70 
   9  10  -1    6.81    0.69 
   9  10  -1    9.53    0.87 
   9  10  -1    8.42    0.70 
  -9 -10   1    8.85    0.74 
  -9 -10   1    7.03    0.90 
  -9 -10   1    9.81    0.79 
  -9 -10   1    7.70    0.69 
   8  10  -1   14.79    0.89 
   8  10  -1   14.63    0.95 
   8  10  -1   13.87    0.79 
   8  10  -1   15.54    0.72 
   8  10  -1   14.07    0.88 
   8  10  -1   14.12    0.80 
  -8 -10   1   14.42    0.72 
  -8 -10   1   13.84    1.06 
  -8 -10   1   13.36    0.80 
  -8 -10   1   13.44    0.80 
  -8 -10   1   13.01    0.84 
   7  10  -1    7.35    0.71 
   7  10  -1    7.53    0.62 
   7  10  -1    5.85    0.68 
   7  10  -1    6.81    0.57 
   7  10  -1    6.01    0.64 
   7  10  -1    7.04    0.60 
  -7 -10   1    7.28    0.88 
  -7 -10   1    6.54    0.52 
  -7 -10   1    7.47    0.68 
  -7 -10   1    6.28    0.57 
  -7 -10   1    6.52    0.62 
   6  10  -1    6.29    0.69 
   6  10  -1    6.54    0.59 
   6  10  -1    6.96    0.60 
   6  10  -1    6.56    0.55 
   6  10  -1    7.01    0.66 
   6  10  -1    7.57    0.66 
  -6 -10   1    7.01    0.66 
  -6 -10   1    6.93    0.65 
  -6 -10   1    6.62    0.54 
  -6 -10   1    7.09    0.66 
  -6 -10   1    6.82    0.80 
   5  10  -1    6.97    0.69 
   5  10  -1    6.38    0.53 
   5  10  -1    8.10    0.62 
   5  10  -1    7.53    0.63 
   5  10  -1    8.19    0.71 
   5  10  -1    7.80    0.55 
  -5 -10   1    8.23    0.72 
  -5 -10   1    5.95    0.72 
  -5 -10   1    7.01    0.62 
  -5 -10   1    8.28    0.59 
  -5 -10   1    7.70    0.64 
  -5 -10   1    7.45    0.69 
  -5 -10   1    6.95    0.53 
   4  10  -1    5.67    0.53 
   4  10  -1    5.23    0.58 
   4  10  -1    4.76    0.51 
   4  10  -1    5.07    0.61 
   4  10  -1    6.36    0.57 
   4  10  -1    5.36    0.48 
   4  10  -1    4.89    0.45 
  -4 -10   1    5.03    0.57 
  -4 -10   1    4.54    0.50 
  -4 -10   1    4.87    0.58 
  -4 -10   1    4.96    0.55 
  -4 -10   1    4.37    0.55 
  -4 -10   1    4.06    0.61 
  -4 -10   1    5.19    0.49 
   3  10  -1    8.64    0.58 
   3  10  -1    8.77    0.62 
   3  10  -1    9.57    0.65 
   3  10  -1    8.59    0.49 
   3  10  -1    9.14    0.56 
   3  10  -1    8.58    0.51 
   3  10  -1    7.81    0.67 
  -3 -10   1    9.48    0.69 
  -3 -10   1    8.32    0.70 
  -3 -10   1    9.36    0.60 
  -3 -10   1    8.21    0.79 
  -3 -10   1   10.64    0.68 
  -3 -10   1    8.75    0.65 
  -3 -10   1    8.52    0.60 
   2  10  -1   19.51    0.87 
   2  10  -1   18.56    0.89 
   2  10  -1   17.60    0.87 
   2  10  -1   19.32    0.81 
   2  10  -1   19.54    0.75 
   2  10  -1   18.60    0.72 
   2  10  -1   19.80    0.83 
  -2 -10   1   19.15    0.87 
  -2 -10   1   21.34    0.92 
  -2 -10   1   18.46    0.89 
  -2 -10   1   19.67    0.89 
  -2 -10   1   19.56    0.82 
  -2 -10   1   19.28    1.02 
   1  10  -1   87.19    2.34 
   1  10  -1   88.39    2.29 
   1  10  -1   89.55    2.33 
   1  10  -1   90.22    2.21 
   1  10  -1   85.48    2.36 
  -1 -10   1   89.58    2.30 
  -1 -10   1   87.81    2.37 
  -1 -10   1   89.54    2.32 
  -1 -10   1   91.29    2.55 
  -1 -10   1   92.51    2.38 
  -1 -10   1   93.06    2.35 
   0  10  -1   77.01    2.18 
   0  10  -1   81.55    2.14 
   0  10  -1   79.88    2.19 
   0  10  -1   82.24    2.07 
   0 -10   1   78.81    2.28 
   0 -10   1   79.21    2.20 
   0 -10   1   76.52    2.19 
   0 -10   1   78.91    2.12 
   0 -10   1   82.34    2.17 
   0 -10   1   80.35    2.14 
  -1  10  -1   26.67    1.08 
  -1  10  -1   28.16    1.05 
  -1  10  -1   26.38    1.00 
  -1  10  -1   28.17    1.13 
  -1  10  -1   27.32    0.99 
   1 -10   1   28.90    1.12 
   1 -10   1   26.38    1.05 
   1 -10   1   26.94    1.09 
   1 -10   1   25.71    1.06 
   1 -10   1   24.94    1.12 
   1 -10   1   26.83    1.14 
  -2  10  -1   -0.09    0.30 
  -2  10  -1   -0.12    0.29 
  -2  10  -1    0.17    0.30 
  -2  10  -1   -0.01    0.29 
  -2  10  -1   -0.06    0.32 
   2 -10   1   -0.28    0.39 
   2 -10   1    0.02    0.33 
   2 -10   1    0.17    0.42 
   2 -10   1   -0.24    0.31 
   2 -10   1    0.55    0.40 
  -3  10  -1   15.61    0.82 
  -3  10  -1   16.09    0.85 
  -3  10  -1   15.58    0.88 
  -3  10  -1   15.31    0.89 
  -3  10  -1   16.16    0.83 
  -3  10  -1   16.47    0.82 
   3 -10   1   16.96    1.00 
   3 -10   1   12.80    0.92 
   3 -10   1   15.59    0.94 
   3 -10   1   15.53    0.86 
   3 -10   1   13.53    0.86 
  -4  10  -1   20.45    1.00 
  -4  10  -1   21.10    1.06 
  -4  10  -1   21.13    1.00 
  -4  10  -1   21.96    1.04 
  -4  10  -1   21.18    1.00 
   4 -10   1   19.30    1.13 
   4 -10   1   20.64    0.98 
   4 -10   1   18.97    1.00 
   4 -10   1   19.62    1.08 
  -5  10  -1   35.17    1.36 
  -5  10  -1   33.49    1.33 
  -5  10  -1   35.59    1.37 
  -5  10  -1   33.05    1.35 
  -5  10  -1   34.08    1.39 
   5 -10   1   33.56    1.47 
   5 -10   1   28.27    1.26 
   5 -10   1   35.77    1.34 
   5 -10   1   34.29    1.45 
  -6  10  -1   34.78    1.41 
  -6  10  -1   31.58    1.39 
  -6  10  -1   31.85    1.35 
  -6  10  -1   32.20    1.36 
  -6  10  -1   32.62    1.39 
   6 -10   1   31.98    1.32 
   6 -10   1   31.92    1.51 
   6 -10   1   31.08    1.50 
   6 -10   1   31.07    1.32 
  -7  10  -1    1.11    0.45 
  -7  10  -1    1.00    0.54 
  -7  10  -1    0.89    0.52 
  -7  10  -1    2.08    0.61 
  -7  10  -1    1.32    0.54 
   7 -10   1    1.81    0.65 
   7 -10   1    1.09    0.49 
   7 -10   1    1.03    0.67 
   7 -10   1    1.68    0.56 
  -8  10  -1    0.33    0.53 
  -8  10  -1    0.46    0.54 
  -8  10  -1   -0.60    0.56 
  -8  10  -1    0.31    0.52 
   8 -10   1    0.32    0.49 
   8 -10   1    0.64    0.72 
   8 -10   1    0.64    0.48 
   8 -10   1    0.99    0.61 
  -9  10  -1    1.22    0.65 
  -9  10  -1    0.78    0.60 
   9 -10   1    1.48    0.79 
   9 -10   1    2.40    0.77 
   9 -10   1    1.36    0.54 
   9 -10   1    1.64    0.57 
  15   9  -1   14.05    1.39 
  15   9  -1   12.89    0.99 
  15   9  -1   14.79    1.19 
  15   9  -1   14.19    1.25 
 -15  -9   1   13.47    1.11 
  14   9  -1   43.92    1.81 
  14   9  -1   42.59    1.59 
  14   9  -1   45.77    1.90 
  14   9  -1   43.68    1.98 
 -14  -9   1   44.42    1.74 
 -14  -9   1   43.14    1.72 
 -14  -9   1   42.72    1.92 
  13   9  -1   52.31    1.70 
  13   9  -1   49.93    2.07 
  13   9  -1   47.88    1.96 
  13   9  -1   49.52    1.88 
 -13  -9   1   53.29    1.83 
 -13  -9   1   52.36    1.79 
 -13  -9   1   48.28    1.79 
 -13  -9   1   48.94    2.05 
  12   9  -1    4.72    0.69 
  12   9  -1    5.61    0.86 
  12   9  -1    5.30    0.62 
  12   9  -1    5.40    0.80 
 -12  -9   1    5.30    0.64 
 -12  -9   1    5.21    0.68 
 -12  -9   1    4.66    0.68 
 -12  -9   1    3.79    0.74 
  11   9  -1    1.27    0.55 
  11   9  -1    1.10    0.42 
  11   9  -1    0.56    0.51 
  11   9  -1    1.02    0.45 
 -11  -9   1    0.79    0.43 
 -11  -9   1    1.31    0.49 
 -11  -9   1    1.56    0.49 
 -11  -9   1    0.84    0.46 
 -11  -9   1    1.30    0.56 
  10   9  -1    1.28    0.42 
  10   9  -1    1.15    0.42 
  10   9  -1    1.28    0.54 
  10   9  -1    0.97    0.50 
 -10  -9   1    0.87    0.43 
 -10  -9   1    1.10    0.52 
 -10  -9   1    0.70    0.44 
 -10  -9   1    1.55    0.42 
 -10  -9   1    1.50    0.40 
   9   9  -1    7.05    0.61 
   9   9  -1    5.93    0.63 
   9   9  -1    5.01    0.69 
   9   9  -1    6.56    0.77 
  -9  -9   1    6.59    0.68 
  -9  -9   1    7.25    0.87 
  -9  -9   1    6.75    0.65 
  -9  -9   1    7.79    0.70 
   8   9  -1   89.63    2.52 
   8   9  -1   85.48    2.50 
   8   9  -1   89.43    2.15 
   8   9  -1   83.40    2.40 
   8   9  -1   88.71    2.28 
   8   9  -1   86.62    2.25 
  -8  -9   1   89.58    2.34 
  -8  -9   1   88.94    2.35 
  -8  -9   1   89.63    2.37 
  -8  -9   1   85.19    2.67 
   7   9  -1   10.96    0.66 
   7   9  -1   11.80    0.79 
   7   9  -1   11.82    0.76 
   7   9  -1   11.64    0.68 
   7   9  -1   10.60    0.62 
   7   9  -1   12.20    0.83 
  -7  -9   1   11.20    0.90 
  -7  -9   1   11.92    0.74 
  -7  -9   1   11.57    0.68 
  -7  -9   1   11.94    0.71 
  -7  -9   1   12.43    0.63 
  -7  -9   1   11.13    0.72 
   6   9  -1    4.61    0.52 
   6   9  -1    5.05    0.56 
   6   9  -1    4.84    0.47 
   6   9  -1    3.29    0.41 
   6   9  -1    3.75    0.53 
   6   9  -1    3.44    0.43 
  -6  -9   1    3.88    0.62 
  -6  -9   1    4.94    0.53 
  -6  -9   1    3.68    0.48 
  -6  -9   1    2.89    0.47 
  -6  -9   1    3.35    0.42 
  -6  -9   1    4.15    0.54 
   5   9  -1    5.24    0.49 
   5   9  -1    5.94    0.57 
   5   9  -1    7.26    0.59 
   5   9  -1    5.50    0.50 
   5   9  -1    5.10    0.58 
   5   9  -1    5.52    0.49 
   5   9  -1    5.71    0.47 
  -5  -9   1    5.11    0.66 
  -5  -9   1    5.45    0.53 
  -5  -9   1    5.16    0.56 
  -5  -9   1    5.12    0.50 
  -5  -9   1    4.42    0.46 
  -5  -9   1    5.61    0.57 
  -5  -9   1    5.79    0.44 
   4   9  -1    2.65    0.36 
   4   9  -1    3.23    0.47 
   4   9  -1    3.20    0.42 
   4   9  -1    3.24    0.46 
   4   9  -1    2.76    0.38 
   4   9  -1    2.44    0.36 
   4   9  -1    2.25    0.34 
  -4  -9   1    2.39    0.40 
  -4  -9   1    2.07    0.34 
  -4  -9   1    2.17    0.47 
  -4  -9   1    2.76    0.46 
  -4  -9   1    2.14    0.42 
  -4  -9   1    2.36    0.35 
  -4  -9   1    1.86    0.34 
   3   9  -1    3.82    0.39 
   3   9  -1    4.64    0.50 
   3   9  -1    3.90    0.43 
   3   9  -1    3.39    0.47 
   3   9  -1    3.96    0.45 
   3   9  -1    4.08    0.39 
   3   9  -1    4.45    0.45 
  -3  -9   1    4.41    0.54 
  -3  -9   1    3.59    0.54 
  -3  -9   1    3.83    0.46 
  -3  -9   1    3.91    0.47 
  -3  -9   1    3.58    0.41 
  -3  -9   1    4.52    0.45 
  -3  -9   1    3.88    0.42 
   2   9  -1   75.51    2.09 
   2   9  -1   78.73    2.05 
   2   9  -1   79.31    2.03 
   2   9  -1   74.93    1.88 
   2   9  -1   75.99    1.92 
   2   9  -1   77.67    1.98 
   2   9  -1   77.02    2.02 
  -2  -9   1   76.52    2.06 
  -2  -9   1   75.89    2.23 
  -2  -9   1   75.53    2.01 
  -2  -9   1   78.92    2.02 
  -2  -9   1   78.82    2.04 
  -2  -9   1   79.88    2.17 
  -2  -9   1   80.09    2.03 
  -2  -9   1   78.47    2.02 
   1   9  -1   70.46    1.87 
   1   9  -1   71.54    1.80 
   1   9  -1   70.89    1.75 
   1   9  -1   71.47    1.93 
   1   9  -1   72.81    1.89 
   1   9  -1   70.96    1.85 
   1   9  -1   70.41    1.93 
  -1  -9   1   71.49    2.07 
  -1  -9   1   69.10    1.86 
  -1  -9   1   66.00    1.91 
  -1  -9   1   70.36    1.88 
  -1  -9   1   71.04    1.91 
  -1  -9   1   71.30    1.90 
   0   9  -1  100.97    2.44 
   0   9  -1   97.38    2.46 
   0   9  -1  102.28    2.54 
   0   9  -1   94.37    2.46 
   0   9  -1  103.66    2.55 
   0   9  -1  103.11    2.57 
   0  -9   1  100.20    2.58 
   0  -9   1  103.90    2.54 
   0  -9   1   98.75    2.52 
   0  -9   1  102.32    2.51 
   0  -9   1   99.66    2.57 
   0  -9   1  106.38    2.71 
  -1   9  -1    0.76    0.28 
  -1   9  -1    0.74    0.31 
  -1   9  -1    0.92    0.33 
  -1   9  -1    0.98    0.30 
  -1   9  -1    0.89    0.33 
   1  -9   1    0.34    0.29 
   1  -9   1    0.03    0.36 
   1  -9   1    1.02    0.35 
   1  -9   1    1.07    0.32 
   1  -9   1    0.46    0.34 
   1  -9   1    0.54    0.37 
  -2   9  -1    4.29    0.49 
  -2   9  -1    5.16    0.52 
  -2   9  -1    5.17    0.53 
  -2   9  -1    5.93    0.59 
  -2   9  -1    4.19    0.50 
   2  -9   1    3.70    0.46 
   2  -9   1    4.76    0.57 
   2  -9   1    4.54    0.47 
   2  -9   1    3.77    0.47 
   2  -9   1    5.10    0.60 
   2  -9   1    5.27    0.58 
  -3   9  -1   29.86    1.17 
  -3   9  -1   29.69    1.12 
  -3   9  -1   34.15    1.24 
  -3   9  -1   29.98    1.13 
  -3   9  -1   30.62    1.13 
  -3   9  -1   31.95    1.14 
   3  -9   1   29.59    1.15 
   3  -9   1   32.08    1.22 
   3  -9   1   28.99    1.20 
   3  -9   1   32.85    1.28 
   3  -9   1   31.26    1.14 
  -4   9  -1   67.46    1.95 
  -4   9  -1   67.25    1.90 
  -4   9  -1   67.42    1.95 
  -4   9  -1   66.07    1.99 
  -4   9  -1   67.04    1.95 
   4  -9   1   66.85    2.07 
   4  -9   1   65.56    2.00 
   4  -9   1   64.80    1.89 
   4  -9   1   59.04    1.85 
  -5   9  -1   44.78    1.49 
  -5   9  -1   44.98    1.53 
  -5   9  -1   44.84    1.55 
  -5   9  -1   43.44    1.56 
  -5   9  -1   47.76    1.58 
   5  -9   1   42.63    1.47 
   5  -9   1   46.37    1.69 
   5  -9   1   42.18    1.48 
   5  -9   1   43.65    1.61 
  -6   9  -1    2.53    0.52 
  -6   9  -1    1.28    0.48 
  -6   9  -1    2.97    0.53 
  -6   9  -1    2.67    0.50 
  -6   9  -1    2.97    0.57 
   6  -9   1    1.05    0.55 
   6  -9   1    2.30    0.46 
   6  -9   1    1.71    0.48 
   6  -9   1    2.59    0.63 
  -7   9  -1    0.97    0.49 
  -7   9  -1    2.04    0.53 
  -7   9  -1    0.91    0.39 
  -7   9  -1    1.55    0.52 
  -7   9  -1    1.56    0.54 
   7  -9   1    2.23    0.53 
   7  -9   1    0.94    0.57 
   7  -9   1    0.75    0.61 
   7  -9   1    1.80    0.52 
  -8   9  -1    0.19    0.45 
  -8   9  -1    0.35    0.50 
  -8   9  -1    1.39    0.54 
  -8   9  -1    1.14    0.54 
   8  -9   1    0.25    0.41 
   8  -9   1    0.36    0.42 
   8  -9   1    0.34    0.65 
   8  -9   1   -0.08    0.57 
  -9   9  -1    0.76    0.53 
  -9   9  -1    0.40    0.58 
  -9   9  -1    0.10    0.50 
  -9   9  -1    0.23    0.57 
   9  -9   1    0.34    0.51 
   9  -9   1    0.61    0.46 
   9  -9   1    0.33    0.59 
   9  -9   1    0.94    0.76 
   9  -9   1    0.77    0.50 
 -10   9  -1    1.90    0.72 
 -10   9  -1    0.72    0.56 
 -10   9  -1    1.55    0.63 
  10  -9   1    0.50    0.76 
  10  -9   1    1.20    0.55 
  10  -9   1    1.18    0.51 
  10  -9   1    0.78    0.50 
  10  -9   1    0.80    0.66 
  15   8  -1   43.08    1.78 
  15   8  -1   39.71    1.55 
  15   8  -1   36.01    1.87 
  15   8  -1   41.09    1.84 
 -15  -8   1   40.05    1.73 
  14   8  -1   18.45    1.21 
  14   8  -1   17.99    1.21 
  14   8  -1   16.00    1.30 
  14   8  -1   17.57    1.04 
 -14  -8   1   18.17    1.16 
 -14  -8   1   17.42    1.14 
  13   8  -1    6.69    0.87 
  13   8  -1    6.07    0.67 
  13   8  -1    4.67    0.86 
  13   8  -1    5.67    0.73 
 -13  -8   1    6.27    0.74 
 -13  -8   1    6.07    0.87 
 -13  -8   1    5.11    0.80 
 -13  -8   1    5.28    0.72 
 -13  -8   1    6.43    0.82 
  12   8  -1    7.99    0.70 
  12   8  -1    8.50    0.80 
  12   8  -1    6.94    0.92 
  12   8  -1    8.34    0.91 
 -12  -8   1    8.12    0.96 
 -12  -8   1    7.96    0.80 
 -12  -8   1    8.10    0.77 
 -12  -8   1    7.52    0.77 
 -12  -8   1    6.98    0.72 
  11   8  -1    2.60    0.48 
  11   8  -1    1.85    0.50 
  11   8  -1    2.71    0.64 
  11   8  -1    1.23    0.56 
 -11  -8   1    2.40    0.49 
 -11  -8   1    2.44    0.49 
 -11  -8   1    2.01    0.48 
 -11  -8   1    0.70    0.51 
 -11  -8   1    1.75    0.50 
  10   8  -1    2.59    0.59 
  10   8  -1    2.31    0.57 
  10   8  -1    2.92    0.51 
  10   8  -1    3.82    0.49 
 -10  -8   1    2.97    0.64 
 -10  -8   1    3.30    0.49 
 -10  -8   1    2.25    0.44 
 -10  -8   1    3.55    0.53 
 -10  -8   1    2.97    0.53 
   9   8  -1    2.15    0.40 
   9   8  -1    1.83    0.51 
   9   8  -1    1.48    0.49 
   9   8  -1    1.72    0.43 
  -9  -8   1    1.95    0.57 
  -9  -8   1    2.71    0.48 
  -9  -8   1    2.13    0.48 
  -9  -8   1    2.63    0.42 
  -9  -8   1    2.44    0.48 
   8   8  -1    5.36    0.51 
   8   8  -1    5.08    0.64 
   8   8  -1    6.01    0.57 
   8   8  -1    4.94    0.56 
   8   8  -1    4.41    0.59 
   8   8  -1    5.70    0.41 
  -8  -8   1    4.69    0.54 
  -8  -8   1    5.33    0.56 
  -8  -8   1    5.60    0.77 
  -8  -8   1    6.30    0.60 
   7   8  -1   91.46    2.14 
   7   8  -1   88.21    2.36 
   7   8  -1   90.12    2.22 
   7   8  -1   84.92    2.43 
   7   8  -1   87.45    2.23 
   7   8  -1   89.55    2.46 
  -7  -8   1   87.83    2.60 
  -7  -8   1   89.17    2.25 
  -7  -8   1   90.84    2.30 
  -7  -8   1   90.40    2.33 
  -7  -8   1   88.83    2.37 
  -7  -8   1   92.54    2.32 
   6   8  -1    0.21    0.25 
   6   8  -1    0.49    0.26 
   6   8  -1    0.11    0.28 
   6   8  -1    0.10    0.16 
   6   8  -1    0.17    0.32 
   6   8  -1    0.40    0.22 
   6   8  -1    0.36    0.25 
   6   8  -1    0.48    0.29 
  -6  -8   1    0.45    0.29 
  -6  -8   1    0.38    0.34 
  -6  -8   1    0.14    0.30 
  -6  -8   1    0.31    0.28 
  -6  -8   1    0.20    0.20 
  -6  -8   1    0.43    0.30 
  -6  -8   1   -0.13    0.23 
  -6  -8   1    0.55    0.20 
   5   8  -1    2.98    0.35 
   5   8  -1    2.92    0.35 
   5   8  -1    2.64    0.42 
   5   8  -1    2.78    0.42 
   5   8  -1    2.50    0.37 
   5   8  -1    2.62    0.34 
   5   8  -1    2.93    0.35 
  -5  -8   1    2.10    0.46 
  -5  -8   1    2.26    0.37 
  -5  -8   1    2.69    0.41 
  -5  -8   1    2.24    0.34 
  -5  -8   1    2.31    0.34 
  -5  -8   1    2.29    0.39 
  -5  -8   1    2.67    0.31 
   4   8  -1    7.63    0.48 
   4   8  -1    8.54    0.55 
   4   8  -1    7.03    0.45 
   4   8  -1    7.87    0.50 
   4   8  -1    8.50    0.48 
   4   8  -1    7.02    0.48 
   4   8  -1    7.62    0.57 
  -4  -8   1    8.06    0.55 
  -4  -8   1    7.94    0.51 
  -4  -8   1    7.41    0.55 
  -4  -8   1    8.11    0.65 
  -4  -8   1    6.82    0.50 
  -4  -8   1    7.88    0.49 
  -4  -8   1    7.70    0.46 
   3   8  -1   94.62    2.26 
   3   8  -1   94.60    2.31 
   3   8  -1   91.27    2.27 
   3   8  -1   90.81    2.36 
   3   8  -1   91.28    2.15 
   3   8  -1   93.28    2.30 
   3   8  -1   93.42    2.23 
  -3  -8   1   91.63    2.31 
  -3  -8   1   93.45    2.55 
  -3  -8   1   92.69    2.24 
  -3  -8   1   93.44    2.32 
  -3  -8   1   94.05    2.31 
  -3  -8   1   93.75    2.38 
  -3  -8   1   93.00    2.28 
   2   8  -1  110.03    2.63 
   2   8  -1  116.51    2.71 
   2   8  -1  112.79    2.67 
   2   8  -1  110.57    2.60 
   2   8  -1  112.55    2.65 
   2   8  -1  107.47    2.53 
   2   8  -1  109.58    2.74 
  -2  -8   1  112.29    2.67 
  -2  -8   1  114.13    2.93 
  -2  -8   1  111.49    2.82 
  -2  -8   1  114.49    2.68 
  -2  -8   1  109.89    2.71 
  -2  -8   1  113.19    2.66 
  -2  -8   1  114.90    2.72 
  -2  -8   1  112.98    2.66 
   1   8  -1   95.22    2.29 
   1   8  -1   91.62    2.34 
   1   8  -1   92.58    2.21 
   1   8  -1   93.11    2.22 
   1   8  -1   90.58    2.23 
   1   8  -1   95.25    2.32 
   1   8  -1   89.66    2.29 
  -1  -8   1   96.20    2.33 
  -1  -8   1   93.43    2.28 
  -1  -8   1   92.49    2.35 
  -1  -8   1   94.23    2.49 
  -1  -8   1   91.72    2.31 
  -1  -8   1   94.35    2.29 
  -1  -8   1  100.90    2.45 
   0   8  -1   29.46    0.97 
   0   8  -1   29.42    0.82 
   0   8  -1   27.22    1.00 
   0   8  -1   28.93    0.94 
   0   8  -1   29.61    0.97 
   0   8  -1   29.93    1.05 
   0   8  -1   27.22    0.95 
   0  -8   1   28.96    1.05 
   0  -8   1   29.94    1.04 
   0  -8   1   28.61    1.03 
   0  -8   1   30.30    1.01 
   0  -8   1   30.84    1.06 
   0  -8   1   30.07    1.03 
   0  -8   1   30.94    0.99 
  -1   8  -1   10.53    0.56 
  -1   8  -1   10.09    0.57 
  -1   8  -1   11.10    0.64 
  -1   8  -1   10.80    0.56 
  -1   8  -1    9.72    0.57 
  -1   8  -1    9.46    0.61 
   1  -8   1    9.71    0.65 
   1  -8   1   10.48    0.61 
   1  -8   1   10.03    0.61 
   1  -8   1   10.82    0.62 
   1  -8   1    9.77    0.57 
   1  -8   1   11.70    0.69 
  -2   8  -1    2.96    0.39 
  -2   8  -1    1.94    0.37 
  -2   8  -1    2.12    0.38 
  -2   8  -1    2.59    0.38 
  -2   8  -1    2.75    0.41 
   2  -8   1    1.99    0.34 
   2  -8   1    2.01    0.36 
   2  -8   1    1.52    0.32 
   2  -8   1    2.99    0.49 
   2  -8   1    1.99    0.40 
   2  -8   1    2.42    0.43 
  -3   8  -1   35.31    1.18 
  -3   8  -1   36.58    1.19 
  -3   8  -1   35.37    1.26 
  -3   8  -1   37.82    1.25 
  -3   8  -1   36.32    1.21 
  -3   8  -1   36.54    1.20 
   3  -8   1   35.36    1.21 
   3  -8   1   34.43    1.18 
   3  -8   1   36.46    1.31 
   3  -8   1   34.55    1.24 
   3  -8   1   33.05    1.24 
  -4   8  -1  103.78    2.55 
  -4   8  -1  100.10    2.52 
  -4   8  -1   98.73    2.59 
  -4   8  -1   99.38    2.62 
  -4   8  -1   98.91    2.64 
   4  -8   1  100.51    2.70 
   4  -8   1   96.87    2.50 
   4  -8   1   99.77    2.51 
   4  -8   1   97.57    2.62 
  -5   8  -1   51.52    1.64 
  -5   8  -1   48.72    1.59 
  -5   8  -1   51.31    1.57 
  -5   8  -1   48.18    1.54 
  -5   8  -1   48.74    1.64 
   5  -8   1   51.15    1.71 
   5  -8   1   48.04    1.65 
   5  -8   1   48.54    1.52 
   5  -8   1   48.37    1.53 
  -6   8  -1    6.14    0.69 
  -6   8  -1    5.07    0.64 
  -6   8  -1    6.19    0.63 
  -6   8  -1    7.27    0.69 
  -6   8  -1    5.58    0.63 
   6  -8   1    5.05    0.57 
   6  -8   1    4.45    0.67 
   6  -8   1    6.15    0.62 
   6  -8   1    5.41    0.61 
   6  -8   1    5.81    0.73 
  -7   8  -1    0.72    0.41 
  -7   8  -1    1.14    0.37 
  -7   8  -1    0.70    0.45 
  -7   8  -1    0.89    0.43 
  -7   8  -1    0.61    0.43 
   7  -8   1    0.95    0.57 
   7  -8   1    0.78    0.38 
   7  -8   1    0.57    0.42 
   7  -8   1    0.88    0.52 
   7  -8   1    0.90    0.39 
  -8   8  -1    0.20    0.41 
  -8   8  -1    0.09    0.43 
  -8   8  -1    0.04    0.41 
  -8   8  -1   -0.19    0.45 
   8  -8   1    0.12    0.40 
   8  -8   1    0.72    0.43 
   8  -8   1    0.38    0.41 
   8  -8   1    0.84    0.56 
   8  -8   1    0.48    0.60 
  -9   8  -1   11.79    1.00 
  -9   8  -1   13.73    1.01 
  -9   8  -1   14.39    1.05 
  -9   8  -1   13.10    1.02 
   9  -8   1   12.76    1.16 
   9  -8   1    9.99    0.87 
   9  -8   1   13.20    0.95 
   9  -8   1   12.19    1.09 
   9  -8   1   12.74    0.92 
 -10   8  -1   10.64    1.01 
 -10   8  -1    9.37    1.02 
 -10   8  -1   11.60    1.08 
 -10   8  -1    9.51    0.99 
  10  -8   1    9.06    1.02 
  10  -8   1   10.52    0.93 
  10  -8   1   11.00    1.17 
  10  -8   1   11.65    1.01 
  10  -8   1   11.24    0.96 
 -11   8  -1    5.04    0.89 
 -11   8  -1    3.61    0.78 
 -11   8  -1    2.87    0.76 
 -11   8  -1    1.97    0.75 
  11  -8   1    4.15    0.73 
  11  -8   1    3.69    0.84 
  11  -8   1    3.16    0.67 
  11  -8   1    3.16    0.89 
  11  -8   1    4.28    0.72 
  15   7  -1   27.37    1.64 
  15   7  -1   29.76    1.32 
  15   7  -1   29.51    1.48 
  15   7  -1   29.18    1.59 
 -15  -7   1   29.36    1.49 
  14   7  -1    3.73    0.80 
  14   7  -1    2.95    0.58 
  14   7  -1    3.16    0.64 
  14   7  -1    2.68    0.66 
 -14  -7   1    2.99    0.69 
 -14  -7   1    3.90    0.73 
 -14  -7   1    2.77    0.65 
  13   7  -1    0.20    0.54 
  13   7  -1    1.20    0.45 
  13   7  -1    0.88    0.49 
  13   7  -1    0.71    0.55 
 -13  -7   1   -0.08    0.46 
 -13  -7   1   -0.13    0.48 
 -13  -7   1    0.20    0.47 
 -13  -7   1    0.11    0.45 
 -13  -7   1    0.62    0.51 
  12   7  -1    1.31    0.56 
  12   7  -1    0.95    0.46 
  12   7  -1    1.64    0.44 
  12   7  -1    0.96    0.55 
 -12  -7   1    1.25    0.44 
 -12  -7   1    1.49    0.52 
 -12  -7   1    1.74    0.57 
 -12  -7   1    0.38    0.40 
 -12  -7   1    1.32    0.44 
  11   7  -1   -0.22    0.43 
  11   7  -1    0.59    0.38 
  11   7  -1    0.44    0.36 
  11   7  -1    0.61    0.50 
 -11  -7   1    0.26    0.42 
 -11  -7   1    0.15    0.42 
 -11  -7   1    0.30    0.36 
 -11  -7   1    0.80    0.43 
 -11  -7   1    0.62    0.40 
  10   7  -1    0.10    0.32 
  10   7  -1   -0.02    0.41 
  10   7  -1   -0.22    0.41 
  10   7  -1    0.09    0.34 
 -10  -7   1    0.40    0.39 
 -10  -7   1    0.08    0.35 
 -10  -7   1   -0.24    0.39 
 -10  -7   1   -0.47    0.34 
 -10  -7   1    0.12    0.36 
   9   7  -1   14.56    0.90 
   9   7  -1   16.51    0.89 
   9   7  -1   16.68    0.78 
   9   7  -1   14.51    0.90 
  -9  -7   1   16.18    0.81 
  -9  -7   1   16.87    0.80 
  -9  -7   1   15.47    0.83 
  -9  -7   1   16.81    0.84 
  -9  -7   1   15.13    0.94 
   8   7  -1   42.55    1.13 
   8   7  -1   40.51    1.44 
   8   7  -1   42.56    1.40 
   8   7  -1   42.22    1.48 
   8   7  -1   41.79    1.26 
  -8  -7   1   41.63    1.28 
  -8  -7   1   40.19    1.37 
  -8  -7   1   43.63    1.36 
  -8  -7   1   42.87    1.34 
  -8  -7   1   42.76    1.35 
  -8  -7   1   43.02    1.57 
   7   7  -1   67.49    1.87 
   7   7  -1   68.01    1.97 
   7   7  -1   67.59    1.64 
   7   7  -1   68.17    1.96 
   7   7  -1   67.31    1.78 
   7   7  -1   66.23    1.57 
   7   7  -1   66.99    1.73 
  -7  -7   1   66.05    1.77 
  -7  -7   1   68.35    1.82 
  -7  -7   1   68.18    2.09 
  -7  -7   1   65.41    1.86 
  -7  -7   1   69.67    1.85 
  -7  -7   1   68.27    1.82 
   6   7  -1   25.02    0.89 
   6   7  -1   23.56    0.98 
   6   7  -1   25.67    0.82 
   6   7  -1   24.80    0.85 
   6   7  -1   24.95    0.94 
   6   7  -1   24.04    0.69 
   6   7  -1   24.47    0.96 
   6   7  -1   24.34    0.86 
  -6  -7   1   26.18    0.91 
  -6  -7   1   25.34    0.89 
  -6  -7   1   24.91    1.09 
  -6  -7   1   24.23    0.94 
  -6  -7   1   24.85    0.88 
  -6  -7   1   25.20    0.87 
   5   7  -1    3.77    0.26 
   5   7  -1    4.62    0.39 
   5   7  -1    4.04    0.37 
   5   7  -1    3.65    0.37 
   5   7  -1    4.44    0.43 
   5   7  -1    3.81    0.46 
   5   7  -1    3.88    0.37 
   5   7  -1    4.83    0.46 
  -5  -7   1    3.72    0.31 
  -5  -7   1    4.35    0.41 
  -5  -7   1    4.07    0.41 
  -5  -7   1    4.79    0.56 
  -5  -7   1    3.52    0.38 
  -5  -7   1    3.63    0.38 
  -5  -7   1    3.91    0.42 
   4   7  -1   17.69    0.64 
   4   7  -1   19.23    0.73 
   4   7  -1   18.97    0.70 
   4   7  -1   19.42    0.72 
   4   7  -1   18.60    0.69 
   4   7  -1   19.24    0.79 
   4   7  -1   18.32    0.75 
  -4  -7   1   19.35    0.71 
  -4  -7   1   18.88    0.72 
  -4  -7   1   20.01    0.78 
  -4  -7   1   17.47    0.65 
  -4  -7   1   17.79    0.71 
  -4  -7   1   18.32    0.73 
  -4  -7   1   17.79    0.85 
   3   7  -1  161.60    3.56 
   3   7  -1  166.29    3.80 
   3   7  -1  171.26    3.60 
   3   7  -1  164.22    3.60 
   3   7  -1  165.66    3.79 
   3   7  -1  165.00    3.69 
   3   7  -1  162.28    3.77 
  -3  -7   1  166.19    3.79 
  -3  -7   1  168.43    3.70 
  -3  -7   1  164.09    3.80 
  -3  -7   1  161.65    3.71 
  -3  -7   1  165.50    3.67 
  -3  -7   1  165.33    3.63 
  -3  -7   1  168.51    4.02 
   2   7  -1  135.10    3.05 
   2   7  -1  129.53    3.07 
   2   7  -1  133.67    2.98 
   2   7  -1  137.09    3.02 
   2   7  -1  129.90    3.13 
   2   7  -1  135.03    3.12 
   2   7  -1  129.06    2.93 
  -2  -7   1  134.43    3.13 
  -2  -7   1  139.25    3.06 
  -2  -7   1  132.42    3.03 
  -2  -7   1  135.10    3.06 
  -2  -7   1  132.13    3.10 
  -2  -7   1  138.46    3.21 
  -2  -7   1  137.59    3.33 
   1   7  -1  122.78    2.84 
   1   7  -1  116.59    2.72 
   1   7  -1  119.44    2.76 
   1   7  -1  117.40    2.76 
   1   7  -1  122.39    2.78 
   1   7  -1  119.30    2.85 
   1   7  -1  119.47    2.73 
  -1  -7   1  124.44    2.87 
  -1  -7   1  128.41    2.97 
  -1  -7   1  121.14    2.78 
  -1  -7   1  122.57    2.78 
  -1  -7   1  119.29    3.00 
  -1  -7   1  120.79    2.83 
  -1  -7   1  123.78    2.78 
  -1  -7   1  120.49    2.85 
   0   7  -1   15.79    0.61 
   0   7  -1   15.11    0.50 
   0   7  -1   15.16    0.67 
   0   7  -1   14.93    0.61 
   0   7  -1   14.27    0.59 
   0   7  -1   14.14    0.65 
   0   7  -1   14.70    0.61 
   0  -7   1   15.14    0.68 
   0  -7   1   13.70    0.61 
   0  -7   1   14.32    0.67 
   0  -7   1   14.68    0.65 
   0  -7   1   15.54    0.69 
   0  -7   1   15.00    0.68 
   0  -7   1   15.70    0.66 
  -1   7  -1    4.76    0.40 
  -1   7  -1    3.96    0.38 
  -1   7  -1    3.68    0.40 
  -1   7  -1    3.93    0.39 
  -1   7  -1    3.95    0.38 
  -1   7  -1    3.70    0.41 
   1  -7   1    5.05    0.45 
   1  -7   1    3.70    0.41 
   1  -7   1    3.90    0.22 
   1  -7   1    3.65    0.39 
   1  -7   1    3.50    0.43 
   1  -7   1    4.46    0.42 
   1  -7   1    4.19    0.43 
   1  -7   1    3.70    0.44 
  -2   7  -1   34.39    1.06 
  -2   7  -1   35.36    1.09 
  -2   7  -1   33.45    1.13 
  -2   7  -1   32.81    1.05 
  -2   7  -1   34.57    1.07 
  -2   7  -1   33.55    1.11 
  -2   7  -1   35.16    1.08 
   2  -7   1   36.37    1.08 
   2  -7   1   33.99    1.08 
   2  -7   1   32.99    1.08 
   2  -7   1   32.84    1.13 
   2  -7   1   35.50    1.18 
   2  -7   1   35.70    1.13 
  -3   7  -1   47.92    1.38 
  -3   7  -1   48.86    1.41 
  -3   7  -1   48.75    1.48 
  -3   7  -1   46.97    1.41 
  -3   7  -1   46.99    1.39 
  -3   7  -1   45.87    1.45 
  -3   7  -1   47.41    1.41 
   3  -7   1   48.54    1.46 
   3  -7   1   47.67    1.38 
   3  -7   1   48.67    1.39 
   3  -7   1   47.45    1.49 
   3  -7   1   47.38    1.46 
   3  -7   1   48.56    1.32 
  -4   7  -1   65.05    1.75 
  -4   7  -1   62.45    1.78 
  -4   7  -1   64.13    1.76 
  -4   7  -1   64.70    1.83 
  -4   7  -1   63.65    1.85 
   4  -7   1   64.90    1.75 
   4  -7   1   63.07    1.73 
   4  -7   1   61.71    1.87 
   4  -7   1   66.61    1.74 
   4  -7   1   63.11    1.84 
  -5   7  -1    3.36    0.44 
  -5   7  -1    3.26    0.47 
  -5   7  -1    3.14    0.49 
  -5   7  -1    3.96    0.49 
  -5   7  -1    3.68    0.51 
   5  -7   1    4.30    0.47 
   5  -7   1    3.06    0.52 
   5  -7   1    3.53    0.44 
   5  -7   1    4.16    0.61 
   5  -7   1    3.23    0.43 
  -6   7  -1    0.74    0.41 
  -6   7  -1    1.02    0.32 
  -6   7  -1    1.91    0.43 
  -6   7  -1    0.84    0.38 
  -6   7  -1    1.40    0.45 
   6  -7   1    0.77    0.37 
   6  -7   1    1.10    0.45 
   6  -7   1    1.01    0.35 
   6  -7   1    0.58    0.34 
   6  -7   1    0.86    0.48 
  -7   7  -1    0.14    0.39 
  -7   7  -1    0.65    0.32 
  -7   7  -1   -0.06    0.36 
  -7   7  -1   -0.32    0.32 
  -7   7  -1    0.74    0.44 
   7  -7   1   -0.06    0.43 
   7  -7   1    0.24    0.35 
   7  -7   1   -0.82    0.42 
   7  -7   1    0.88    0.39 
   7  -7   1   -0.33    0.40 
  -8   7  -1    0.75    0.47 
  -8   7  -1    0.46    0.41 
  -8   7  -1    0.79    0.42 
  -8   7  -1    1.32    0.49 
   8  -7   1    1.14    0.55 
   8  -7   1    1.34    0.43 
   8  -7   1    0.93    0.36 
   8  -7   1    1.45    0.60 
   8  -7   1    1.61    0.53 
  -9   7  -1    0.40    0.49 
  -9   7  -1    0.64    0.45 
  -9   7  -1    0.06    0.46 
  -9   7  -1    0.00    0.46 
   9  -7   1    0.20    0.59 
   9  -7   1    0.68    0.44 
   9  -7   1   -0.03    0.53 
   9  -7   1    0.58    0.41 
   9  -7   1    0.45    0.50 
 -10   7  -1    3.65    0.69 
 -10   7  -1    3.57    0.73 
 -10   7  -1    4.28    0.72 
 -10   7  -1    3.33    0.68 
  10  -7   1    3.44    0.68 
  10  -7   1    3.10    0.60 
  10  -7   1    2.14    0.67 
  10  -7   1    3.31    0.64 
  10  -7   1    2.54    0.75 
 -11   7  -1    8.70    0.98 
 -11   7  -1    7.23    0.89 
 -11   7  -1    4.85    0.88 
 -11   7  -1    6.34    0.85 
  11  -7   1    5.06    0.91 
  11  -7   1    7.49    0.84 
  11  -7   1    6.74    0.80 
  11  -7   1    4.33    0.83 
  11  -7   1    6.22    0.86 
 -12   7  -1   -0.29    0.55 
 -12   7  -1   -0.32    0.61 
 -12   7  -1    0.02    0.53 
 -12   7  -1   -0.50    0.62 
  12  -7   1    0.18    0.44 
  12  -7   1    0.29    0.74 
  12  -7   1   -0.56    0.58 
  12  -7   1    0.06    0.51 
  12  -7   1    0.20    0.59 
  16   6  -1   27.58    1.55 
  16   6  -1   32.44    1.54 
  16   6  -1   26.68    1.61 
  16   6  -1   29.69    1.35 
 -16  -6   1   29.61    1.61 
  15   6  -1   15.25    1.18 
  15   6  -1   13.43    1.34 
  15   6  -1   12.79    1.07 
  15   6  -1   14.64    0.99 
 -15  -6   1   13.34    1.19 
 -15  -6   1   15.84    1.18 
  14   6  -1   10.36    1.12 
  14   6  -1   12.49    1.00 
  14   6  -1   13.65    0.91 
  14   6  -1   11.34    1.10 
 -14  -6   1   13.65    1.10 
 -14  -6   1   12.59    1.09 
 -14  -6   1   13.70    1.07 
 -14  -6   1   12.57    1.06 
  13   6  -1    0.85    0.58 
  13   6  -1    1.63    0.52 
  13   6  -1    2.24    0.64 
  13   6  -1    1.97    0.48 
 -13  -6   1    1.65    0.53 
 -13  -6   1    2.86    0.59 
 -13  -6   1    1.74    0.54 
 -13  -6   1    1.67    0.59 
  12   6  -1    0.99    0.40 
  12   6  -1    0.23    0.51 
  12   6  -1    0.95    0.52 
  12   6  -1    0.77    0.43 
 -12  -6   1    1.26    0.48 
 -12  -6   1    0.73    0.45 
 -12  -6   1    1.09    0.45 
 -12  -6   1    0.61    0.52 
 -12  -6   1    1.29    0.45 
  11   6  -1    9.32    0.88 
  11   6  -1    7.64    0.84 
  11   6  -1    9.28    0.70 
  11   6  -1   10.41    0.81 
 -11  -6   1    8.96    0.81 
 -11  -6   1    9.50    0.88 
 -11  -6   1    9.26    0.74 
 -11  -6   1    9.24    0.76 
 -11  -6   1    9.13    0.77 
  10   6  -1    0.16    0.41 
  10   6  -1    0.58    0.33 
  10   6  -1    0.39    0.45 
  10   6  -1   -0.02    0.35 
 -10  -6   1   -0.27    0.35 
 -10  -6   1    0.29    0.42 
 -10  -6   1   -0.21    0.38 
 -10  -6   1    0.59    0.37 
 -10  -6   1   -0.28    0.35 
   9   6  -1    1.14    0.45 
   9   6  -1    0.81    0.36 
   9   6  -1    0.49    0.40 
   9   6  -1    1.16    0.31 
  -9  -6   1    0.81    0.38 
  -9  -6   1    0.82    0.35 
  -9  -6   1    1.24    0.46 
  -9  -6   1    1.01    0.41 
  -9  -6   1    0.67    0.39 
   8   6  -1   28.85    1.08 
   8   6  -1   27.93    0.95 
   8   6  -1   29.08    1.15 
   8   6  -1   27.46    1.11 
   8   6  -1   28.08    0.79 
  -8  -6   1   27.63    0.97 
  -8  -6   1   25.52    1.12 
  -8  -6   1   27.33    1.03 
  -8  -6   1   27.59    1.01 
  -8  -6   1   26.43    0.98 
  -8  -6   1   30.26    1.22 
  -8  -6   1   26.85    1.01 
   7   6  -1    7.80    0.58 
   7   6  -1    7.62    0.65 
   7   6  -1    6.94    0.37 
   7   6  -1    7.29    0.63 
   7   6  -1    6.82    0.46 
   7   6  -1    7.30    0.49 
   7   6  -1    6.71    0.32 
   7   6  -1    7.10    0.51 
  -7  -6   1    7.41    0.53 
  -7  -6   1    6.89    0.49 
  -7  -6   1    7.99    0.64 
  -7  -6   1    6.98    0.49 
  -7  -6   1    7.35    0.67 
  -7  -6   1    7.15    0.47 
  -7  -6   1    6.64    0.52 
   6   6  -1   15.44    0.76 
   6   6  -1   16.44    0.66 
   6   6  -1   15.01    0.62 
   6   6  -1   15.61    0.71 
   6   6  -1   15.44    0.49 
   6   6  -1   16.26    0.66 
   6   6  -1   15.61    0.58 
   6   6  -1   15.35    0.74 
  -6  -6   1   15.40    0.82 
  -6  -6   1   15.69    0.65 
  -6  -6   1   16.05    0.68 
  -6  -6   1   15.75    0.67 
  -6  -6   1   15.50    0.71 
  -6  -6   1   15.34    0.65 
   5   6  -1   10.29    0.59 
   5   6  -1   10.30    0.38 
   5   6  -1   10.17    0.50 
   5   6  -1   10.67    0.49 
   5   6  -1   10.41    0.47 
   5   6  -1   10.14    0.50 
   5   6  -1   10.39    0.57 
   5   6  -1   10.40    0.56 
  -5  -6   1    9.16    0.55 
  -5  -6   1   10.16    0.51 
  -5  -6   1    9.69    0.53 
  -5  -6   1    9.86    0.41 
  -5  -6   1   10.55    0.52 
  -5  -6   1   10.82    0.67 
  -5  -6   1   10.32    0.50 
   4   6  -1    0.65    0.23 
   4   6  -1    0.47    0.25 
   4   6  -1    0.61    0.23 
   4   6  -1    0.46    0.17 
   4   6  -1    0.45    0.19 
   4   6  -1    0.37    0.20 
   4   6  -1    0.41    0.18 
  -4  -6   1    0.57    0.24 
  -4  -6   1    0.67    0.24 
  -4  -6   1    0.46    0.18 
  -4  -6   1    0.56    0.28 
  -4  -6   1    0.54    0.22 
  -4  -6   1    0.34    0.20 
  -4  -6   1    0.59    0.21 
   3   6  -1  320.68    6.99 
   3   6  -1  309.33    6.56 
   3   6  -1  317.83    6.53 
   3   6  -1  313.82    6.65 
   3   6  -1  314.07    6.82 
   3   6  -1  319.69    6.89 
   3   6  -1  322.11    6.42 
  -3  -6   1  316.56    6.88 
  -3  -6   1  321.94    6.89 
  -3  -6   1  318.41    6.56 
  -3  -6   1  315.75    6.73 
  -3  -6   1  315.95    6.66 
  -3  -6   1  319.19    6.72 
  -3  -6   1  314.26    7.16 
   2   6  -1  153.68    3.42 
   2   6  -1  150.56    3.33 
   2   6  -1  160.06    3.37 
   2   6  -1  156.93    3.54 
   2   6  -1  158.54    3.37 
   2   6  -1  156.98    3.53 
   2   6  -1  157.14    3.54 
  -2  -6   1  157.20    3.49 
  -2  -6   1  154.30    3.40 
  -2  -6   1  153.80    3.56 
  -2  -6   1  154.76    3.46 
  -2  -6   1  159.26    3.58 
  -2  -6   1  158.45    3.74 
  -2  -6   1  156.98    3.44 
   1   6  -1   68.69    1.68 
   1   6  -1   68.64    1.63 
   1   6  -1   66.22    1.65 
   1   6  -1   68.64    1.68 
   1   6  -1   65.41    1.59 
   1   6  -1   61.20    1.58 
   1   6  -1   67.82    1.71 
  -1  -6   1   69.62    1.72 
  -1  -6   1   68.68    1.68 
  -1  -6   1   70.09    1.79 
  -1  -6   1   67.15    1.81 
  -1  -6   1   67.51    1.70 
  -1  -6   1   69.46    1.67 
  -1  -6   1   65.15    1.66 
  -1  -6   1   67.60    1.66 
   0   6  -1   13.10    0.55 
   0   6  -1   14.11    0.45 
   0   6  -1   12.75    0.53 
   0   6  -1   14.40    0.61 
   0   6  -1   13.93    0.56 
   0   6  -1   14.21    0.54 
   0   6  -1   13.66    0.59 
   0  -6   1   13.85    0.57 
   0  -6   1   14.19    0.61 
   0  -6   1   13.49    0.61 
   0  -6   1   13.36    0.59 
   0  -6   1   13.70    0.61 
   0  -6   1   14.41    0.62 
   0  -6   1   14.00    0.58 
  -1   6  -1    1.51    0.24 
  -1   6  -1    1.64    0.27 
  -1   6  -1    1.59    0.28 
  -1   6  -1    2.07    0.31 
  -1   6  -1    1.79    0.26 
  -1   6  -1    2.31    0.29 
   1  -6   1    1.71    0.31 
   1  -6   1    2.28    0.30 
   1  -6   1    2.40    0.32 
   1  -6   1    1.82    0.33 
   1  -6   1    1.90    0.30 
   1  -6   1    1.22    0.25 
   1  -6   1    1.81    0.28 
   1  -6   1    1.68    0.15 
  -2   6  -1   23.78    0.80 
  -2   6  -1   23.48    0.78 
  -2   6  -1   23.97    0.80 
  -2   6  -1   23.18    0.79 
  -2   6  -1   21.35    0.85 
  -2   6  -1   23.01    0.83 
  -2   6  -1   22.30    0.77 
   2  -6   1   22.90    0.84 
   2  -6   1   23.05    0.85 
   2  -6   1   24.36    0.82 
   2  -6   1   23.09    0.78 
   2  -6   1   24.98    0.82 
   2  -6   1   23.30    0.81 
   2  -6   1   23.52    0.88 
  -3   6  -1   64.97    1.70 
  -3   6  -1   65.30    1.66 
  -3   6  -1   63.93    1.69 
  -3   6  -1   64.96    1.66 
  -3   6  -1   65.14    1.73 
  -3   6  -1   62.52    1.65 
  -3   6  -1   63.07    1.66 
  -3   6  -1   63.17    1.75 
   3  -6   1   65.54    1.77 
   3  -6   1   62.78    1.78 
   3  -6   1   64.39    1.75 
   3  -6   1   64.14    1.66 
   3  -6   1   63.08    1.49 
   3  -6   1   64.96    1.66 
   3  -6   1   65.51    1.65 
   3  -6   1   65.76    1.61 
  -4   6  -1   25.54    0.91 
  -4   6  -1   24.52    0.94 
  -4   6  -1   25.34    0.91 
  -4   6  -1   24.44    0.90 
  -4   6  -1   25.23    0.95 
   4  -6   1   24.86    0.88 
   4  -6   1   25.27    1.01 
   4  -6   1   24.82    0.97 
   4  -6   1   25.73    0.89 
   4  -6   1   24.52    0.78 
   4  -6   1   25.06    0.87 
  -5   6  -1    0.43    0.25 
  -5   6  -1    0.20    0.28 
  -5   6  -1    0.52    0.31 
  -5   6  -1    0.76    0.34 
  -5   6  -1    0.61    0.33 
   5  -6   1    0.25    0.38 
   5  -6   1    0.37    0.28 
   5  -6   1    0.12    0.32 
   5  -6   1    0.32    0.28 
   5  -6   1    0.77    0.37 
  -6   6  -1    2.38    0.47 
  -6   6  -1    2.13    0.43 
  -6   6  -1    2.05    0.35 
  -6   6  -1    1.79    0.39 
  -6   6  -1    2.05    0.43 
   6  -6   1    1.09    0.43 
   6  -6   1    1.45    0.46 
   6  -6   1    2.01    0.44 
   6  -6   1    2.09    0.37 
   6  -6   1    1.89    0.36 
  -7   6  -1   12.86    0.85 
  -7   6  -1   12.19    0.67 
  -7   6  -1   13.01    0.80 
  -7   6  -1   12.21    0.78 
  -7   6  -1   11.72    0.76 
   7  -6   1   12.97    0.87 
   7  -6   1   11.74    0.79 
   7  -6   1   11.95    0.71 
   7  -6   1   12.18    0.72 
   7  -6   1   11.11    0.84 
  -8   6  -1   -0.39    0.39 
  -8   6  -1   -0.14    0.34 
  -8   6  -1    0.85    0.44 
  -8   6  -1    0.07    0.34 
   8  -6   1    0.28    0.44 
   8  -6   1    0.25    0.36 
   8  -6   1   -0.31    0.38 
   8  -6   1    0.51    0.51 
   8  -6   1    0.41    0.33 
  -9   6  -1    4.14    0.66 
  -9   6  -1    4.90    0.70 
  -9   6  -1    5.68    0.67 
  -9   6  -1    6.02    0.69 
   9  -6   1    4.88    0.61 
   9  -6   1    4.22    0.70 
   9  -6   1    4.18    0.72 
   9  -6   1    5.82    0.64 
   9  -6   1    4.94    0.66 
 -10   6  -1   11.22    0.95 
 -10   6  -1   12.54    1.01 
 -10   6  -1   11.21    0.91 
 -10   6  -1   13.37    1.04 
  10  -6   1   11.68    0.85 
  10  -6   1   12.62    0.90 
  10  -6   1   11.10    1.02 
  10  -6   1   11.15    1.06 
  10  -6   1   12.14    0.95 
 -11   6  -1   32.51    1.47 
 -11   6  -1   31.23    1.45 
 -11   6  -1   30.63    1.55 
 -11   6  -1   32.34    1.51 
  11  -6   1   28.91    1.50 
  11  -6   1   29.95    1.31 
  11  -6   1   29.65    1.32 
  11  -6   1   27.95    1.54 
  11  -6   1   31.12    1.46 
 -12   6  -1    3.93    0.73 
 -12   6  -1    3.03    0.74 
 -12   6  -1    2.46    0.78 
 -12   6  -1    2.20    0.66 
  12  -6   1    1.67    0.71 
  12  -6   1    2.95    0.60 
  12  -6   1    2.54    0.61 
  12  -6   1    3.71    0.73 
  12  -6   1    2.89    0.84 
  16   5  -1    7.39    0.98 
  16   5  -1    7.30    0.79 
  16   5  -1    5.67    0.98 
  16   5  -1    7.24    0.85 
 -16  -5   1    4.95    0.77 
 -16  -5   1    7.81    1.05 
  15   5  -1    0.09    0.60 
  15   5  -1    0.55    0.65 
  15   5  -1    0.70    0.49 
  15   5  -1   -0.17    0.49 
 -15  -5   1    0.42    0.66 
 -15  -5   1    0.07    0.56 
  14   5  -1    4.77    0.72 
  14   5  -1    5.63    0.65 
  14   5  -1    5.43    0.84 
  14   5  -1    5.06    0.82 
  14   5  -1    4.63    0.70 
 -14  -5   1    4.91    0.83 
 -14  -5   1    5.36    0.78 
 -14  -5   1    4.82    0.78 
 -14  -5   1    4.85    0.73 
  13   5  -1    6.28    0.72 
  13   5  -1    4.55    0.65 
  13   5  -1    4.71    0.77 
  13   5  -1    5.68    0.64 
  13   5  -1    5.67    0.83 
 -13  -5   1    5.96    0.75 
 -13  -5   1    6.35    0.75 
 -13  -5   1    4.40    0.68 
 -13  -5   1    6.10    0.80 
  12   5  -1    0.55    0.51 
  12   5  -1    0.87    0.41 
  12   5  -1    1.21    0.50 
  12   5  -1    1.02    0.45 
  12   5  -1    0.82    0.43 
 -12  -5   1    0.66    0.42 
 -12  -5   1    1.00    0.44 
 -12  -5   1    1.01    0.52 
 -12  -5   1    0.54    0.43 
 -12  -5   1    0.50    0.43 
  11   5  -1    4.48    0.53 
  11   5  -1    4.77    0.68 
  11   5  -1    3.87    0.63 
  11   5  -1    4.84    0.60 
  11   5  -1    4.34    0.57 
 -11  -5   1    4.64    0.61 
 -11  -5   1    3.94    0.63 
 -11  -5   1    3.94    0.58 
 -11  -5   1    4.59    0.60 
 -11  -5   1    3.03    0.52 
  10   5  -1    3.70    0.49 
  10   5  -1    4.11    0.47 
  10   5  -1    3.88    0.53 
  10   5  -1    3.79    0.60 
  10   5  -1    3.99    0.60 
 -10  -5   1    4.92    0.57 
 -10  -5   1    4.00    0.60 
 -10  -5   1    4.39    0.55 
 -10  -5   1    4.82    0.58 
 -10  -5   1    4.82    0.64 
   9   5  -1    8.68    0.74 
   9   5  -1    9.01    0.72 
   9   5  -1    8.68    0.56 
   9   5  -1    8.14    0.64 
  -9  -5   1    8.02    0.62 
  -9  -5   1    8.13    0.68 
  -9  -5   1    8.67    0.69 
  -9  -5   1    8.27    0.65 
  -9  -5   1    7.85    0.74 
   8   5  -1   55.70    1.38 
   8   5  -1   56.31    1.62 
   8   5  -1   57.28    1.77 
   8   5  -1   53.88    1.27 
   8   5  -1   56.50    1.50 
   8   5  -1   57.75    1.72 
  -8  -5   1   57.27    1.56 
  -8  -5   1   56.68    1.63 
  -8  -5   1   54.16    1.55 
  -8  -5   1   57.52    1.64 
  -8  -5   1   58.96    1.78 
  -8  -5   1   54.18    1.61 
  -8  -5   1   55.74    1.61 
   7   5  -1   11.55    0.55 
   7   5  -1   13.08    0.59 
   7   5  -1   11.44    0.43 
   7   5  -1   12.55    0.68 
   7   5  -1   12.35    0.70 
   7   5  -1   12.00    0.43 
   7   5  -1   12.37    0.66 
  -7  -5   1   10.97    0.60 
  -7  -5   1   11.55    0.62 
  -7  -5   1   12.73    0.58 
  -7  -5   1   12.70    0.62 
  -7  -5   1   11.76    0.62 
  -7  -5   1   11.02    0.57 
  -7  -5   1   13.01    0.72 
   6   5  -1   30.62    1.00 
   6   5  -1   29.31    1.03 
   6   5  -1   30.70    0.96 
   6   5  -1   29.64    0.78 
   6   5  -1   29.68    0.94 
   6   5  -1   31.01    1.06 
   6   5  -1   30.11    0.81 
   6   5  -1   30.09    0.90 
  -6  -5   1   28.79    0.95 
  -6  -5   1   29.62    0.91 
  -6  -5   1   29.65    0.97 
  -6  -5   1   30.63    1.11 
  -6  -5   1   30.13    0.96 
  -6  -5   1   29.71    0.99 
  -6  -5   1   29.22    0.93 
   5   5  -1   19.93    0.78 
   5   5  -1   20.01    0.68 
   5   5  -1   20.54    0.72 
   5   5  -1   20.83    0.76 
   5   5  -1   21.02    0.70 
   5   5  -1   20.42    0.64 
   5   5  -1   19.10    0.57 
   5   5  -1   18.71    0.78 
  -5  -5   1   19.99    0.71 
  -5  -5   1   21.60    0.87 
  -5  -5   1   19.38    0.69 
  -5  -5   1   21.61    0.73 
  -5  -5   1   20.32    0.71 
  -5  -5   1   20.77    0.76 
   4   5  -1  120.46    2.76 
   4   5  -1  121.70    2.67 
   4   5  -1  121.93    2.82 
   4   5  -1  120.75    2.68 
   4   5  -1  118.32    2.83 
   4   5  -1  119.16    2.65 
   4   5  -1  124.08    2.91 
   4   5  -1  123.36    2.62 
  -4  -5   1  125.10    3.03 
  -4  -5   1  118.95    2.68 
  -4  -5   1  122.44    2.79 
  -4  -5   1  123.46    2.77 
  -4  -5   1  124.99    2.77 
  -4  -5   1  122.37    2.80 
  -4  -5   1  122.06    2.68 
   3   5  -1  286.24    6.00 
   3   5  -1  283.37    5.88 
   3   5  -1  292.45    6.22 
   3   5  -1  289.56    6.33 
   3   5  -1  282.22    5.92 
   3   5  -1  298.15    5.78 
   3   5  -1  280.51    6.14 
  -3  -5   1  278.97    6.06 
  -3  -5   1  284.90    6.20 
  -3  -5   1  287.99    6.00 
  -3  -5   1  285.25    5.90 
  -3  -5   1  284.87    6.19 
  -3  -5   1  293.85    6.47 
  -3  -5   1  283.39    6.05 
   2   5  -1    7.26    0.41 
   2   5  -1    7.88    0.40 
   2   5  -1    7.23    0.39 
   2   5  -1    7.01    0.34 
   2   5  -1    7.50    0.37 
   2   5  -1    7.05    0.32 
   2   5  -1    7.13    0.37 
  -2  -5   1    7.56    0.40 
  -2  -5   1    7.54    0.40 
  -2  -5   1    7.55    0.37 
  -2  -5   1    7.77    0.42 
  -2  -5   1    7.72    0.48 
  -2  -5   1    7.69    0.39 
  -2  -5   1    7.62    0.40 
   1   5  -1   11.70    0.47 
   1   5  -1   12.68    0.51 
   1   5  -1   10.88    0.42 
   1   5  -1   11.02    0.39 
   1   5  -1   11.21    0.46 
   1   5  -1   11.12    0.49 
   1   5  -1   12.49    0.48 
  -1  -5   1   11.71    0.51 
  -1  -5   1   11.66    0.48 
  -1  -5   1   13.44    0.56 
  -1  -5   1   11.64    0.50 
  -1  -5   1   12.28    0.56 
  -1  -5   1   11.83    0.49 
  -1  -5   1   11.36    0.49 
   0   5  -1   22.12    0.71 
   0   5  -1   23.56    0.69 
   0   5  -1   23.41    0.75 
   0   5  -1   23.56    0.78 
   0   5  -1   23.14    0.62 
   0   5  -1   22.81    0.70 
   0   5  -1   23.49    0.71 
   0  -5   1   22.22    0.75 
   0  -5   1   23.05    0.73 
   0  -5   1   23.71    0.78 
   0  -5   1   24.36    0.75 
   0  -5   1   23.92    0.74 
   0  -5   1   22.96    0.77 
   0  -5   1   22.82    0.75 
  -1   5  -1  141.41    2.94 
  -1   5  -1  135.07    2.93 
  -1   5  -1  130.63    3.07 
  -1   5  -1  129.22    2.94 
  -1   5  -1  131.98    3.02 
  -1   5  -1  135.94    2.92 
   1  -5   1  133.15    3.07 
   1  -5   1  129.49    2.93 
   1  -5   1  142.40    2.92 
   1  -5   1  131.76    3.08 
   1  -5   1  132.87    3.10 
   1  -5   1  133.78    2.94 
   1  -5   1  134.72    3.04 
   1  -5   1  132.57    3.06 
  -2   5  -1  106.44    2.61 
  -2   5  -1  107.31    2.56 
  -2   5  -1  111.58    2.48 
  -2   5  -1  113.49    2.50 
  -2   5  -1  107.58    2.49 
  -2   5  -1  107.08    2.59 
  -2   5  -1  109.26    2.48 
   2  -5   1  112.88    2.58 
   2  -5   1  112.47    2.63 
   2  -5   1  112.98    2.59 
   2  -5   1  109.05    2.48 
   2  -5   1  112.36    2.43 
   2  -5   1  114.82    2.65 
   2  -5   1  109.76    2.50 
   2  -5   1  110.96    2.59 
  -3   5  -1   89.80    2.12 
  -3   5  -1   90.75    2.11 
  -3   5  -1   87.48    2.22 
  -3   5  -1   89.72    2.18 
  -3   5  -1   86.89    2.11 
  -3   5  -1   88.27    2.12 
  -3   5  -1   90.32    2.23 
  -3   5  -1   90.65    2.18 
   3  -5   1   93.01    2.27 
   3  -5   1   91.50    2.12 
   3  -5   1   88.56    2.10 
   3  -5   1   91.22    2.10 
   3  -5   1   92.03    2.19 
   3  -5   1   90.53    2.04 
   3  -5   1   90.01    2.26 
   3  -5   1   89.98    2.10 
   3  -5   1   91.15    2.22 
  -4   5  -1    0.39    0.25 
  -4   5  -1    0.88    0.22 
  -4   5  -1    0.57    0.27 
  -4   5  -1    0.92    0.29 
  -4   5  -1    0.53    0.21 
  -4   5  -1    0.44    0.21 
  -4   5  -1    0.42    0.23 
   4  -5   1    0.61    0.23 
   4  -5   1    0.84    0.30 
   4  -5   1    0.79    0.30 
   4  -5   1    0.58    0.14 
   4  -5   1    0.70    0.17 
   4  -5   1    0.85    0.32 
   4  -5   1    0.87    0.25 
  -5   5  -1    1.87    0.33 
  -5   5  -1    2.71    0.42 
  -5   5  -1    2.27    0.32 
  -5   5  -1    2.01    0.35 
  -5   5  -1    1.59    0.36 
   5  -5   1    1.97    0.38 
   5  -5   1    2.22    0.33 
   5  -5   1    1.64    0.24 
   5  -5   1    1.90    0.40 
   5  -5   1    2.06    0.40 
   5  -5   1    1.56    0.31 
  -6   5  -1   13.96    0.73 
  -6   5  -1   14.01    0.79 
  -6   5  -1   14.48    0.65 
  -6   5  -1   15.44    0.75 
  -6   5  -1   14.22    0.74 
   6  -5   1   14.59    0.63 
   6  -5   1   15.46    0.78 
   6  -5   1   14.21    0.66 
   6  -5   1   13.92    0.81 
   6  -5   1   14.83    0.69 
   6  -5   1   13.69    0.79 
  -7   5  -1   10.20    0.69 
  -7   5  -1   10.22    0.76 
  -7   5  -1   10.33    0.68 
  -7   5  -1    9.90    0.69 
  -7   5  -1    9.87    0.56 
   7  -5   1    9.11    0.65 
   7  -5   1    9.64    0.62 
   7  -5   1   10.01    0.63 
   7  -5   1    9.73    0.76 
   7  -5   1    9.79    0.76 
  -8   5  -1    1.98    0.50 
  -8   5  -1    2.09    0.48 
  -8   5  -1    1.86    0.37 
  -8   5  -1    2.14    0.46 
  -8   5  -1    2.68    0.49 
   8  -5   1    1.86    0.38 
   8  -5   1    2.08    0.50 
   8  -5   1    1.93    0.45 
   8  -5   1    2.59    0.58 
   8  -5   1    2.61    0.42 
  -9   5  -1   10.20    0.76 
  -9   5  -1   10.45    0.82 
  -9   5  -1    9.10    0.79 
  -9   5  -1    8.50    0.87 
   9  -5   1    9.00    0.87 
   9  -5   1    9.54    0.70 
   9  -5   1    9.81    0.75 
   9  -5   1    8.53    0.84 
   9  -5   1    9.51    0.77 
 -10   5  -1   30.07    1.44 
 -10   5  -1   30.96    1.31 
 -10   5  -1   30.38    1.36 
 -10   5  -1   29.28    1.33 
  10  -5   1   27.27    1.38 
  10  -5   1   30.82    1.20 
  10  -5   1   32.51    1.24 
  10  -5   1   30.13    1.31 
  10  -5   1   30.08    1.36 
 -11   5  -1   24.68    1.29 
 -11   5  -1   25.99    1.25 
 -11   5  -1   22.87    1.32 
 -11   5  -1   21.85    1.19 
  11  -5   1   22.81    1.12 
  11  -5   1   22.52    1.32 
  11  -5   1   22.80    1.22 
  11  -5   1   22.41    1.32 
  11  -5   1   22.42    1.10 
 -12   5  -1    1.26    0.69 
 -12   5  -1    2.61    0.65 
 -12   5  -1    2.14    0.60 
 -12   5  -1    2.09    0.63 
  12  -5   1    2.12    0.76 
  12  -5   1    1.82    0.50 
  12  -5   1    1.92    0.65 
  12  -5   1    1.95    0.63 
  12  -5   1    2.97    0.61 
 -13   5  -1   14.40    1.13 
 -13   5  -1   11.51    1.18 
 -13   5  -1   16.57    1.16 
 -13   5  -1   13.29    1.18 
  13  -5   1   13.90    1.01 
  13  -5   1   13.42    1.00 
  13  -5   1   12.52    1.19 
  13  -5   1   12.59    1.21 
  16   4  -1    5.70    0.97 
  16   4  -1    6.21    0.76 
  16   4  -1    5.90    0.92 
  16   4  -1    5.56    0.83 
 -16  -4   1    4.75    0.80 
 -16  -4   1    4.68    0.91 
  15   4  -1    0.94    0.63 
  15   4  -1    0.89    0.60 
  15   4  -1    1.48    0.52 
  15   4  -1    1.06    0.55 
  15   4  -1    1.08    0.67 
 -15  -4   1    1.47    0.61 
 -15  -4   1    0.15    0.67 
  14   4  -1    6.08    0.76 
  14   4  -1    4.99    0.69 
  14   4  -1    5.27    0.66 
  14   4  -1    5.20    0.86 
  14   4  -1    6.05    0.87 
 -14  -4   1    5.33    0.79 
 -14  -4   1    5.50    0.77 
 -14  -4   1    7.97    0.90 
 -14  -4   1    6.79    0.91 
  13   4  -1    0.04    0.45 
  13   4  -1    0.07    0.37 
  13   4  -1   -0.34    0.49 
  13   4  -1    0.04    0.43 
  13   4  -1   -0.28    0.41 
 -13  -4   1    1.22    0.47 
 -13  -4   1    0.33    0.46 
 -13  -4   1    0.30    0.56 
 -13  -4   1    0.45    0.49 
  12   4  -1    0.27    0.45 
  12   4  -1    0.34    0.37 
  12   4  -1   -0.26    0.39 
  12   4  -1    0.40    0.37 
  12   4  -1    0.43    0.50 
 -12  -4   1    0.59    0.45 
 -12  -4   1   -0.29    0.43 
 -12  -4   1    0.73    0.42 
 -12  -4   1    0.24    0.50 
  11   4  -1    4.15    0.64 
  11   4  -1    3.88    0.51 
  11   4  -1    4.44    0.58 
  11   4  -1    3.54    0.55 
  11   4  -1    4.99    0.68 
 -11  -4   1    3.83    0.57 
 -11  -4   1    4.47    0.61 
 -11  -4   1    4.38    0.66 
 -11  -4   1    5.56    0.63 
 -11  -4   1    3.61    0.58 
  10   4  -1   46.65    1.38 
  10   4  -1   46.77    1.51 
  10   4  -1   45.55    1.60 
  10   4  -1   45.24    1.41 
  10   4  -1   43.41    1.62 
 -10  -4   1   45.52    1.55 
 -10  -4   1   45.60    1.52 
 -10  -4   1   46.59    1.54 
 -10  -4   1   44.18    1.47 
 -10  -4   1   47.16    1.51 
   9   4  -1  125.60    3.35 
   9   4  -1  128.27    2.95 
   9   4  -1  126.08    3.22 
   9   4  -1  130.69    3.11 
   9   4  -1  127.32    3.03 
   9   4  -1  124.55    2.91 
  -9  -4   1  126.63    3.21 
  -9  -4   1  129.85    3.13 
  -9  -4   1  128.58    3.17 
  -9  -4   1  125.88    3.06 
  -9  -4   1  132.90    3.28 
   8   4  -1  123.72    2.84 
   8   4  -1  128.23    3.00 
   8   4  -1  125.09    2.82 
   8   4  -1  126.89    2.92 
   8   4  -1  125.29    3.10 
   8   4  -1  121.91    3.22 
  -8  -4   1  127.43    2.93 
  -8  -4   1  124.09    3.08 
  -8  -4   1  125.55    3.05 
  -8  -4   1  126.85    3.00 
  -8  -4   1  129.03    3.18 
  -8  -4   1  120.14    2.97 
  -8  -4   1  123.70    2.95 
   7   4  -1    7.68    0.46 
   7   4  -1    7.38    0.56 
   7   4  -1    8.34    0.47 
   7   4  -1    7.77    0.55 
   7   4  -1    7.60    0.31 
   7   4  -1    7.43    0.36 
   7   4  -1    7.33    0.56 
   7   4  -1    8.88    0.48 
  -7  -4   1    7.85    0.52 
  -7  -4   1    7.26    0.48 
  -7  -4   1    7.64    0.52 
  -7  -4   1    7.61    0.58 
  -7  -4   1    7.93    0.48 
  -7  -4   1    8.24    0.53 
  -7  -4   1    8.12    0.52 
   6   4  -1   73.92    1.87 
   6   4  -1   73.44    1.76 
   6   4  -1   73.60    1.70 
   6   4  -1   75.65    1.89 
   6   4  -1   76.38    2.02 
   6   4  -1   74.34    1.61 
   6   4  -1   73.63    1.94 
  -6  -4   1   76.56    1.90 
  -6  -4   1   74.98    1.85 
  -6  -4   1   73.36    1.80 
  -6  -4   1   76.63    2.03 
  -6  -4   1   71.70    1.88 
  -6  -4   1   71.91    1.86 
  -6  -4   1   73.08    1.80 
   5   4  -1  177.07    3.81 
   5   4  -1  179.35    3.91 
   5   4  -1  183.18    4.21 
   5   4  -1  182.42    4.06 
   5   4  -1  179.08    4.06 
   5   4  -1  176.49    3.84 
   5   4  -1  179.32    3.94 
   5   4  -1  186.19    3.67 
  -5  -4   1  179.45    3.88 
  -5  -4   1  177.31    4.05 
  -5  -4   1  182.36    4.06 
  -5  -4   1  183.32    3.98 
  -5  -4   1  181.04    3.86 
  -5  -4   1  181.91    3.95 
  -5  -4   1  186.20    4.25 
   4   4  -1  880.42   18.14 
   4   4  -1  906.15   17.90 
   4   4  -1  912.32   19.33 
   4   4  -1  884.08   18.59 
   4   4  -1  902.38   18.92 
   4   4  -1  918.24   17.36 
   4   4  -1  895.45   18.20 
   4   4  -1  874.34   18.48 
  -4  -4   1  881.60   18.89 
  -4  -4   1  936.84   19.41 
  -4  -4   1  905.39   18.95 
  -4  -4   1  895.77   18.15 
  -4  -4   1  901.15   17.93 
  -4  -4   1  899.65   18.46 
   3   4  -1  232.06    5.08 
   3   4  -1  229.66    4.97 
   3   4  -1  221.23    4.91 
   3   4  -1  232.11    4.59 
   3   4  -1  227.26    4.74 
   3   4  -1  223.39    4.69 
   3   4  -1  225.13    4.79 
  -3  -4   1  228.70    4.84 
  -3  -4   1  237.19    5.18 
  -3  -4   1  226.81    4.71 
  -3  -4   1  224.10    4.79 
  -3  -4   1  229.31    4.81 
  -3  -4   1  231.16    4.95 
  -3  -4   1  224.24    4.93 
   2   4  -1    0.46    0.17 
   2   4  -1    0.39    0.14 
   2   4  -1    0.49    0.13 
   2   4  -1    0.43    0.17 
   2   4  -1    0.26    0.13 
   2   4  -1    0.50    0.15 
   2   4  -1    0.40    0.15 
  -2  -4   1    0.36    0.15 
  -2  -4   1    0.33    0.21 
  -2  -4   1    0.52    0.16 
  -2  -4   1    0.53    0.17 
  -2  -4   1    0.50    0.18 
  -2  -4   1    0.46    0.18 
  -2  -4   1    0.62    0.16 
   1   4  -1    0.12    0.12 
   1   4  -1    0.19    0.12 
   1   4  -1    0.00    0.13 
   1   4  -1    0.04    0.12 
   1   4  -1    0.04    0.12 
   1   4  -1    0.20    0.14 
   1   4  -1    0.18    0.15 
  -1  -4   1    0.21    0.16 
  -1  -4   1    0.11    0.18 
  -1  -4   1    0.29    0.16 
  -1  -4   1    0.37    0.17 
  -1  -4   1    0.31    0.16 
  -1  -4   1    0.25    0.19 
  -1  -4   1    0.01    0.19 
   0   4  -1    4.14    0.26 
   0   4  -1    4.49    0.31 
   0   4  -1    4.37    0.28 
   0   4  -1    4.45    0.29 
   0   4  -1    4.45    0.32 
   0   4  -1    4.81    0.28 
   0   4  -1    4.54    0.20 
   0  -4   1    4.84    0.34 
   0  -4   1    4.70    0.36 
   0  -4   1    4.19    0.29 
   0  -4   1    4.28    0.32 
   0  -4   1    4.05    0.31 
   0  -4   1    4.93    0.32 
   0  -4   1    4.09    0.32 
  -1   4  -1   69.72    1.64 
  -1   4  -1   69.50    1.73 
  -1   4  -1   70.31    1.67 
  -1   4  -1   70.75    1.62 
  -1   4  -1   71.66    1.62 
  -1   4  -1   69.90    1.64 
   1  -4   1   71.28    1.70 
   1  -4   1   75.35    1.56 
   1  -4   1   67.88    1.70 
   1  -4   1   69.76    1.71 
   1  -4   1   73.45    1.65 
   1  -4   1   72.47    1.73 
   1  -4   1   70.77    1.71 
   1  -4   1   68.27    1.63 
  -2   4  -1   10.68    0.44 
  -2   4  -1   10.37    0.45 
  -2   4  -1   10.68    0.44 
  -2   4  -1   11.11    0.50 
  -2   4  -1   11.04    0.44 
  -2   4  -1   11.00    0.45 
  -2   4  -1   11.25    0.48 
   2  -4   1   11.07    0.45 
   2  -4   1   11.13    0.33 
   2  -4   1    9.95    0.45 
   2  -4   1   11.32    0.46 
   2  -4   1   10.61    0.52 
   2  -4   1   10.44    0.50 
   2  -4   1   10.58    0.41 
   2  -4   1   10.52    0.49 
   2  -4   1   10.99    0.44 
  -3   4  -1    3.20    0.33 
  -3   4  -1    2.66    0.29 
  -3   4  -1    3.35    0.33 
  -3   4  -1    2.70    0.28 
  -3   4  -1    2.12    0.26 
  -3   4  -1    2.61    0.30 
  -3   4  -1    2.51    0.30 
  -3   4  -1    2.92    0.28 
   3  -4   1    3.29    0.36 
   3  -4   1    2.94    0.29 
   3  -4   1    2.40    0.32 
   3  -4   1    2.69    0.28 
   3  -4   1    2.57    0.21 
   3  -4   1    3.22    0.31 
   3  -4   1    2.90    0.22 
   3  -4   1    2.37    0.34 
   3  -4   1    2.71    0.33 
  -4   4  -1   50.03    1.32 
  -4   4  -1   50.59    1.34 
  -4   4  -1   50.17    1.42 
  -4   4  -1   52.07    1.31 
  -4   4  -1   49.40    1.35 
  -4   4  -1   50.07    1.38 
  -4   4  -1   50.92    1.33 
   4  -4   1   47.33    1.42 
   4  -4   1   51.11    1.40 
   4  -4   1   50.90    1.40 
   4  -4   1   50.18    1.27 
   4  -4   1   51.51    1.28 
   4  -4   1   53.56    1.37 
   4  -4   1   53.35    1.33 
  -5   4  -1    0.71    0.20 
  -5   4  -1    0.78    0.25 
  -5   4  -1    0.82    0.21 
  -5   4  -1    0.75    0.25 
  -5   4  -1    0.79    0.26 
  -5   4  -1    0.95    0.31 
  -5   4  -1    1.36    0.31 
   5  -4   1    0.75    0.23 
   5  -4   1    0.80    0.20 
   5  -4   1    0.85    0.23 
   5  -4   1    0.92    0.33 
   5  -4   1    0.95    0.28 
   5  -4   1    0.89    0.32 
  -6   4  -1    5.55    0.49 
  -6   4  -1    6.32    0.41 
  -6   4  -1    6.33    0.59 
  -6   4  -1    6.20    0.51 
  -6   4  -1    6.37    0.54 
   6  -4   1    6.91    0.62 
   6  -4   1    6.30    0.47 
   6  -4   1    6.45    0.47 
   6  -4   1    6.53    0.60 
   6  -4   1    6.48    0.55 
   6  -4   1    6.67    0.42 
  -7   4  -1    8.09    0.64 
  -7   4  -1    8.14    0.65 
  -7   4  -1    7.05    0.57 
  -7   4  -1    7.89    0.47 
   7  -4   1    8.55    0.73 
   7  -4   1    8.01    0.55 
   7  -4   1    6.72    0.54 
   7  -4   1    8.62    0.72 
   7  -4   1    7.97    0.60 
   7  -4   1    7.97    0.50 
  -8   4  -1   13.48    0.78 
  -8   4  -1   12.94    0.79 
  -8   4  -1   12.32    0.82 
  -8   4  -1   12.52    0.66 
   8  -4   1   12.32    0.70 
   8  -4   1   13.47    0.74 
   8  -4   1   12.55    0.84 
   8  -4   1   12.04    0.76 
   8  -4   1   12.83    0.84 
   8  -4   1   13.06    0.70 
  -9   4  -1   26.26    1.15 
  -9   4  -1   27.26    1.16 
  -9   4  -1   26.65    1.24 
   9  -4   1   26.57    1.03 
   9  -4   1   25.73    1.19 
   9  -4   1   26.94    1.14 
   9  -4   1   26.99    1.06 
   9  -4   1   25.87    1.20 
 -10   4  -1   28.68    1.26 
 -10   4  -1   28.68    1.36 
 -10   4  -1   26.55    1.23 
  10  -4   1   28.09    1.12 
  10  -4   1   28.08    1.32 
  10  -4   1   27.78    1.27 
  10  -4   1   27.82    1.13 
  10  -4   1   27.48    1.19 
 -11   4  -1    6.97    0.88 
 -11   4  -1    6.93    0.74 
 -11   4  -1    7.57    0.81 
  11  -4   1    6.76    0.76 
  11  -4   1    6.37    0.77 
  11  -4   1    5.15    0.79 
  11  -4   1    6.42    0.66 
  11  -4   1    5.81    0.63 
 -12   4  -1   10.95    0.98 
 -12   4  -1   10.18    1.09 
 -12   4  -1    9.89    0.94 
  12  -4   1   11.34    1.01 
  12  -4   1    8.65    0.78 
  12  -4   1   11.44    1.05 
  12  -4   1   10.71    1.05 
  12  -4   1   10.15    0.83 
 -13   4  -1   21.57    1.43 
 -13   4  -1   23.30    1.32 
 -13   4  -1   24.41    1.34 
 -13   4  -1   25.89    1.42 
  13  -4   1   22.23    1.34 
  13  -4   1   25.40    1.33 
  13  -4   1   22.74    1.43 
  13  -4   1   23.30    1.16 
  13  -4   1   23.08    1.22 
  16   3  -1    0.18    0.61 
  16   3  -1    0.65    0.67 
  16   3  -1    1.63    0.55 
  16   3  -1    2.06    0.62 
 -16  -3   1    1.84    0.77 
 -16  -3   1    1.21    0.64 
  15   3  -1    0.42    0.57 
  15   3  -1    0.83    0.54 
  15   3  -1   -0.39    0.46 
  15   3  -1    0.42    0.56 
  15   3  -1    0.68    0.65 
 -15  -3   1    0.45    0.70 
 -15  -3   1    0.80    0.67 
 -15  -3   1    0.45    0.69 
 -15  -3   1    0.30    0.57 
  14   3  -1    1.03    0.49 
  14   3  -1    2.07    0.60 
  14   3  -1    2.42    0.54 
  14   3  -1    1.11    0.62 
  14   3  -1    2.29    0.65 
 -14  -3   1    0.89    0.55 
 -14  -3   1    2.33    0.72 
 -14  -3   1    1.59    0.58 
 -14  -3   1    2.35    0.62 
  13   3  -1    0.99    0.50 
  13   3  -1    1.28    0.52 
  13   3  -1    1.48    0.46 
  13   3  -1    1.46    0.47 
  13   3  -1    1.04    0.53 
 -13  -3   1    1.32    0.52 
 -13  -3   1    2.30    0.57 
 -13  -3   1    1.42    0.64 
 -13  -3   1    2.35    0.60 
  12   3  -1    5.05    0.64 
  12   3  -1    4.15    0.70 
  12   3  -1    3.80    0.55 
  12   3  -1    5.09    0.58 
  12   3  -1    4.31    0.70 
 -12  -3   1    5.73    0.68 
 -12  -3   1    4.63    0.64 
 -12  -3   1    5.84    0.75 
 -12  -3   1    5.00    0.66 
  11   3  -1   13.98    0.94 
  11   3  -1   15.54    0.98 
  11   3  -1   15.45    0.91 
  11   3  -1   16.81    0.87 
  11   3  -1   15.52    0.82 
 -11  -3   1   14.41    0.90 
 -11  -3   1   16.61    0.98 
 -11  -3   1   16.39    0.92 
 -11  -3   1   15.74    0.92 
 -11  -3   1   16.40    0.93 
  10   3  -1   61.12    2.01 
  10   3  -1   62.37    1.67 
  10   3  -1   63.54    1.86 
  10   3  -1   64.06    1.95 
  10   3  -1   65.11    1.81 
  10   3  -1   63.14    1.73 
 -10  -3   1   64.39    1.86 
 -10  -3   1   63.60    1.88 
 -10  -3   1   64.35    1.95 
 -10  -3   1   63.36    1.85 
 -10  -3   1   65.12    1.91 
   9   3  -1   99.43    2.44 
   9   3  -1   98.40    2.37 
   9   3  -1  100.07    2.50 
   9   3  -1   94.72    2.69 
   9   3  -1   97.55    2.34 
   9   3  -1   99.72    2.61 
  -9  -3   1   97.32    2.55 
  -9  -3   1   99.14    2.57 
  -9  -3   1   97.07    2.60 
  -9  -3   1   98.08    2.48 
  -9  -3   1   98.74    2.52 
   8   3  -1    6.54    0.54 
   8   3  -1    6.00    0.57 
   8   3  -1    6.02    0.39 
   8   3  -1    5.89    0.45 
   8   3  -1    5.78    0.46 
   8   3  -1    6.94    0.64 
  -8  -3   1    6.21    0.48 
  -8  -3   1    7.39    0.59 
  -8  -3   1    7.24    0.57 
  -8  -3   1    5.80    0.51 
  -8  -3   1    6.29    0.53 
  -8  -3   1    6.64    0.59 
  -8  -3   1    6.59    0.54 
   7   3  -1    0.05    0.19 
   7   3  -1    0.12    0.24 
   7   3  -1   -0.18    0.17 
   7   3  -1    0.03    0.08 
   7   3  -1   -0.11    0.27 
   7   3  -1    0.04    0.22 
   7   3  -1   -0.13    0.14 
   7   3  -1   -0.23    0.22 
  -7  -3   1   -0.13    0.21 
  -7  -3   1   -0.19    0.20 
  -7  -3   1    0.25    0.25 
  -7  -3   1   -0.38    0.22 
  -7  -3   1   -0.05    0.25 
  -7  -3   1   -0.26    0.18 
  -7  -3   1    0.11    0.24 
   6   3  -1    7.50    0.35 
   6   3  -1    7.52    0.41 
   6   3  -1    7.50    0.42 
   6   3  -1    8.35    0.44 
   6   3  -1    7.29    0.49 
   6   3  -1    7.52    0.49 
   6   3  -1    7.63    0.28 
   6   3  -1    6.92    0.49 
  -6  -3   1    6.53    0.43 
  -6  -3   1    7.61    0.46 
  -6  -3   1    7.19    0.47 
  -6  -3   1    7.12    0.44 
  -6  -3   1    6.91    0.46 
  -6  -3   1    7.41    0.46 
  -6  -3   1    8.36    0.52 
   5   3  -1  203.91    3.89 
   5   3  -1  199.71    4.51 
   5   3  -1  188.55    4.14 
   5   3  -1  195.78    4.33 
   5   3  -1  196.99    4.34 
   5   3  -1  194.66    4.20 
   5   3  -1  188.57    4.08 
   5   3  -1  196.05    4.19 
  -5  -3   1  196.01    4.13 
  -5  -3   1  191.60    4.17 
  -5  -3   1  195.24    4.36 
  -5  -3   1  204.69    4.51 
  -5  -3   1  196.10    4.21 
  -5  -3   1  188.62    4.33 
  -5  -3   1  191.44    4.23 
   4   3  -1  626.69   13.06 
   4   3  -1  612.13   12.85 
   4   3  -1  640.38   11.95 
   4   3  -1  612.14   12.57 
   4   3  -1  614.14   12.53 
   4   3  -1  627.57   13.37 
   4   3  -1  607.70   12.73 
   4   3  -1  601.98   12.34 
  -4  -3   1  633.54   13.39 
  -4  -3   1  604.75   12.55 
  -4  -3   1  608.86   12.54 
  -4  -3   1  616.12   13.05 
  -4  -3   1  625.89   13.09 
  -4  -3   1  620.61   12.38 
  -4  -3   1  621.27   12.74 
   3   3  -1   92.73    1.99 
   3   3  -1   89.28    1.96 
   3   3  -1   92.15    2.16 
   3   3  -1   90.65    2.09 
   3   3  -1   93.31    1.91 
   3   3  -1   89.48    2.08 
   3   3  -1   90.58    2.03 
   3   3  -1   86.78    1.96 
  -3  -3   1   89.70    2.03 
  -3  -3   1   86.49    1.98 
  -3  -3   1   91.85    2.07 
  -3  -3   1   91.35    1.98 
  -3  -3   1   90.82    2.07 
  -3  -3   1   90.65    2.02 
  -3  -3   1   92.24    2.22 
   2   3  -1   43.30    1.00 
   2   3  -1   45.31    1.12 
   2   3  -1   44.22    1.10 
   2   3  -1   43.59    1.03 
   2   3  -1   43.24    1.10 
   2   3  -1   44.38    1.07 
   2   3  -1   45.18    1.04 
  -2  -3   1   43.92    1.04 
  -2  -3   1   45.54    1.08 
  -2  -3   1   45.15    1.19 
  -2  -3   1   43.17    1.07 
  -2  -3   1   43.85    1.06 
  -2  -3   1   44.41    1.08 
  -2  -3   1   44.51    1.05 
   1   3  -1   41.43    1.03 
   1   3  -1   40.86    0.94 
   1   3  -1   42.19    1.01 
   1   3  -1   42.44    1.01 
   1   3  -1   42.27    0.98 
   1   3  -1   43.14    1.01 
  -1  -3   1   43.25    1.12 
  -1  -3   1   41.91    1.02 
  -1  -3   1   40.78    1.01 
  -1  -3   1   41.60    1.01 
  -1  -3   1   41.25    1.00 
  -1  -3   1   42.59    1.05 
  -1  -3   1   42.85    1.06 
   0   3  -1   14.13    0.48 
   0   3  -1   14.42    0.45 
   0   3  -1   14.13    0.50 
   0   3  -1   13.96    0.44 
   0   3  -1   14.52    0.45 
   0   3  -1   14.49    0.43 
   0   3  -1   13.80    0.37 
   0  -3   1   14.46    0.47 
   0  -3   1   14.23    0.48 
   0  -3   1   14.18    0.46 
   0  -3   1   14.43    0.49 
   0  -3   1   13.87    0.50 
   0  -3   1   14.36    0.49 
   0  -3   1   15.56    0.52 
   0  -3   1   14.57    0.47 
  -1   3  -1   96.21    2.17 
  -1   3  -1   96.68    2.22 
  -1   3  -1   96.60    2.09 
  -1   3  -1   91.48    2.10 
  -1   3  -1   97.81    2.09 
  -1   3  -1   99.80    2.09 
   1  -3   1   99.23    2.10 
   1  -3   1   95.23    2.11 
   1  -3   1   99.44    2.21 
   1  -3   1   95.67    2.21 
   1  -3   1   99.38    2.19 
   1  -3   1   98.35    2.22 
  -2   3  -1   91.20    2.15 
  -2   3  -1   92.95    2.07 
  -2   3  -1   94.41    2.05 
  -2   3  -1   92.07    2.07 
  -2   3  -1   92.01    2.18 
  -2   3  -1   91.94    2.13 
  -2   3  -1   95.23    2.05 
   2  -3   1   94.74    2.08 
   2  -3   1   95.27    2.07 
   2  -3   1   93.90    2.15 
   2  -3   1   94.68    2.05 
   2  -3   1   96.48    2.17 
   2  -3   1   98.70    2.15 
   2  -3   1   92.35    2.18 
   2  -3   1   91.67    2.19 
   2  -3   1   94.58    2.11 
  -3   3  -1  159.23    3.41 
  -3   3  -1  159.37    3.43 
  -3   3  -1  155.78    3.62 
  -3   3  -1  158.01    3.53 
  -3   3  -1  162.39    3.34 
  -3   3  -1  156.36    3.55 
  -3   3  -1  160.94    3.46 
   3  -3   1  160.82    3.54 
   3  -3   1  163.42    3.47 
   3  -3   1  166.73    3.56 
   3  -3   1  158.82    3.64 
   3  -3   1  158.74    3.59 
   3  -3   1  160.12    3.54 
   3  -3   1  167.07    3.56 
   3  -3   1  163.84    3.43 
   3  -3   1  160.31    3.37 
  -4   3  -1   33.33    0.90 
  -4   3  -1   32.91    0.92 
  -4   3  -1   32.57    0.95 
  -4   3  -1   33.27    1.02 
  -4   3  -1   31.91    0.94 
  -4   3  -1   32.19    0.92 
   4  -3   1   33.23    0.91 
   4  -3   1   33.64    0.94 
   4  -3   1   33.22    1.00 
   4  -3   1   32.72    1.02 
   4  -3   1   33.05    0.89 
   4  -3   1   33.10    0.91 
   4  -3   1   36.04    0.98 
   4  -3   1   33.80    0.99 
  -5   3  -1    1.05    0.29 
  -5   3  -1    0.92    0.26 
  -5   3  -1    0.80    0.18 
  -5   3  -1    0.67    0.20 
  -5   3  -1    0.78    0.21 
  -5   3  -1    0.66    0.23 
   5  -3   1    0.51    0.19 
   5  -3   1    0.78    0.20 
   5  -3   1    0.38    0.24 
   5  -3   1    0.82    0.27 
   5  -3   1    0.55    0.27 
   5  -3   1    0.51    0.20 
   5  -3   1    0.53    0.19 
  -6   3  -1   33.78    1.09 
  -6   3  -1   34.56    1.05 
  -6   3  -1   34.75    1.18 
  -6   3  -1   36.20    0.97 
  -6   3  -1   35.07    1.10 
   6  -3   1   34.08    1.13 
   6  -3   1   34.54    1.14 
   6  -3   1   34.53    1.06 
   6  -3   1   35.63    1.12 
   6  -3   1   33.80    1.00 
   6  -3   1   36.20    1.04 
  -7   3  -1   17.89    0.87 
  -7   3  -1   18.42    0.81 
  -7   3  -1   17.52    0.63 
  -7   3  -1   17.17    0.78 
   7  -3   1   17.52    0.83 
   7  -3   1   17.76    0.86 
   7  -3   1   17.67    0.72 
   7  -3   1   18.40    0.74 
   7  -3   1   18.49    0.75 
   7  -3   1   19.77    0.84 
  -8   3  -1   63.16    1.84 
  -8   3  -1   64.09    1.98 
  -8   3  -1   64.77    1.84 
   8  -3   1   66.55    1.72 
   8  -3   1   60.79    1.87 
   8  -3   1   65.18    1.73 
   8  -3   1   66.60    1.90 
   8  -3   1   65.58    1.82 
   8  -3   1   66.26    1.86 
  -9   3  -1   58.61    1.78 
  -9   3  -1   58.63    1.80 
  -9   3  -1   58.09    1.92 
   9  -3   1   59.10    1.66 
   9  -3   1   60.16    1.77 
   9  -3   1   57.70    1.83 
   9  -3   1   59.35    1.65 
   9  -3   1   58.50    1.78 
   9  -3   1   57.31    1.81 
 -10   3  -1   20.05    1.13 
 -10   3  -1   20.19    1.04 
 -10   3  -1   18.70    1.01 
  10  -3   1   19.97    1.01 
  10  -3   1   19.74    0.90 
  10  -3   1   18.92    1.06 
  10  -3   1   19.01    0.91 
  10  -3   1   19.78    1.05 
 -11   3  -1   20.11    1.13 
 -11   3  -1   22.79    1.14 
 -11   3  -1   21.70    1.25 
  11  -3   1   22.17    1.21 
  11  -3   1   21.48    0.98 
  11  -3   1   23.13    1.03 
  11  -3   1   22.08    1.12 
  11  -3   1   21.52    1.13 
 -12   3  -1    9.48    0.88 
 -12   3  -1   10.40    0.94 
 -12   3  -1   11.62    1.10 
  12  -3   1   10.46    0.82 
  12  -3   1   10.37    0.81 
  12  -3   1   10.85    0.96 
  12  -3   1   10.00    1.00 
  12  -3   1   12.94    0.97 
 -13   3  -1   28.77    1.48 
 -13   3  -1   29.78    1.60 
 -13   3  -1   29.81    1.43 
  13  -3   1   29.67    1.46 
  13  -3   1   25.60    1.47 
  13  -3   1   29.09    1.30 
  13  -3   1   28.36    1.25 
  13  -3   1   27.27    1.36 
 -14   3  -1   33.45    1.59 
 -14   3  -1   32.54    1.65 
 -14   3  -1   31.83    1.70 
  14  -3   1   32.27    1.59 
  14  -3   1   32.40    1.38 
  14  -3   1   30.55    1.63 
  14  -3   1   34.11    1.44 
  14  -3   1   32.68    1.54 
  15   2  -1    1.47    0.54 
  15   2  -1    1.48    0.70 
  15   2  -1    1.69    0.63 
  15   2  -1    0.57    0.59 
  15   2  -1    2.22    0.60 
 -15  -2   1    1.57    0.78 
 -15  -2   1    1.29    0.69 
 -15  -2   1    0.94    0.60 
  14   2  -1    0.54    0.45 
  14   2  -1    0.44    0.54 
  14   2  -1    0.46    0.52 
  14   2  -1   -0.38    0.50 
  14   2  -1    0.00    0.45 
 -14  -2   1    1.02    0.57 
 -14  -2   1    0.39    0.51 
 -14  -2   1    0.82    0.68 
 -14  -2   1    1.39    0.60 
  13   2  -1    0.46    0.42 
  13   2  -1    1.08    0.51 
  13   2  -1    0.82    0.51 
  13   2  -1    1.08    0.48 
  13   2  -1    0.61    0.50 
 -13  -2   1    0.91    0.51 
 -13  -2   1    0.46    0.58 
 -13  -2   1    0.29    0.50 
  12   2  -1   27.61    1.32 
  12   2  -1   26.21    1.26 
  12   2  -1   28.41    1.20 
  12   2  -1   27.55    1.19 
  12   2  -1   28.52    1.14 
 -12  -2   1   26.31    1.32 
 -12  -2   1   29.35    1.28 
 -12  -2   1   27.50    1.25 
  11   2  -1   50.66    1.60 
  11   2  -1   48.19    1.48 
  11   2  -1   50.33    1.63 
  11   2  -1   51.15    1.72 
  11   2  -1   49.37    1.51 
  11   2  -1   47.53    1.76 
 -11  -2   1   46.25    1.60 
 -11  -2   1   48.09    1.72 
 -11  -2   1   50.43    1.67 
  10   2  -1   41.06    1.34 
  10   2  -1   40.27    1.26 
  10   2  -1   40.42    1.37 
  10   2  -1   40.11    1.44 
  10   2  -1   40.82    1.28 
  10   2  -1   40.95    1.50 
 -10  -2   1   40.44    1.49 
 -10  -2   1   40.27    1.38 
 -10  -2   1   40.85    1.42 
 -10  -2   1   41.64    1.31 
   9   2  -1    8.44    0.64 
   9   2  -1    8.83    0.69 
   9   2  -1   10.32    0.60 
   9   2  -1    9.31    0.52 
   9   2  -1    9.00    0.60 
   9   2  -1    9.47    0.68 
  -9  -2   1    9.32    0.64 
  -9  -2   1    9.64    0.68 
  -9  -2   1    9.04    0.69 
  -9  -2   1    9.37    0.57 
   8   2  -1    1.85    0.40 
   8   2  -1    1.65    0.37 
   8   2  -1    1.90    0.34 
   8   2  -1    2.24    0.38 
   8   2  -1    2.37    0.29 
   8   2  -1    2.21    0.32 
  -8  -2   1    2.13    0.35 
  -8  -2   1    1.86    0.37 
  -8  -2   1    1.62    0.35 
  -8  -2   1    2.23    0.41 
  -8  -2   1    2.39    0.34 
  -8  -2   1    2.61    0.37 
   7   2  -1    2.66    0.32 
   7   2  -1    2.58    0.41 
   7   2  -1    2.94    0.30 
   7   2  -1    2.28    0.30 
   7   2  -1    2.08    0.33 
   7   2  -1    2.77    0.34 
   7   2  -1    2.48    0.39 
  -7  -2   1    2.53    0.36 
  -7  -2   1    2.75    0.36 
  -7  -2   1    1.93    0.35 
  -7  -2   1    2.53    0.35 
  -7  -2   1    2.92    0.37 
  -7  -2   1    3.09    0.35 
   6   2  -1  130.00    2.98 
   6   2  -1  123.21    2.83 
   6   2  -1  133.24    2.54 
   6   2  -1  127.16    3.12 
   6   2  -1  129.96    2.88 
   6   2  -1  128.26    2.99 
   6   2  -1  131.61    2.90 
   6   2  -1  124.92    2.79 
  -6  -2   1  125.38    2.97 
  -6  -2   1  124.27    2.88 
  -6  -2   1  131.86    3.05 
  -6  -2   1  126.56    2.90 
  -6  -2   1  126.30    3.02 
  -6  -2   1  125.00    2.84 
   5   2  -1  385.12    8.25 
   5   2  -1  396.62    8.02 
   5   2  -1  398.98    8.25 
   5   2  -1  395.60    8.37 
   5   2  -1  399.42    8.73 
   5   2  -1  410.18    7.65 
   5   2  -1  399.70    8.49 
   5   2  -1  396.83    8.16 
  -5  -2   1  393.97    8.29 
  -5  -2   1  396.80    8.06 
  -5  -2   1  384.55    8.47 
  -5  -2   1  403.99    8.67 
  -5  -2   1  391.49    8.17 
  -5  -2   1  384.35    8.15 
  -5  -2   1  398.09    8.54 
   4   2  -1    4.41    0.30 
   4   2  -1    4.71    0.34 
   4   2  -1    4.32    0.24 
   4   2  -1    4.66    0.29 
   4   2  -1    4.60    0.21 
   4   2  -1    4.80    0.34 
   4   2  -1    4.43    0.35 
   4   2  -1    5.14    0.29 
  -4  -2   1    4.65    0.33 
  -4  -2   1    4.96    0.35 
  -4  -2   1    5.08    0.32 
  -4  -2   1    4.41    0.30 
  -4  -2   1    4.57    0.29 
  -4  -2   1    4.45    0.32 
  -4  -2   1    4.62    0.31 
   3   2  -1   34.18    0.94 
   3   2  -1   33.42    0.89 
   3   2  -1   35.12    0.78 
   3   2  -1   32.77    0.87 
   3   2  -1   34.18    0.91 
   3   2  -1   33.65    0.83 
   3   2  -1   32.23    0.80 
  -3  -2   1   35.32    0.86 
  -3  -2   1   33.87    0.89 
  -3  -2   1   32.77    0.88 
  -3  -2   1   34.06    0.88 
  -3  -2   1   34.30    0.96 
  -3  -2   1   34.61    0.86 
  -3  -2   1   32.64    0.84 
   2   2  -1  410.88    8.70 
   2   2  -1  411.25    8.49 
   2   2  -1  413.71    8.50 
   2   2  -1  433.54    9.05 
   2   2  -1  415.88    8.37 
   2   2  -1  417.33    8.86 
   2   2  -1  433.39    8.14 
  -2  -2   1  422.63    8.87 
  -2  -2   1  421.36    8.63 
  -2  -2   1  406.14    8.67 
  -2  -2   1  421.13    8.84 
  -2  -2   1  421.16    8.50 
  -2  -2   1  419.25    8.39 
  -2  -2   1  437.90    9.09 
   1   2  -1    0.38    0.10 
   1   2  -1    0.39    0.11 
   1   2  -1    0.31    0.11 
   1   2  -1    0.51    0.12 
   1   2  -1    0.56    0.12 
   1   2  -1    0.29    0.08 
   1   2  -1    0.38    0.10 
  -1  -2   1    0.32    0.11 
  -1  -2   1    0.45    0.12 
  -1  -2   1    0.36    0.12 
  -1  -2   1    0.38    0.12 
  -1  -2   1    0.41    0.12 
  -1  -2   1    0.39    0.14 
  -1  -2   1    0.33    0.12 
   0   2  -1   47.34    1.01 
   0   2  -1   44.32    1.05 
   0   2  -1   46.87    1.00 
   0   2  -1   45.04    1.00 
   0   2  -1   47.71    1.03 
   0   2  -1   45.99    1.03 
   0   2  -1   45.05    1.09 
   0  -2   1   47.35    1.06 
   0  -2   1   47.24    1.11 
   0  -2   1   45.90    1.03 
   0  -2   1   44.51    1.02 
   0  -2   1   43.19    1.10 
   0  -2   1   44.49    1.06 
   0  -2   1   45.88    1.03 
   0  -2   1   42.07    1.08 
  -1   2  -1   65.28    1.55 
  -1   2  -1   69.53    1.50 
  -1   2  -1   67.44    1.51 
  -1   2  -1   70.40    1.50 
  -1   2  -1   70.18    1.51 
   1  -2   1   69.32    1.51 
   1  -2   1   71.28    1.60 
   1  -2   1   69.28    1.57 
   1  -2   1   72.79    1.57 
   1  -2   1   68.13    1.60 
   1  -2   1   68.65    1.50 
   1  -2   1   68.41    1.51 
   1  -2   1   69.12    1.60 
   1  -2   1   70.81    1.58 
   1  -2   1   69.68    1.49 
  -2   2  -1   22.58    0.63 
  -2   2  -1   23.44    0.68 
  -2   2  -1   22.49    0.66 
  -2   2  -1   23.63    0.63 
  -2   2  -1   24.92    0.65 
  -2   2  -1   23.87    0.64 
  -2   2  -1   23.13    0.62 
   2  -2   1   23.65    0.60 
   2  -2   1   24.62    0.64 
   2  -2   1   24.73    0.58 
   2  -2   1   23.48    0.70 
   2  -2   1   23.53    0.62 
   2  -2   1   23.91    0.68 
   2  -2   1   23.95    0.70 
   2  -2   1   23.43    0.68 
   2  -2   1   23.89    0.62 
   2  -2   1   23.70    0.63 
   2  -2   1   23.51    0.67 
  -3   2  -1  156.13    3.38 
  -3   2  -1  161.17    3.32 
  -3   2  -1  159.84    3.22 
  -3   2  -1  152.65    3.46 
  -3   2  -1  154.50    3.54 
  -3   2  -1  157.18    3.33 
   3  -2   1  152.96    3.48 
   3  -2   1  159.98    3.45 
   3  -2   1  158.65    3.46 
   3  -2   1  158.92    3.50 
   3  -2   1  162.51    3.33 
   3  -2   1  160.60    3.45 
   3  -2   1  156.64    3.27 
   3  -2   1  163.20    3.30 
   3  -2   1  157.68    3.41 
  -4   2  -1   -0.03    0.20 
  -4   2  -1    0.04    0.16 
  -4   2  -1    0.14    0.13 
  -4   2  -1    0.12    0.19 
  -4   2  -1   -0.17    0.12 
  -4   2  -1    0.06    0.14 
   4  -2   1   -0.07    0.14 
   4  -2   1   -0.09    0.14 
   4  -2   1    0.10    0.16 
   4  -2   1    0.15    0.20 
   4  -2   1   -0.04    0.21 
   4  -2   1    0.06    0.14 
   4  -2   1   -0.11    0.18 
   4  -2   1   -0.24    0.15 
  -5   2  -1    4.88    0.33 
  -5   2  -1    5.02    0.29 
  -5   2  -1    4.90    0.33 
  -5   2  -1    4.45    0.42 
  -5   2  -1    4.69    0.37 
  -5   2  -1    5.04    0.40 
   5  -2   1    4.78    0.34 
   5  -2   1    4.96    0.40 
   5  -2   1    5.50    0.34 
   5  -2   1    4.95    0.40 
   5  -2   1    5.22    0.42 
   5  -2   1    5.13    0.35 
   5  -2   1    4.36    0.32 
  -6   2  -1   23.22    0.68 
  -6   2  -1   22.24    0.89 
  -6   2  -1   23.24    0.78 
  -6   2  -1   23.37    0.82 
  -6   2  -1   23.10    0.77 
  -6   2  -1   24.23    0.85 
   6  -2   1   23.70    0.75 
   6  -2   1   23.18    0.86 
   6  -2   1   23.20    0.85 
   6  -2   1   23.38    0.77 
   6  -2   1   22.20    0.85 
   6  -2   1   24.52    0.83 
   6  -2   1   23.78    0.78 
  -7   2  -1   24.98    0.92 
  -7   2  -1   24.43    0.99 
  -7   2  -1   24.74    0.71 
  -7   2  -1   24.18    0.90 
   7  -2   1   23.04    0.83 
   7  -2   1   24.83    0.83 
   7  -2   1   24.20    0.89 
   7  -2   1   24.35    0.93 
   7  -2   1   24.41    0.94 
   7  -2   1   24.19    0.93 
  -8   2  -1   60.74    1.75 
  -8   2  -1   63.85    1.92 
  -8   2  -1   61.38    1.77 
   8  -2   1   63.33    1.79 
   8  -2   1   64.09    1.65 
   8  -2   1   63.51    1.67 
   8  -2   1   60.87    1.77 
   8  -2   1   62.87    1.81 
   8  -2   1   62.56    1.78 
  -9   2  -1   35.20    1.36 
  -9   2  -1   33.98    1.25 
  -9   2  -1   35.17    1.26 
   9  -2   1   34.07    1.29 
   9  -2   1   33.47    1.14 
   9  -2   1   33.47    1.24 
   9  -2   1   35.04    1.14 
   9  -2   1   34.62    1.25 
   9  -2   1   35.44    1.25 
 -10   2  -1    2.59    0.49 
 -10   2  -1    2.49    0.57 
 -10   2  -1    3.23    0.56 
  10  -2   1    3.55    0.50 
  10  -2   1    3.44    0.60 
  10  -2   1    3.44    0.55 
  10  -2   1    3.25    0.47 
  10  -2   1    2.98    0.45 
  10  -2   1    2.52    0.51 
 -11   2  -1   20.36    1.09 
 -11   2  -1   20.58    1.09 
 -11   2  -1   20.37    1.17 
  11  -2   1   19.95    1.13 
  11  -2   1   22.36    1.05 
  11  -2   1   20.61    0.96 
  11  -2   1   20.97    1.06 
  11  -2   1   21.05    0.97 
  11  -2   1   20.73    1.07 
 -12   2  -1    7.01    0.77 
 -12   2  -1    6.60    0.85 
 -12   2  -1    6.42    0.76 
  12  -2   1    7.23    0.80 
  12  -2   1    6.33    0.64 
  12  -2   1    6.00    0.82 
  12  -2   1    7.45    0.71 
  12  -2   1    5.90    0.72 
 -13   2  -1   27.38    1.35 
 -13   2  -1   24.45    1.45 
 -13   2  -1   27.08    1.39 
  13  -2   1   25.68    1.38 
  13  -2   1   26.97    1.32 
  13  -2   1   27.17    1.33 
  13  -2   1   26.94    1.19 
  13  -2   1   26.44    1.23 
 -14   2  -1   28.48    1.47 
 -14   2  -1   29.31    1.52 
 -14   2  -1   26.76    1.53 
  14  -2   1   29.98    1.30 
  14  -2   1   30.44    1.34 
  14  -2   1   27.17    1.52 
  14  -2   1   29.09    1.44 
  15   1  -1    3.76    0.67 
  15   1  -1    2.91    0.73 
  15   1  -1    1.22    0.63 
  15   1  -1    2.15    0.58 
  15   1  -1    1.73    0.65 
 -15  -1   1    2.47    0.80 
 -15  -1   1    2.50    0.69 
  14   1  -1    0.91    0.46 
  14   1  -1    0.19    0.55 
  14   1  -1    1.14    0.57 
  14   1  -1    0.99    0.60 
  14   1  -1    0.87    0.50 
 -14  -1   1    1.00    0.58 
 -14  -1   1    0.41    0.67 
 -14  -1   1    1.02    0.52 
  13   1  -1    3.12    0.58 
  13   1  -1    3.86    0.69 
  13   1  -1    3.35    0.64 
  13   1  -1    3.22    0.58 
  13   1  -1    3.35    0.66 
 -13  -1   1    2.98    0.62 
 -13  -1   1    2.10    0.68 
 -13  -1   1    3.57    0.65 
  12   1  -1   80.42    2.24 
  12   1  -1   77.05    2.14 
  12   1  -1   76.19    2.24 
  12   1  -1   75.37    2.31 
  12   1  -1   74.72    2.42 
 -12  -1   1   74.60    2.27 
 -12  -1   1   75.59    2.44 
 -12  -1   1   82.44    2.38 
  11   1  -1  109.06    2.83 
  11   1  -1  111.06    2.97 
  11   1  -1  108.48    3.09 
  11   1  -1  109.93    2.74 
  11   1  -1  115.60    2.90 
 -11  -1   1  114.06    3.10 
 -11  -1   1  111.22    2.99 
 -11  -1   1  109.01    2.88 
  10   1  -1   44.48    1.57 
  10   1  -1   43.13    1.34 
  10   1  -1   43.85    1.41 
  10   1  -1   42.10    1.48 
  10   1  -1   41.92    1.41 
 -10  -1   1   44.39    1.56 
 -10  -1   1   41.10    1.46 
 -10  -1   1   42.99    1.44 
   9   1  -1   10.65    0.70 
   9   1  -1   10.57    0.71 
   9   1  -1   10.65    0.65 
   9   1  -1   10.70    0.63 
   9   1  -1   10.74    0.69 
  -9  -1   1   10.33    0.67 
  -9  -1   1   10.54    0.74 
  -9  -1   1   11.52    0.74 
  -9  -1   1   10.98    0.56 
   8   1  -1    0.71    0.32 
   8   1  -1    0.22    0.25 
   8   1  -1    0.49    0.33 
   8   1  -1    0.37    0.28 
   8   1  -1    0.63    0.30 
  -8  -1   1    0.91    0.26 
  -8  -1   1    0.70    0.25 
  -8  -1   1    0.19    0.27 
  -8  -1   1    0.34    0.32 
  -8  -1   1    0.16    0.24 
  -8  -1   1    0.37    0.30 
   7   1  -1  117.41    2.96 
   7   1  -1  118.37    2.74 
   7   1  -1  118.65    2.75 
   7   1  -1  117.15    2.83 
   7   1  -1  122.70    2.82 
   7   1  -1  117.36    2.65 
  -7  -1   1  120.66    2.81 
  -7  -1   1  117.13    2.83 
  -7  -1   1  116.09    2.75 
  -7  -1   1  118.76    2.90 
  -7  -1   1  111.30    2.72 
  -7  -1   1  116.95    2.70 
   6   1  -1  192.84    4.27 
   6   1  -1  197.17    4.15 
   6   1  -1  200.59    4.40 
   6   1  -1  193.40    4.56 
   6   1  -1  195.45    4.36 
   6   1  -1  196.19    4.25 
   6   1  -1  204.61    3.83 
  -6  -1   1  194.97    4.46 
  -6  -1   1  197.03    4.20 
  -6  -1   1  191.07    4.24 
  -6  -1   1  195.18    4.43 
  -6  -1   1  191.77    4.25 
  -6  -1   1  199.21    3.83 
  -6  -1   1  197.32    4.41 
   5   1  -1   96.88    2.29 
   5   1  -1   95.93    2.16 
   5   1  -1  101.63    2.24 
   5   1  -1   97.99    2.22 
   5   1  -1   99.61    2.30 
   5   1  -1   98.19    2.41 
  -5  -1   1   96.03    1.94 
  -5  -1   1   95.88    2.29 
  -5  -1   1   97.81    2.19 
  -5  -1   1   97.88    2.31 
  -5  -1   1   96.57    2.22 
  -5  -1   1   96.71    2.23 
  -5  -1   1   96.21    2.34 
   4   1  -1   73.22    1.76 
   4   1  -1   72.74    1.65 
   4   1  -1   75.51    1.50 
   4   1  -1   74.45    1.85 
   4   1  -1   76.02    1.72 
   4   1  -1   74.54    1.76 
   4   1  -1   73.01    1.69 
  -4  -1   1   75.03    1.72 
  -4  -1   1   76.05    1.80 
  -4  -1   1   73.85    1.79 
  -4  -1   1   70.63    1.69 
  -4  -1   1   75.14    1.50 
  -4  -1   1   75.85    1.69 
  -4  -1   1   72.82    1.76 
   3   1  -1   21.27    0.49 
   3   1  -1   21.33    0.66 
   3   1  -1   20.29    0.62 
   3   1  -1   20.41    0.61 
   3   1  -1   21.06    0.61 
   3   1  -1   21.12    0.57 
   3   1  -1   21.10    0.57 
  -3  -1   1   20.92    0.58 
  -3  -1   1   20.38    0.61 
  -3  -1   1   21.41    0.49 
  -3  -1   1   21.52    0.64 
  -3  -1   1   20.83    0.59 
  -3  -1   1   20.47    0.62 
  -3  -1   1   21.02    0.61 
   2   1  -1   56.07    1.17 
   2   1  -1   55.46    1.31 
   2   1  -1   55.81    1.30 
   2   1  -1   57.22    1.28 
   2   1  -1   59.14    1.37 
   2   1  -1   56.75    1.24 
   2   1  -1   58.22    1.24 
  -2  -1   1   56.85    1.17 
  -2  -1   1   56.29    1.26 
  -2  -1   1   56.77    1.28 
  -2  -1   1   59.10    1.37 
  -2  -1   1   57.16    1.31 
  -2  -1   1   53.43    1.24 
  -2  -1   1   58.58    1.32 
   1   1  -1    0.89    0.10 
   1   1  -1    0.82    0.09 
   1   1  -1    0.86    0.07 
   1   1  -1    0.66    0.10 
   1   1  -1    0.86    0.10 
   1   1  -1    1.02    0.11 
   1   1  -1    1.03    0.10 
  -1  -1   1    0.84    0.10 
  -1  -1   1    1.08    0.11 
  -1  -1   1    1.07    0.14 
  -1  -1   1    0.92    0.11 
  -1  -1   1    0.73    0.10 
  -1  -1   1    0.85    0.08 
  -1  -1   1    0.80    0.06 
  -1  -1   1    0.94    0.10 
   0   1  -1   33.06    0.75 
   0   1  -1   33.37    0.70 
   0   1  -1   33.50    0.72 
   0   1  -1   34.57    0.73 
   0   1  -1   34.54    0.74 
   0   1  -1   32.77    0.73 
   0   1  -1   29.97    0.77 
   0  -1   1   33.15    0.77 
   0  -1   1   32.61    0.79 
   0  -1   1   34.58    0.73 
   0  -1   1   34.76    0.75 
   0  -1   1   32.63    0.73 
   0  -1   1   33.83    0.80 
   0  -1   1   33.84    0.72 
   0  -1   1   29.40    0.76 
   0  -1   1   34.03    0.73 
  -1   1  -1  198.63    4.07 
  -1   1  -1  192.63    4.23 
  -1   1  -1  199.93    4.02 
  -1   1  -1  200.43    4.23 
  -1   1  -1  195.37    4.09 
  -1   1  -1  204.46    3.94 
  -1   1  -1  191.41    4.18 
   1  -1   1  198.38    4.28 
   1  -1   1  202.35    4.02 
   1  -1   1  192.19    4.06 
   1  -1   1  201.73    4.02 
   1  -1   1  200.17    4.17 
   1  -1   1  203.94    4.19 
   1  -1   1  198.74    4.29 
   1  -1   1  213.25    4.26 
   1  -1   1  202.21    4.29 
   1  -1   1  199.29    4.22 
   1  -1   1  204.88    4.06 
  -2   1  -1   -0.12    0.11 
  -2   1  -1   -0.09    0.09 
  -2   1  -1   -0.11    0.10 
  -2   1  -1   -0.19    0.09 
  -2   1  -1   -0.20    0.08 
  -2   1  -1   -0.22    0.09 
  -2   1  -1   -0.12    0.13 
  -2   1  -1   -0.13    0.12 
   2  -1   1   -0.08    0.13 
   2  -1   1   -0.18    0.13 
   2  -1   1   -0.08    0.10 
   2  -1   1   -0.19    0.10 
   2  -1   1   -0.21    0.09 
   2  -1   1   -0.03    0.10 
   2  -1   1   -0.12    0.14 
   2  -1   1   -0.25    0.08 
   2  -1   1   -0.26    0.13 
  -3   1  -1   29.87    0.78 
  -3   1  -1   29.17    0.84 
  -3   1  -1   30.12    0.72 
  -3   1  -1   29.23    0.79 
  -3   1  -1   30.32    0.77 
  -3   1  -1   30.37    0.81 
  -3   1  -1   30.31    0.76 
   3  -1   1   29.68    0.80 
   3  -1   1   30.20    0.83 
   3  -1   1   30.08    0.73 
   3  -1   1   30.38    0.77 
   3  -1   1   30.73    0.83 
   3  -1   1   31.22    0.76 
   3  -1   1   32.60    0.78 
   3  -1   1   30.04    0.82 
  -4   1  -1   17.14    0.54 
  -4   1  -1   17.38    0.62 
  -4   1  -1   15.94    0.52 
  -4   1  -1   16.42    0.59 
  -4   1  -1   15.76    0.55 
  -4   1  -1   16.37    0.46 
   4  -1   1   16.51    0.51 
   4  -1   1   15.99    0.58 
   4  -1   1   16.82    0.55 
   4  -1   1   15.99    0.57 
   4  -1   1   16.05    0.59 
   4  -1   1   17.07    0.60 
   4  -1   1   16.62    0.54 
   4  -1   1   17.97    0.54 
  -5   1  -1   15.34    0.65 
  -5   1  -1   16.30    0.56 
  -5   1  -1   15.12    0.55 
  -5   1  -1   15.04    0.57 
  -5   1  -1   15.72    0.46 
  -5   1  -1   15.16    0.61 
   5  -1   1   14.50    0.55 
   5  -1   1   15.87    0.60 
   5  -1   1   13.99    0.59 
   5  -1   1   15.61    0.62 
   5  -1   1   16.66    0.55 
   5  -1   1   15.21    0.53 
   5  -1   1   15.95    0.57 
   5  -1   1   15.99    0.63 
  -6   1  -1    3.32    0.22 
  -6   1  -1    3.65    0.39 
  -6   1  -1    3.73    0.35 
  -6   1  -1    3.25    0.33 
  -6   1  -1    3.60    0.42 
  -6   1  -1    3.46    0.31 
   6  -1   1    3.85    0.37 
   6  -1   1    3.86    0.41 
   6  -1   1    3.18    0.32 
   6  -1   1    4.04    0.42 
   6  -1   1    2.47    0.27 
   6  -1   1    3.90    0.38 
   6  -1   1    3.86    0.33 
  -7   1  -1   63.51    1.61 
  -7   1  -1   61.32    1.78 
  -7   1  -1   61.37    1.67 
  -7   1  -1   61.56    1.36 
  -7   1  -1   61.06    1.67 
   7  -1   1   61.81    1.70 
   7  -1   1   59.12    1.65 
   7  -1   1   63.85    1.60 
   7  -1   1   61.93    1.72 
   7  -1   1   61.57    1.54 
   7  -1   1   62.07    1.70 
  -8   1  -1   48.91    1.61 
  -8   1  -1   51.99    1.52 
  -8   1  -1   50.42    1.51 
   8  -1   1   49.93    1.49 
   8  -1   1   52.48    1.45 
   8  -1   1   50.45    1.54 
   8  -1   1   52.11    1.40 
   8  -1   1   50.77    1.54 
   8  -1   1   53.94    1.58 
  -9   1  -1   82.17    2.36 
  -9   1  -1   81.65    2.21 
  -9   1  -1   79.94    2.21 
   9  -1   1   83.91    2.12 
   9  -1   1   85.14    2.30 
   9  -1   1   80.17    2.23 
   9  -1   1   81.60    2.06 
   9  -1   1   80.13    2.23 
   9  -1   1   82.62    2.20 
 -10   1  -1   44.41    1.50 
 -10   1  -1   43.73    1.49 
 -10   1  -1   43.07    1.61 
  10  -1   1   44.63    1.40 
  10  -1   1   43.06    1.50 
  10  -1   1   44.61    1.45 
  10  -1   1   43.26    1.53 
  10  -1   1   44.21    1.36 
  10  -1   1   43.66    1.50 
 -11   1  -1   30.00    1.42 
 -11   1  -1   34.42    1.34 
 -11   1  -1   33.73    1.34 
  11  -1   1   34.35    1.29 
  11  -1   1   33.29    1.22 
  11  -1   1   31.61    1.33 
  11  -1   1   32.99    1.21 
  11  -1   1   32.43    1.38 
  11  -1   1   33.55    1.33 
 -12   1  -1   51.39    1.80 
 -12   1  -1   49.88    1.93 
 -12   1  -1   50.99    1.80 
  12  -1   1   52.28    1.80 
  12  -1   1   50.44    1.82 
  12  -1   1   52.60    1.80 
  12  -1   1   50.18    1.62 
  12  -1   1   51.85    1.72 
  12  -1   1   49.46    1.61 
 -13   1  -1   48.63    2.00 
 -13   1  -1   49.52    1.82 
 -13   1  -1   52.60    1.88 
  13  -1   1   48.74    1.76 
  13  -1   1   47.77    1.84 
  13  -1   1   49.05    1.64 
  13  -1   1   48.92    1.82 
  13  -1   1   48.94    1.65 
 -14   1  -1    6.15    0.82 
 -14   1  -1    6.18    0.96 
 -14   1  -1    6.09    0.82 
  14  -1   1    6.27    0.71 
  14  -1   1    7.53    0.92 
  14  -1   1    6.93    0.77 
  14  -1   1    5.37    0.86 
 -15   1  -1    0.32    0.58 
 -15   1  -1   -0.51    0.58 
 -15   1  -1    0.35    0.68 
  15  -1   1    0.85    0.62 
  15  -1   1    0.30    0.49 
  15  -1   1    0.60    0.45 
  15  -1   1    0.15    0.65 
  15   0  -1   -0.34    0.41 
  15   0  -1    0.50    0.54 
  15   0  -1   -1.02    0.54 
  15   0  -1    0.05    0.48 
  15   0  -1    0.67    0.59 
 -15   0   1    0.31    0.64 
 -15   0   1    0.36    0.58 
  14   0  -1    4.15    0.67 
  14   0  -1    4.53    0.69 
  14   0  -1    4.59    0.78 
  14   0  -1    4.81    0.77 
  14   0  -1    3.67    0.69 
 -14   0   1    4.21    0.73 
 -14   0   1    4.30    0.85 
 -14   0   1    4.07    0.71 
  13   0  -1   11.42    1.00 
  13   0  -1   11.37    0.89 
  13   0  -1   12.11    0.98 
  13   0  -1   11.83    0.95 
  13   0  -1   11.18    0.87 
 -13   0   1   12.93    1.16 
 -13   0   1   11.39    0.97 
 -13   0   1   10.52    0.92 
  12   0  -1   38.69    1.41 
  12   0  -1   38.99    1.58 
  12   0  -1   41.34    1.46 
  12   0  -1   41.28    1.54 
  12   0  -1   40.32    1.51 
  12   0  -1   39.02    1.40 
 -12   0   1   37.99    1.51 
 -12   0   1   40.05    1.67 
 -12   0   1   42.10    1.58 
  11   0  -1   31.26    1.24 
  11   0  -1   30.37    1.30 
  11   0  -1   30.11    1.14 
  11   0  -1   28.95    1.14 
  11   0  -1   28.72    1.25 
  11   0  -1   30.32    1.20 
 -11   0   1   31.52    1.28 
 -11   0   1   30.06    1.35 
 -11   0   1   30.68    1.25 
  10   0  -1   37.51    1.24 
  10   0  -1   36.31    1.40 
  10   0  -1   36.41    1.34 
  10   0  -1   37.56    1.31 
  10   0  -1   38.99    1.27 
  10   0  -1   36.47    1.28 
 -10   0   1   35.14    1.29 
 -10   0   1   36.39    1.34 
 -10   0   1   38.44    1.45 
   9   0  -1   61.97    1.78 
   9   0  -1   60.68    1.65 
   9   0  -1   59.14    1.85 
   9   0  -1   60.98    1.72 
   9   0  -1   62.10    1.72 
   9   0  -1   59.69    1.69 
  -9   0   1   57.10    1.71 
  -9   0   1   61.72    1.86 
  -9   0   1   60.41    1.78 
   8   0  -1   -0.27    0.21 
   8   0  -1   -0.09    0.28 
   8   0  -1   -0.19    0.27 
   8   0  -1    0.02    0.29 
   8   0  -1    0.40    0.30 
   8   0  -1    0.27    0.25 
  -8   0   1    0.18    0.28 
  -8   0   1    0.18    0.29 
  -8   0   1    0.05    0.32 
  -8   0   1    0.12    0.22 
  -8   0   1    0.27    0.21 
   7   0  -1  203.04    4.70 
   7   0  -1  199.99    4.26 
   7   0  -1  196.85    4.36 
   7   0  -1  209.79    4.53 
   7   0  -1  201.13    4.48 
   7   0  -1  195.90    4.40 
   7   0  -1  198.10    4.42 
  -7   0   1  195.59    4.39 
  -7   0   1  192.32    4.35 
  -7   0   1  198.90    4.61 
  -7   0   1  196.30    4.45 
  -7   0   1  201.36    3.91 
  -7   0   1  197.73    4.32 
  -7   0   1  201.32    4.53 
   6   0  -1  192.14    4.21 
   6   0  -1  199.95    4.33 
   6   0  -1  192.42    4.47 
   6   0  -1  195.07    4.08 
   6   0  -1  191.18    4.23 
   6   0  -1  198.30    4.18 
   6   0  -1  188.46    4.26 
  -6   0   1  196.10    3.78 
  -6   0   1  188.98    4.28 
  -6   0   1  191.36    4.40 
  -6   0   1  187.68    4.16 
  -6   0   1  188.98    4.32 
  -6   0   1  184.98    4.18 
  -6   0   1  197.11    4.13 
   5   0  -1  114.93    2.78 
   5   0  -1  114.85    2.64 
   5   0  -1  114.85    2.58 
   5   0  -1  117.55    2.52 
   5   0  -1  111.92    2.61 
   5   0  -1  120.04    2.68 
   5   0  -1  115.01    2.59 
  -5   0   1  115.60    2.60 
  -5   0   1  113.14    2.67 
  -5   0   1  119.19    2.65 
  -5   0   1  117.57    2.31 
  -5   0   1  116.01    2.56 
  -5   0   1  114.59    2.58 
  -5   0   1  111.90    2.72 
   4   0  -1   56.44    1.31 
   4   0  -1   56.23    1.46 
   4   0  -1   55.66    1.36 
   4   0  -1   59.24    1.41 
   4   0  -1   56.20    1.39 
   4   0  -1   56.94    1.35 
   4   0  -1   57.52    1.36 
  -4   0   1   55.24    1.43 
  -4   0   1   58.67    1.35 
  -4   0   1   54.25    1.39 
  -4   0   1   57.99    1.37 
  -4   0   1   57.13    1.36 
  -4   0   1   55.72    1.36 
  -4   0   1   56.72    1.18 
   3   0  -1   37.22    0.93 
   3   0  -1   36.48    0.93 
   3   0  -1   35.42    0.91 
   3   0  -1   37.42    0.99 
   3   0  -1   37.38    0.90 
   3   0  -1   37.18    0.95 
   3   0  -1   37.69    0.89 
  -3   0   1   37.65    0.91 
  -3   0   1   37.21    0.92 
  -3   0   1   37.38    0.93 
  -3   0   1   35.18    0.96 
  -3   0   1   37.11    0.79 
  -3   0   1   36.95    0.94 
  -3   0   1   36.33    0.91 
   2   0  -1   44.84    1.02 
   2   0  -1   42.81    1.02 
   2   0  -1   45.60    0.99 
   2   0  -1   45.59    1.00 
   2   0  -1   44.61    1.09 
   2   0  -1   43.21    1.02 
   2   0  -1   44.39    1.05 
  -2   0   1   45.16    0.92 
  -2   0   1   43.14    1.00 
  -2   0   1   45.81    1.06 
  -2   0   1   44.74    1.05 
  -2   0   1   43.58    1.06 
  -2   0   1   45.07    1.00 
   1   0  -1  218.83    4.61 
   1   0  -1  230.46    4.50 
   1   0  -1  201.14    4.69 
   1   0  -1  229.26    4.44 
   1   0  -1  228.63    4.59 
   1   0  -1  230.24    4.55 
   1   0  -1  234.38    4.80 
  -1   0   1  229.39    4.50 
  -1   0   1  226.35    4.71 
  -1   0   1  227.61    4.45 
  -1   0   1  225.69    4.30 
  -1   0   1  189.03    4.68 
  -1   0   1  229.78    4.79 
   0   0  -1   19.27    0.45 
   0   0  -1   18.18    0.44 
   0   0   1   17.45    0.44 
   0   0   1   17.85    0.41 
  -1   0  -1  282.10    5.40 
  -1   0  -1  287.41    5.91 
  -1   0  -1  272.86    5.68 
  -1   0  -1  281.49    5.86 
   1   0   1  285.48    5.99 
   1   0   1  275.06    5.79 
   1   0   1  273.21    5.96 
   1   0   1  276.75    5.78 
   1   0   1  289.14    5.55 
   1   0   1  278.73    5.76 
   1   0   1  278.00    5.63 
   1   0   1  289.56    5.92 
   1   0   1  281.72    5.55 
   1   0   1  278.72    5.62 
  -2   0  -1   66.62    1.48 
  -2   0  -1   66.61    1.55 
  -2   0  -1   66.96    1.48 
  -2   0  -1   68.91    1.50 
  -2   0  -1   67.72    1.36 
  -2   0  -1   66.56    1.49 
   2   0   1   70.06    1.42 
   2   0   1   68.53    1.55 
   2   0   1   68.20    1.41 
   2   0   1   67.32    1.52 
   2   0   1   68.21    1.51 
   2   0   1   66.96    1.44 
   2   0   1   68.65    1.50 
  -3   0  -1  107.70    2.37 
  -3   0  -1  109.62    2.15 
  -3   0  -1  108.06    2.37 
  -3   0  -1  110.09    2.29 
  -3   0  -1  107.38    2.40 
  -3   0  -1  105.34    2.46 
  -3   0  -1  104.63    2.39 
   3   0   1  106.60    2.38 
   3   0   1  115.47    2.29 
   3   0   1  108.83    2.48 
   3   0   1  109.62    2.31 
   3   0   1  109.34    2.27 
   3   0   1  109.33    2.40 
   3   0   1  109.92    2.42 
   3   0   1  109.20    2.31 
  -4   0  -1    3.77    0.16 
  -4   0  -1    3.46    0.19 
  -4   0  -1    3.24    0.26 
  -4   0  -1    4.36    0.33 
  -4   0  -1    3.64    0.25 
  -4   0  -1    3.65    0.25 
  -4   0  -1    4.35    0.35 
  -4   0  -1    3.49    0.27 
   4   0   1    4.22    0.30 
   4   0   1    3.41    0.25 
   4   0   1    3.86    0.25 
   4   0   1    3.64    0.28 
   4   0   1    3.30    0.28 
   4   0   1    4.02    0.33 
   4   0   1    3.50    0.25 
   4   0   1    4.32    0.33 
  -5   0  -1    4.12    0.18 
  -5   0  -1    4.03    0.38 
  -5   0  -1    4.08    0.35 
  -5   0  -1    3.69    0.22 
  -5   0  -1    3.93    0.29 
  -5   0  -1    4.23    0.30 
  -5   0  -1    4.06    0.32 
   5   0   1    4.41    0.38 
   5   0   1    4.11    0.31 
   5   0   1    4.12    0.30 
   5   0   1    4.28    0.32 
   5   0   1    3.84    0.29 
   5   0   1    4.00    0.35 
   5   0   1    4.51    0.38 
   5   0   1    3.80    0.28 
  -6   0  -1  205.29    3.94 
  -6   0  -1  203.23    4.29 
  -6   0  -1  201.28    4.40 
  -6   0  -1  193.89    4.31 
  -6   0  -1  200.09    4.40 
  -6   0  -1  202.90    4.62 
  -6   0  -1  202.21    4.49 
   6   0   1  204.30    4.31 
   6   0   1  193.56    4.42 
   6   0   1  203.37    4.64 
   6   0   1  205.92    4.27 
   6   0   1  201.21    4.45 
   6   0   1  199.94    4.48 
   6   0   1  203.03    4.23 
   6   0   1  204.86    4.43 
  -7   0  -1  303.54    5.79 
  -7   0  -1  305.75    6.27 
  -7   0  -1  297.05    6.42 
  -7   0  -1  289.70    6.30 
  -7   0  -1  299.06    6.72 
  -7   0  -1  296.34    6.57 
  -7   0  -1  292.01    6.47 
   7   0   1  302.45    6.49 
   7   0   1  297.66    6.53 
   7   0   1  297.83    6.46 
   7   0   1  304.67    6.77 
   7   0   1  300.18    6.20 
   7   0   1  303.66    6.30 
  -8   0  -1    4.69    0.47 
  -8   0  -1    5.70    0.61 
  -8   0  -1    5.65    0.54 
   8   0   1    5.62    0.55 
   8   0   1    4.90    0.46 
   8   0   1    5.28    0.54 
   8   0   1    4.77    0.43 
   8   0   1    5.74    0.50 
   8   0   1    5.57    0.56 
  -9   0  -1    0.19    0.33 
  -9   0  -1    0.82    0.42 
  -9   0  -1    0.65    0.35 
   9   0   1    0.40    0.39 
   9   0   1    0.33    0.30 
   9   0   1    0.40    0.30 
   9   0   1    1.20    0.37 
   9   0   1    0.49    0.38 
   9   0   1    0.23    0.26 
 -10   0  -1   22.64    1.03 
 -10   0  -1   24.59    1.07 
 -10   0  -1   25.81    1.17 
  10   0   1   23.45    0.94 
  10   0   1   22.31    1.05 
  10   0   1   22.95    0.97 
  10   0   1   25.30    1.08 
  10   0   1   23.74    1.07 
  10   0   1   24.95    0.98 
 -11   0  -1   16.22    1.04 
 -11   0  -1   16.46    0.97 
 -11   0  -1   16.23    0.94 
  11   0   1   16.03    0.97 
  11   0   1   15.31    0.85 
  11   0   1   15.76    0.83 
  11   0   1   16.49    0.95 
  11   0   1   14.84    0.91 
  11   0   1   15.27    0.83 
 -12   0  -1   74.08    2.29 
 -12   0  -1   73.37    2.43 
 -12   0  -1   75.22    2.28 
  12   0   1   75.91    2.29 
  12   0   1   73.86    2.16 
  12   0   1   73.92    2.29 
  12   0   1   76.43    2.07 
  12   0   1   74.33    2.33 
  12   0   1   76.03    2.14 
 -13   0  -1   50.06    1.81 
 -13   0  -1   47.32    1.78 
 -13   0  -1   45.96    1.91 
  13   0   1   47.76    1.63 
  13   0   1   47.67    1.81 
  13   0   1   47.19    1.58 
  13   0   1   44.70    1.76 
  13   0   1   47.80    1.79 
 -14   0  -1    4.16    0.72 
 -14   0  -1    4.51    0.87 
 -14   0  -1    4.53    0.78 
  14   0   1    5.32    0.67 
  14   0   1    4.56    0.81 
  14   0   1    5.29    0.80 
  14   0   1    5.04    0.82 
  14   0   1    4.97    0.68 
 -15   0  -1   12.99    1.11 
 -15   0  -1   10.34    1.13 
 -15   0  -1   12.44    1.11 
  15   0   1   10.66    0.88 
  15   0   1   14.84    1.13 
  15   0   1    9.80    1.05 
  15   0   1   11.85    0.91 
  15  -1  -1    3.17    0.79 
  15  -1  -1    5.20    0.81 
  15  -1  -1    4.30    0.69 
  15  -1  -1    4.14    0.70 
 -15   1   1    2.18    0.72 
 -15   1   1    3.78    0.77 
  14  -1  -1    0.12    0.56 
  14  -1  -1   -0.33    0.46 
  14  -1  -1   -0.16    0.53 
  14  -1  -1    0.13    0.50 
  14  -1  -1   -0.30    0.45 
 -14   1   1   -0.01    0.69 
 -14   1   1    0.10    0.59 
 -14   1   1   -0.37    0.53 
  13  -1  -1   51.75    1.76 
  13  -1  -1   49.40    1.89 
  13  -1  -1   49.64    1.82 
  13  -1  -1   50.31    1.70 
  13  -1  -1   52.52    1.84 
  13  -1  -1   52.50    1.78 
 -13   1   1   50.53    2.01 
 -13   1   1   51.48    1.85 
 -13   1   1   50.20    1.90 
  12  -1  -1   48.04    1.61 
  12  -1  -1   44.91    1.55 
  12  -1  -1   46.23    1.61 
  12  -1  -1   46.09    1.66 
  12  -1  -1   44.11    1.64 
  12  -1  -1   46.16    1.74 
 -12   1   1   49.16    1.74 
 -12   1   1   45.23    1.80 
 -12   1   1   45.44    1.67 
  11  -1  -1    4.32    0.59 
  11  -1  -1    2.87    0.49 
  11  -1  -1    4.36    0.57 
  11  -1  -1    3.78    0.58 
  11  -1  -1    3.48    0.51 
  11  -1  -1    4.84    0.65 
 -11   1   1    3.00    0.63 
 -11   1   1    4.38    0.61 
 -11   1   1    2.82    0.50 
  10  -1  -1   24.41    1.01 
  10  -1  -1   21.54    0.94 
  10  -1  -1   22.79    1.02 
  10  -1  -1   22.38    1.06 
  10  -1  -1   21.88    1.01 
  10  -1  -1   22.16    0.97 
 -10   1   1   21.20    1.09 
 -10   1   1   20.45    1.00 
 -10   1   1   22.79    1.05 
   9  -1  -1   12.81    0.70 
   9  -1  -1   13.54    0.77 
   9  -1  -1   13.06    0.77 
   9  -1  -1   12.97    0.72 
   9  -1  -1   13.87    0.74 
   9  -1  -1   11.77    0.73 
  -9   1   1   13.28    0.82 
  -9   1   1   13.28    0.78 
  -9   1   1   13.63    0.77 
   8  -1  -1   19.94    0.82 
   8  -1  -1   19.98    0.83 
   8  -1  -1   20.43    0.86 
   8  -1  -1   18.43    0.76 
   8  -1  -1   21.48    0.91 
   8  -1  -1   19.06    0.82 
  -8   1   1   19.64    0.64 
  -8   1   1   20.49    0.87 
  -8   1   1   20.01    0.57 
  -8   1   1   20.41    0.93 
  -8   1   1   20.86    0.87 
   7  -1  -1   84.81    2.11 
   7  -1  -1   85.02    2.14 
   7  -1  -1   84.62    2.12 
   7  -1  -1   83.44    2.24 
   7  -1  -1   89.13    2.15 
   7  -1  -1   85.77    2.08 
   7  -1  -1   84.18    2.02 
  -7   1   1   82.23    1.97 
  -7   1   1   85.06    2.17 
  -7   1   1   81.82    1.79 
  -7   1   1   85.53    2.25 
  -7   1   1   83.31    2.07 
  -7   1   1   85.18    2.09 
  -7   1   1   83.39    2.10 
   6  -1  -1   48.93    1.40 
   6  -1  -1   47.83    1.30 
   6  -1  -1   48.08    1.30 
   6  -1  -1   48.88    1.25 
   6  -1  -1   50.81    1.34 
   6  -1  -1   47.92    1.33 
   6  -1  -1   47.68    1.32 
  -6   1   1   47.81    1.08 
  -6   1   1   48.32    1.30 
  -6   1   1   48.29    1.19 
  -6   1   1   47.64    1.32 
  -6   1   1   46.66    1.39 
  -6   1   1   47.64    1.34 
   5  -1  -1    9.04    0.46 
   5  -1  -1    8.40    0.43 
   5  -1  -1    8.12    0.45 
   5  -1  -1    9.34    0.45 
   5  -1  -1    8.79    0.47 
   5  -1  -1    9.45    0.44 
   5  -1  -1    8.91    0.42 
  -5   1   1    8.81    0.46 
  -5   1   1    8.59    0.43 
  -5   1   1    8.63    0.34 
  -5   1   1    8.80    0.44 
  -5   1   1    8.14    0.44 
  -5   1   1    8.90    0.49 
  -5   1   1    8.57    0.32 
   4  -1  -1    3.93    0.29 
   4  -1  -1    4.17    0.31 
   4  -1  -1    3.71    0.30 
   4  -1  -1    3.99    0.34 
   4  -1  -1    3.18    0.28 
   4  -1  -1    3.86    0.31 
   4  -1  -1    3.69    0.30 
  -4   1   1    3.06    0.21 
  -4   1   1    3.90    0.30 
  -4   1   1    3.44    0.29 
  -4   1   1    3.67    0.30 
  -4   1   1    3.73    0.34 
  -4   1   1    3.21    0.20 
  -4   1   1    3.45    0.29 
   3  -1  -1    8.72    0.35 
   3  -1  -1    9.04    0.37 
   3  -1  -1    8.61    0.36 
   3  -1  -1    8.68    0.33 
   3  -1  -1    8.95    0.38 
   3  -1  -1    8.60    0.37 
   3  -1  -1    8.22    0.37 
  -3   1   1    9.47    0.37 
  -3   1   1    8.40    0.37 
  -3   1   1    8.82    0.36 
  -3   1   1    8.43    0.36 
  -3   1   1    8.27    0.38 
  -3   1   1    8.44    0.30 
  -3   1   1    8.67    0.29 
   2  -1  -1  150.73    3.27 
   2  -1  -1  154.95    3.23 
   2  -1  -1  158.46    3.22 
   2  -1  -1  153.60    3.13 
   2  -1  -1  152.04    3.31 
   2  -1  -1  154.18    3.38 
  -2   1   1  157.88    3.16 
  -2   1   1  149.71    3.19 
  -2   1   1  149.98    3.33 
  -2   1   1  153.33    3.31 
  -2   1   1  152.40    3.32 
  -2   1   1  155.09    3.02 
   1  -1  -1   24.26    0.61 
   1  -1  -1   25.24    0.57 
   1  -1  -1   26.44    0.59 
   1  -1  -1   25.11    0.57 
   1  -1  -1   25.12    0.59 
   1  -1  -1   25.62    0.62 
   1  -1  -1   25.86    0.61 
  -1   1   1   25.00    0.61 
  -1   1   1   24.79    0.61 
  -1   1   1   25.46    0.59 
  -1   1   1   26.23    0.59 
  -1   1   1   25.33    0.57 
  -1   1   1   24.23    0.59 
   0  -1  -1  109.31    2.28 
   0  -1  -1  103.71    2.39 
   0  -1  -1  112.77    2.21 
   0  -1  -1  108.16    2.23 
   0  -1  -1  110.82    2.33 
   0  -1  -1  101.85    2.30 
   0   1   1  110.24    2.39 
   0   1   1  114.78    2.40 
   0   1   1  113.13    2.21 
   0   1   1  111.61    2.27 
   0   1   1  111.38    2.23 
  -1  -1  -1  489.97   10.09 
  -1  -1  -1  478.34   10.19 
  -1  -1  -1  487.05   10.07 
  -1  -1  -1  496.23    9.79 
  -1  -1  -1  488.88   10.02 
   1   1   1  464.94    9.80 
   1   1   1  488.27    9.90 
   1   1   1  461.40    9.21 
   1   1   1  453.66    9.68 
   1   1   1  481.50    9.61 
   1   1   1  490.33   10.28 
   1   1   1  462.57    9.50 
   1   1   1  490.96    9.77 
   1   1   1  475.01    9.52 
  -2  -1  -1   51.67    1.14 
  -2  -1  -1   50.33    1.17 
  -2  -1  -1   49.46    1.14 
  -2  -1  -1   49.51    1.13 
  -2  -1  -1   51.89    1.18 
   2   1   1   51.01    1.10 
   2   1   1   50.67    1.08 
   2   1   1   49.91    1.17 
   2   1   1   51.55    1.08 
   2   1   1   52.12    1.22 
   2   1   1   49.99    1.10 
   2   1   1   50.82    0.99 
   2   1   1   51.09    1.10 
   2   1   1   50.19    1.15 
   2   1   1   51.95    1.17 
  -3  -1  -1   70.83    1.66 
  -3  -1  -1   73.48    1.70 
  -3  -1  -1   73.11    1.67 
  -3  -1  -1   74.05    1.60 
  -3  -1  -1   74.03    1.68 
  -3  -1  -1   75.82    1.73 
   3   1   1   77.39    1.60 
   3   1   1   74.87    1.62 
   3   1   1   74.56    1.58 
   3   1   1   74.85    1.62 
   3   1   1   74.23    1.77 
   3   1   1   74.24    1.68 
   3   1   1   74.10    1.71 
  -4  -1  -1   13.43    0.45 
  -4  -1  -1   13.21    0.45 
  -4  -1  -1   14.06    0.51 
  -4  -1  -1   13.55    0.47 
  -4  -1  -1   12.64    0.51 
  -4  -1  -1   12.72    0.46 
  -4  -1  -1   14.15    0.45 
   4   1   1   13.66    0.51 
   4   1   1   14.72    0.46 
   4   1   1   13.26    0.43 
   4   1   1   13.74    0.53 
   4   1   1   13.31    0.46 
   4   1   1   13.66    0.53 
   4   1   1   13.58    0.47 
  -5  -1  -1  131.37    3.09 
  -5  -1  -1  132.85    2.97 
  -5  -1  -1  136.22    2.88 
  -5  -1  -1  130.64    3.00 
  -5  -1  -1  139.24    3.02 
  -5  -1  -1  128.56    2.89 
   5   1   1  131.32    3.14 
   5   1   1  133.07    3.03 
   5   1   1  135.51    2.85 
   5   1   1  137.43    2.91 
   5   1   1  133.36    2.90 
   5   1   1  132.01    2.99 
   5   1   1  134.03    2.84 
  -6  -1  -1  479.23    9.70 
  -6  -1  -1  488.34   10.33 
  -6  -1  -1  459.50    9.80 
  -6  -1  -1  471.46   10.34 
  -6  -1  -1  466.62   10.21 
  -6  -1  -1  475.51    9.93 
   6   1   1  476.87   10.11 
   6   1   1  481.99   10.04 
   6   1   1  482.23   10.50 
   6   1   1  476.25    9.65 
   6   1   1  496.73    9.69 
   6   1   1  487.23    9.86 
   6   1   1  478.91    9.80 
  -7  -1  -1  111.68    2.65 
  -7  -1  -1  114.07    2.76 
  -7  -1  -1  112.17    2.73 
  -7  -1  -1  117.35    2.69 
  -7  -1  -1  113.22    2.86 
  -7  -1  -1  117.81    2.65 
   7   1   1  116.04    2.81 
   7   1   1  116.53    2.67 
   7   1   1  120.65    2.62 
   7   1   1  118.55    2.59 
   7   1   1  114.78    2.75 
   7   1   1  118.25    2.90 
  -8  -1  -1   13.59    0.69 
  -8  -1  -1   13.12    0.74 
  -8  -1  -1   13.31    0.54 
  -8  -1  -1   13.55    0.70 
   8   1   1   13.79    0.61 
   8   1   1   14.64    0.72 
   8   1   1   13.50    0.73 
   8   1   1   13.07    0.65 
   8   1   1   14.43    0.74 
  -9  -1  -1   -0.04    0.31 
  -9  -1  -1    0.29    0.33 
  -9  -1  -1    0.41    0.38 
   9   1   1    0.51    0.37 
   9   1   1    0.09    0.28 
   9   1   1    0.14    0.28 
   9   1   1    0.21    0.30 
   9   1   1   -0.15    0.33 
 -10  -1  -1   11.44    0.85 
 -10  -1  -1   11.26    0.76 
 -10  -1  -1   11.34    0.79 
  10   1   1   11.78    0.71 
  10   1   1   12.23    0.69 
  10   1   1   10.47    0.75 
  10   1   1   11.52    0.78 
  10   1   1   11.87    0.79 
 -11  -1  -1   51.70    1.70 
 -11  -1  -1   52.11    1.84 
 -11  -1  -1   51.74    1.72 
  11   1   1   51.66    1.61 
  11   1   1   52.31    1.76 
  11   1   1   53.29    1.73 
  11   1   1   52.24    1.78 
  11   1   1   50.64    1.53 
 -12  -1  -1   39.47    1.64 
 -12  -1  -1   40.70    1.53 
 -12  -1  -1   42.68    1.57 
  12   1   1   38.82    1.42 
  12   1   1   38.66    1.56 
  12   1   1   41.49    1.59 
  12   1   1   40.52    1.55 
  12   1   1   40.56    1.37 
 -13  -1  -1   22.14    1.22 
 -13  -1  -1   22.76    1.32 
 -13  -1  -1   23.34    1.24 
  13   1   1   21.59    1.21 
  13   1   1   21.56    1.05 
  13   1   1   22.42    1.10 
  13   1   1   21.67    1.23 
  13   1   1   24.01    1.25 
 -14  -1  -1    0.04    0.67 
 -14  -1  -1   -0.35    0.49 
 -14  -1  -1   -0.25    0.49 
  14   1   1    0.36    0.57 
  14   1   1   -0.05    0.54 
  14   1   1    0.27    0.52 
  14   1   1    0.32    0.45 
  14   1   1    0.08    0.46 
 -15  -1  -1    6.30    0.88 
 -15  -1  -1    4.73    0.77 
 -15  -1  -1    5.39    0.95 
  15   1   1    4.99    0.83 
  15   1   1    8.32    0.97 
  15   1   1    5.81    0.89 
  15   1   1    5.44    0.69 
  15   1   1    4.81    0.66 
  14  -2  -1   29.66    1.36 
  14  -2  -1   30.18    1.34 
  14  -2  -1   29.71    1.43 
  14  -2  -1   29.58    1.48 
 -14   2   1   32.05    1.53 
 -14   2   1   28.12    1.61 
 -14   2   1   29.24    1.59 
  13  -2  -1   76.72    2.43 
  13  -2  -1   76.61    2.28 
  13  -2  -1   80.80    2.42 
  13  -2  -1   82.56    2.44 
  13  -2  -1   77.67    2.30 
 -13   2   1   77.39    2.44 
 -13   2   1   80.40    2.54 
 -13   2   1   76.27    2.61 
  12  -2  -1   61.48    1.89 
  12  -2  -1   59.86    2.01 
  12  -2  -1   60.64    1.89 
  12  -2  -1   62.36    1.98 
  12  -2  -1   61.13    1.99 
  12  -2  -1   61.91    2.07 
 -12   2   1   61.18    2.06 
 -12   2   1   61.37    2.17 
 -12   2   1   62.60    2.04 
  11  -2  -1   10.67    0.73 
  11  -2  -1   11.02    0.91 
  11  -2  -1   11.00    0.80 
  11  -2  -1   11.39    0.79 
  11  -2  -1   10.68    0.77 
  11  -2  -1   11.14    0.79 
 -11   2   1   11.78    0.86 
 -11   2   1    9.61    0.92 
 -11   2   1   10.32    0.86 
  10  -2  -1   13.82    0.83 
  10  -2  -1   14.60    0.86 
  10  -2  -1   14.95    0.90 
  10  -2  -1   15.86    0.88 
  10  -2  -1   16.11    0.82 
  10  -2  -1   14.59    0.81 
 -10   2   1   15.66    0.96 
 -10   2   1   14.13    0.86 
 -10   2   1   15.02    0.88 
   9  -2  -1   35.51    1.26 
   9  -2  -1   33.60    1.18 
   9  -2  -1   33.67    1.22 
   9  -2  -1   36.01    1.17 
   9  -2  -1   33.90    1.27 
   9  -2  -1   37.01    1.27 
  -9   2   1   35.34    1.28 
  -9   2   1   34.91    1.34 
  -9   2   1   35.69    1.26 
   8  -2  -1   63.38    1.71 
   8  -2  -1   63.61    1.76 
   8  -2  -1   61.77    1.76 
   8  -2  -1   63.25    1.84 
   8  -2  -1   62.76    1.65 
   8  -2  -1   63.64    1.76 
  -8   2   1   61.33    1.78 
  -8   2   1   61.16    1.73 
  -8   2   1   62.07    1.87 
  -8   2   1   61.84    1.43 
   7  -2  -1  207.64    4.78 
   7  -2  -1  203.05    4.61 
   7  -2  -1  209.01    4.58 
   7  -2  -1  209.26    4.48 
   7  -2  -1  199.88    4.55 
   7  -2  -1  202.84    4.39 
  -7   2   1  198.92    4.44 
  -7   2   1  207.31    4.67 
  -7   2   1  205.05    4.53 
  -7   2   1  203.15    4.13 
  -7   2   1  203.10    4.48 
  -7   2   1  200.28    4.45 
  -7   2   1  204.60    4.76 
   6  -2  -1   12.04    0.59 
   6  -2  -1   11.64    0.53 
   6  -2  -1   11.42    0.57 
   6  -2  -1   11.82    0.56 
   6  -2  -1   11.55    0.58 
   6  -2  -1   11.72    0.57 
   6  -2  -1   12.61    0.56 
  -6   2   1   11.68    0.63 
  -6   2   1   11.95    0.55 
  -6   2   1   11.68    0.38 
  -6   2   1   10.69    0.42 
  -6   2   1   11.17    0.58 
  -6   2   1   11.70    0.54 
  -6   2   1   10.95    0.57 
   5  -2  -1    2.85    0.28 
   5  -2  -1    3.32    0.34 
   5  -2  -1    4.14    0.36 
   5  -2  -1    3.37    0.34 
   5  -2  -1    3.07    0.34 
   5  -2  -1    3.16    0.30 
   5  -2  -1    3.08    0.34 
  -5   2   1    2.93    0.18 
  -5   2   1    2.84    0.30 
  -5   2   1    3.64    0.35 
  -5   2   1    2.84    0.29 
  -5   2   1    3.18    0.24 
  -5   2   1    3.79    0.38 
  -5   2   1    3.02    0.32 
   4  -2  -1   34.08    0.94 
   4  -2  -1   33.20    0.91 
   4  -2  -1   32.91    0.87 
   4  -2  -1   32.76    0.91 
   4  -2  -1   32.54    0.95 
   4  -2  -1   33.90    0.91 
   4  -2  -1   33.74    0.96 
  -4   2   1   33.45    0.91 
  -4   2   1   31.62    0.80 
  -4   2   1   31.83    0.93 
  -4   2   1   33.54    0.93 
  -4   2   1   32.99    0.82 
  -4   2   1   32.07    0.97 
  -4   2   1   33.76    0.91 
   3  -2  -1   19.87    0.59 
   3  -2  -1   20.31    0.60 
   3  -2  -1   19.10    0.63 
   3  -2  -1   19.76    0.57 
   3  -2  -1   19.17    0.61 
   3  -2  -1   20.09    0.60 
   3  -2  -1   20.19    0.62 
  -3   2   1   19.57    0.61 
  -3   2   1   19.60    0.55 
  -3   2   1   20.02    0.62 
  -3   2   1   19.45    0.59 
  -3   2   1   18.85    0.63 
  -3   2   1   19.37    0.51 
  -3   2   1   19.27    0.59 
   2  -2  -1    1.03    0.17 
   2  -2  -1    0.93    0.15 
   2  -2  -1    0.82    0.17 
   2  -2  -1    0.83    0.14 
   2  -2  -1    0.79    0.14 
   2  -2  -1    1.01    0.14 
   2  -2  -1    1.00    0.16 
  -2   2   1    0.88    0.16 
  -2   2   1    0.81    0.10 
  -2   2   1    0.68    0.13 
  -2   2   1    0.71    0.13 
  -2   2   1    0.70    0.15 
  -2   2   1    0.87    0.16 
  -2   2   1    1.13    0.17 
   1  -2  -1   31.54    0.77 
   1  -2  -1   30.20    0.78 
   1  -2  -1   31.60    0.77 
   1  -2  -1   31.65    0.77 
   1  -2  -1   31.23    0.73 
   1  -2  -1   32.87    0.74 
   1  -2  -1   30.56    0.73 
  -1   2   1   30.82    0.74 
  -1   2   1   30.10    0.73 
  -1   2   1   30.36    0.75 
  -1   2   1   29.92    0.75 
  -1   2   1   29.43    0.72 
  -1   2   1   30.61    0.76 
  -1   2   1   29.69    0.76 
   0  -2  -1    9.67    0.34 
   0  -2  -1   11.01    0.31 
   0  -2  -1   10.93    0.33 
   0  -2  -1   10.71    0.27 
   0  -2  -1   10.62    0.31 
   0  -2  -1   10.89    0.31 
   0  -2  -1   10.55    0.31 
   0  -2  -1   10.22    0.34 
   0   2   1   10.93    0.27 
   0   2   1   11.04    0.34 
   0   2   1   10.74    0.30 
   0   2   1   11.31    0.33 
   0   2   1   10.98    0.31 
   0   2   1   10.83    0.31 
  -1  -2  -1  224.91    4.84 
  -1  -2  -1  228.55    4.76 
  -1  -2  -1  226.51    4.65 
  -1  -2  -1  230.69    4.60 
  -1  -2  -1  227.40    4.84 
  -1  -2  -1  234.36    4.72 
  -1  -2  -1  240.00    4.82 
  -1  -2  -1  236.39    4.99 
   1   2   1  229.23    4.65 
   1   2   1  227.92    4.77 
   1   2   1  228.33    4.84 
   1   2   1  234.96    4.60 
   1   2   1  227.80    4.60 
   1   2   1  224.00    4.69 
   1   2   1  223.16    4.65 
   1   2   1  233.97    4.97 
   1   2   1  234.47    4.47 
  -2  -2  -1   30.57    0.78 
  -2  -2  -1   30.07    0.74 
  -2  -2  -1   31.12    0.75 
  -2  -2  -1   29.96    0.73 
  -2  -2  -1   29.92    0.71 
  -2  -2  -1   31.12    0.82 
  -2  -2  -1   30.25    0.75 
   2   2   1   31.61    0.77 
   2   2   1   30.69    0.66 
   2   2   1   31.03    0.73 
   2   2   1   30.68    0.73 
   2   2   1   30.67    0.76 
   2   2   1   30.64    0.73 
   2   2   1   31.27    0.79 
   2   2   1   30.97    0.72 
   2   2   1   30.64    0.70 
   2   2   1   32.45    0.82 
  -3  -2  -1   36.20    0.92 
  -3  -2  -1   36.99    0.88 
  -3  -2  -1   35.89    0.90 
  -3  -2  -1   36.89    0.94 
  -3  -2  -1   39.18    0.99 
  -3  -2  -1   36.10    0.92 
  -3  -2  -1   36.71    0.92 
  -3  -2  -1   37.00    0.96 
   3   2   1   37.92    1.00 
   3   2   1   38.47    0.88 
   3   2   1   37.28    0.90 
   3   2   1   35.49    0.96 
   3   2   1   36.72    0.90 
   3   2   1   38.01    0.83 
   3   2   1   38.42    0.90 
   3   2   1   37.14    0.95 
   3   2   1   36.81    0.93 
   3   2   1   37.69    0.76 
   3   2   1   36.91    0.85 
  -4  -2  -1   31.44    0.83 
  -4  -2  -1   32.23    0.82 
  -4  -2  -1   30.31    0.85 
  -4  -2  -1   31.54    0.89 
  -4  -2  -1   31.97    0.89 
  -4  -2  -1   30.51    0.87 
   4   2   1   31.33    0.91 
   4   2   1   32.78    0.85 
   4   2   1   32.05    0.94 
   4   2   1   31.06    0.90 
   4   2   1   33.31    0.82 
   4   2   1   31.73    0.79 
   4   2   1   31.37    0.87 
   4   2   1   32.63    0.77 
   4   2   1   32.80    0.84 
  -5  -2  -1  277.20    5.86 
  -5  -2  -1  258.96    5.59 
  -5  -2  -1  269.40    5.46 
  -5  -2  -1  264.62    5.53 
  -5  -2  -1  259.89    5.81 
  -5  -2  -1  258.51    5.73 
   5   2   1  262.70    5.52 
   5   2   1  263.73    5.94 
   5   2   1  271.80    5.45 
   5   2   1  260.85    5.71 
   5   2   1  263.11    5.57 
   5   2   1  262.07    5.41 
   5   2   1  269.45    5.65 
   5   2   1  269.02    5.52 
  -6  -2  -1  184.49    4.23 
  -6  -2  -1  196.59    4.31 
  -6  -2  -1  190.62    4.32 
  -6  -2  -1  191.25    4.04 
  -6  -2  -1  187.30    4.16 
  -6  -2  -1  184.06    4.08 
   6   2   1  188.70    4.25 
   6   2   1  195.74    4.02 
   6   2   1  191.49    4.18 
   6   2   1  188.86    4.08 
   6   2   1  187.99    4.09 
   6   2   1  189.83    3.98 
   6   2   1  191.18    4.42 
  -7  -2  -1   31.77    1.08 
  -7  -2  -1   33.13    1.00 
  -7  -2  -1   31.45    1.03 
  -7  -2  -1   30.75    0.98 
  -7  -2  -1   33.61    0.99 
  -7  -2  -1   31.30    1.02 
   7   2   1   33.89    1.14 
   7   2   1   31.16    0.93 
   7   2   1   34.55    1.11 
   7   2   1   33.02    1.01 
   7   2   1   35.90    0.97 
   7   2   1   32.41    0.93 
   7   2   1   32.22    1.03 
  -8  -2  -1    2.21    0.32 
  -8  -2  -1    1.50    0.35 
  -8  -2  -1    1.52    0.38 
  -8  -2  -1    1.57    0.33 
   8   2   1    2.45    0.33 
   8   2   1    1.97    0.38 
   8   2   1    1.64    0.27 
   8   2   1    1.37    0.32 
   8   2   1    1.81    0.38 
   8   2   1    1.45    0.38 
  -9  -2  -1   16.35    0.68 
  -9  -2  -1   15.60    0.79 
  -9  -2  -1   15.73    0.80 
  -9  -2  -1   15.36    0.85 
   9   2   1   15.31    0.83 
   9   2   1   15.96    0.76 
   9   2   1   16.11    0.71 
   9   2   1   15.46    0.80 
   9   2   1   15.86    0.83 
   9   2   1   16.46    0.66 
 -10  -2  -1   83.27    2.30 
 -10  -2  -1   83.45    2.31 
 -10  -2  -1   84.90    2.42 
  10   2   1   89.33    2.33 
  10   2   1   82.97    2.43 
  10   2   1   84.43    2.12 
  10   2   1   82.43    2.36 
  10   2   1   83.37    2.21 
  10   2   1   86.47    2.15 
 -11  -2  -1   82.19    2.31 
 -11  -2  -1   82.64    2.44 
 -11  -2  -1   79.16    2.31 
  11   2   1   78.84    2.18 
  11   2   1   79.93    2.08 
  11   2   1   80.54    2.36 
  11   2   1   82.25    2.30 
  11   2   1   81.82    2.44 
  11   2   1   78.17    2.11 
 -12  -2  -1   25.23    1.18 
 -12  -2  -1   24.40    1.19 
 -12  -2  -1   22.00    1.22 
  12   2   1   23.14    1.21 
  12   2   1   22.60    1.13 
  12   2   1   22.67    1.20 
  12   2   1   23.61    1.00 
  12   2   1   21.14    1.05 
 -13  -2  -1    0.40    0.60 
 -13  -2  -1    0.08    0.47 
 -13  -2  -1    0.00    0.48 
  13   2   1   -0.03    0.49 
  13   2   1   -0.11    0.48 
  13   2   1   -0.11    0.38 
  13   2   1   -0.95    0.41 
  13   2   1   -0.02    0.41 
 -14  -2  -1   18.92    1.18 
 -14  -2  -1   19.28    1.21 
 -14  -2  -1   17.61    1.32 
  14   2   1   19.10    1.24 
  14   2   1   19.15    1.09 
  14   2   1   19.18    1.22 
  14   2   1   19.33    1.03 
  14   2   1   16.90    1.13 
 -15  -2  -1   -0.47    0.67 
 -15  -2  -1    0.08    0.58 
 -15  -2  -1    0.00    0.55 
  15   2   1    0.35    0.60 
  15   2   1   -0.40    0.54 
  15   2   1   -0.35    0.44 
  15   2   1    0.97    0.62 
  15   2   1    0.41    0.48 
  14  -3  -1   57.05    2.03 
  14  -3  -1   53.42    2.08 
  14  -3  -1   58.43    2.10 
  14  -3  -1   57.22    1.95 
  14  -3  -1   56.42    1.92 
 -14   3   1   53.76    2.22 
 -14   3   1   56.99    2.10 
  13  -3  -1   60.66    2.06 
  13  -3  -1   60.47    1.98 
  13  -3  -1   60.37    2.15 
  13  -3  -1   60.75    2.11 
  13  -3  -1   58.78    1.96 
 -13   3   1   65.62    2.16 
 -13   3   1   64.04    2.23 
 -13   3   1   65.16    2.35 
  12  -3  -1   25.56    1.16 
  12  -3  -1   23.55    1.15 
  12  -3  -1   25.86    1.29 
  12  -3  -1   27.84    1.24 
  12  -3  -1   26.21    1.27 
 -12   3   1   25.13    1.38 
 -12   3   1   25.09    1.28 
 -12   3   1   26.84    1.32 
  11  -3  -1   10.99    0.81 
  11  -3  -1    9.57    0.73 
  11  -3  -1   10.99    0.80 
  11  -3  -1   11.73    0.82 
  11  -3  -1   11.39    0.95 
  11  -3  -1   11.10    0.92 
 -11   3   1   11.74    0.88 
 -11   3   1   11.95    0.96 
 -11   3   1   10.58    0.90 
  10  -3  -1   -0.28    0.32 
  10  -3  -1   -0.05    0.35 
  10  -3  -1   -0.03    0.42 
  10  -3  -1   -0.40    0.28 
  10  -3  -1    0.01    0.42 
  10  -3  -1    0.02    0.34 
 -10   3   1   -0.54    0.38 
 -10   3   1   -0.04    0.43 
 -10   3   1    0.27    0.37 
   9  -3  -1   23.77    1.04 
   9  -3  -1   21.40    1.00 
   9  -3  -1   21.79    0.98 
   9  -3  -1   23.31    0.94 
   9  -3  -1   21.97    0.96 
   9  -3  -1   21.43    0.92 
  -9   3   1   21.20    1.07 
  -9   3   1   22.96    1.02 
  -9   3   1   22.21    1.02 
   8  -3  -1   53.49    1.60 
   8  -3  -1   52.16    1.51 
   8  -3  -1   52.97    1.56 
   8  -3  -1   55.29    1.51 
   8  -3  -1   53.39    1.62 
   8  -3  -1   53.80    1.63 
  -8   3   1   51.58    1.68 
  -8   3   1   53.05    1.61 
  -8   3   1   50.76    1.31 
  -8   3   1   51.78    1.58 
   7  -3  -1   46.75    1.32 
   7  -3  -1   44.11    1.38 
   7  -3  -1   44.21    1.35 
   7  -3  -1   44.12    1.39 
   7  -3  -1   45.14    1.28 
   7  -3  -1   45.24    1.33 
  -7   3   1   45.79    1.39 
  -7   3   1   45.67    1.37 
  -7   3   1   44.06    1.32 
  -7   3   1   44.48    1.45 
  -7   3   1   45.40    1.16 
   6  -3  -1    3.68    0.40 
   6  -3  -1    2.81    0.33 
   6  -3  -1    3.09    0.35 
   6  -3  -1    3.26    0.38 
   6  -3  -1    3.41    0.40 
   6  -3  -1    2.79    0.37 
   6  -3  -1    2.72    0.32 
  -6   3   1    2.93    0.38 
  -6   3   1    2.21    0.29 
  -6   3   1    2.75    0.41 
  -6   3   1    2.96    0.34 
  -6   3   1    2.82    0.36 
  -6   3   1    3.14    0.28 
   5  -3  -1    8.22    0.48 
   5  -3  -1    8.69    0.46 
   5  -3  -1    8.44    0.50 
   5  -3  -1    8.75    0.46 
   5  -3  -1    8.69    0.44 
   5  -3  -1    9.81    0.48 
   5  -3  -1    8.32    0.29 
   5  -3  -1    8.34    0.46 
  -5   3   1    8.90    0.48 
  -5   3   1    8.55    0.40 
  -5   3   1    8.30    0.49 
  -5   3   1    8.12    0.44 
  -5   3   1    8.28    0.28 
  -5   3   1    8.40    0.49 
  -5   3   1    9.17    0.46 
   4  -3  -1    2.78    0.18 
   4  -3  -1    3.73    0.35 
   4  -3  -1    3.47    0.32 
   4  -3  -1    2.58    0.26 
   4  -3  -1    3.71    0.32 
   4  -3  -1    2.55    0.27 
   4  -3  -1    2.72    0.27 
   4  -3  -1    2.54    0.31 
  -4   3   1    2.83    0.27 
  -4   3   1    3.19    0.32 
  -4   3   1    2.68    0.25 
  -4   3   1    2.85    0.28 
  -4   3   1    2.81    0.17 
  -4   3   1    2.84    0.31 
  -4   3   1    3.27    0.35 
   3  -3  -1   47.40    1.21 
   3  -3  -1   48.72    1.13 
   3  -3  -1   48.95    1.18 
   3  -3  -1   49.49    1.24 
   3  -3  -1   45.49    1.14 
   3  -3  -1   49.56    1.18 
   3  -3  -1   46.43    1.25 
   3  -3  -1   48.78    1.22 
  -3   3   1   49.01    1.19 
  -3   3   1   48.33    1.15 
  -3   3   1   45.91    1.24 
  -3   3   1   48.62    1.21 
  -3   3   1   47.76    1.18 
  -3   3   1   47.07    1.23 
   2  -3  -1  171.16    3.70 
   2  -3  -1  173.61    3.77 
   2  -3  -1  170.31    3.80 
   2  -3  -1  173.99    3.57 
   2  -3  -1  178.50    3.77 
   2  -3  -1  173.06    3.75 
   2  -3  -1  171.43    3.61 
   2  -3  -1  176.88    3.68 
  -2   3   1  172.26    3.50 
  -2   3   1  171.73    3.77 
  -2   3   1  168.94    3.61 
  -2   3   1  169.01    3.59 
  -2   3   1  173.62    3.65 
  -2   3   1  169.42    3.77 
   1  -3  -1   88.81    2.02 
   1  -3  -1   90.58    1.95 
   1  -3  -1   90.28    2.03 
   1  -3  -1   92.23    1.94 
   1  -3  -1   92.80    2.04 
   1  -3  -1   89.32    2.00 
  -1   3   1   89.91    1.91 
  -1   3   1   89.61    2.00 
  -1   3   1   90.61    1.98 
  -1   3   1   89.68    1.93 
  -1   3   1   88.36    2.01 
  -1   3   1   87.32    2.01 
  -1   3   1   90.37    1.95 
   0  -3  -1  287.21    5.84 
   0  -3  -1  277.25    5.64 
   0  -3  -1  281.44    5.78 
   0  -3  -1  275.00    6.01 
   0  -3  -1  277.38    5.59 
   0  -3  -1  280.71    5.77 
   0  -3  -1  256.72    5.91 
   0   3   1  269.46    5.45 
   0   3   1  282.94    5.86 
   0   3   1  279.29    5.64 
   0   3   1  276.86    5.74 
   0   3   1  281.29    5.58 
   0   3   1  278.58    5.98 
   0   3   1  275.27    5.69 
  -1  -3  -1   16.03    0.48 
  -1  -3  -1   16.40    0.42 
  -1  -3  -1   17.37    0.48 
  -1  -3  -1   16.18    0.54 
  -1  -3  -1   17.12    0.42 
  -1  -3  -1   15.86    0.47 
  -1  -3  -1   16.86    0.47 
   1   3   1   15.89    0.45 
   1   3   1   16.28    0.46 
   1   3   1   15.63    0.47 
   1   3   1   15.60    0.46 
   1   3   1   16.23    0.48 
   1   3   1   16.09    0.46 
   1   3   1   16.32    0.45 
  -2  -3  -1  146.83    3.17 
  -2  -3  -1  145.77    3.08 
  -2  -3  -1  147.12    3.04 
  -2  -3  -1  153.98    3.35 
  -2  -3  -1  145.29    3.19 
  -2  -3  -1  152.43    3.17 
   2   3   1  150.27    2.95 
   2   3   1  143.97    3.11 
   2   3   1  144.60    3.08 
   2   3   1  146.48    3.18 
   2   3   1  145.62    3.03 
   2   3   1  151.13    3.19 
   2   3   1  149.35    3.30 
  -3  -3  -1   17.54    0.55 
  -3  -3  -1   18.12    0.59 
  -3  -3  -1   18.64    0.53 
  -3  -3  -1   18.64    0.54 
  -3  -3  -1   17.89    0.54 
  -3  -3  -1   18.31    0.62 
   3   3   1   18.13    0.55 
   3   3   1   18.55    0.53 
   3   3   1   17.41    0.61 
   3   3   1   18.27    0.60 
   3   3   1   18.30    0.58 
   3   3   1   18.32    0.51 
   3   3   1   17.81    0.53 
   3   3   1   17.81    0.55 
   3   3   1   18.80    0.47 
  -4  -3  -1  223.79    4.88 
  -4  -3  -1  214.15    4.74 
  -4  -3  -1  215.78    4.55 
  -4  -3  -1  217.21    4.59 
  -4  -3  -1  211.11    4.71 
  -4  -3  -1  209.77    4.66 
  -4  -3  -1  219.35    4.48 
   4   3   1  215.08    4.44 
   4   3   1  216.13    4.48 
   4   3   1  219.86    4.51 
   4   3   1  220.58    4.89 
   4   3   1  219.06    4.54 
   4   3   1  213.53    4.62 
   4   3   1  221.03    4.62 
   4   3   1  215.53    4.70 
   4   3   1  227.81    4.70 
   4   3   1  218.46    4.23 
  -5  -3  -1  238.74    5.21 
  -5  -3  -1  240.82    5.30 
  -5  -3  -1  243.60    5.00 
  -5  -3  -1  234.44    5.06 
  -5  -3  -1  241.25    5.13 
  -5  -3  -1  237.49    5.26 
  -5  -3  -1  240.65    5.41 
   5   3   1  240.43    5.15 
   5   3   1  242.38    5.46 
   5   3   1  242.80    5.05 
   5   3   1  244.19    5.26 
   5   3   1  241.38    5.17 
   5   3   1  242.60    4.95 
   5   3   1  240.32    5.07 
   5   3   1  249.31    5.24 
   5   3   1  242.75    4.99 
  -6  -3  -1   11.73    0.56 
  -6  -3  -1   10.70    0.53 
  -6  -3  -1   11.10    0.49 
  -6  -3  -1   11.05    0.54 
  -6  -3  -1   10.32    0.50 
  -6  -3  -1   11.40    0.56 
  -6  -3  -1   11.26    0.53 
   6   3   1   11.20    0.39 
   6   3   1   10.54    0.47 
   6   3   1   11.13    0.48 
   6   3   1   10.92    0.59 
   6   3   1   11.62    0.58 
   6   3   1   11.00    0.52 
   6   3   1   10.64    0.52 
   6   3   1   11.02    0.46 
  -7  -3  -1    5.93    0.43 
  -7  -3  -1    7.24    0.47 
  -7  -3  -1    6.41    0.49 
  -7  -3  -1    6.67    0.47 
  -7  -3  -1    6.45    0.47 
  -7  -3  -1    6.37    0.42 
   7   3   1    6.81    0.52 
   7   3   1    6.71    0.53 
   7   3   1    6.91    0.41 
   7   3   1    5.44    0.39 
   7   3   1    6.41    0.46 
   7   3   1    6.76    0.34 
   7   3   1    6.42    0.48 
  -8  -3  -1   19.34    0.81 
  -8  -3  -1   19.47    0.82 
  -8  -3  -1   19.77    0.79 
  -8  -3  -1   19.47    0.86 
   8   3   1   18.83    0.79 
   8   3   1   19.09    0.79 
   8   3   1   18.51    0.88 
   8   3   1   19.02    0.87 
   8   3   1   19.27    0.65 
   8   3   1   19.25    0.71 
  -9  -3  -1   43.11    1.36 
  -9  -3  -1   41.00    1.42 
  -9  -3  -1   43.09    1.39 
  -9  -3  -1   43.81    1.33 
   9   3   1   42.71    1.44 
   9   3   1   41.49    1.47 
   9   3   1   43.62    1.34 
   9   3   1   42.10    1.23 
   9   3   1   43.25    1.19 
   9   3   1   44.53    1.37 
 -10  -3  -1   46.38    1.42 
 -10  -3  -1   41.61    1.46 
 -10  -3  -1   46.35    1.59 
 -10  -3  -1   45.25    1.50 
  10   3   1   44.47    1.59 
  10   3   1   46.06    1.44 
  10   3   1   46.14    1.56 
  10   3   1   45.26    1.33 
  10   3   1   45.77    1.29 
  10   3   1   45.28    1.48 
 -11  -3  -1   32.64    1.29 
 -11  -3  -1   33.63    1.33 
 -11  -3  -1   36.34    1.42 
  11   3   1   32.83    1.24 
  11   3   1   33.04    1.29 
  11   3   1   33.07    1.38 
  11   3   1   32.13    1.36 
  11   3   1   34.74    1.16 
 -12  -3  -1    2.16    0.54 
 -12  -3  -1    1.64    0.53 
 -12  -3  -1    1.39    0.58 
  12   3   1    0.60    0.47 
  12   3   1    0.54    0.41 
  12   3   1    1.41    0.52 
  12   3   1    0.79    0.53 
  12   3   1    1.18    0.41 
 -13  -3  -1    3.68    0.71 
 -13  -3  -1    4.16    0.71 
 -13  -3  -1    3.08    0.64 
 -13  -3  -1    5.01    0.71 
  13   3   1    3.56    0.72 
  13   3   1    3.16    0.51 
  13   3   1    3.72    0.55 
  13   3   1    3.38    0.64 
  13   3   1    4.46    0.73 
 -14  -3  -1    1.10    0.66 
 -14  -3  -1    1.87    0.61 
 -14  -3  -1    2.22    0.63 
 -14  -3  -1    2.97    0.70 
  14   3   1    1.93    0.52 
  14   3   1    2.52    0.67 
  14   3   1    2.10    0.64 
  14   3   1    1.42    0.67 
  14   3   1    1.30    0.51 
 -15  -3  -1    2.90    0.82 
 -15  -3  -1    2.72    0.73 
 -15  -3  -1    3.12    0.71 
 -15  -3  -1    2.61    0.77 
  15   3   1    2.65    0.75 
  15   3   1    2.98    0.64 
  15   3   1    3.82    0.75 
  15   3   1    2.67    0.57 
  15   3   1    3.01    0.74 
  14  -4  -1   20.66    1.38 
  14  -4  -1   20.82    1.38 
  14  -4  -1   23.45    1.23 
  14  -4  -1   22.20    1.24 
 -14   4   1   21.92    1.39 
 -14   4   1   22.05    1.43 
  13  -4  -1   25.95    1.43 
  13  -4  -1   29.67    1.34 
  13  -4  -1   28.53    1.48 
  13  -4  -1   28.76    1.36 
  13  -4  -1   26.24    1.26 
 -13   4   1   27.79    1.55 
 -13   4   1   27.09    1.40 
 -13   4   1   27.00    1.51 
  12  -4  -1    1.05    0.45 
  12  -4  -1    1.38    0.60 
  12  -4  -1    0.89    0.56 
  12  -4  -1    0.72    0.48 
  12  -4  -1    1.02    0.48 
 -12   4   1    0.98    0.64 
 -12   4   1    0.73    0.51 
 -12   4   1    0.85    0.54 
  11  -4  -1    2.41    0.54 
  11  -4  -1    2.17    0.56 
  11  -4  -1    2.31    0.50 
  11  -4  -1    2.36    0.60 
  11  -4  -1    2.92    0.51 
 -11   4   1    3.10    0.64 
 -11   4   1    3.79    0.63 
 -11   4   1    3.43    0.68 
  10  -4  -1   15.74    0.99 
  10  -4  -1   16.27    0.89 
  10  -4  -1   16.70    0.99 
  10  -4  -1   16.03    0.90 
  10  -4  -1   15.57    0.83 
  10  -4  -1   16.19    0.89 
 -10   4   1   16.89    1.00 
 -10   4   1   17.75    0.97 
 -10   4   1   17.47    1.08 
   9  -4  -1   37.95    1.30 
   9  -4  -1   37.08    1.40 
   9  -4  -1   39.76    1.31 
   9  -4  -1   38.97    1.35 
   9  -4  -1   38.86    1.34 
   9  -4  -1   40.54    1.45 
  -9   4   1   39.75    1.42 
  -9   4   1   37.56    1.48 
  -9   4   1   38.72    1.40 
   8  -4  -1   10.59    0.67 
   8  -4  -1   10.26    0.66 
   8  -4  -1   10.71    0.76 
   8  -4  -1   10.82    0.74 
   8  -4  -1    9.99    0.64 
   8  -4  -1   10.82    0.66 
  -8   4   1   10.27    0.52 
  -8   4   1    9.84    0.73 
  -8   4   1    9.49    0.69 
  -8   4   1   10.62    0.76 
   7  -4  -1    8.94    0.68 
   7  -4  -1    8.21    0.54 
   7  -4  -1    7.78    0.63 
   7  -4  -1    7.65    0.55 
   7  -4  -1    7.52    0.55 
   7  -4  -1    6.95    0.58 
  -7   4   1    7.55    0.44 
  -7   4   1    8.12    0.70 
  -7   4   1    7.94    0.62 
  -7   4   1    7.59    0.60 
   6  -4  -1    1.05    0.33 
   6  -4  -1    1.35    0.30 
   6  -4  -1    0.96    0.27 
   6  -4  -1    0.88    0.25 
   6  -4  -1    1.67    0.36 
   6  -4  -1    0.93    0.28 
  -6   4   1    0.45    0.22 
  -6   4   1    1.15    0.34 
  -6   4   1    0.98    0.25 
  -6   4   1    1.02    0.29 
  -6   4   1    0.77    0.20 
  -6   4   1    0.87    0.31 
   5  -4  -1    3.03    0.33 
   5  -4  -1    3.28    0.34 
   5  -4  -1    3.17    0.38 
   5  -4  -1    2.80    0.34 
   5  -4  -1    2.40    0.30 
   5  -4  -1    3.44    0.43 
   5  -4  -1    2.96    0.35 
  -5   4   1    3.12    0.38 
  -5   4   1    3.13    0.31 
  -5   4   1    2.59    0.34 
  -5   4   1    2.48    0.37 
  -5   4   1    2.34    0.29 
  -5   4   1    2.72    0.33 
   4  -4  -1   19.88    0.67 
   4  -4  -1   20.37    0.67 
   4  -4  -1   18.66    0.71 
   4  -4  -1   19.68    0.68 
   4  -4  -1   19.68    0.56 
   4  -4  -1   18.83    0.66 
   4  -4  -1   22.36    0.73 
   4  -4  -1   19.23    0.75 
  -4   4   1   19.02    0.71 
  -4   4   1   19.11    0.72 
  -4   4   1   20.02    0.66 
  -4   4   1   19.16    0.66 
  -4   4   1   19.42    0.69 
  -4   4   1   19.16    0.71 
  -4   4   1   20.43    0.68 
   3  -4  -1    4.31    0.38 
   3  -4  -1    4.94    0.34 
   3  -4  -1    4.24    0.38 
   3  -4  -1    3.83    0.30 
   3  -4  -1    3.20    0.28 
   3  -4  -1    3.84    0.24 
   3  -4  -1    4.06    0.31 
   3  -4  -1    3.88    0.28 
  -3   4   1    4.18    0.32 
  -3   4   1    4.06    0.32 
  -3   4   1    4.16    0.33 
  -3   4   1    4.92    0.38 
  -3   4   1    3.73    0.29 
  -3   4   1    4.55    0.37 
  -3   4   1    4.50    0.32 
   2  -4  -1  161.01    3.60 
   2  -4  -1  165.10    3.53 
   2  -4  -1  164.70    3.55 
   2  -4  -1  160.01    3.44 
   2  -4  -1  167.03    3.59 
   2  -4  -1  163.74    3.59 
   2  -4  -1  168.24    3.43 
   2  -4  -1  160.51    3.59 
  -2   4   1  162.56    3.52 
  -2   4   1  158.98    3.58 
  -2   4   1  158.56    3.45 
  -2   4   1  160.48    3.36 
  -2   4   1  155.50    3.42 
  -2   4   1  163.08    3.49 
  -2   4   1  158.67    3.58 
   1  -4  -1   84.63    1.91 
   1  -4  -1   83.76    1.91 
   1  -4  -1   82.09    1.83 
   1  -4  -1   78.18    1.89 
   1  -4  -1   82.39    1.89 
   1  -4  -1   81.55    1.94 
   1  -4  -1   81.36    1.84 
  -1   4   1   83.51    1.83 
  -1   4   1   84.12    1.90 
  -1   4   1   81.81    1.87 
  -1   4   1   83.62    1.83 
  -1   4   1   82.73    1.90 
  -1   4   1   83.43    1.85 
  -1   4   1   81.85    1.87 
  -1   4   1   80.49    1.88 
   0  -4  -1   29.75    0.73 
   0  -4  -1   30.67    0.82 
   0  -4  -1   30.03    0.78 
   0  -4  -1   29.27    0.78 
   0  -4  -1   28.01    0.83 
   0  -4  -1   28.78    0.77 
   0  -4  -1   28.08    0.82 
   0   4   1   28.29    0.78 
   0   4   1   29.74    0.78 
   0   4   1   29.99    0.77 
   0   4   1   28.55    0.76 
   0   4   1   29.28    0.79 
   0   4   1   28.45    0.77 
   0   4   1   28.50    0.75 
  -1  -4  -1    4.91    0.25 
  -1  -4  -1    5.51    0.34 
  -1  -4  -1    5.17    0.29 
  -1  -4  -1    5.28    0.30 
  -1  -4  -1    5.25    0.30 
  -1  -4  -1    5.13    0.24 
  -1  -4  -1    4.98    0.31 
   1   4   1    5.04    0.27 
   1   4   1    4.80    0.26 
   1   4   1    4.94    0.28 
   1   4   1    4.94    0.27 
   1   4   1    5.09    0.25 
   1   4   1    5.01    0.27 
   1   4   1    4.87    0.27 
  -2  -4  -1  250.30    5.26 
  -2  -4  -1  247.20    5.09 
  -2  -4  -1  261.78    5.56 
  -2  -4  -1  249.53    5.34 
  -2  -4  -1  252.17    5.29 
  -2  -4  -1  245.27    5.17 
  -2  -4  -1  249.22    5.14 
   2   4   1  254.26    4.95 
   2   4   1  247.30    5.47 
   2   4   1  253.59    5.34 
   2   4   1  248.25    5.07 
   2   4   1  242.62    5.16 
   2   4   1  245.46    5.28 
   2   4   1  248.08    5.14 
  -3  -4  -1  579.69   12.02 
  -3  -4  -1  602.29   12.25 
  -3  -4  -1  575.79   11.76 
  -3  -4  -1  567.93   11.61 
  -3  -4  -1  604.65   12.60 
  -3  -4  -1  564.66   12.23 
   3   4   1  587.43   11.76 
   3   4   1  591.21   12.24 
   3   4   1  581.30   12.07 
   3   4   1  565.11   11.84 
   3   4   1  584.96   12.55 
   3   4   1  568.96   11.60 
   3   4   1  591.69   11.26 
  -4  -4  -1  129.65    2.91 
  -4  -4  -1  128.14    2.83 
  -4  -4  -1  129.01    2.77 
  -4  -4  -1  130.53    3.07 
  -4  -4  -1  127.58    2.91 
  -4  -4  -1  128.19    2.91 
   4   4   1  130.23    3.05 
   4   4   1  130.68    2.63 
   4   4   1  132.68    2.90 
   4   4   1  127.86    2.82 
   4   4   1  128.77    2.87 
   4   4   1  132.57    2.75 
   4   4   1  126.05    2.94 
  -5  -4  -1  182.86    4.11 
  -5  -4  -1  179.12    3.97 
  -5  -4  -1  191.64    4.29 
  -5  -4  -1  180.37    3.99 
  -5  -4  -1  182.15    4.08 
  -5  -4  -1  187.37    3.91 
  -5  -4  -1  182.16    4.12 
   5   4   1  179.70    4.12 
   5   4   1  187.98    3.98 
   5   4   1  190.67    4.29 
   5   4   1  184.58    3.86 
   5   4   1  183.49    3.85 
   5   4   1  185.21    3.66 
   5   4   1  182.21    4.03 
   5   4   1  186.28    4.03 
   5   4   1  194.58    4.09 
  -6  -4  -1   20.84    0.75 
  -6  -4  -1   21.41    0.82 
  -6  -4  -1   21.32    0.76 
  -6  -4  -1   21.41    0.80 
  -6  -4  -1   21.86    0.72 
  -6  -4  -1   21.31    0.76 
  -6  -4  -1   20.59    0.74 
   6   4   1   21.11    0.57 
   6   4   1   20.81    0.79 
   6   4   1   21.43    0.67 
   6   4   1   21.81    0.84 
   6   4   1   21.90    0.76 
   6   4   1   22.17    0.76 
   6   4   1   22.79    0.85 
   6   4   1   21.99    0.52 
   6   4   1   22.52    0.71 
  -7  -4  -1    5.50    0.42 
  -7  -4  -1    6.34    0.53 
  -7  -4  -1    5.72    0.46 
  -7  -4  -1    5.33    0.41 
  -7  -4  -1    4.91    0.46 
  -7  -4  -1    5.68    0.47 
  -7  -4  -1    6.28    0.54 
   7   4   1    6.01    0.54 
   7   4   1    4.87    0.27 
   7   4   1    5.19    0.52 
   7   4   1    5.31    0.43 
   7   4   1    4.80    0.38 
   7   4   1    5.54    0.45 
  -8  -4  -1   -0.07    0.24 
  -8  -4  -1   -0.30    0.29 
  -8  -4  -1    0.21    0.26 
  -8  -4  -1   -0.14    0.24 
  -8  -4  -1    0.04    0.28 
   8   4   1   -0.11    0.29 
   8   4   1    0.06    0.27 
   8   4   1   -0.13    0.24 
   8   4   1    0.00    0.20 
   8   4   1    0.33    0.32 
   8   4   1   -0.14    0.15 
  -9  -4  -1   19.15    0.91 
  -9  -4  -1   17.90    0.89 
  -9  -4  -1   18.93    0.87 
  -9  -4  -1   18.32    0.84 
  -9  -4  -1   18.39    0.85 
   9   4   1   17.45    0.63 
   9   4   1   16.97    0.91 
   9   4   1   17.83    0.83 
   9   4   1   17.84    0.83 
   9   4   1   17.88    0.73 
   9   4   1   17.28    0.90 
 -10  -4  -1   78.92    2.27 
 -10  -4  -1   79.97    2.22 
 -10  -4  -1   79.68    2.21 
 -10  -4  -1   80.94    2.23 
 -10  -4  -1   80.74    2.29 
  10   4   1   80.29    2.31 
  10   4   1   80.45    2.18 
  10   4   1   78.39    2.14 
  10   4   1   81.15    2.38 
  10   4   1   79.90    2.02 
 -11  -4  -1   27.32    1.23 
 -11  -4  -1   25.74    1.16 
 -11  -4  -1   27.99    1.22 
 -11  -4  -1   26.21    1.14 
  11   4   1   27.06    1.25 
  11   4   1   26.56    1.01 
  11   4   1   27.98    1.27 
  11   4   1   25.66    1.13 
  11   4   1   25.53    1.10 
 -12  -4  -1    1.20    0.53 
 -12  -4  -1    1.69    0.52 
 -12  -4  -1    1.07    0.53 
 -12  -4  -1    1.45    0.47 
  12   4   1    1.37    0.41 
  12   4   1    1.32    0.52 
  12   4   1    1.33    0.52 
  12   4   1    0.59    0.52 
  12   4   1    0.76    0.44 
 -13  -4  -1   -0.24    0.43 
 -13  -4  -1    0.19    0.53 
 -13  -4  -1   -0.16    0.48 
 -13  -4  -1    0.28    0.49 
  13   4   1   -0.83    0.44 
  13   4   1    0.40    0.39 
  13   4   1   -0.13    0.45 
  13   4   1    0.37    0.52 
  13   4   1   -0.29    0.36 
 -14  -4  -1    0.83    0.50 
 -14  -4  -1    0.56    0.52 
 -14  -4  -1    0.33    0.61 
 -14  -4  -1   -0.35    0.53 
  14   4   1    0.76    0.58 
  14   4   1   -1.14    0.46 
  14   4   1    0.89    0.45 
  14   4   1    0.24    0.54 
  14   4   1    0.05    0.47 
 -15  -4  -1    0.97    0.69 
 -15  -4  -1    0.21    0.54 
 -15  -4  -1    0.02    0.65 
 -15  -4  -1    0.23    0.56 
  15   4   1   -0.47    0.56 
  15   4   1   -0.21    0.57 
  15   4   1    0.36    0.47 
  15   4   1    0.00    0.48 
  15   4   1    0.42    0.59 
 -16  -4  -1    2.65    0.81 
 -16  -4  -1    2.50    0.76 
 -16  -4  -1    3.49    0.79 
 -16  -4  -1    2.98    0.70 
  16   4   1    3.30    0.63 
  16   4   1    3.85    0.78 
  16   4   1    2.64    0.56 
  16   4   1    3.09    0.81 
  16   4   1    2.18    0.71 
  13  -5  -1   13.73    0.97 
  13  -5  -1   11.58    1.13 
  13  -5  -1   11.70    1.13 
  13  -5  -1   11.15    0.93 
 -13   5   1    9.29    1.01 
 -13   5   1    9.62    1.12 
  12  -5  -1    3.38    0.75 
  12  -5  -1    3.58    0.67 
  12  -5  -1    3.85    0.79 
  12  -5  -1    2.27    0.58 
  12  -5  -1    2.89    0.57 
 -12   5   1    1.92    0.66 
 -12   5   1    2.84    0.75 
 -12   5   1    3.26    0.68 
 -12   5   1    2.32    0.57 
  11  -5  -1    0.56    0.42 
  11  -5  -1    0.30    0.44 
  11  -5  -1    0.35    0.56 
  11  -5  -1   -0.01    0.55 
  11  -5  -1    0.34    0.43 
 -11   5   1    0.26    0.46 
 -11   5   1    0.14    0.49 
 -11   5   1    0.98    0.56 
 -11   5   1    0.88    0.45 
  10  -5  -1   13.17    0.99 
  10  -5  -1   13.62    0.89 
  10  -5  -1   14.11    0.85 
  10  -5  -1   13.69    0.87 
  10  -5  -1   14.39    0.98 
 -10   5   1   16.34    1.04 
 -10   5   1   15.00    0.97 
 -10   5   1   13.46    0.95 
   9  -5  -1   48.32    1.67 
   9  -5  -1   46.74    1.69 
   9  -5  -1   47.97    1.53 
   9  -5  -1   50.45    1.59 
   9  -5  -1   49.41    1.55 
  -9   5   1   48.74    1.66 
  -9   5   1   48.96    1.65 
  -9   5   1   49.42    1.75 
   8  -5  -1    1.10    0.33 
   8  -5  -1    0.61    0.36 
   8  -5  -1    0.72    0.42 
   8  -5  -1    0.60    0.36 
   8  -5  -1    0.46    0.45 
   8  -5  -1    1.26    0.35 
  -8   5   1    0.99    0.36 
  -8   5   1    0.38    0.40 
  -8   5   1    1.01    0.41 
  -8   5   1    0.59    0.25 
  -8   5   1    0.49    0.37 
   7  -5  -1    2.51    0.41 
   7  -5  -1    2.69    0.39 
   7  -5  -1    2.18    0.36 
   7  -5  -1    2.47    0.48 
   7  -5  -1    2.69    0.40 
   7  -5  -1    2.75    0.49 
  -7   5   1    2.45    0.39 
  -7   5   1    1.78    0.32 
  -7   5   1    2.30    0.43 
  -7   5   1    2.12    0.46 
  -7   5   1    2.60    0.43 
   6  -5  -1   13.18    0.63 
   6  -5  -1   13.08    0.72 
   6  -5  -1   12.80    0.65 
   6  -5  -1   13.72    0.62 
   6  -5  -1   12.22    0.72 
   6  -5  -1   13.86    0.67 
  -6   5   1   12.35    0.59 
  -6   5   1   12.39    0.68 
  -6   5   1   13.85    0.73 
  -6   5   1   14.12    0.75 
  -6   5   1   12.83    0.69 
  -6   5   1   12.61    0.64 
   5  -5  -1   10.78    0.63 
   5  -5  -1   11.28    0.55 
   5  -5  -1   11.72    0.58 
   5  -5  -1   11.50    0.58 
   5  -5  -1   11.07    0.53 
   5  -5  -1   11.69    0.63 
   5  -5  -1   10.73    0.58 
   5  -5  -1   11.04    0.38 
  -5   5   1   10.39    0.60 
  -5   5   1   11.43    0.55 
  -5   5   1   11.72    0.61 
  -5   5   1   11.74    0.57 
  -5   5   1   11.38    0.63 
  -5   5   1   10.52    0.56 
  -5   5   1   11.61    0.57 
   4  -5  -1   11.33    0.49 
   4  -5  -1   11.85    0.53 
   4  -5  -1   12.36    0.56 
   4  -5  -1   11.73    0.42 
   4  -5  -1   11.52    0.54 
   4  -5  -1   11.55    0.56 
   4  -5  -1   11.58    0.61 
   4  -5  -1   11.49    0.59 
  -4   5   1   11.07    0.53 
  -4   5   1   11.38    0.53 
  -4   5   1   11.39    0.58 
  -4   5   1   10.55    0.52 
  -4   5   1   11.89    0.58 
  -4   5   1   10.98    0.56 
  -4   5   1   10.71    0.53 
   3  -5  -1    5.42    0.38 
   3  -5  -1    5.09    0.45 
   3  -5  -1    5.19    0.37 
   3  -5  -1    5.67    0.38 
   3  -5  -1    5.91    0.47 
   3  -5  -1    5.09    0.32 
   3  -5  -1    4.77    0.30 
   3  -5  -1    5.64    0.39 
  -3   5   1    4.29    0.36 
  -3   5   1    4.91    0.37 
  -3   5   1    4.64    0.35 
  -3   5   1    5.23    0.36 
  -3   5   1    4.64    0.36 
  -3   5   1    5.00    0.40 
  -3   5   1    5.29    0.38 
   2  -5  -1  100.74    2.35 
   2  -5  -1   97.11    2.31 
   2  -5  -1  100.58    2.24 
   2  -5  -1  102.49    2.28 
   2  -5  -1   99.44    2.34 
   2  -5  -1   99.22    2.33 
   2  -5  -1   97.57    2.24 
  -2   5   1   97.43    2.23 
  -2   5   1   98.65    2.30 
  -2   5   1   96.47    2.30 
  -2   5   1   99.42    2.32 
  -2   5   1   98.44    2.25 
  -2   5   1   99.48    2.28 
  -2   5   1   96.21    2.21 
   1  -5  -1   83.23    2.00 
   1  -5  -1   81.35    1.98 
   1  -5  -1   83.49    1.93 
   1  -5  -1   84.98    2.01 
   1  -5  -1   84.26    1.94 
   1  -5  -1   86.21    1.97 
   1  -5  -1   86.02    1.95 
  -1   5   1   85.62    1.95 
  -1   5   1   87.29    1.93 
  -1   5   1   85.11    1.99 
  -1   5   1   83.18    1.97 
  -1   5   1   84.85    1.93 
  -1   5   1   83.91    1.94 
  -1   5   1   86.83    1.98 
   0  -5  -1   67.61    1.59 
   0  -5  -1   68.91    1.64 
   0  -5  -1   68.32    1.61 
   0  -5  -1   67.49    1.70 
   0  -5  -1   67.35    1.58 
   0  -5  -1   68.39    1.56 
   0  -5  -1   64.24    1.68 
   0   5   1   67.19    1.60 
   0   5   1   66.53    1.55 
   0   5   1   65.40    1.61 
   0   5   1   68.18    1.58 
   0   5   1   67.43    1.58 
   0   5   1   68.92    1.61 
   0   5   1   67.30    1.59 
  -1  -5  -1    7.15    0.38 
  -1  -5  -1    7.75    0.33 
  -1  -5  -1    6.91    0.39 
  -1  -5  -1    7.46    0.43 
  -1  -5  -1    7.53    0.39 
  -1  -5  -1    7.48    0.39 
  -1  -5  -1    7.33    0.34 
  -1  -5  -1    7.29    0.43 
   1   5   1    7.58    0.38 
   1   5   1    7.55    0.34 
   1   5   1    7.73    0.37 
   1   5   1    7.56    0.34 
   1   5   1    7.24    0.36 
   1   5   1    7.60    0.36 
   1   5   1    7.65    0.38 
  -2  -5  -1   70.62    1.59 
  -2  -5  -1   68.41    1.64 
  -2  -5  -1   67.18    1.64 
  -2  -5  -1   69.13    1.54 
  -2  -5  -1   70.37    1.58 
  -2  -5  -1   69.82    1.79 
  -2  -5  -1   67.57    1.60 
   2   5   1   67.46    1.67 
   2   5   1   68.37    1.56 
   2   5   1   69.58    1.63 
   2   5   1   69.15    1.60 
   2   5   1   68.13    1.57 
   2   5   1   67.17    1.59 
   2   5   1   69.18    1.65 
  -3  -5  -1  155.52    3.28 
  -3  -5  -1  151.44    3.44 
  -3  -5  -1  156.54    3.36 
  -3  -5  -1  157.59    3.66 
  -3  -5  -1  159.45    3.31 
  -3  -5  -1  155.71    3.43 
  -3  -5  -1  158.04    3.40 
   3   5   1  154.94    3.46 
   3   5   1  154.69    3.36 
   3   5   1  162.41    3.45 
   3   5   1  154.24    3.56 
   3   5   1  153.11    3.28 
   3   5   1  153.70    3.21 
   3   5   1  155.72    3.35 
  -4  -5  -1  297.71    6.61 
  -4  -5  -1  282.88    6.12 
  -4  -5  -1  290.05    6.26 
  -4  -5  -1  295.58    6.03 
  -4  -5  -1  299.82    6.32 
  -4  -5  -1  290.07    6.33 
   4   5   1  295.07    6.01 
   4   5   1  290.93    6.31 
   4   5   1  292.55    6.16 
   4   5   1  300.24    6.33 
   4   5   1  294.92    5.82 
   4   5   1  292.34    6.12 
   4   5   1  298.40    6.55 
  -5  -5  -1  269.16    5.94 
  -5  -5  -1  255.51    5.50 
  -5  -5  -1  262.42    5.68 
  -5  -5  -1  261.76    5.41 
  -5  -5  -1  259.76    5.64 
  -5  -5  -1  253.60    5.51 
  -5  -5  -1  259.85    5.69 
   5   5   1  255.23    5.54 
   5   5   1  260.18    5.37 
   5   5   1  271.43    5.91 
   5   5   1  258.72    5.69 
   5   5   1  254.73    5.49 
   5   5   1  260.36    5.16 
   5   5   1  264.32    5.66 
  -6  -5  -1    4.23    0.34 
  -6  -5  -1    5.26    0.49 
  -6  -5  -1    4.46    0.43 
  -6  -5  -1    4.34    0.39 
  -6  -5  -1    3.96    0.37 
  -6  -5  -1    4.35    0.40 
  -6  -5  -1    5.00    0.41 
   6   5   1    4.67    0.34 
   6   5   1    3.72    0.37 
   6   5   1    3.90    0.18 
   6   5   1    3.97    0.23 
   6   5   1    4.78    0.48 
   6   5   1    3.77    0.31 
   6   5   1    3.84    0.42 
   6   5   1    4.33    0.42 
  -7  -5  -1   42.71    1.27 
  -7  -5  -1   45.78    1.41 
  -7  -5  -1   42.71    1.32 
  -7  -5  -1   44.75    1.22 
  -7  -5  -1   44.38    1.28 
  -7  -5  -1   42.13    1.28 
  -7  -5  -1   44.21    1.29 
   7   5   1   42.83    1.37 
   7   5   1   43.66    1.32 
   7   5   1   46.04    1.42 
   7   5   1   44.52    1.03 
   7   5   1   41.49    1.27 
   7   5   1   43.85    1.27 
   7   5   1   44.64    1.18 
   7   5   1   44.62    1.26 
   7   5   1   43.37    0.98 
  -8  -5  -1    0.13    0.29 
  -8  -5  -1   -0.24    0.29 
  -8  -5  -1    0.23    0.30 
  -8  -5  -1   -0.05    0.28 
  -8  -5  -1    0.49    0.29 
   8   5   1   -0.01    0.15 
   8   5   1    0.15    0.22 
   8   5   1    0.36    0.28 
   8   5   1    0.37    0.29 
   8   5   1    0.02    0.33 
   8   5   1   -0.22    0.25 
  -9  -5  -1   58.72    1.73 
  -9  -5  -1   61.45    1.76 
  -9  -5  -1   59.27    1.78 
  -9  -5  -1   62.66    1.85 
  -9  -5  -1   59.98    1.78 
   9   5   1   60.18    1.58 
   9   5   1   58.78    1.83 
   9   5   1   59.04    1.87 
   9   5   1   60.49    1.71 
   9   5   1   61.87    1.72 
 -10  -5  -1   66.55    1.98 
 -10  -5  -1   65.84    1.93 
 -10  -5  -1   68.26    2.00 
 -10  -5  -1   68.51    2.02 
 -10  -5  -1   65.99    1.93 
  10   5   1   65.35    1.88 
  10   5   1   63.69    2.02 
  10   5   1   65.46    1.74 
  10   5   1   64.18    2.07 
  10   5   1   67.99    1.89 
 -11  -5  -1   -0.33    0.43 
 -11  -5  -1    0.36    0.47 
 -11  -5  -1    0.30    0.41 
 -11  -5  -1    0.41    0.43 
 -11  -5  -1    0.73    0.41 
  11   5   1   -0.26    0.38 
  11   5   1   -0.16    0.38 
  11   5   1    0.19    0.33 
  11   5   1    0.14    0.41 
  11   5   1   -0.15    0.43 
 -12  -5  -1    0.72    0.48 
 -12  -5  -1    0.02    0.44 
 -12  -5  -1    0.61    0.45 
 -12  -5  -1    0.57    0.51 
  12   5   1    0.90    0.48 
  12   5   1    0.72    0.54 
  12   5   1    0.38    0.37 
  12   5   1    0.80    0.47 
  12   5   1    0.53    0.43 
 -13  -5  -1   -0.37    0.46 
 -13  -5  -1    0.81    0.54 
 -13  -5  -1    0.31    0.46 
 -13  -5  -1   -0.12    0.51 
  13   5   1    0.33    0.38 
  13   5   1   -0.19    0.46 
  13   5   1    0.08    0.53 
  13   5   1   -0.35    0.48 
  13   5   1    0.82    0.43 
 -14  -5  -1    2.65    0.66 
 -14  -5  -1    2.87    0.68 
 -14  -5  -1    2.79    0.74 
 -14  -5  -1    2.99    0.68 
  14   5   1    1.45    0.59 
  14   5   1    1.92    0.55 
  14   5   1    2.53    0.68 
  14   5   1    2.33    0.53 
  14   5   1    2.48    0.71 
 -15  -5  -1    9.97    1.02 
 -15  -5  -1    6.76    0.95 
 -15  -5  -1    6.97    0.95 
 -15  -5  -1    5.81    0.85 
  15   5   1    7.17    0.74 
  15   5   1    7.27    0.97 
  15   5   1    7.13    0.87 
  15   5   1    8.50    1.02 
  15   5   1    6.83    0.80 
 -16  -5  -1   12.48    1.16 
 -16  -5  -1   12.65    1.23 
 -16  -5  -1   12.20    1.22 
 -16  -5  -1   10.34    1.03 
  16   5   1    9.64    1.14 
  16   5   1   12.79    1.21 
  16   5   1   12.14    0.92 
  16   5   1   11.76    1.06 
  16   5   1   13.38    1.02 
  13  -6  -1    3.38    0.83 
  13  -6  -1    2.01    0.53 
  13  -6  -1    3.95    0.69 
  13  -6  -1    1.28    0.63 
 -13   6   1    3.33    0.73 
 -13   6   1    2.18    0.78 
  12  -6  -1    0.30    0.41 
  12  -6  -1   -0.09    0.47 
  12  -6  -1   -0.60    0.52 
  12  -6  -1    0.06    0.61 
  12  -6  -1    0.58    0.53 
 -12   6   1   -0.27    0.51 
 -12   6   1   -0.71    0.57 
  11  -6  -1    0.52    0.55 
  11  -6  -1    0.24    0.46 
  11  -6  -1    0.74    0.48 
  11  -6  -1    1.18    0.63 
  11  -6  -1   -0.38    0.39 
 -11   6   1    0.15    0.44 
 -11   6   1    0.54    0.52 
 -11   6   1   -0.01    0.51 
 -11   6   1    0.25    0.53 
  10  -6  -1   27.32    1.21 
  10  -6  -1   24.24    1.16 
  10  -6  -1   23.94    1.29 
  10  -6  -1   26.70    1.34 
  10  -6  -1   26.44    1.16 
 -10   6   1   23.24    1.30 
 -10   6   1   26.85    1.28 
 -10   6   1   23.88    1.25 
 -10   6   1   27.97    1.21 
   9  -6  -1    8.47    0.72 
   9  -6  -1    6.86    0.64 
   9  -6  -1    7.99    0.84 
   9  -6  -1    7.38    0.71 
   9  -6  -1    7.65    0.82 
  -9   6   1    8.51    0.88 
  -9   6   1    7.99    0.74 
  -9   6   1    7.88    0.78 
  -9   6   1    8.34    0.73 
   8  -6  -1   11.59    0.76 
   8  -6  -1   14.27    0.80 
   8  -6  -1   12.51    0.87 
   8  -6  -1   11.17    0.74 
   8  -6  -1   11.59    0.87 
  -8   6   1   12.81    0.85 
  -8   6   1   11.31    0.66 
  -8   6   1   11.14    0.83 
  -8   6   1   12.34    0.81 
  -8   6   1   11.93    0.75 
   7  -6  -1    8.93    0.64 
   7  -6  -1    9.51    0.65 
   7  -6  -1   10.03    0.77 
   7  -6  -1    9.30    0.80 
   7  -6  -1    8.53    0.62 
  -7   6   1    8.48    0.69 
  -7   6   1    9.30    0.71 
  -7   6   1    9.46    0.65 
  -7   6   1    8.83    0.67 
  -7   6   1    8.28    0.55 
   6  -6  -1   14.56    0.71 
   6  -6  -1   14.18    0.82 
   6  -6  -1   14.09    0.81 
   6  -6  -1   14.58    0.64 
   6  -6  -1   15.07    0.73 
   6  -6  -1   15.11    0.75 
  -6   6   1   14.22    0.77 
  -6   6   1   14.71    0.73 
  -6   6   1   14.44    0.78 
  -6   6   1   13.93    0.67 
  -6   6   1   15.15    0.78 
   5  -6  -1    3.06    0.48 
   5  -6  -1    2.43    0.43 
   5  -6  -1    2.68    0.40 
   5  -6  -1    2.56    0.32 
   5  -6  -1    2.57    0.37 
   5  -6  -1    3.30    0.38 
  -5   6   1    2.46    0.40 
  -5   6   1    2.53    0.38 
  -5   6   1    3.42    0.45 
  -5   6   1    2.75    0.36 
  -5   6   1    2.54    0.35 
  -5   6   1    3.20    0.39 
  -5   6   1    3.50    0.46 
   4  -6  -1    1.90    0.24 
   4  -6  -1    1.97    0.32 
   4  -6  -1    1.39    0.32 
   4  -6  -1    1.76    0.32 
   4  -6  -1    2.02    0.32 
   4  -6  -1    2.07    0.38 
   4  -6  -1    1.94    0.26 
   4  -6  -1    2.03    0.40 
  -4   6   1    1.85    0.31 
  -4   6   1    1.80    0.32 
  -4   6   1    2.40    0.32 
  -4   6   1    1.61    0.29 
  -4   6   1    1.65    0.30 
  -4   6   1    1.79    0.34 
  -4   6   1    1.94    0.36 
   3  -6  -1   91.61    2.13 
   3  -6  -1   90.40    2.27 
   3  -6  -1   93.52    2.14 
   3  -6  -1   88.75    2.15 
   3  -6  -1   90.41    2.14 
   3  -6  -1   90.46    2.23 
   3  -6  -1   90.24    2.24 
  -3   6   1   90.17    2.15 
  -3   6   1   85.84    2.18 
  -3   6   1   89.22    2.21 
  -3   6   1   87.62    2.17 
  -3   6   1   87.66    2.14 
  -3   6   1   88.44    2.21 
  -3   6   1   92.43    2.14 
   2  -6  -1   43.98    1.22 
   2  -6  -1   42.49    1.26 
   2  -6  -1   46.63    1.16 
   2  -6  -1   43.92    1.21 
   2  -6  -1   45.51    1.22 
   2  -6  -1   46.01    1.29 
   2  -6  -1   45.03    1.28 
   2  -6  -1   44.60    1.21 
  -2   6   1   46.54    1.22 
  -2   6   1   43.64    1.24 
  -2   6   1   45.74    1.24 
  -2   6   1   43.07    1.22 
  -2   6   1   42.30    1.20 
  -2   6   1   47.07    1.25 
  -2   6   1   45.80    1.21 
  -2   6   1   45.93    1.24 
   1  -6  -1   66.76    1.64 
   1  -6  -1   66.83    1.69 
   1  -6  -1   67.97    1.70 
   1  -6  -1   67.25    1.63 
   1  -6  -1   66.86    1.64 
   1  -6  -1   65.43    1.64 
  -1   6   1   67.29    1.62 
  -1   6   1   64.91    1.65 
  -1   6   1   65.04    1.65 
  -1   6   1   68.08    1.62 
  -1   6   1   68.20    1.65 
  -1   6   1   66.80    1.66 
  -1   6   1   66.88    1.64 
   0  -6  -1    0.20    0.19 
   0  -6  -1    0.37    0.18 
   0  -6  -1    0.27    0.16 
   0  -6  -1    0.78    0.22 
   0  -6  -1    0.45    0.24 
   0  -6  -1    0.26    0.22 
   0  -6  -1    0.75    0.21 
   0   6   1    0.75    0.21 
   0   6   1    0.51    0.18 
   0   6   1    0.56    0.17 
   0   6   1    0.72    0.18 
   0   6   1    0.53    0.21 
   0   6   1    0.59    0.18 
   0   6   1    0.57    0.18 
  -1  -6  -1   22.96    0.75 
  -1  -6  -1   24.84    0.85 
  -1  -6  -1   22.43    0.76 
  -1  -6  -1   23.28    0.83 
  -1  -6  -1   23.38    0.75 
  -1  -6  -1   23.62    0.75 
  -1  -6  -1   23.55    0.71 
  -1  -6  -1   23.45    0.67 
   1   6   1   24.09    0.75 
   1   6   1   22.28    0.72 
   1   6   1   23.75    0.71 
   1   6   1   22.90    0.71 
   1   6   1   22.67    0.72 
   1   6   1   23.31    0.71 
   1   6   1   21.78    0.73 
  -2  -6  -1   37.24    1.01 
  -2  -6  -1   34.28    0.92 
  -2  -6  -1   36.09    1.03 
  -2  -6  -1   36.22    1.01 
  -2  -6  -1   36.91    1.14 
  -2  -6  -1   35.80    0.95 
  -2  -6  -1   35.99    1.03 
   2   6   1   35.58    0.99 
   2   6   1   36.05    1.00 
   2   6   1   36.07    0.98 
   2   6   1   36.92    0.97 
   2   6   1   37.35    0.99 
   2   6   1   36.21    1.00 
   2   6   1   35.53    1.01 
  -3  -6  -1  114.40    2.53 
  -3  -6  -1  113.02    2.63 
  -3  -6  -1  110.74    2.47 
  -3  -6  -1  116.17    2.56 
  -3  -6  -1  113.66    2.58 
  -3  -6  -1  110.79    2.61 
  -3  -6  -1  115.94    2.84 
   3   6   1  112.12    2.69 
   3   6   1  117.14    2.58 
   3   6   1  113.37    2.51 
   3   6   1  117.97    2.62 
   3   6   1  112.74    2.64 
   3   6   1  112.65    2.55 
   3   6   1  113.70    2.48 
  -4  -6  -1   75.58    1.85 
  -4  -6  -1   77.18    1.80 
  -4  -6  -1   79.76    1.90 
  -4  -6  -1   79.64    2.07 
  -4  -6  -1   73.92    1.67 
  -4  -6  -1   75.16    1.79 
  -4  -6  -1   75.75    1.85 
   4   6   1   75.10    1.83 
   4   6   1   75.20    1.73 
   4   6   1   76.35    1.85 
   4   6   1   76.99    1.96 
   4   6   1   79.17    1.86 
   4   6   1   74.40    1.91 
   4   6   1   76.10    1.77 
  -5  -6  -1    3.85    0.35 
  -5  -6  -1    3.57    0.36 
  -5  -6  -1    3.25    0.31 
  -5  -6  -1    3.53    0.34 
  -5  -6  -1    4.04    0.46 
  -5  -6  -1    3.56    0.39 
   5   6   1    3.72    0.37 
   5   6   1    3.20    0.27 
   5   6   1    2.77    0.33 
   5   6   1    3.70    0.40 
   5   6   1    3.16    0.31 
   5   6   1    3.54    0.41 
   5   6   1    4.09    0.36 
  -6  -6  -1    1.16    0.34 
  -6  -6  -1    0.72    0.28 
  -6  -6  -1    0.92    0.26 
  -6  -6  -1    1.40    0.28 
  -6  -6  -1    0.86    0.24 
  -6  -6  -1    1.17    0.27 
  -6  -6  -1    0.84    0.22 
   6   6   1    1.04    0.29 
   6   6   1    1.25    0.18 
   6   6   1    0.19    0.28 
   6   6   1    1.08    0.22 
   6   6   1    1.21    0.23 
   6   6   1    1.09    0.27 
   6   6   1    0.76    0.29 
  -7  -6  -1    4.50    0.54 
  -7  -6  -1    4.53    0.41 
  -7  -6  -1    3.82    0.41 
  -7  -6  -1    4.31    0.42 
  -7  -6  -1    4.53    0.44 
  -7  -6  -1    4.50    0.48 
  -7  -6  -1    4.36    0.49 
   7   6   1    4.55    0.26 
   7   6   1    3.73    0.44 
   7   6   1    4.30    0.49 
   7   6   1    4.96    0.54 
   7   6   1    4.01    0.36 
   7   6   1    3.99    0.42 
  -8  -6  -1   15.49    0.78 
  -8  -6  -1   14.28    0.71 
  -8  -6  -1   16.40    0.85 
  -8  -6  -1   14.97    0.74 
  -8  -6  -1   14.13    0.72 
   8   6   1   15.07    0.82 
   8   6   1   14.62    0.64 
   8   6   1   15.25    0.75 
   8   6   1   15.40    0.83 
   8   6   1   14.74    0.79 
  -9  -6  -1   61.54    1.76 
  -9  -6  -1   61.53    1.89 
  -9  -6  -1   61.25    1.75 
  -9  -6  -1   58.80    1.74 
  -9  -6  -1   58.69    1.77 
   9   6   1   59.16    1.59 
   9   6   1   58.78    1.89 
   9   6   1   59.89    1.86 
   9   6   1   59.68    1.73 
 -10  -6  -1    3.77    0.58 
 -10  -6  -1    3.52    0.52 
 -10  -6  -1    2.65    0.50 
 -10  -6  -1    3.23    0.55 
 -10  -6  -1    3.11    0.54 
  10   6   1    3.10    0.48 
  10   6   1    4.07    0.54 
  10   6   1    2.30    0.39 
  10   6   1    2.42    0.52 
  10   6   1    3.03    0.55 
 -11  -6  -1   17.70    0.99 
 -11  -6  -1   16.97    0.96 
 -11  -6  -1   18.15    0.96 
 -11  -6  -1   16.33    0.97 
 -11  -6  -1   17.47    0.93 
  11   6   1   16.57    0.90 
  11   6   1   17.16    1.03 
  11   6   1   16.43    0.82 
  11   6   1   15.99    1.04 
  11   6   1   15.66    0.93 
 -12  -6  -1    0.20    0.41 
 -12  -6  -1    0.53    0.52 
 -12  -6  -1    0.46    0.44 
 -12  -6  -1    1.50    0.52 
 -12  -6  -1    0.16    0.46 
  12   6   1    0.69    0.44 
  12   6   1    0.02    0.35 
  12   6   1    0.26    0.44 
  12   6   1    0.75    0.53 
  12   6   1    0.82    0.52 
 -13  -6  -1    0.00    0.41 
 -13  -6  -1   -0.42    0.43 
 -13  -6  -1    0.48    0.54 
 -13  -6  -1   -0.36    0.46 
  13   6   1    0.21    0.37 
  13   6   1    0.59    0.58 
  13   6   1    0.20    0.45 
  13   6   1    0.32    0.49 
  13   6   1   -0.33    0.49 
 -14  -6  -1    1.75    0.58 
 -14  -6  -1    2.28    0.66 
 -14  -6  -1    0.72    0.57 
 -14  -6  -1    1.42    0.65 
  14   6   1    1.93    0.60 
  14   6   1    1.49    0.66 
  14   6   1    2.18    0.53 
  14   6   1    0.50    0.58 
  14   6   1    0.89    0.51 
 -15  -6  -1    8.95    1.02 
 -15  -6  -1    9.97    0.99 
 -15  -6  -1   10.04    1.01 
 -15  -6  -1   10.17    1.10 
  15   6   1    8.94    0.88 
  15   6   1    9.80    0.82 
  15   6   1    7.50    1.03 
  15   6   1    8.82    1.02 
  15   6   1    8.67    0.92 
 -16  -6  -1   19.46    1.38 
 -16  -6  -1   20.89    1.42 
 -16  -6  -1   22.12    1.37 
 -16  -6  -1   19.32    1.33 
  16   6   1   19.84    1.37 
  16   6   1   18.27    1.09 
  16   6   1   17.77    1.20 
  16   6   1   19.04    1.19 
  16   6   1   18.61    1.39 
  12  -7  -1    1.21    0.58 
  12  -7  -1    2.02    0.55 
  12  -7  -1    1.67    0.68 
  12  -7  -1    2.10    0.77 
 -12   7   1    3.07    0.69 
 -12   7   1    2.10    0.78 
  11  -7  -1    9.71    0.90 
  11  -7  -1    9.39    0.93 
  11  -7  -1   10.85    1.13 
  11  -7  -1    9.58    0.92 
  11  -7  -1    9.37    1.06 
 -11   7   1    8.75    0.94 
 -11   7   1    8.96    1.01 
  10  -7  -1   10.95    1.06 
  10  -7  -1    9.28    0.83 
  10  -7  -1   10.58    1.05 
  10  -7  -1   11.25    0.94 
  10  -7  -1    9.55    0.87 
 -10   7   1   10.97    0.85 
 -10   7   1   11.33    0.99 
 -10   7   1    9.89    0.99 
 -10   7   1   11.65    1.01 
   9  -7  -1    0.33    0.42 
   9  -7  -1   -0.07    0.37 
   9  -7  -1    0.24    0.56 
   9  -7  -1   -0.96    0.44 
   9  -7  -1    1.03    0.45 
  -9   7   1    0.12    0.39 
  -9   7   1    0.41    0.38 
  -9   7   1   -0.23    0.46 
  -9   7   1    0.00    0.47 
   8  -7  -1    0.39    0.38 
   8  -7  -1    0.30    0.48 
   8  -7  -1    0.20    0.48 
   8  -7  -1    0.11    0.39 
   8  -7  -1    0.48    0.32 
  -8   7   1    0.54    0.44 
  -8   7   1    0.11    0.32 
  -8   7   1   -0.08    0.34 
  -8   7   1    0.41    0.41 
  -8   7   1    0.28    0.37 
   7  -7  -1    0.70    0.34 
   7  -7  -1    0.92    0.41 
   7  -7  -1    0.75    0.47 
   7  -7  -1    0.66    0.44 
   7  -7  -1    1.03    0.38 
  -7   7   1    1.77    0.46 
  -7   7   1    0.52    0.42 
  -7   7   1    1.13    0.38 
  -7   7   1    1.81    0.37 
  -7   7   1    1.00    0.40 
   6  -7  -1    2.16    0.41 
   6  -7  -1    1.74    0.47 
   6  -7  -1    1.35    0.49 
   6  -7  -1    1.38    0.35 
   6  -7  -1    2.11    0.42 
  -6   7   1    1.60    0.38 
  -6   7   1    1.81    0.44 
  -6   7   1    1.11    0.38 
  -6   7   1    1.58    0.40 
  -6   7   1    1.67    0.36 
   5  -7  -1    2.79    0.42 
   5  -7  -1    2.19    0.39 
   5  -7  -1    2.02    0.33 
   5  -7  -1    2.82    0.51 
   5  -7  -1    2.40    0.46 
  -5   7   1    2.88    0.46 
  -5   7   1    2.51    0.37 
  -5   7   1    2.57    0.43 
  -5   7   1    2.21    0.37 
  -5   7   1    3.04    0.48 
   4  -7  -1   30.91    0.93 
   4  -7  -1   30.92    1.05 
   4  -7  -1   29.83    1.14 
   4  -7  -1   31.47    1.13 
   4  -7  -1   31.98    0.94 
   4  -7  -1   32.18    1.04 
  -4   7   1   30.76    1.08 
  -4   7   1   31.15    1.06 
  -4   7   1   31.65    1.06 
  -4   7   1   32.38    1.09 
  -4   7   1   31.44    1.05 
  -4   7   1   31.86    1.08 
  -4   7   1   31.14    1.10 
   3  -7  -1  125.10    3.04 
   3  -7  -1  123.00    3.02 
   3  -7  -1  125.89    2.90 
   3  -7  -1  126.09    2.89 
   3  -7  -1  126.89    2.95 
   3  -7  -1  129.06    2.90 
   3  -7  -1  123.45    2.89 
   3  -7  -1  128.21    3.02 
  -3   7   1  126.26    3.01 
  -3   7   1  119.87    2.89 
  -3   7   1  122.15    2.96 
  -3   7   1  126.41    2.88 
  -3   7   1  125.39    2.95 
  -3   7   1  124.52    2.98 
  -3   7   1  123.53    2.90 
   2  -7  -1  128.04    2.99 
   2  -7  -1  125.69    2.91 
   2  -7  -1  124.80    3.01 
   2  -7  -1  127.60    3.02 
   2  -7  -1  125.18    2.90 
   2  -7  -1  129.62    3.04 
   2  -7  -1  130.58    2.91 
   2  -7  -1  118.88    3.03 
  -2   7   1  126.12    2.89 
  -2   7   1  125.14    2.96 
  -2   7   1  131.11    2.97 
  -2   7   1  123.60    2.90 
  -2   7   1  129.47    2.96 
  -2   7   1  130.77    3.00 
  -2   7   1  128.56    2.99 
  -2   7   1  125.86    2.89 
   1  -7  -1   20.45    0.78 
   1  -7  -1   19.15    0.68 
   1  -7  -1   20.09    0.74 
   1  -7  -1   18.47    0.72 
   1  -7  -1   19.36    0.75 
   1  -7  -1   19.72    0.64 
   1  -7  -1   19.03    0.76 
  -1   7   1   18.37    0.73 
  -1   7   1   19.12    0.71 
  -1   7   1   18.98    0.70 
  -1   7   1   19.00    0.73 
  -1   7   1   19.34    0.70 
  -1   7   1   19.26    0.71 
  -1   7   1   19.09    0.64 
   0  -7  -1   22.72    0.79 
   0  -7  -1   22.84    0.85 
   0  -7  -1   23.04    0.79 
   0  -7  -1   24.46    0.85 
   0  -7  -1   24.89    0.87 
   0  -7  -1   23.54    0.72 
   0   7   1   23.28    0.82 
   0   7   1   23.39    0.77 
   0   7   1   23.28    0.81 
   0   7   1   23.44    0.76 
   0   7   1   22.78    0.74 
   0   7   1   22.34    0.76 
   0   7   1   24.01    0.79 
  -1  -7  -1  108.68    2.43 
  -1  -7  -1  105.86    2.53 
  -1  -7  -1  106.85    2.66 
  -1  -7  -1  107.88    2.46 
  -1  -7  -1  111.30    2.63 
  -1  -7  -1  106.18    2.46 
  -1  -7  -1  105.68    2.44 
   1   7   1   98.31    2.44 
   1   7   1  105.00    2.48 
   1   7   1  105.02    2.44 
   1   7   1  109.01    2.49 
   1   7   1  103.98    2.42 
   1   7   1  106.22    2.41 
   1   7   1  106.00    2.50 
  -2  -7  -1  158.24    3.52 
  -2  -7  -1  158.38    3.43 
  -2  -7  -1  158.14    3.42 
  -2  -7  -1  153.90    3.46 
  -2  -7  -1  157.03    3.61 
  -2  -7  -1  155.76    3.44 
  -2  -7  -1  155.77    3.74 
   2   7   1  153.90    3.42 
   2   7   1  150.76    3.34 
   2   7   1  153.46    3.55 
   2   7   1  155.73    3.37 
   2   7   1  152.50    3.50 
   2   7   1  157.66    3.52 
   2   7   1  158.35    3.44 
  -3  -7  -1  363.78    7.62 
  -3  -7  -1  350.81    7.68 
  -3  -7  -1  351.16    7.43 
  -3  -7  -1  353.89    7.98 
  -3  -7  -1  353.60    7.32 
  -3  -7  -1  358.62    7.41 
  -3  -7  -1  348.21    7.53 
   3   7   1  362.77    7.65 
   3   7   1  350.35    7.58 
   3   7   1  351.75    7.81 
   3   7   1  347.91    7.38 
   3   7   1  365.38    7.14 
   3   7   1  353.26    7.28 
   3   7   1  355.18    7.40 
  -4  -7  -1   45.08    1.44 
  -4  -7  -1   45.48    1.29 
  -4  -7  -1   44.10    1.27 
  -4  -7  -1   46.41    1.26 
  -4  -7  -1   45.17    1.10 
  -4  -7  -1   45.04    1.17 
  -4  -7  -1   45.46    1.23 
   4   7   1   43.37    1.31 
   4   7   1   47.33    1.24 
   4   7   1   47.00    1.29 
   4   7   1   45.24    1.31 
   4   7   1   46.03    1.20 
   4   7   1   45.32    1.24 
   4   7   1   44.89    1.20 
  -5  -7  -1    3.03    0.33 
  -5  -7  -1    2.97    0.33 
  -5  -7  -1    4.30    0.51 
  -5  -7  -1    3.54    0.40 
  -5  -7  -1    2.89    0.19 
  -5  -7  -1    3.45    0.40 
  -5  -7  -1    3.60    0.32 
   5   7   1    3.52    0.31 
   5   7   1    3.96    0.34 
   5   7   1    3.75    0.39 
   5   7   1    3.57    0.37 
   5   7   1    4.15    0.44 
   5   7   1    3.35    0.41 
   5   7   1    3.75    0.35 
  -6  -7  -1   65.83    1.73 
  -6  -7  -1   63.86    1.66 
  -6  -7  -1   65.95    1.77 
  -6  -7  -1   67.75    1.97 
  -6  -7  -1   67.82    1.68 
  -6  -7  -1   61.81    1.72 
   6   7   1   65.42    1.85 
   6   7   1   64.35    1.55 
   6   7   1   66.68    1.74 
   6   7   1   67.52    1.70 
   6   7   1   66.33    1.74 
   6   7   1   66.20    1.64 
   6   7   1   63.31    1.81 
  -7  -7  -1   27.41    1.14 
  -7  -7  -1   27.45    0.93 
  -7  -7  -1   27.98    0.96 
  -7  -7  -1   27.21    0.93 
  -7  -7  -1   28.16    1.04 
  -7  -7  -1   29.42    1.05 
  -7  -7  -1   28.40    0.98 
   7   7   1   28.78    1.09 
   7   7   1   26.11    1.06 
   7   7   1   28.37    1.01 
   7   7   1   26.69    0.90 
   7   7   1   28.15    1.02 
   7   7   1   28.39    0.80 
  -8  -7  -1   62.34    1.79 
  -8  -7  -1   63.20    1.73 
  -8  -7  -1   61.10    1.70 
  -8  -7  -1   62.80    1.95 
  -8  -7  -1   62.04    1.74 
   8   7   1   63.35    1.90 
   8   7   1   60.74    1.73 
   8   7   1   60.44    1.84 
   8   7   1   58.85    1.45 
   8   7   1   60.75    1.60 
   8   7   1   61.22    1.76 
  -9  -7  -1    1.07    0.39 
  -9  -7  -1    0.92    0.44 
  -9  -7  -1    0.92    0.41 
  -9  -7  -1    1.17    0.38 
  -9  -7  -1    0.70    0.36 
   9   7   1    1.51    0.48 
   9   7   1    1.23    0.33 
   9   7   1    1.30    0.45 
   9   7   1    0.94    0.36 
 -10  -7  -1   19.93    1.04 
 -10  -7  -1   17.43    0.91 
 -10  -7  -1   18.21    0.93 
 -10  -7  -1   18.72    0.96 
 -10  -7  -1   19.72    0.98 
  10   7   1   19.58    1.06 
  10   7   1   19.51    0.85 
  10   7   1   19.16    1.07 
  10   7   1   19.17    0.96 
 -11  -7  -1   12.78    0.87 
 -11  -7  -1   11.18    0.83 
 -11  -7  -1   11.26    0.81 
 -11  -7  -1   12.02    0.88 
 -11  -7  -1   11.75    0.84 
  11   7   1   11.99    0.93 
  11   7   1   11.07    0.70 
  11   7   1   11.68    0.83 
  11   7   1   10.79    0.90 
 -12  -7  -1    3.93    0.60 
 -12  -7  -1    3.57    0.60 
 -12  -7  -1    3.46    0.65 
 -12  -7  -1    5.08    0.70 
 -12  -7  -1    3.58    0.60 
  12   7   1    3.50    0.50 
  12   7   1    3.40    0.65 
  12   7   1    3.15    0.70 
  12   7   1    3.29    0.57 
 -13  -7  -1   -0.70    0.48 
 -13  -7  -1    0.26    0.47 
 -13  -7  -1    0.14    0.43 
 -13  -7  -1    0.94    0.52 
  13   7   1    0.34    0.37 
  13   7   1    0.23    0.45 
  13   7   1    0.63    0.58 
  13   7   1   -0.71    0.43 
 -14  -7  -1   14.36    1.12 
 -14  -7  -1   14.93    1.12 
 -14  -7  -1   15.28    1.07 
 -14  -7  -1   15.96    1.13 
  14   7   1   13.42    0.89 
  14   7   1   14.04    1.05 
  14   7   1   12.43    1.21 
  14   7   1   12.81    1.15 
 -15  -7  -1   21.40    1.28 
 -15  -7  -1   17.17    1.29 
 -15  -7  -1   19.77    1.29 
 -15  -7  -1   18.96    1.26 
  15   7   1   18.75    1.19 
  15   7   1   13.17    1.31 
  15   7   1   19.36    1.07 
  15   7   1   19.67    1.32 
 -16  -7  -1   25.80    1.56 
 -16  -7  -1   27.39    1.49 
 -16  -7  -1   24.70    1.50 
 -16  -7  -1   26.08    1.51 
  16   7   1   26.84    1.55 
  16   7   1   23.87    1.54 
  16   7   1   25.10    1.24 
  16   7   1   25.51    1.37 
  11  -8  -1   24.30    1.51 
  11  -8  -1   26.41    1.31 
  11  -8  -1   27.57    1.53 
  11  -8  -1   26.99    1.36 
 -11   8   1   27.61    1.45 
 -11   8   1   24.05    1.46 
  10  -8  -1    1.97    0.65 
  10  -8  -1    2.13    0.73 
  10  -8  -1    2.87    0.63 
  10  -8  -1    2.37    0.64 
  10  -8  -1    3.65    0.66 
 -10   8   1    3.28    0.74 
 -10   8   1    2.78    0.69 
   9  -8  -1   13.93    1.16 
   9  -8  -1   13.63    1.15 
   9  -8  -1   12.58    0.98 
   9  -8  -1   14.48    0.94 
   9  -8  -1   13.47    0.94 
  -9   8   1   15.93    1.00 
  -9   8   1   14.92    1.03 
  -9   8   1   15.54    1.06 
  -9   8   1   13.43    1.02 
   8  -8  -1    2.13    0.48 
   8  -8  -1    3.50    0.69 
   8  -8  -1    3.35    0.67 
   8  -8  -1    3.12    0.53 
  -8   8   1    2.93    0.48 
  -8   8   1    3.59    0.58 
  -8   8   1    3.75    0.64 
  -8   8   1    2.84    0.61 
  -8   8   1    3.00    0.53 
   7  -8  -1    7.45    0.66 
   7  -8  -1    8.63    0.84 
   7  -8  -1   10.14    0.72 
   7  -8  -1    7.32    0.81 
  -7   8   1    9.25    0.81 
  -7   8   1    8.88    0.76 
  -7   8   1    6.98    0.67 
  -7   8   1    9.39    0.83 
  -7   8   1    7.31    0.66 
   6  -8  -1    0.13    0.43 
   6  -8  -1    0.20    0.37 
   6  -8  -1    0.52    0.47 
   6  -8  -1    0.06    0.33 
  -6   8   1   -0.27    0.36 
  -6   8   1   -0.87    0.29 
  -6   8   1    0.13    0.32 
  -6   8   1    0.24    0.28 
  -6   8   1   -0.19    0.32 
   5  -8  -1    0.68    0.34 
   5  -8  -1    0.06    0.32 
   5  -8  -1    1.21    0.47 
   5  -8  -1    0.23    0.39 
   5  -8  -1    1.16    0.36 
  -5   8   1    0.50    0.33 
  -5   8   1    0.56    0.34 
  -5   8   1    0.86    0.40 
  -5   8   1    0.11    0.31 
  -5   8   1    0.64    0.37 
   4  -8  -1  106.03    2.56 
   4  -8  -1  101.05    2.71 
   4  -8  -1  105.43    2.70 
   4  -8  -1  104.41    2.58 
   4  -8  -1  104.32    2.58 
  -4   8   1  100.23    2.62 
  -4   8   1  105.95    2.66 
  -4   8   1  103.25    2.61 
  -4   8   1  105.67    2.67 
  -4   8   1  100.44    2.54 
   3  -8  -1  173.78    3.88 
   3  -8  -1  170.77    4.02 
   3  -8  -1  172.83    4.06 
   3  -8  -1  171.53    3.99 
   3  -8  -1  170.88    3.89 
   3  -8  -1  170.94    3.89 
  -3   8   1  172.55    4.00 
  -3   8   1  172.87    3.85 
  -3   8   1  167.03    3.97 
  -3   8   1  177.06    3.95 
  -3   8   1  168.55    3.89 
  -3   8   1  169.24    3.89 
  -3   8   1  175.78    4.04 
   2  -8  -1   18.24    0.81 
   2  -8  -1   18.06    0.77 
   2  -8  -1   20.00    0.77 
   2  -8  -1   18.33    0.83 
   2  -8  -1   19.26    0.84 
   2  -8  -1   20.42    0.65 
   2  -8  -1   19.26    0.79 
   2  -8  -1   18.36    0.75 
  -2   8   1   18.50    0.77 
  -2   8   1   19.91    0.73 
  -2   8   1   19.17    0.80 
  -2   8   1   17.74    0.78 
  -2   8   1   17.45    0.74 
  -2   8   1   19.24    0.77 
  -2   8   1   19.40    0.77 
  -2   8   1   19.42    0.78 
   1  -8  -1    0.66    0.26 
   1  -8  -1    0.37    0.32 
   1  -8  -1    0.08    0.25 
   1  -8  -1    0.32    0.25 
   1  -8  -1    0.36    0.18 
   1  -8  -1    0.40    0.23 
   1  -8  -1    0.21    0.28 
  -1   8   1    0.57    0.27 
  -1   8   1    0.49    0.20 
  -1   8   1    0.21    0.22 
  -1   8   1    0.13    0.19 
  -1   8   1    0.10    0.21 
  -1   8   1    0.35    0.22 
  -1   8   1    0.16    0.19 
   0  -8  -1    1.57    0.25 
   0  -8  -1    2.15    0.39 
   0  -8  -1    1.76    0.28 
   0  -8  -1    1.98    0.33 
   0  -8  -1    1.98    0.34 
   0  -8  -1    2.43    0.38 
   0  -8  -1    2.00    0.33 
   0  -8  -1    1.53    0.32 
   0   8   1    1.44    0.28 
   0   8   1    2.09    0.27 
   0   8   1    2.77    0.37 
   0   8   1    1.77    0.30 
   0   8   1    1.87    0.32 
   0   8   1    2.10    0.29 
   0   8   1    1.78    0.32 
  -1  -8  -1  271.07    5.97 
  -1  -8  -1  272.48    6.26 
  -1  -8  -1  271.56    5.92 
  -1  -8  -1  276.03    5.84 
  -1  -8  -1  288.38    6.16 
  -1  -8  -1  275.05    5.79 
  -1  -8  -1  275.36    5.94 
   1   8   1  270.55    5.94 
   1   8   1  273.21    6.07 
   1   8   1  278.73    6.01 
   1   8   1  271.93    5.74 
   1   8   1  264.70    5.81 
   1   8   1  263.46    5.85 
   1   8   1  274.36    5.70 
  -2  -8  -1  144.67    3.26 
  -2  -8  -1  143.33    3.27 
  -2  -8  -1  146.13    3.29 
  -2  -8  -1  149.22    3.29 
  -2  -8  -1  145.62    3.28 
  -2  -8  -1  144.82    3.47 
  -2  -8  -1  146.02    3.58 
  -2  -8  -1  146.99    3.37 
   2   8   1  147.85    3.24 
   2   8   1  142.59    3.36 
   2   8   1  142.94    3.28 
   2   8   1  139.54    3.25 
   2   8   1  140.76    3.34 
   2   8   1  149.56    3.23 
   2   8   1  148.94    3.35 
  -3  -8  -1  120.55    2.85 
  -3  -8  -1  125.48    2.84 
  -3  -8  -1  123.81    3.14 
  -3  -8  -1  120.36    2.89 
  -3  -8  -1  123.36    2.84 
  -3  -8  -1  119.23    2.75 
  -3  -8  -1  124.09    2.95 
   3   8   1  124.81    2.85 
   3   8   1  121.75    2.92 
   3   8   1  122.26    2.92 
   3   8   1  126.16    2.79 
   3   8   1  128.96    2.89 
   3   8   1  117.99    2.79 
   3   8   1  121.74    2.77 
  -4  -8  -1    3.65    0.50 
  -4  -8  -1    3.26    0.40 
  -4  -8  -1    3.09    0.28 
  -4  -8  -1    3.16    0.42 
  -4  -8  -1    3.81    0.33 
  -4  -8  -1    3.54    0.39 
  -4  -8  -1    2.90    0.35 
   4   8   1    3.04    0.37 
   4   8   1    3.51    0.38 
   4   8   1    3.65    0.35 
   4   8   1    3.46    0.35 
   4   8   1    3.03    0.33 
   4   8   1    3.24    0.40 
   4   8   1    3.46    0.40 
  -5  -8  -1    5.46    0.51 
  -5  -8  -1    4.88    0.36 
  -5  -8  -1    4.56    0.27 
  -5  -8  -1    5.05    0.57 
  -5  -8  -1    5.06    0.43 
  -5  -8  -1    5.32    0.46 
  -5  -8  -1    4.56    0.46 
   5   8   1    5.36    0.46 
   5   8   1    5.81    0.40 
   5   8   1    5.25    0.50 
   5   8   1    4.81    0.37 
   5   8   1    5.63    0.48 
   5   8   1    5.67    0.51 
   5   8   1    5.74    0.45 
  -6  -8  -1    1.47    0.43 
  -6  -8  -1    1.46    0.37 
  -6  -8  -1    1.08    0.28 
  -6  -8  -1    1.00    0.30 
  -6  -8  -1    1.29    0.32 
  -6  -8  -1    1.02    0.28 
   6   8   1    1.12    0.32 
   6   8   1    1.60    0.30 
   6   8   1    1.15    0.33 
   6   8   1    1.67    0.26 
   6   8   1    1.18    0.32 
   6   8   1    1.24    0.35 
  -7  -8  -1   39.43    1.23 
  -7  -8  -1   40.50    1.26 
  -7  -8  -1   40.82    1.49 
  -7  -8  -1   41.43    1.21 
  -7  -8  -1   41.33    1.32 
   7   8   1   39.49    1.38 
   7   8   1   40.62    1.29 
   7   8   1   39.87    1.30 
   7   8   1   41.96    1.39 
   7   8   1   39.87    1.10 
   7   8   1   38.43    1.18 
  -8  -8  -1   52.61    1.78 
  -8  -8  -1   51.11    1.52 
  -8  -8  -1   52.19    1.49 
  -8  -8  -1   52.00    1.59 
  -8  -8  -1   50.92    1.54 
   8   8   1   50.83    1.57 
   8   8   1   50.24    1.66 
   8   8   1   51.41    1.45 
   8   8   1   52.00    1.70 
   8   8   1   49.73    1.56 
   8   8   1   50.50    1.29 
  -9  -8  -1    0.45    0.38 
  -9  -8  -1    0.20    0.35 
  -9  -8  -1    0.39    0.40 
  -9  -8  -1   -0.16    0.32 
  -9  -8  -1    0.14    0.34 
   9   8   1   -0.53    0.36 
   9   8   1    0.18    0.36 
   9   8   1    0.08    0.30 
   9   8   1    0.26    0.33 
   9   8   1    0.45    0.39 
 -10  -8  -1    5.49    0.72 
 -10  -8  -1    5.15    0.60 
 -10  -8  -1    5.26    0.57 
 -10  -8  -1    5.94    0.64 
 -10  -8  -1    5.54    0.63 
  10   8   1    5.54    0.60 
  10   8   1    3.79    0.64 
  10   8   1    4.94    0.67 
  10   8   1    5.81    0.56 
 -11  -8  -1    1.10    0.45 
 -11  -8  -1    1.09    0.46 
 -11  -8  -1    0.59    0.42 
 -11  -8  -1    1.11    0.44 
 -11  -8  -1    1.17    0.44 
  11   8   1    0.31    0.39 
  11   8   1    1.16    0.54 
  11   8   1    1.05    0.39 
  11   8   1    1.07    0.54 
 -12  -8  -1   17.40    1.03 
 -12  -8  -1   17.50    1.01 
 -12  -8  -1   17.42    1.03 
 -12  -8  -1   19.33    1.12 
 -12  -8  -1   18.05    1.01 
  12   8   1   17.37    0.91 
  12   8   1   17.53    1.01 
  12   8   1   16.68    1.16 
  12   8   1   16.96    1.14 
 -13  -8  -1   13.99    1.00 
 -13  -8  -1   13.76    1.05 
 -13  -8  -1   12.89    1.00 
 -13  -8  -1   11.36    0.95 
 -13  -8  -1   13.90    0.96 
  13   8   1   10.57    1.05 
  13   8   1   12.25    0.96 
  13   8   1   12.19    0.85 
  13   8   1   10.63    1.07 
 -14  -8  -1   25.24    1.30 
 -14  -8  -1   26.28    1.35 
 -14  -8  -1   20.42    1.26 
 -14  -8  -1   24.47    1.31 
  14   8   1   24.18    1.42 
  14   8   1   22.10    1.39 
  14   8   1   25.10    1.29 
  14   8   1   22.14    1.12 
 -15  -8  -1   53.71    2.08 
 -15  -8  -1   55.33    2.04 
 -15  -8  -1   54.78    2.03 
 -15  -8  -1   52.97    2.03 
  15   8   1   51.06    1.94 
  15   8   1   49.69    2.16 
  15   8   1   51.61    1.77 
  15   8   1   52.17    2.13 
  11  -9  -1    2.23    0.73 
  11  -9  -1    3.25    0.86 
  11  -9  -1    2.55    0.64 
  11  -9  -1    3.76    0.74 
 -11   9   1    3.72    0.81 
 -11   9   1    2.28    0.70 
  10  -9  -1    0.77    0.72 
  10  -9  -1    0.68    0.52 
  10  -9  -1    0.58    0.61 
  10  -9  -1    1.26    0.57 
 -10   9   1    0.37    0.58 
 -10   9   1    1.33    0.67 
   9  -9  -1    3.60    0.60 
   9  -9  -1    2.73    0.69 
   9  -9  -1    3.34    0.82 
   9  -9  -1    3.23    0.61 
  -9   9   1    3.77    0.74 
  -9   9   1    3.25    0.70 
   8  -9  -1   -0.69    0.51 
   8  -9  -1    0.08    0.42 
   8  -9  -1    0.07    0.39 
   8  -9  -1   -0.61    0.50 
   8  -9  -1    0.13    0.40 
  -8   9   1   -0.25    0.47 
  -8   9   1    0.22    0.44 
  -8   9   1   -0.53    0.38 
  -8   9   1   -0.59    0.44 
   7  -9  -1    0.36    0.40 
   7  -9  -1    1.01    0.57 
   7  -9  -1    1.58    0.48 
   7  -9  -1    0.99    0.55 
   7  -9  -1    1.35    0.43 
  -7   9   1    0.44    0.44 
  -7   9   1    0.69    0.40 
  -7   9   1    0.62    0.37 
  -7   9   1    0.21    0.46 
  -7   9   1    0.62    0.42 
   6  -9  -1    2.27    0.49 
   6  -9  -1    3.26    0.51 
   6  -9  -1    3.24    0.53 
   6  -9  -1    2.22    0.60 
   6  -9  -1    2.82    0.65 
  -6   9   1    2.82    0.57 
  -6   9   1    2.34    0.47 
  -6   9   1    3.04    0.54 
  -6   9   1    2.15    0.48 
  -6   9   1    1.93    0.48 
   5  -9  -1   44.90    1.51 
   5  -9  -1   46.08    1.66 
   5  -9  -1   47.96    1.64 
   5  -9  -1   47.03    1.52 
   5  -9  -1   46.94    1.51 
  -5   9   1   47.16    1.55 
  -5   9   1   47.67    1.57 
  -5   9   1   46.87    1.56 
  -5   9   1   47.37    1.55 
  -5   9   1   46.46    1.53 
   4  -9  -1   91.65    2.52 
   4  -9  -1   92.56    2.38 
   4  -9  -1   87.96    2.47 
   4  -9  -1   87.66    2.35 
  -4   9   1   91.47    2.42 
  -4   9   1   91.22    2.38 
  -4   9   1   89.41    2.40 
  -4   9   1   91.47    2.41 
  -4   9   1   89.84    2.44 
   3  -9  -1   14.05    0.69 
   3  -9  -1   14.54    0.85 
   3  -9  -1   15.36    0.86 
   3  -9  -1   15.16    0.78 
   3  -9  -1   14.78    0.77 
  -3   9   1   14.32    0.74 
  -3   9   1   15.78    0.74 
  -3   9   1   15.24    0.80 
  -3   9   1   15.29    0.81 
  -3   9   1   15.24    0.76 
   2  -9  -1    1.31    0.33 
   2  -9  -1    2.20    0.35 
   2  -9  -1    1.48    0.43 
   2  -9  -1    1.44    0.40 
   2  -9  -1    1.07    0.31 
  -2   9   1    1.56    0.33 
  -2   9   1    1.51    0.33 
  -2   9   1    1.03    0.29 
  -2   9   1    1.71    0.35 
  -2   9   1    1.15    0.35 
  -2   9   1    1.82    0.35 
  -2   9   1    1.62    0.34 
  -2   9   1    1.82    0.38 
   1  -9  -1    8.91    0.62 
   1  -9  -1    7.79    0.57 
   1  -9  -1    8.12    0.57 
   1  -9  -1   10.41    0.47 
   1  -9  -1    8.85    0.65 
   1  -9  -1    8.62    0.63 
   1  -9  -1    9.20    0.54 
  -1   9   1    8.61    0.54 
  -1   9   1    7.93    0.53 
  -1   9   1    8.88    0.48 
  -1   9   1    8.31    0.58 
  -1   9   1    8.41    0.56 
  -1   9   1    8.60    0.60 
  -1   9   1    9.30    0.56 
   0  -9  -1    3.49    0.48 
   0  -9  -1    3.41    0.40 
   0  -9  -1    2.86    0.41 
   0  -9  -1    3.37    0.45 
   0  -9  -1    3.58    0.38 
   0  -9  -1    3.00    0.31 
   0  -9  -1    3.85    0.44 
   0  -9  -1    4.27    0.48 
   0   9   1    3.62    0.45 
   0   9   1    3.83    0.39 
   0   9   1    3.13    0.32 
   0   9   1    4.44    0.44 
   0   9   1    4.75    0.39 
   0   9   1    3.54    0.41 
   0   9   1    4.17    0.45 
   0   9   1    3.90    0.43 
  -1  -9  -1  204.55    4.49 
  -1  -9  -1  203.43    4.52 
  -1  -9  -1  202.07    4.81 
  -1  -9  -1  200.31    4.58 
  -1  -9  -1  205.02    4.48 
  -1  -9  -1  203.53    4.44 
  -1  -9  -1  211.36    4.73 
   1   9   1  200.60    4.40 
   1   9   1  202.94    4.57 
   1   9   1  201.06    4.45 
   1   9   1  196.82    4.58 
   1   9   1  202.54    4.40 
   1   9   1  194.15    4.46 
   1   9   1  195.41    4.53 
  -2  -9  -1   38.09    1.05 
  -2  -9  -1   36.87    1.22 
  -2  -9  -1   36.05    1.16 
  -2  -9  -1   37.13    1.10 
  -2  -9  -1   37.76    1.18 
  -2  -9  -1   36.59    1.16 
  -2  -9  -1   37.10    1.27 
  -2  -9  -1   35.74    1.29 
   2   9   1   36.61    1.11 
   2   9   1   33.78    1.10 
   2   9   1   35.70    1.16 
   2   9   1   37.72    1.12 
   2   9   1   35.98    1.16 
   2   9   1   39.80    1.17 
   2   9   1   36.29    1.10 
  -3  -9  -1    0.85    0.25 
  -3  -9  -1    0.82    0.28 
  -3  -9  -1    1.07    0.34 
  -3  -9  -1    0.48    0.35 
  -3  -9  -1    0.82    0.30 
  -3  -9  -1    0.97    0.26 
  -3  -9  -1    0.95    0.30 
   3   9   1    0.82    0.26 
   3   9   1    0.86    0.27 
   3   9   1    1.58    0.26 
   3   9   1    0.58    0.24 
   3   9   1    1.40    0.33 
   3   9   1    0.83    0.27 
   3   9   1    0.66    0.25 
  -4  -9  -1   -0.03    0.26 
  -4  -9  -1    0.07    0.22 
  -4  -9  -1    0.21    0.20 
  -4  -9  -1    0.11    0.32 
  -4  -9  -1   -0.03    0.29 
  -4  -9  -1    0.15    0.26 
  -4  -9  -1    0.45    0.27 
   4   9   1   -0.08    0.17 
   4   9   1    0.11    0.27 
   4   9   1    0.30    0.24 
   4   9   1   -0.24    0.22 
   4   9   1   -0.14    0.24 
   4   9   1    0.12    0.22 
   4   9   1    0.27    0.21 
  -5  -9  -1    1.40    0.37 
  -5  -9  -1    1.54    0.35 
  -5  -9  -1    1.69    0.36 
  -5  -9  -1    1.49    0.42 
  -5  -9  -1    1.47    0.29 
  -5  -9  -1    1.83    0.24 
  -5  -9  -1    1.46    0.31 
   5   9   1    1.26    0.33 
   5   9   1    1.46    0.36 
   5   9   1    1.19    0.31 
   5   9   1    1.60    0.30 
   5   9   1    1.80    0.36 
   5   9   1    1.33    0.27 
  -6  -9  -1    9.36    0.75 
  -6  -9  -1   11.60    0.64 
  -6  -9  -1   11.16    0.67 
  -6  -9  -1   10.91    0.63 
  -6  -9  -1   10.28    0.55 
   6   9   1   10.18    0.66 
   6   9   1   10.91    0.70 
   6   9   1   10.68    0.65 
   6   9   1   10.72    0.71 
   6   9   1   10.00    0.54 
   6   9   1   10.81    0.60 
  -7  -9  -1   15.76    0.77 
  -7  -9  -1   14.32    0.95 
  -7  -9  -1   15.72    0.69 
  -7  -9  -1   15.50    0.83 
   7   9   1   14.43    0.70 
   7   9   1   15.47    0.78 
   7   9   1   15.40    0.86 
   7   9   1   16.00    0.66 
   7   9   1   15.80    0.86 
   7   9   1   15.15    0.83 
  -8  -9  -1   13.07    0.74 
  -8  -9  -1   14.03    0.94 
  -8  -9  -1   14.73    0.76 
  -8  -9  -1   14.49    0.82 
  -8  -9  -1   14.05    0.70 
   8   9   1   13.72    0.81 
   8   9   1   14.53    0.73 
   8   9   1   14.74    0.92 
   8   9   1   13.71    0.60 
   8   9   1   13.65    0.85 
   8   9   1   15.69    0.85 
  -9  -9  -1    6.16    0.59 
  -9  -9  -1    6.21    0.61 
  -9  -9  -1    6.50    0.61 
  -9  -9  -1    6.31    0.65 
  -9  -9  -1    5.47    0.73 
   9   9   1    6.08    0.70 
   9   9   1    7.60    0.59 
   9   9   1    5.03    0.65 
   9   9   1    7.12    0.68 
   9   9   1    6.05    0.61 
 -10  -9  -1    1.54    0.48 
 -10  -9  -1    2.02    0.46 
 -10  -9  -1    1.72    0.45 
 -10  -9  -1    2.19    0.61 
 -10  -9  -1    1.76    0.46 
  10   9   1    2.22    0.47 
  10   9   1    2.07    0.54 
  10   9   1    1.40    0.51 
  10   9   1    1.67    0.40 
 -11  -9  -1    3.92    0.54 
 -11  -9  -1    4.06    0.63 
 -11  -9  -1    3.99    0.72 
 -11  -9  -1    4.28    0.61 
 -11  -9  -1    4.05    0.57 
  11   9   1    2.90    0.52 
  11   9   1    3.99    0.71 
  11   9   1    4.60    0.57 
  11   9   1    3.31    0.68 
 -12  -9  -1   16.00    0.96 
 -12  -9  -1   16.13    1.02 
 -12  -9  -1   17.86    0.98 
 -12  -9  -1   15.33    1.00 
 -12  -9  -1   14.97    1.10 
  12   9   1   15.14    0.90 
  12   9   1   15.86    1.12 
  12   9   1   15.55    1.00 
  12   9   1   17.27    1.16 
 -13  -9  -1   23.31    1.20 
 -13  -9  -1   22.77    1.23 
 -13  -9  -1   23.81    1.19 
 -13  -9  -1   22.03    1.23 
 -13  -9  -1   22.89    1.34 
  13   9   1   21.04    1.33 
  13   9   1   21.95    1.21 
  13   9   1   22.77    1.08 
  13   9   1   21.23    1.38 
 -14  -9  -1   34.33    1.54 
 -14  -9  -1   36.05    1.58 
 -14  -9  -1   35.00    1.57 
 -14  -9  -1   33.58    1.51 
  14   9   1   35.09    1.66 
  14   9   1   33.47    1.36 
  14   9   1   30.89    1.68 
  14   9   1   32.78    1.51 
 -15  -9  -1   53.97    2.06 
 -15  -9  -1   56.07    2.11 
 -15  -9  -1   59.64    2.18 
 -15  -9  -1   59.46    2.14 
  15   9   1   57.46    1.87 
  15   9   1   57.29    2.05 
  15   9   1   53.23    2.19 
  15   9   1   54.69    2.28 
  10 -10  -1   -0.62    0.58 
  10 -10  -1    1.58    0.60 
  10 -10  -1   -0.53    0.48 
  10 -10  -1    0.15    0.52 
  10 -10  -1    0.25    0.72 
 -10  10   1   -0.13    0.62 
 -10  10   1    0.93    0.66 
   9 -10  -1    1.27    0.73 
   9 -10  -1    2.09    0.59 
   9 -10  -1    1.96    0.58 
   9 -10  -1    1.54    0.53 
   9 -10  -1    1.37    0.64 
  -9  10   1    2.63    0.69 
  -9  10   1    1.59    0.63 
   8 -10  -1    0.20    0.44 
   8 -10  -1   -0.47    0.60 
   8 -10  -1   -0.12    0.44 
   8 -10  -1    0.10    0.53 
   8 -10  -1   -0.21    0.42 
  -8  10   1    0.18    0.48 
  -8  10   1   -0.58    0.50 
   7 -10  -1    0.44    0.46 
   7 -10  -1    0.29    0.41 
   7 -10  -1    0.03    0.50 
   7 -10  -1    0.31    0.41 
   7 -10  -1    0.05    0.57 
  -7  10   1    0.23    0.42 
  -7  10   1   -0.36    0.39 
  -7  10   1    0.38    0.49 
  -7  10   1   -0.74    0.32 
   6 -10  -1   15.32    0.92 
   6 -10  -1   14.52    1.05 
   6 -10  -1   13.71    1.04 
   6 -10  -1   15.50    0.97 
  -6  10   1   14.20    0.96 
  -6  10   1   14.10    0.90 
  -6  10   1   15.18    0.91 
  -6  10   1   14.83    0.98 
  -6  10   1   15.72    0.92 
   5 -10  -1   91.06    2.64 
   5 -10  -1   90.72    2.62 
   5 -10  -1   87.52    2.45 
   5 -10  -1   90.29    2.48 
  -5  10   1   93.09    2.58 
  -5  10   1   88.32    2.46 
  -5  10   1   94.04    2.54 
  -5  10   1   87.93    2.48 
  -5  10   1   93.50    2.54 
   4 -10  -1   71.29    2.12 
   4 -10  -1   76.36    2.27 
   4 -10  -1   76.59    2.26 
   4 -10  -1   76.66    2.14 
  -4  10   1   78.14    2.18 
  -4  10   1   74.31    2.13 
  -4  10   1   77.11    2.20 
  -4  10   1   77.86    2.18 
  -4  10   1   73.47    2.12 
   3 -10  -1   22.69    1.08 
   3 -10  -1   22.53    1.00 
   3 -10  -1   21.63    1.00 
   3 -10  -1   21.79    1.07 
  -3  10   1   22.46    1.00 
  -3  10   1   22.91    0.99 
  -3  10   1   21.20    1.02 
  -3  10   1   22.28    0.96 
  -3  10   1   23.33    0.93 
   2 -10  -1    5.21    0.54 
   2 -10  -1    3.02    0.44 
   2 -10  -1    2.97    0.48 
   2 -10  -1    3.42    0.53 
   2 -10  -1    3.38    0.56 
  -2  10   1    4.41    0.48 
  -2  10   1    3.52    0.46 
  -2  10   1    3.38    0.49 
  -2  10   1    4.05    0.50 
  -2  10   1    4.40    0.50 
  -2  10   1    3.89    0.52 
   1 -10  -1   13.53    0.82 
   1 -10  -1   15.81    0.80 
   1 -10  -1   14.69    0.72 
   1 -10  -1   15.37    0.83 
   1 -10  -1   15.00    0.79 
  -1  10   1   16.82    0.77 
  -1  10   1   15.44    0.78 
  -1  10   1   15.50    0.75 
  -1  10   1   16.14    0.79 
  -1  10   1   15.77    0.75 
  -1  10   1   14.43    0.80 
  -1  10   1   16.37    0.68 
  -1  10   1   15.49    0.76 
   0 -10  -1  143.98    3.57 
   0 -10  -1  151.26    3.57 
   0 -10  -1  149.00    3.48 
   0 -10  -1  147.59    3.73 
   0 -10  -1  153.08    3.50 
   0 -10  -1  153.13    3.52 
   0  10   1  153.97    3.57 
   0  10   1  147.71    3.49 
   0  10   1  149.68    3.50 
   0  10   1  153.23    3.45 
   0  10   1  147.31    3.44 
   0  10   1  145.04    3.50 
   0  10   1  144.43    3.46 
   0  10   1  147.80    3.48 
  -1 -10  -1   73.78    1.98 
  -1 -10  -1   75.58    2.18 
  -1 -10  -1   75.91    1.88 
  -1 -10  -1   69.34    2.03 
  -1 -10  -1   79.59    2.12 
  -1 -10  -1   76.35    1.99 
  -1 -10  -1   75.10    1.99 
   1  10   1   73.29    1.93 
   1  10   1   76.83    1.98 
   1  10   1   74.02    1.93 
   1  10   1   72.60    1.94 
   1  10   1   71.62    1.99 
   1  10   1   70.48    1.98 
   1  10   1   75.17    1.97 
  -2 -10  -1    2.79    0.43 
  -2 -10  -1    3.29    0.42 
  -2 -10  -1    3.21    0.51 
  -2 -10  -1    3.06    0.35 
  -2 -10  -1    2.51    0.50 
  -2 -10  -1    3.61    0.49 
  -2 -10  -1    2.10    0.42 
   2  10   1    2.75    0.40 
   2  10   1    2.48    0.37 
   2  10   1    2.84    0.37 
   2  10   1    2.88    0.41 
   2  10   1    2.65    0.41 
   2  10   1    2.73    0.36 
   2  10   1    2.52    0.41 
  -3 -10  -1    7.52    0.48 
  -3 -10  -1    7.50    0.63 
  -3 -10  -1    9.28    0.82 
  -3 -10  -1    7.91    0.59 
  -3 -10  -1    8.30    0.61 
  -3 -10  -1    8.07    0.51 
  -3 -10  -1    8.47    0.63 
  -3 -10  -1    7.70    0.67 
   3  10   1    8.02    0.54 
   3  10   1    8.48    0.52 
   3  10   1    7.90    0.58 
   3  10   1    8.33    0.61 
   3  10   1    8.13    0.51 
   3  10   1    7.97    0.54 
   3  10   1    7.75    0.57 
  -4 -10  -1    3.04    0.54 
  -4 -10  -1    3.05    0.43 
  -4 -10  -1    2.25    0.38 
  -4 -10  -1    3.08    0.35 
  -4 -10  -1    2.55    0.45 
  -4 -10  -1    3.15    0.45 
  -4 -10  -1    3.14    0.37 
   4  10   1    2.89    0.45 
   4  10   1    3.05    0.39 
   4  10   1    3.14    0.42 
   4  10   1    3.08    0.41 
   4  10   1    2.89    0.38 
   4  10   1    2.65    0.40 
  -5 -10  -1    4.96    0.55 
  -5 -10  -1    5.47    0.54 
  -5 -10  -1    5.10    0.45 
  -5 -10  -1    6.12    0.59 
  -5 -10  -1    4.57    0.65 
   5  10   1    5.18    0.51 
   5  10   1    5.61    0.52 
   5  10   1    5.55    0.50 
   5  10   1    6.18    0.54 
   5  10   1    6.21    0.60 
   5  10   1    5.59    0.53 
  -6 -10  -1    2.68    0.50 
  -6 -10  -1    3.25    0.40 
  -6 -10  -1    4.20    0.52 
  -6 -10  -1    2.89    0.59 
   6  10   1    3.53    0.47 
   6  10   1    3.51    0.50 
   6  10   1    3.19    0.39 
   6  10   1    2.80    0.50 
   6  10   1    3.54    0.42 
   6  10   1    2.69    0.46 
  -7 -10  -1    6.05    0.59 
  -7 -10  -1    5.16    0.61 
  -7 -10  -1    6.02    0.79 
  -7 -10  -1    6.06    0.53 
   7  10   1    6.39    0.68 
   7  10   1    5.56    0.63 
   7  10   1    5.62    0.59 
   7  10   1    4.27    0.44 
   7  10   1    5.91    0.54 
   7  10   1    5.43    0.60 
  -8 -10  -1   31.33    1.08 
  -8 -10  -1   31.13    1.21 
  -8 -10  -1   27.32    1.38 
  -8 -10  -1   32.53    1.16 
  -8 -10  -1   32.09    1.17 
   8  10   1   31.85    1.24 
   8  10   1   30.63    1.31 
   8  10   1   31.08    1.02 
   8  10   1   32.09    1.12 
   8  10   1   30.29    1.26 
   8  10   1   30.13    1.17 
  -9 -10  -1   14.29    0.81 
  -9 -10  -1   14.81    0.78 
  -9 -10  -1   14.16    0.87 
  -9 -10  -1   15.44    0.83 
  -9 -10  -1   13.82    1.03 
   9  10   1   14.45    0.78 
   9  10   1   13.08    0.93 
   9  10   1   14.56    0.86 
   9  10   1   14.43    0.95 
   9  10   1   13.40    0.85 
 -10 -10  -1   14.90    0.92 
 -10 -10  -1   16.36    0.88 
 -10 -10  -1   16.56    0.85 
 -10 -10  -1   16.80    1.09 
 -10 -10  -1   15.84    0.89 
  10  10   1   15.18    0.92 
  10  10   1   15.04    0.92 
  10  10   1   16.18    0.84 
  10  10   1   15.14    1.03 
  10  10   1   14.37    1.02 
 -11 -10  -1   12.61    0.86 
 -11 -10  -1   13.18    1.05 
 -11 -10  -1   13.15    0.86 
 -11 -10  -1   12.86    0.82 
 -11 -10  -1   12.84    0.92 
  11  10   1   12.01    0.80 
  11  10   1   11.00    0.89 
  11  10   1   12.46    1.01 
  11  10   1   11.42    1.01 
 -12 -10  -1    6.43    0.92 
 -12 -10  -1    5.32    0.70 
 -12 -10  -1    6.16    0.78 
 -12 -10  -1    6.22    0.73 
 -12 -10  -1    6.12    0.71 
  12  10   1    4.14    0.66 
  12  10   1    5.51    0.62 
  12  10   1    5.44    0.81 
  12  10   1    5.13    0.84 
 -13 -10  -1   14.42    1.03 
 -13 -10  -1   16.01    1.09 
 -13 -10  -1   15.93    1.05 
 -13 -10  -1   14.61    0.97 
 -13 -10  -1   14.21    1.16 
  13  10   1   14.15    1.19 
  13  10   1   15.03    0.95 
  13  10   1   15.92    1.09 
  13  10   1   14.52    1.17 
 -14 -10  -1   30.32    1.48 
 -14 -10  -1   30.71    1.49 
 -14 -10  -1   30.97    1.48 
 -14 -10  -1   28.36    1.39 
 -14 -10  -1   30.41    1.62 
  14  10   1   28.97    1.29 
  14  10   1   27.34    1.65 
  14  10   1   29.88    1.47 
  14  10   1   28.02    1.55 
 -15 -10  -1   23.11    1.40 
 -15 -10  -1   23.34    1.37 
  15  10   1   18.94    1.41 
  15  10   1   22.03    1.19 
  15  10   1   23.87    1.36 
  15  10   1   21.30    1.44 
   9 -11  -1    0.90    0.77 
   9 -11  -1    1.28    0.56 
   9 -11  -1    0.88    0.69 
   9 -11  -1    2.32    0.62 
  -9  11   1    0.52    0.63 
  -9  11   1    0.93    0.65 
   8 -11  -1   -0.80    0.50 
   8 -11  -1   -0.48    0.64 
   8 -11  -1    0.36    0.48 
   8 -11  -1    0.13    0.49 
  -8  11   1   -0.78    0.52 
  -8  11   1   -0.89    0.50 
   7 -11  -1   10.11    1.09 
   7 -11  -1   11.18    0.92 
   7 -11  -1   11.89    1.10 
   7 -11  -1   13.01    0.97 
  -7  11   1   13.24    1.02 
  -7  11   1   12.85    1.00 
  -7  11   1    9.80    0.88 
   6 -11  -1   65.28    2.08 
   6 -11  -1   67.74    2.28 
   6 -11  -1   62.38    2.05 
   6 -11  -1   66.24    2.23 
  -6  11   1   66.20    2.13 
  -6  11   1   65.66    2.08 
  -6  11   1   63.02    2.05 
  -6  11   1   68.15    2.13 
   5 -11  -1   32.89    1.48 
   5 -11  -1   30.40    1.31 
   5 -11  -1   32.61    1.45 
   5 -11  -1   32.47    1.33 
  -5  11   1   31.95    1.37 
  -5  11   1   33.79    1.36 
  -5  11   1   31.16    1.28 
  -5  11   1   32.46    1.30 
   4 -11  -1   16.06    0.93 
   4 -11  -1   15.61    1.04 
   4 -11  -1   14.26    1.02 
   4 -11  -1   15.34    0.94 
  -4  11   1   14.16    0.89 
  -4  11   1   14.10    0.92 
  -4  11   1   16.71    0.87 
  -4  11   1   15.33    0.86 
   3 -11  -1    3.35    0.61 
   3 -11  -1    3.04    0.50 
   3 -11  -1    2.90    0.50 
   3 -11  -1    4.14    0.66 
  -3  11   1    3.00    0.50 
  -3  11   1    3.40    0.49 
  -3  11   1    3.18    0.54 
  -3  11   1    3.82    0.52 
  -3  11   1    2.96    0.52 
   2 -11  -1    0.28    0.46 
   2 -11  -1    0.05    0.41 
   2 -11  -1   -0.08    0.35 
   2 -11  -1    0.10    0.31 
  -2  11   1    0.08    0.32 
  -2  11   1    0.49    0.35 
  -2  11   1    0.20    0.34 
  -2  11   1   -0.36    0.27 
  -2  11   1    0.17    0.32 
   1 -11  -1   10.01    0.78 
   1 -11  -1   11.69    0.77 
   1 -11  -1   10.91    0.67 
   1 -11  -1   11.09    0.80 
   1 -11  -1   10.60    0.75 
  -1  11   1   11.64    0.72 
  -1  11   1   11.67    0.77 
  -1  11   1   11.43    0.63 
  -1  11   1   12.00    0.73 
  -1  11   1   11.29    0.71 
  -1  11   1   10.35    0.70 
   0 -11  -1  120.92    3.16 
   0 -11  -1  126.19    3.15 
   0 -11  -1  127.46    3.11 
   0 -11  -1  126.95    3.32 
   0 -11  -1  128.59    3.10 
   0 -11  -1  125.42    3.04 
   0  11   1  125.17    3.13 
   0  11   1  122.45    3.03 
   0  11   1  126.65    3.07 
   0  11   1  124.96    3.10 
   0  11   1  127.44    3.13 
   0  11   1  127.39    3.01 
  -1 -11  -1   20.04    0.79 
  -1 -11  -1   22.26    0.97 
  -1 -11  -1   21.00    1.05 
  -1 -11  -1   20.88    0.94 
  -1 -11  -1   20.02    0.98 
   1  11   1   21.76    0.90 
   1  11   1   19.25    0.93 
   1  11   1   20.78    0.91 
   1  11   1   22.24    0.95 
   1  11   1   21.44    0.92 
   1  11   1   19.93    0.87 
  -2 -11  -1   16.13    0.84 
  -2 -11  -1   18.95    1.02 
  -2 -11  -1   16.64    0.89 
  -2 -11  -1   18.32    0.94 
  -2 -11  -1   18.11    0.72 
  -2 -11  -1   18.02    0.80 
  -2 -11  -1   17.39    0.88 
   2  11   1   16.98    0.74 
   2  11   1   17.67    0.86 
   2  11   1   17.73    0.81 
   2  11   1   17.56    0.87 
   2  11   1   16.85    0.80 
   2  11   1   18.96    0.85 
  -3 -11  -1   26.25    1.04 
  -3 -11  -1   26.72    1.05 
  -3 -11  -1   26.73    1.08 
  -3 -11  -1   27.14    0.97 
  -3 -11  -1   26.06    1.13 
  -3 -11  -1   25.74    1.10 
  -3 -11  -1   26.02    1.20 
  -3 -11  -1   26.60    0.90 
   3  11   1   28.35    1.12 
   3  11   1   26.90    1.05 
   3  11   1   26.23    0.96 
   3  11   1   26.09    0.99 
   3  11   1   27.38    1.06 
   3  11   1   25.31    0.97 
  -4 -11  -1   15.07    0.67 
  -4 -11  -1   14.97    0.67 
  -4 -11  -1   14.35    0.84 
  -4 -11  -1   14.54    0.80 
  -4 -11  -1   14.09    0.93 
  -4 -11  -1   14.68    0.84 
   4  11   1   14.51    0.81 
   4  11   1   13.22    0.72 
   4  11   1   13.57    0.82 
   4  11   1   13.99    0.70 
   4  11   1   14.69    0.76 
   4  11   1   14.30    0.74 
  -5 -11  -1   39.08    1.35 
  -5 -11  -1   36.60    1.34 
  -5 -11  -1   37.96    1.19 
  -5 -11  -1   36.54    1.52 
   5  11   1   37.40    1.26 
   5  11   1   36.85    1.26 
   5  11   1   36.23    1.34 
   5  11   1   36.67    1.36 
   5  11   1   37.56    1.27 
   5  11   1   37.30    1.23 
  -6 -11  -1    0.89    0.32 
  -6 -11  -1    1.06    0.43 
  -6 -11  -1    0.80    0.37 
  -6 -11  -1    0.98    0.53 
   6  11   1    1.10    0.41 
   6  11   1    0.83    0.45 
   6  11   1    0.91    0.38 
   6  11   1    0.50    0.33 
   6  11   1    1.08    0.32 
   6  11   1    0.57    0.37 
  -7 -11  -1    1.37    0.40 
  -7 -11  -1    0.51    0.48 
  -7 -11  -1    0.66    0.35 
  -7 -11  -1    1.29    0.46 
   7  11   1    1.63    0.46 
   7  11   1    1.21    0.39 
   7  11   1    1.45    0.36 
   7  11   1    1.06    0.39 
   7  11   1    0.69    0.43 
   7  11   1    0.89    0.29 
  -8 -11  -1   12.40    0.99 
  -8 -11  -1   13.25    0.86 
  -8 -11  -1   14.44    0.82 
  -8 -11  -1   13.97    0.74 
  -8 -11  -1   13.31    0.75 
   8  11   1   13.14    0.87 
   8  11   1   14.05    0.80 
   8  11   1   14.42    0.96 
   8  11   1   14.40    0.89 
   8  11   1   13.23    0.67 
   8  11   1   13.43    0.79 
  -9 -11  -1    0.41    0.39 
  -9 -11  -1   -0.11    0.49 
  -9 -11  -1    0.17    0.35 
  -9 -11  -1    0.74    0.44 
  -9 -11  -1    0.29    0.36 
   9  11   1    0.74    0.36 
   9  11   1   -0.44    0.31 
   9  11   1    0.24    0.35 
   9  11   1    0.56    0.45 
   9  11   1   -0.39    0.43 
 -10 -11  -1    6.53    0.66 
 -10 -11  -1    6.05    0.62 
 -10 -11  -1    4.79    0.82 
 -10 -11  -1    6.25    0.71 
  10  11   1    4.64    0.73 
  10  11   1    4.46    0.63 
  10  11   1    6.04    0.80 
  10  11   1    6.14    0.63 
  10  11   1    6.41    0.69 
 -11 -11  -1    8.31    0.76 
 -11 -11  -1   10.23    1.11 
 -11 -11  -1    9.56    0.88 
 -11 -11  -1   10.60    0.80 
  11  11   1   10.63    0.81 
  11  11   1    7.31    0.76 
  11  11   1    9.02    0.96 
  11  11   1    9.16    0.97 
 -12 -11  -1   15.20    1.04 
 -12 -11  -1   15.82    1.42 
 -12 -11  -1   15.22    1.00 
 -12 -11  -1   15.34    0.99 
  12  11   1   13.04    1.15 
  12  11   1   17.12    1.09 
  12  11   1   14.78    1.14 
  12  11   1   16.08    0.95 
 -13 -11  -1   26.05    1.34 
 -13 -11  -1   26.15    1.53 
 -13 -11  -1   25.64    1.35 
 -13 -11  -1   23.41    1.28 
  13  11   1   25.99    1.53 
  13  11   1   23.62    1.41 
  13  11   1   23.92    1.16 
  13  11   1   23.44    1.33 
 -14 -11  -1   27.67    1.44 
 -14 -11  -1   29.65    1.50 
 -14 -11  -1   26.65    1.59 
  14  11   1   25.87    1.58 
  14  11   1   26.55    1.25 
  14  11   1   25.91    1.42 
  14  11   1   28.46    1.58 
 -15 -11  -1   -0.34    0.65 
  15  11   1    1.20    0.61 
  15  11   1    2.22    0.75 
  15  11   1    1.36    0.52 
  15  11   1    0.01    0.59 
   8 -12  -1    0.90    0.77 
   8 -12  -1    1.60    0.62 
   8 -12  -1    1.25    0.71 
  -8  12   1    1.76    0.68 
   7 -12  -1    7.70    0.85 
   7 -12  -1    9.40    1.00 
   7 -12  -1    9.23    1.10 
   7 -12  -1   10.52    0.98 
  -7  12   1   11.19    1.04 
  -7  12   1    7.04    0.81 
   6 -12  -1   26.10    1.42 
   6 -12  -1   24.25    1.28 
   6 -12  -1   26.67    1.31 
   6 -12  -1   26.59    1.49 
  -6  12   1   26.55    1.34 
  -6  12   1   25.49    1.28 
   5 -12  -1   23.01    1.32 
   5 -12  -1   20.24    1.16 
   5 -12  -1   22.37    1.30 
   5 -12  -1   22.13    1.16 
  -5  12   1   22.97    1.18 
  -5  12   1   21.73    1.18 
  -5  12   1   25.12    1.17 
   4 -12  -1    8.72    0.81 
   4 -12  -1   10.63    1.02 
   4 -12  -1   10.68    0.84 
   4 -12  -1    9.22    0.93 
  -4  12   1   11.17    0.94 
  -4  12   1    8.65    0.82 
  -4  12   1   10.71    0.75 
   3 -12  -1    3.14    0.65 
   3 -12  -1    3.04    0.67 
   3 -12  -1    1.98    0.48 
   3 -12  -1    2.98    0.54 
  -3  12   1    3.56    0.58 
  -3  12   1    2.53    0.48 
  -3  12   1    2.35    0.50 
   2 -12  -1    0.40    0.41 
   2 -12  -1    1.46    0.43 
   2 -12  -1    0.89    0.50 
   2 -12  -1    1.40    0.56 
  -2  12   1    0.83    0.38 
  -2  12   1    0.84    0.41 
  -2  12   1    1.00    0.40 
   1 -12  -1   29.17    1.29 
   1 -12  -1   31.90    1.30 
   1 -12  -1   32.75    1.31 
   1 -12  -1   31.61    1.26 
  -1  12   1   32.73    1.33 
  -1  12   1   30.73    1.19 
  -1  12   1   31.88    1.20 
   0 -12  -1   16.91    0.94 
   0 -12  -1   17.30    0.95 
   0 -12  -1   14.61    0.93 
   0 -12  -1   16.25    0.93 
   0 -12  -1   15.37    0.88 
   0  12   1   16.81    0.87 
   0  12   1   15.84    0.82 
   0  12   1   15.56    0.95 
  -1 -12  -1    0.66    0.40 
  -1 -12  -1    0.06    0.39 
  -1 -12  -1    0.60    0.39 
  -1 -12  -1    0.18    0.31 
  -1 -12  -1    0.53    0.45 
   1  12   1    0.29    0.30 
   1  12   1    0.20    0.34 
   1  12   1   -0.25    0.28 
  -2 -12  -1   16.51    0.84 
  -2 -12  -1   16.96    0.89 
  -2 -12  -1   15.03    0.99 
  -2 -12  -1   14.66    0.89 
   2  12   1   16.69    0.80 
   2  12   1   15.65    0.82 
   2  12   1   16.47    0.90 
   2  12   1   15.78    0.88 
   2  12   1   16.40    0.88 
  -3 -12  -1   24.93    1.12 
  -3 -12  -1   23.48    1.08 
  -3 -12  -1   26.50    1.01 
  -3 -12  -1   25.99    1.27 
   3  12   1   26.33    1.09 
   3  12   1   24.06    0.97 
   3  12   1   25.40    1.11 
   3  12   1   24.83    1.02 
   3  12   1   25.94    0.98 
   3  12   1   24.67    1.06 
  -4 -12  -1    8.18    0.88 
  -4 -12  -1    9.03    0.80 
   4  12   1    9.17    0.61 
   4  12   1    8.71    0.74 
   4  12   1    9.56    0.81 
   4  12   1    8.68    0.66 
   4  12   1    9.34    0.67 
   4  12   1    8.02    0.61 
  -5 -12  -1    8.84    0.93 
  -5 -12  -1   10.14    0.87 
  -5 -12  -1    8.45    0.80 
   5  12   1    9.44    0.70 
   5  12   1    9.75    0.69 
   5  12   1   10.50    0.82 
   5  12   1   10.18    0.69 
   5  12   1    9.82    0.71 
   5  12   1   10.48    0.80 
  -6 -12  -1   10.28    0.86 
  -6 -12  -1   10.99    0.80 
  -6 -12  -1   10.59    1.07 
   6  12   1   10.43    0.73 
   6  12   1   10.73    0.82 
   6  12   1   10.22    0.74 
   6  12   1   10.18    0.86 
   6  12   1   10.59    0.72 
   6  12   1   11.02    0.72 
  -7 -12  -1   27.00    1.18 
  -7 -12  -1   26.43    1.13 
  -7 -12  -1   23.50    1.35 
   7  12   1   26.58    1.05 
   7  12   1   25.11    1.22 
   7  12   1   26.82    1.08 
   7  12   1   26.64    1.20 
   7  12   1   25.77    1.08 
   7  12   1   25.87    1.14 
  -8 -12  -1   12.86    0.89 
  -8 -12  -1    9.90    1.03 
  -8 -12  -1   11.36    0.81 
   8  12   1   12.79    0.98 
   8  12   1   12.34    0.71 
   8  12   1   12.54    0.80 
   8  12   1   11.70    0.85 
   8  12   1   12.94    0.93 
   8  12   1   14.70    0.83 
  -9 -12  -1    4.32    0.65 
  -9 -12  -1    5.01    0.63 
  -9 -12  -1    5.16    0.84 
  -9 -12  -1    4.73    0.58 
   9  12   1    5.05    0.60 
   9  12   1    4.06    0.71 
   9  12   1    4.70    0.60 
   9  12   1    3.96    0.62 
   9  12   1    5.42    0.71 
 -10 -12  -1   12.40    0.94 
 -10 -12  -1   12.81    0.86 
 -10 -12  -1   13.21    1.26 
 -10 -12  -1   10.51    0.91 
  10  12   1   11.06    0.85 
  10  12   1   10.33    0.81 
  10  12   1   12.42    1.09 
  10  12   1   12.81    0.98 
  10  12   1   10.26    0.90 
 -11 -12  -1   29.50    1.59 
 -11 -12  -1   31.53    1.40 
 -11 -12  -1   28.67    1.34 
 -11 -12  -1   28.47    1.37 
  11  12   1   32.47    1.46 
  11  12   1   29.27    1.50 
  11  12   1   32.14    1.38 
  11  12   1   30.73    1.49 
  11  12   1   29.47    1.25 
 -12 -12  -1   96.53    2.75 
 -12 -12  -1   83.61    3.03 
  12  12   1   93.05    2.54 
  12  12   1   90.88    2.89 
  12  12   1   90.35    2.74 
  12  12   1   88.33    2.91 
 -13 -12  -1   33.23    1.78 
 -13 -12  -1   35.58    1.59 
  13  12   1   32.09    1.38 
  13  12   1   34.81    1.69 
  13  12   1   34.75    1.75 
  13  12   1   34.53    1.60 
 -14 -12  -1    6.60    0.93 
 -14 -12  -1    9.10    1.15 
  14  12   1    7.73    0.88 
  14  12   1    7.63    0.83 
  14  12   1    6.25    0.96 
  14  12   1    7.13    1.05 
   7 -13  -1   25.70    1.54 
   7 -13  -1   21.24    1.43 
   7 -13  -1   21.71    1.32 
  -7  13   1   24.55    1.38 
  -7  13   1   22.58    1.29 
   6 -13  -1   32.82    1.63 
   6 -13  -1   30.92    1.66 
   6 -13  -1   28.22    1.45 
  -6  13   1   32.81    1.50 
  -6  13   1   32.45    1.50 
   5 -13  -1   17.04    1.12 
   5 -13  -1   19.14    1.28 
   5 -13  -1   17.49    1.26 
  -5  13   1   17.64    1.15 
  -5  13   1   19.97    1.17 
   4 -13  -1   -0.16    0.45 
   4 -13  -1   -0.30    0.53 
   4 -13  -1   -0.50    0.60 
  -4  13   1    0.02    0.41 
  -4  13   1   -0.14    0.40 
  -4  13   1    0.32    0.45 
   3 -13  -1   -0.07    0.52 
   3 -13  -1   -0.31    0.41 
   3 -13  -1    0.32    0.60 
  -3  13   1    0.86    0.45 
  -3  13   1    1.13    0.48 
  -3  13   1    0.28    0.38 
   2 -13  -1   18.55    1.14 
   2 -13  -1   18.57    1.16 
   2 -13  -1   19.02    1.08 
  -2  13   1   20.99    1.14 
  -2  13   1   20.09    1.02 
  -2  13   1   19.84    1.01 
   1 -13  -1   65.03    2.07 
   1 -13  -1   61.49    2.08 
  -1  13   1   64.64    1.94 
  -1  13   1   64.98    1.96 
  -1  13   1   67.31    2.12 
   0 -13  -1   21.09    1.09 
   0 -13  -1   20.01    1.07 
   0 -13  -1   19.71    1.10 
   0 -13  -1   21.33    1.12 
   0  13   1   20.56    1.02 
   0  13   1   21.48    0.99 
   0  13   1   20.27    1.12 
  -1 -13  -1   11.19    0.78 
  -1 -13  -1   10.66    0.92 
  -1 -13  -1   10.68    0.88 
  -1 -13  -1    7.92    0.72 
   1  13   1   11.55    0.82 
   1  13   1   12.88    0.81
[truncated: 2,789,466 more chars]
